# Supplementary material for: Intravital imaging-based genetic screen reveals the transcriptional network governing Candida albicans filamentation during mammalian infection
Source: eLife. 2023 Feb 27;12:e85114. doi: 10.7554/eLife.85114 (PMC9995110; doi:10.7554/eLife.85114)
Supplement: Supplementary file 1. — The columns indicate: gene name; percentage filaments formed relative to co-infecting wild type (WT) strain; standard deviation; p value for comparison of the mutant to WT using paired Student’s t test. [file elife-85114-supp1.xlsx]

## Sheet: Sheet1
Name of TF	% Filaments formed	STDEV	P-Value
SWI4	64.3678	14.9443	0.302754
MAC1	75.5455	3.54547	0.617162
HMS1	70.4453	8.8196	0.0538067
AAF1	82.8221	8.15289	0.1414
RGT1	70.5347	6.35453	0.302754
CSR1	69.3453	5.35454	0.195627
ZCF7	67.3729	7.49143	0.4912
TYE7	72.4567	6.32435	0.484491
SFL1	70.5882	6.35341	0.260189
ACE2	69.4547	5.46545	0.780484
SSN6	78.8079	8.17981	0.506667
GZF3	72.3455	6.46546	0.285621
WOR2	78.5047	8.74964	0.4732
ZFU2	66.4723	5.67319	0.0904
CUP9	64.9819	9.39597	0.222675
HAP3	70.4565	6.35435	0.302754
ZCF13	62.7219	3.21455	0.507818
ZCF14	85.0877	15.3704	0.967805
ZCF19	86.7089	15.9478	0.638822
ZCF20	75.3769	38.3145	0.617162
ZCF22	71.3004	18.0831	0.566058
ZCF23	82.1429	3.21455	0.977231
ZCF24	79.8165	3.53553	0.137181
ZCF25	65.3333	8.74964	0.110484
ZCF29	63.4146	5.65685	0.472094
ZCF32	61.4108	10.504	0.23548
ZCF34	52.8302	18.9738	0.302754
ZCF2	65.4167	11.8624	0.345507
HAP5	68.6567	7.36081	0.682166
ZCF35	83.3333	4.76536	0.296953
ZNC2	65.7258	11.74	0.0677676
ZCF26	71.4876	2.15064	0.0958865
ZCF8	72.4565	4.65456	0.279313
ZCF28	73.1213	5.43545	0.436025
SFU1	75.4565	6.23214	0.0951799
ZCF5	70.1246	4.13214	0.803236
ZCF6	72.4547	4.4579	0.140811
ZCF27	76.1231	3.31232	0.120026
DAL81	76.1345	4.78943	0.221042
ARG83	71.9875	5.78923	0.434736
DPB4	72.4545	4.34355	0.436025
STP3	70.4546	5.46547	0.06889
STP4	65.9574	5.46302	0.0951175
HAP2	64.0187	10.1218	0.141148
FGR17	75.4655	4.54655	0.117446
ARG81	84.375	7.36406	0.803646
GAT1	87.6712	4.17836	0.643386
CAP1	78.0488	1.18415	0.143844
RTG3	73.7288	4.45347	0.0691414
FGR27	78.8079	8.17981	0.506667
MLN1	83.5443	5.54562	0.528976
TEA1	81.7021	2.98786	0.1092
MSN4	87.5	2.33273	0.463313
ASH1	79.6117	3.85321	0.19522
MNL1	83.5443	5.54562	0.528976
ZCF16	73.3696	6.33821	0.372754
HFL1	70.1299	3.36718	0.356579
CZF1	74.8031	1.98519	0.32328
OPI1	72.9167	7.7247	0.488853
CRZ2	65.9193	0.906547	0.0608489
UME7	75.641	2.06841	0.289834
ZCF15	68.4932	1.22167	0.248684
MIG1	73.4655	4.46547	0.28821
FCR1	73.9726	1.63178	0.28339
FCR3	78.8321	7.95513	0.656477
ORF19.173	73.125	2.70125	0.118695
SKN7	77.4194	4.72461	0.326634
SKO1	77.4194	4.72461	0.639815
WAR1	70.8075	5.37754	0.248044
SEF2	71.2329	7.23376	0.633156
CAS5	78.3505	8.47807	0.795784
HAP31	77.8947	7.88881	0.754489
HAP43	76.1347	6.34535	0.761932
ZCF1	78.3505	8.47807	0.795784
ASG1	77.3585	4.82118	0.612436
UPC2	79.8611	3.68706	0.834931
MRR1	79.4521	5.43093	0.843702
CRZ1	83.9286	0.0912396	0.859435
CTA4	78.9474	0.784041	0.233032
UGA3	67.9389	3.38035	0.17827
ZCF39	69.7248	2.85478	0.145488
INO4	64.5669	4.49312	0.241098
ZCF39	78.6456	3.35135	0.145488
TRY6	64.7059	5.03023	0.0618784
YOX1	77.9661	0.535807	0.550442
UGA33	74.3243	2.7461	0.295754
SUC1	61.3527	3.6732	0.102333
CWT1	73.5099	4.34168	0.891699
MBP1	78.626	11.0647	0.330819
TRY4	68.9266	9.36259	0.608458
UGA32	74.1117	8.4899	0.813856
ORF19.5651	73.9837	5.26128	0.597525
EFH1	68.8889	9.24768	0.587618
LYS14	74.3243	3.57267	0.616901
LYS144	74.1007	5.79601	0.61908
GAL4	64.3939	0.861587	0.168955
ZMS1	73.5294	4.71099	0.208999
CAT8	64.9425	6.26041	0.210675
MIG2	77.551	6.06284	0.856753
LYS142	63.981	5.01145	0.113356
HCM1	60.7843	5.06027	0.213044
OFI1	66.087	4.92909	0.215168
CUP2	70.3863	9.1159	0.365802
RME1	69.7917	1.76275	0.903203
RLM1	63.3333	5.18843	0.0529592
RTG1	64.5631	4.32845	0.0688332
ORF19.3928	59.6774	4.97618	0.521503
ZCF21	76.1194	6.27832	0.361448
LEU3	68.5	3.06707	0.467029
PHO4	69.4268	8.57818	0.196182
CTF1	72.8261	4.98933	0.478263
TAC1	77.1429	6.4341	0.918727
ORF19.2730.	58.0645	3.87454	0.0291
ORF19.1274	76.8595	10.2274	0.795489
RPN4	72.9167	4.66944	0.0889189
ORF19.1496	68.0851	6.01114	0.621576
ORF19.2476	65.1515	7.60623	0.131373
ORF19.2961	63.8554	8.17222	0.681959
GZF3	74.2718	4.44348	0.285621
FGR15	68.6567	7.29454	0.0463693
ORF19.3625	71.9512	5.31474	0.520539
ORF19.5249	85.7143	5.30205	0.376552
STB5	73.622	6.45457	0.12456
ORF19.591	68.5864	4.96544	0.139669
ORF19.6888	74.6269	2.20084	0.772107
ORF19.2612	70.6215	8.10811	0.758562
ORF19.1577	67.4757	7.06903	0.141188
ARO80	71.5152	6.37529	0.631543
ORF19.1257	74.5902	4.04391	0.246918
ORF19.2743	70.1439	5.51021	0.107031
PPR1	63.3333	5.18843	0.762256
LYS143	72.9167	4.66944	0.073388
RFX1	74.6269	2.20084	0.627577
GIS2	75.659	3.46567	0.716326
KAR4	74.4547	4.32326	0.732624
RAP1	70.6546	3.13247	0.927088
TRY5	76.1905	4.92848	0.46886
ZCF17	70.7602	4.15198	0.499297
GLN3	83.2	5.27163	0.486463
GRF10	68.6275	2.63465	0.0321962
ORF19.217	71.345	4.93453	0.074862
ORF19.6874	65.6109	3.57382	0.000237765
AHR1	66.9421	7.03406	0.00190673
TUP1	90.2439	5.20893	0.001
CPH2	56.9579	10.5451	0.00880885
STP2	39.8964	10.3709	0.000715352
STP2 + ARG4	61.5044	9.32133	0.0894678
ORF19.1150	57.7586	7.56629	0.0183327
NRG1	95.2381	5.7735	0.0167419
UME6	70.7143	8.74964	0.459772
ROB1	23.0435	6.67067	0.000233042
NDT80	54.9296	5.80813	0.000765007
SEF1	60	3.69429	0.0180282
SFL2	60	3.70523	0.00640856
ZCF3	61.2299	4.40797	0.00176697
BCR1	56.338	5.24675	0.00683067
RIM101	48.6207	15.7531	0.0031945
ISW2	54.5706	6.95794	0.00011131
ZCF31	55.9701	5.17308	3.44749e-06
BRG1	21.2454	4.17862	3.78669e-05
EFG1	8.61958	2.13245	0.0016
TEC1	45.7086	7.27286	0.000715352
