# Supplementary material for: Intravital imaging-based genetic screen reveals the transcriptional network governing Candida albicans filamentation during mammalian infection
Source: eLife. 2023 Feb 27;12:e85114. doi: 10.7554/eLife.85114 (PMC9995110; doi:10.7554/eLife.85114)
Supplement: Supplementary file 2. — The columns indicate: gene name; mean length of the wild type (WT); mean length of the mutant; p value for comparison of WT to mutant by Mann-Whitney U test; and relative length of the mutant with its co-infecting WT set to 100%. Bold indicates mutants with statistically different filament lengths (p<0.05). [file elife-85114-supp2.xlsx]

## Sheet: Sheet1
	Filament length (microns)
Name TF	WT	TF mutant	P value	Filament length %
GAT1	40.1995	21.5875	0.0001	53.7009
ASH1	44.1644	43.647	0.9118	98.8287
MSN4	47.602	37.8365	0.0141	79.485
CRZ2	42.5271	32.2319	0.0007	75.7914
ZCF1	37.7841	27.2362	0.0001	72.0837
CRZ1	32.1236	26.1052	0.0041	81.2649
INO4	45.3343	37.124	0.0121	81.8894
MRR1	37.7176	34.9221	0.355	92.5882
GAL4	31.4147	29.1111	0.1121	92.6671
ZMS1	32.6646	29.9229	0.4084	91.6067
CAT8	30.5869	29.7567	0.6599	97.2859
MIG2	33.272	29.1126	0.0877	87.4987
RLM1	32.8429	28.396	0.6779	86.4601
AHR1	28.0507	25.6381	0.1128	91.3991
19.3928	40.1708	36.5567	0.3078	91.0031
19.214	41.6284	37.2767	0.4993	89.5463
RPN4	38.5012	32.4174	0.0675	84.1983
19.1496	32.8224	24.5465	0.0001	74.7859
19.2476	40.5153	40.6323	0.816	100.289
19.2961	29.5209	27.6075	0.067	93.5185
GZF3	33.7233	32.3383	0.5636	95.893
19.1757	31.5487	26.2332	0.0369	83.1514
19.2743	42.2388	34.0122	0.0176	80.5235
ZFU2	30.8812	33.1288	0.4939	107.278
ZCN2	33.8929	25.6963	0.0001	75.8161
ZCF26	33.5325	33.1994	0.9737	99.0067
HAP2	33.6473	33.8437	0.7872	100.584
STP4	33.0893	36.1553	0.0764	109.266
FGR17	36.8562	33.0366	0.2634	89.6366
RTG3	29.2555	23.2478	0.0007	79.4646
CAP1	30.1456	26.2322	0.1939	87.0183
FGR27	38.8833	37.4124	0.8232	96.2173
MLN1	32.5194	32.8018	0.5805	100.869
TEA1	32.5194	37.8681	0.1444	116.448
CZF1	49.9522	61.1532	0.1887	122.423
OPI1	36.25	34.5884	0.9072	95.4163
FCR1	38.8833	27.8004	0.0018	71.4972
FCR3	43.1926	48.4169	0.3399	112.095
MIG1	28.688	25.9237	0.0587	90.3644
ORF19.173	31.8414	26.8545	0.003	84.3382
SKO1	33.7668	29.006	0.0021	85.9007
SEF2	32.776	31.4388	0.969	95.9201
HAP31	33.2679	36.1038	0.2	108.524
HAP43	26.6038	24.2517	0.2139	91.1586
ASG1	29.3754	28.6882	0.724	97.6607
CTA4	27.3874	27.8284	0.6605	101.61
UGA3	47.2072	42.2903	0.244	89.5845
ZCF39	33.7224	28.8148	0.0026	85.4471
SUC1	29.7323	26.205	0.2238	88.1364
YOX1	35.8024	30.76	0.1239	85.9162
UGA33	26.3121	27.0773	0.6171	102.908
MBP1	29.7262	29.007	0.8109	97.5806
TRY4	29.2732	26.7746	0.4511	91.4645
19.5651	39.6864	34.4426	0.052	86.7868
EFH1	31.9215	29.7536	0.15	93.2085
LYS144	35.5513	31.4911	0.1692	88.5795
OFI	27.9033	23.7283	0.0142	85.0377
RME1	32.5194	27.5639	0.057	84.7615
RTG1	31.8322	32.8288	0.6227	103.131
CTF1	31.1538	30.037	0.6586	96.4152
19.2174	26.0858	24.2772	0.9486	93.0669
19.3625	41.8823	27.658	0.0001	66.0374
19.5249	45.8867	40.1907	0.0845	87.5869
19.2612	28.0223	22.1585	0.0224	79.0745
CTA7	32.9184	27.8062	0.0498	84.47
HAL9	38.008	35.2956	0.3638	92.8636
ZCF2	33.2597	26.8123	0.158	80.6151
HAP5	34.0315	29.3564	0.1272	86.2625
ZCF35	30.1555	23.8121	0.0087	78.9644
ZCF28	33.7224	31.4388	0.1672	93.2282
SFU4	35.6668	28.0762	0.0024	78.718
ZCF4	38.9776	28.5712	0.0019	73.3017
ZCF5	33.433	29.1896	0.0847	87.3078
ZCF6	46.934	46.1132	0.7112	98.2511
ZCF27	37.8604	34.7193	0.3316	91.7036
DAL81	42.4788	26.8673	0.0001	63.2489
CPH2	36.6043	21.23	0.0001	57.9985
ARG83	40.6913	30.8752	0.0025	75.8767
CUP9	34.4313	28.8735	0.1243	83.8583
STP2	31.0266	19.4046	0.0001	62.5417
HAP2	33.7031	39.3667	0.2078	116.804
PPR1	34.8171	31.4293	0.2594	90.2698
RGT1	37.0934	28.4559	0.001	76.7143
KAR4	42.4788	36.9718	0.1505	87.036
RAP1	39.6864	38.3382	0.9398	96.6029
19.273	35.133	25.2101	0.0001	71.7563
FGR15	38.6592	28.8344	0.0031	74.5862
GRF10	39.1902	25.1283	0.0001	64.1188
19.6874	29.5027	19.7728	0.0001	67.0203
AHR1	33.4799	21.8427	0.0001	65.2413
19.115	34.788	27.0902	0.0001	77.8721
ROB1	38.9587	15.4558	0.0001	39.6723
NDT80	42.7551	29.3365	0.0001	68.6152
SEF1	31.6741	18.6489	0.0001	58.8773
SFL2	36.1702	25.9427	0.0001	71.724
ZCF3	36.7337	24.0124	0.0001	65.3688
BCR1	35.4136	26.639	0.0001	75.2224
RIM101	41.2447	22.6435	0.0001	54.9004
ISW2	48.8498	25.6238	0.0001	52.4542
ZCF31	35.2717	24.2593	0.0001	68.7784
TEC1	34.9061	17.8856	0.0001	51.2391
NRG1	34.9286	63.762	0.0001	182.549
TUP1	32.5112	73.2234	0.0001	225.225
SFL1	40.0491	35.2734	0.3766	88.0755
GZF3	37.266	35.3333	0.4044	94.8138
WOR2	44.4425	45.7898	0.9507	103.031
SSN6	50.6847	49.9416	0.4643	98.5339
CAS5	44.9049	49.3271	0.6104	109.848
STP4	33.4755	34.0404	0.9186	101.688
HFL1	37.9952	36.1078	0.3317	95.0325
ZCF13	35.1095	35.4336	0.9999	100.923
UME6	30.3841	19.3857	0.0001	63.8023
ARG81	43.0278	37.0213	0.0242	86.0404
HAP3	32.777	28.2447	0.0448	86.1725
ZCF16	41.2327	41.9593	0.3813	101.762
UME7	51.4457	47.6697	0.0493	92.6603
UPC2	32.9913	30.5979	0.6847	92.7451
TRY6	33.0896	34.2658	0.6532	103.555
CWT1	35.9817	31.0812	0.2854	86.3806
UGA32	30.9191	28.3324	0.3429	91.6338
LYS14	37.171	21.3939	0.0001	57.5554
CUP2	42.6396	41.3591	0.7013	96.9969
HCM	36.4486	29.9659	0.0605	82.2141
LYS142	42.406	39.3951	0.4758	92.8997
LEU3	31.8204	26.0408	0.0301	81.8369
ZCF21	48.7715	44.3882	0.1564	91.0127
19.273	55.2869	38.658	0.0002	69.9225
PHO4	41.8826	41.7436	0.9336	99.6681
TAC1	43.7765	34.4165	0.0561	78.6188
19.1577	39.3111	37.4973	0.7415	95.3859
19.591	40.7118	31.7318	0.0011	77.9425
19.6888	38.6618	38.3153	0.9373	99.1036
ARO80	42.1783	43.0401	0.8363	102.043
STB5	30.093	26.7171	0.3603	88.7816
GLN3	26.6837	24.8319	0.367	93.0604
TRY5	44.5744	43.8092	0.7904	98.2833
ZCF17	39.9845	48.9622	0.0585	122.453
ZCF8	34.788	32.7673	0.5164	94.1912
GIS2	27.0921	33.5063	0.0938	123.676
AAF1	42.2836	44.6214	0.5713	105.529
CSR1	41.2327	47.1739	0.1333	114.409
DPB4	36.286	31.0067	0.074	85.4509
MAC1	42.2836	40.0334	0.3534	94.6783
RFX1	38.5805	37.5118	0.7135	97.23
SKN7	43.0278	48.2645	0.3105	112.17
SWI4	35.8024	42.3256	0.2417	118.22
ZCF20	29.4819	27.0888	0.1601	91.8828
ZCF23	33.7058	33.4129	0.6764	99.131
ZCF24	31.64	25.4561	0.0017	80.4553
ZCF25	40.0087	28.7856	0.0001	71.9485
ZCF32	31.9424	28.2633	0.0231	88.4822
HMS1	43.6968	27.6819	0.0001	63.3499
LYS143	45.3404	40.8085	0.0845	90.0047
TYE7	32.7058	31.4129	0.644	96.0469
WAR1	33.2679	21.3249	0.0001	64.1006
ZCF14	36.5717	32.846	0.6687	89.8125
ZCF15	37.4253	30.418	0.0013	81.2767
ZCF19	33.2679	31.5664	0.5324	94.8856
ZCF22	31.625	30.264	0.2412	95.6965
ZCF29	28.8683	21.5806	0.0147	74.7554
ZCF34	36.199	35.2319	0.535	97.3282
ZCF7	40.3597	37.6378	0.159	93.2557
ACE2	32.2679	29.5664	0.5457	91.6281
STP2-PROTO	38.9282	33.5373	0.0515	86.1517
