# Supplementary material for: Intravital imaging-based genetic screen reveals the transcriptional network governing Candida albicans filamentation during mammalian infection
Source: eLife. 2023 Feb 27;12:e85114. doi: 10.7554/eLife.85114 (PMC9995110; doi:10.7554/eLife.85114)
Supplement: Supplementary file 3. — The gene names; raw nCounter counts for wild type (WT) and the mutant strains; normalized counts; average counts for the strains; counts normalized to WT; fold-change for the gene expression in the mutant relative to WT; the p value calculated using Student’s t test; and the false discovery rate (FDR) calculated using the Benjamini-Yekutieli procedure are provided. Red indicates a gene downregulated by twofold relative to WT with FDR ≤0.1; green indicates a gene upregulated using the same criteria. [file elife-85114-supp3.xlsx]

## Sheet: RPMI+10%Serum
Probe Name		Counts after Background subtraction													Normalize count - H			Normalize count - efg1			Normalize count - rob1			Normalize count - brg1				Avg_Individual replicates					Normalize to WT_Avg					Probe name	efg1ΔΔ/WT			rob1ΔΔ/WT			brg1ΔΔ/WT
		WT_H1	WT_H2	WT_H3	efg1ΔΔ	efg1ΔΔ	efg1ΔΔ	rob1ΔΔ	rob1ΔΔ	rob1ΔΔ	brg1ΔΔ	brg1ΔΔ	brg1ΔΔ		WT_H1	WT_H2	WT_H3	efg1ΔΔ	efg1ΔΔ	efg1ΔΔ	rob1ΔΔ	rob1ΔΔ	rob1ΔΔ	brg1ΔΔ	brg1ΔΔ	brg1ΔΔ		Avg_WT	Avg_efg1ΔΔ	Avg_rob1ΔΔ	Avg_brg1ΔΔ		WT	efg1ΔΔ	rob1ΔΔ	brg1ΔΔ			FC	T-test	FDR	FC	T-test	FDR	FC	T-test	FDR
ACE2		261.562	241.277	209.498	122.506	269.598	208.075	165.699	154.408	91.6748	207.885	231.173	242.284		289.071	248.485	209.498	163.801	269.598	276.57	192.518	154.408	104.732	231.972	248.234	242.284		249.018	236.656	150.553	240.83		249.018	258.835	163.592	245.644		ACE2	1.03943	0.788567	0.214503	0.656949	0.0452775	0.335098	0.986452	0.744663	0.0424085
ACS1		19954.6	21972.3	19044.5	2248.51	3670.6	2427.07	37567.7	44377.4	46228.7	20738.9	17998.2	31514.3		22053.2	22628.6	19044.5	3006.43	3670.6	3226.03	43648.2	44377.4	52812.9	23141.9	19326.4	31514.3		21242.1	3301.02	46946.2	24660.9		21242.1	3610.39	51012.1	25153.8		ACS1	0.169964	9.14403e-05	0.000140355	2.40146	0.00121867	0.205647	1.18415	0.415449	0.00271344
ACS2		2689.56	2871.28	2835.5	3019.51	4294.6	3371.07	3066.7	3618.41	3044.67	3671.88	3684.17	3597.28		2972.42	2957.05	2835.5	4037.32	4294.6	4480.78	3563.05	3618.41	3478.32	4097.34	3956.06	3597.28		2921.66	4270.9	3553.26	3883.56		2921.66	4671.17	3861.01	3961.19		ACS2	1.59881	0.000573971	0.000424075	1.32151	0.000444532	0.00460506	1.3558	0.00343054	0.00150391
ADH5		15924.6	17451.3	21201.5	9128.51	10263.6	7095.07	7251.7	12498.4	8359.67	11088.9	9887.17	11418.3		17599.3	17972.6	21201.5	12205.5	10263.6	9430.66	8425.41	12498.4	9550.32	12373.7	10616.8	11418.3		18924.5	10633.3	10158	11469.6		18924.5	11629.8	11037.8	11698.9		ADH5	0.614538	0.00416257	0.00204009	0.583257	0.00627448	0.00500876	0.618188	0.00398424	0.00899342
AHR1		711.562	709.277	538.498	265.506	536.598	435.075	504.699	649.408	446.675	549.885	699.173	540.284		786.397	730.465	538.498	355.003	536.598	578.295	586.386	649.408	510.293	613.599	750.771	540.284		685.12	489.965	582.029	634.885		685.12	535.884	632.438	647.576		AHR1	0.782176	0.127306	0.0422928	0.923106	0.292717	0.292908	0.945201	0.632415	0.18422
ALS1		11885.6	12346.3	15774.5	61.5064	137.598	113.075	7829.7	12723.4	7915.67	12479.9	14680.2	13285.3		13135.6	12715.1	15774.5	82.239	137.598	150.297	9096.96	12723.4	9043.08	13925.9	15763.6	13285.3		13875.1	123.378	10287.8	14324.9		13875.1	134.941	11178.8	14611.3		ALS1	0.00972544	0.000136676	0.000172136	0.805679	0.0815329	0.33005	1.05306	0.729277	0.0688662
ALS2		78.5622	93.277	125.498	566.506	766.598	613.075	237.699	189.408	121.675	159.885	167.173	174.284		86.8246	96.0634	125.498	757.465	766.598	814.89	276.171	189.408	139.005	178.41	179.511	174.284		102.795	779.651	201.528	177.402		102.795	852.719	218.982	180.948		ALS2	8.29532	5.83696e-06	3.8288e-05	2.13028	0.0771108	0.00456513	1.76027	0.00317023	0.0663153
ALS3		25020.6	25896.3	20372.5	115.506	272.598	154.075	3172.7	3395.41	3502.67	3432.88	3656.17	4272.28		27652	26669.9	20372.5	154.441	272.598	204.794	3686.21	3395.41	4001.55	3830.65	3925.99	4272.28		24898.1	210.611	3694.39	4009.64		24898.1	230.349	4014.36	4089.79		ALS3	0.00925168	0.000413277	0.000346752	0.161231	0.000752946	0.00190546	0.164261	0.000793937	0.00197859
ALS4		365.562	369.277	260.498	928.506	1024.6	926.075	636.699	851.408	725.675	845.885	914.173	847.284		404.008	380.308	260.498	1241.49	1024.6	1230.92	739.751	851.408	829.031	943.896	981.638	847.284		348.271	1165.67	806.73	924.273		348.271	1274.92	876.6	942.749		ALS4	3.6607	0.000607794	0.000424724	2.517	0.00121264	0.00160561	2.70694	0.000648727	0.00271344
ALS5		137.562	175.277	121.498	66.5064	199.598	153.075	83.6989	86.408	70.6748	202.885	214.173	162.284		152.03	180.513	121.498	88.9244	199.598	203.465	97.2458	86.408	80.7408	226.393	229.979	162.284		151.347	163.996	88.1315	206.219		151.347	179.365	95.7645	210.341		ALS5	1.18513	0.774348	0.214135	0.632749	0.023405	0.0703105	1.38979	0.119847	0.0246013
ALS6		5.56224	18.277	1	1	22.5982	5.07474	1	1	1	1	1	1		6.14722	18.823	1	1	22.5982	6.74527	1	1	1	1	1	1		8.65674	10.1145	1	1		8.65674	11.0624	1.08661	1.01999		ALS6	1.2779	0.869921	0.232763	0.125522	0.221761	0.121128	0.117826	0.221761	0.150925
ALS7		501.562	486.277	528.498	5858.51	9852.6	6747.07	456.699	440.408	379.675	586.885	620.173	596.284		554.312	500.803	528.498	7833.29	9852.6	8968.11	530.617	440.408	433.751	654.886	665.941	596.284		527.871	8884.67	468.259	639.037		527.871	9717.33	508.814	651.811		ALS7	18.4085	0.000139137	0.000172136	0.963899	0.16234	0.0132353	1.23479	0.0138703	0.118325
ALS9		45.5622	50.277	1	15.5064	110.598	73.0747	61.6989	61.408	74.6748	109.885	83.1734	73.2839		50.354	51.7789	1	20.7333	110.598	97.1298	71.685	61.408	85.3105	122.617	89.3115	73.2839		34.3776	76.1538	72.8012	95.0707		34.3776	83.2908	79.1064	96.9712		ALS9	2.42282	0.269059	0.0848306	2.3011	0.100649	0.0366133	2.82076	0.0517764	0.0827944
AOX2		1981.56	2145.28	2303.5	358.506	882.598	386.075	417.699	315.408	315.675	2272.88	2491.17	2727.28		2189.96	2209.36	2303.5	479.352	882.598	513.165	485.305	315.408	360.635	2536.24	2675.02	2727.28		2234.27	625.038	387.116	2646.18		2234.27	683.616	420.644	2699.08		AOX2	0.305968	0.000274188	0.000256092	0.188269	7.42627e-06	0.00461831	1.20803	0.00353553	0.000106162
ARG1		438.562	464.277	484.498	187.506	217.598	289.075	114.699	114.408	133.675	448.885	481.173	194.284		484.686	478.146	484.498	250.711	217.598	384.234	133.263	114.408	152.714	500.896	516.683	194.284		482.443	284.181	133.462	403.954		482.443	310.814	145.021	412.029		ARG1	0.64425	0.0177016	0.00700983	0.300596	6.46989e-06	0.235293	0.854048	0.496136	0.000106162
ARG81		192.562	215.277	172.498	246.506	485.598	324.075	255.699	234.408	222.675	293.885	298.173	301.284		212.814	221.708	172.498	329.599	485.598	430.755	297.085	234.408	254.39	327.937	320.178	301.284		202.34	415.317	261.961	316.466		202.34	454.241	284.649	322.792		ARG81	2.24494	0.0114685	0.00485206	1.40679	0.0671084	0.00413527	1.5953	0.00261065	0.0593313
BCR1		702.562	731.277	720.498	439.506	805.598	649.075	681.699	653.408	551.675	782.885	822.173	706.284		776.451	753.122	720.498	587.655	805.598	862.74	792.034	653.408	630.248	873.596	882.849	706.284		750.023	751.998	691.897	820.91		750.023	822.474	751.821	837.319		BCR1	1.0966	0.982654	0.258731	1.0024	0.334798	0.155229	1.11639	0.300249	0.200455
BRG1		2178.56	2446.28	3135.5	273.506	403.598	376.075	1282.7	1656.41	1685.67	1.88472	14.1734	1		2407.68	2519.35	3135.5	365.7	403.598	499.873	1490.31	1656.41	1925.76	2.10309	15.2194	1		2687.51	423.057	1690.83	6.10749		2687.51	462.705	1837.27	6.22957		BRG1	0.172169	0.000594893	0.000424724	0.683631	0.0184335	0.000870182	0.00231797	0.000290703	0.0205154
CAP1		717.562	807.277	657.498	491.506	841.598	525.075	966.699	839.408	798.675	1043.88	1209.17	997.284		793.028	831.392	657.498	657.184	841.598	697.921	1123.16	839.408	912.428	1164.84	1298.41	997.284		760.639	732.234	958.333	1153.51		760.639	800.859	1041.33	1176.57		CAP1	1.05288	0.730506	0.204294	1.36902	0.119472	0.0163622	1.54682	0.0181803	0.0934104
CAT1		1815.56	1965.28	1782.5	79.5064	263.598	103.075	1339.7	1720.41	1077.67	867.885	760.173	1422.28		2006.5	2023.98	1782.5	106.306	263.598	137.005	1556.53	1720.41	1231.16	968.445	816.273	1422.28		1937.66	168.97	1502.7	1069		1937.66	184.806	1632.85	1090.37		CAT1	0.0953756	4.21139e-05	9.0628e-05	0.842691	0.0563234	0.0118242	0.562724	0.0117943	0.0512326
CDC10		163.562	202.277	143.498	344.506	470.598	289.075	74.6989	159.408	116.675	193.885	214.173	205.284		180.764	208.319	143.498	460.633	470.598	384.234	86.7891	159.408	133.292	216.35	229.979	205.284		177.527	438.488	126.497	217.204		177.527	479.583	137.452	221.546		CDC10	2.70146	0.00140268	0.000826591	0.774261	0.146246	0.0703105	1.24796	0.119545	0.108936
CDR1		3178.56	3347.28	3967.5	788.506	1368.6	997.075	2709.7	3172.41	3508.67	5938.88	6578.17	5772.28		3512.85	3447.27	3967.5	1054.3	1368.6	1325.3	3148.27	3172.41	4008.41	6627.01	7063.63	5772.28		3642.54	1249.4	3443.03	6487.64		3642.54	1366.49	3741.23	6617.33		CDR1	0.375147	0.000232812	0.000249712	1.02709	0.574382	0.00391088	1.81668	0.00232774	0.312279
CDR2		24.5622	24.277	1	1	37.5982	2.07474	21.6989	10.408	1	14.8847	5.17339	2.28386		27.1455	25.0022	1	1	37.5982	2.75771	25.2109	10.408	1	16.6094	5.55518	2.28386		17.7159	13.7853	12.2063	8.14947		17.7159	15.0773	13.2635	8.31238		CDR2	0.851058	0.800669	0.216575	0.748676	0.641284	0.186816	0.469205	0.36797	0.338913
CHT2		2718.56	2843.28	3098.5	3937.51	5603.6	4308.07	944.699	1208.41	619.675	1646.88	2039.17	2236.28		3004.47	2928.21	3098.5	5264.76	5603.6	5726.23	1097.6	1208.41	707.933	1837.71	2189.66	2236.28		3010.39	5531.53	1004.65	2087.88		3010.39	6049.94	1091.66	2129.62		CHT2	2.00968	6.6941e-05	0.000127748	0.36263	0.000230462	0.00391088	0.707422	0.0024059	0.00103817
CHT3		772.562	939.277	650.498	1895.51	2413.6	2185.07	1233.7	1114.41	1035.67	1989.88	2026.17	2261.28		853.813	967.335	650.498	2534.44	2413.6	2904.37	1433.38	1114.41	1183.18	2220.45	2175.7	2261.28		823.882	2617.47	1243.66	2219.15		823.882	2862.78	1351.37	2263.51		CHT3	3.47474	0.000503139	0.000395293	1.64025	0.035173	0.000605135	2.74737	0.000129887	0.0350249
CIT1		16859.6	17534.3	19110.5	1440.51	3570.6	1948.07	46369.7	49980.4	45305.7	28647.9	24995.2	47037.3		18632.7	18058.1	19110.5	1926.07	3570.6	2589.35	53874.8	49980.4	51758.4	31967.3	26839.8	47037.3		18600.4	2695.34	51871.2	35281.4		18600.4	2947.95	56363.7	35986.7		CIT1	0.158488	9.5644e-06	4.1161e-05	3.03024	8.97779e-06	0.0366133	1.93473	0.0514517	0.000106162
CPH1		304.562	319.277	409.498	98.5064	209.598	152.075	153.699	162.408	106.675	196.885	245.173	238.284		336.593	328.815	409.498	131.711	209.598	202.135	178.576	162.408	121.868	219.697	263.267	238.284		358.302	181.148	154.284	240.416		358.302	198.125	167.646	245.222		CPH1	0.552956	0.00770913	0.00340715	0.467891	0.00267372	0.0138034	0.684401	0.01464	0.00428702
CPH2		1358.56	1387.28	1337.5	1699.51	2462.6	1659.07	896.699	1300.41	1004.67	1592.88	1763.17	1535.28		1501.44	1428.72	1337.5	2272.38	2462.6	2205.22	1041.83	1300.41	1147.77	1777.45	1893.29	1535.28		1422.55	2313.4	1163.34	1735.34		1422.55	2530.21	1264.09	1770.03		CPH2	1.77864	0.000597382	0.000424724	0.888608	0.0432521	0.037379	1.24426	0.0538278	0.0409333
CRH11		1167.56	1266.28	1084.5	1996.51	2380.6	1528.07	348.699	831.408	465.675	1409.88	1465.17	1401.28		1290.35	1304.1	1084.5	2669.49	2380.6	2031.09	405.137	831.408	531.999	1573.25	1573.3	1401.28		1226.32	2360.39	589.515	1515.94		1226.32	2581.61	640.572	1546.25		CRH11	2.10517	0.00457977	0.00220097	0.522354	0.0117554	0.0259554	1.26089	0.0337551	0.0144423
CSA1		9499.56	9951.28	11636.5	5616.51	6140.6	4482.07	8124.7	16533.4	11152.7	24536.9	28066.2	28625.3		10498.6	10248.5	11636.5	7509.72	6140.6	5957.5	9439.71	16533.4	12741.1	27379.9	30137.4	28625.3		10794.6	6535.94	12904.7	28714.2		10794.6	7148.48	14022.4	29288.2		CSA1	0.66223	0.00280353	0.00146077	1.29903	0.370481	0.000328545	2.71324	3.8287e-05	0.217686
CSH1		1233.56	1382.28	1399.5	1392.51	2236.6	1472.07	4925.7	5564.41	6453.67	2631.88	3313.17	2648.28		1363.3	1423.57	1399.5	1861.89	2236.6	1956.66	5722.94	5564.41	7372.85	2936.84	3557.68	2648.28		1395.45	2018.38	6220.07	3047.6		1395.45	2207.54	6758.78	3108.52		CSH1	1.58195	0.00542729	0.00255858	4.84343	0.00112957	0.00461831	2.22761	0.00355703	0.00269589
DAK2		1037.56	1215.28	1145.5	3515.51	3874.6	3178.07	1211.7	1618.41	1254.67	1666.88	1701.17	1786.28		1146.68	1251.58	1145.5	4700.51	3874.6	4224.25	1407.82	1618.41	1433.37	1860.02	1826.72	1786.28		1181.25	4266.45	1486.53	1824.34		1181.25	4666.3	1615.28	1860.81		DAK2	3.9503	0.000217836	0.00024189	1.36743	0.0152804	0.000495446	1.57528	9.76495e-05	0.0178459
DDR48		10279.6	11521.3	8854.5	1	48.5982	31.0747	6360.7	7287.41	4985.67	4316.88	5695.17	7784.28		11360.7	11865.4	8854.5	1	48.5982	41.3041	7390.2	7287.41	5695.77	4817.07	6115.47	7784.28		10693.5	30.3008	6791.13	6238.94		10693.5	33.1405	7379.3	6363.66		DDR48	0.00309912	0.000331773	0.000288142	0.690071	0.0225262	0.020439	0.595094	0.0245165	0.0239436
DFG5		521.562	584.277	425.498	624.506	840.598	577.075	319.699	470.408	340.675	613.885	723.173	794.284		576.415	601.731	425.498	835.015	840.598	767.039	371.443	470.408	389.196	685.015	776.543	794.284		534.548	814.217	410.349	751.947		534.548	890.525	445.889	766.978		DFG5	1.66594	0.00951397	0.00416764	0.834143	0.119478	0.0229925	1.43482	0.02816	0.0934104
ECE1		58600.6	62013.3	60486.5	1	1	1	305.699	218.408	151.675	1055.88	1176.17	1128.28		64763.6	63865.8	60486.5	1	1	1	355.177	218.408	173.277	1178.23	1262.97	1128.28		63038.6	1	248.954	1189.83		63038.6	1.09372	270.516	1213.61		ECE1	1.735e-05	1.08921e-06	3.7363e-05	0.00429127	1.11039e-06	9.32501e-05	0.0192519	1.17741e-06	0.000105044
ECM331		1054.56	1166.28	822.498	460.506	650.598	592.075	88.6989	89.408	43.6748	177.885	277.173	207.284		1165.47	1201.12	822.498	615.734	650.598	786.977	103.055	89.408	49.8952	198.496	297.628	207.284		1063.03	684.436	80.7861	234.469		1063.03	748.581	87.7829	239.156		ECM331	0.704197	0.0450848	0.0164095	0.0825782	0.00128223	0.00414756	0.224977	0.00267078	0.00271344
EFG1		1646.56	1753.28	2407.5	1	1	1	1226.7	2252.41	1362.67	2211.88	2352.17	2496.28		1819.73	1805.65	2407.5	1	1	1	1425.24	2252.41	1556.76	2468.17	2525.76	2496.28		2010.96	1	1744.8	2496.74		2010.96	1.09372	1895.92	2546.65		EFG1	0.000543879	0.000533473	0.000409875	0.942793	0.457931	0.0458007	1.26638	0.0711298	0.261434
ELF1		1057.56	1059.28	1230.5	301.506	432.598	469.075	353.699	411.408	507.675	1095.88	1086.17	840.284		1168.79	1090.92	1230.5	403.138	432.598	623.487	410.946	411.408	579.981	1222.86	1166.33	840.284		1163.4	486.408	467.445	1076.49		1163.4	531.993	507.93	1098.01		ELF1	0.457274	0.00106877	0.000669691	0.436591	0.000551562	0.247399	0.943794	0.527909	0.00173925
ENA2		2798.56	2755.28	3196.5	1145.51	2437.6	1438.07	3195.7	2840.41	2730.67	2889.88	3030.17	2975.28		3092.89	2837.58	3196.5	1531.63	2437.6	1911.47	3712.93	2840.41	3119.6	3224.73	3253.8	2975.28		3042.32	1960.23	3224.31	3151.27		3042.32	2143.94	3503.57	3214.26		ENA2	0.704706	0.0188261	0.00739597	1.15161	0.549103	0.228261	1.05652	0.475543	0.300261
ENA21		6191.56	6624.28	6962.5	1685.51	2679.6	1994.07	5238.7	6144.41	6325.67	8470.88	9856.17	8168.28		6842.73	6822.16	6962.5	2253.66	2679.6	2650.49	6086.6	6144.41	7226.62	9452.39	10583.5	8168.28		6875.8	2527.92	6485.88	9401.41		6875.8	2764.83	7047.61	9589.34		ENA21	0.402111	7.20376e-06	3.9622e-05	1.02499	0.355236	0.0193691	1.39465	0.0224995	0.211355
FAV2		176.562	193.277	182.498	1	10.5982	1.07474	120.699	126.408	73.6748	42.8847	47.1734	29.2839		195.131	199.051	182.498	1.33708	10.5982	1.42853	140.234	126.408	84.168	47.8537	50.6547	29.2839		192.226	4.45461	116.937	42.5974		192.226	4.87209	127.065	43.4489		FAV2	0.0253456	5.66788e-06	3.8288e-05	0.661015	0.012839	0.000370278	0.22603	5.73028e-05	0.0155714
FBP1		6480.56	7211.28	9464.5	2847.51	5663.6	3267.07	8294.7	7233.41	8072.67	14032.9	16110.2	9576.28		7162.12	7426.69	9464.5	3807.34	5663.6	4342.55	9637.22	7233.41	9222.44	15658.9	17299.1	9576.28		8017.77	4604.5	8697.69	14178.1		8017.77	5036.02	9450.99	14461.5		FBP1	0.628108	0.0201395	0.00784965	1.17876	0.548561	0.0434663	1.80368	0.0664068	0.300261
FDH1		3535.56	3828.28	3677.5	12601.5	20363.6	12417.1	8942.7	16076.4	7138.67	5461.88	8707.17	17774.3		3907.4	3942.64	3677.5	16849.2	20363.6	16504.6	10390.1	16076.4	8155.42	6094.74	9349.75	17774.3		3842.51	17905.8	11540.6	11072.9		3842.51	19583.9	12540.2	11294.3		FDH1	5.09665	0.000339978	0.000290172	3.26354	0.0309967	0.0638193	2.93929	0.106365	0.0311946
FGR15		177.562	225.277	209.498	197.506	362.598	295.075	187.699	178.408	112.675	239.885	257.173	278.284		196.236	232.007	209.498	264.082	362.598	392.209	218.079	178.408	128.723	267.68	276.152	278.284		212.58	339.63	175.07	274.039		212.58	371.459	190.232	279.517		FGR15	1.74738	0.033942	0.0128254	0.894874	0.249662	0.00581655	1.31488	0.00492057	0.161768
FKH2		149.562	165.277	174.498	262.506	425.598	248.075	104.699	126.408	119.675	244.885	230.173	208.284		165.292	170.214	174.498	350.992	425.598	329.737	121.645	126.408	136.72	273.259	247.16	208.284		170.001	368.776	128.257	242.901		170.001	403.337	139.366	247.756		FKH2	2.37256	0.00242951	0.00132154	0.819793	0.00129075	0.0166531	1.45738	0.0187137	0.00271344
FRP1		3956.56	4152.28	5663.5	4595.51	6337.6	5235.07	3909.7	3926.41	3256.67	5601.88	5764.17	6745.28		4372.67	4276.31	5663.5	6144.56	6337.6	6958.38	4542.5	3926.41	3720.51	6250.97	6189.56	6745.28		4770.83	6480.18	4063.14	6395.27		4770.83	7087.5	4415.04	6523.11		FRP1	1.48559	0.0285523	0.0109561	0.925425	0.238199	0.0229152	1.36729	0.027776	0.15708
FRP2		7071.56	7331.28	7562.5	2599.51	3827.6	3077.07	7280.7	7654.41	7424.67	8730.88	8842.17	9623.28		7815.28	7550.28	7562.5	3475.75	3827.6	4090	8459.1	7654.41	8482.15	9742.52	9494.71	9623.28		7642.68	3797.78	8198.55	9620.17		7642.68	4153.71	8908.62	9812.48		FRP2	0.543488	4.12924e-05	9.0628e-05	1.16564	0.12341	0.000370278	1.2839	6.07781e-05	0.0949156
FRP3		6535.56	7452.28	8470.5	1656.51	2939.6	1680.07	13324.7	18801.4	16633.7	5833.88	5463.17	10860.3		7222.91	7674.89	8470.5	2214.88	2939.6	2233.13	15481.3	18801.4	19002.8	6509.85	5866.35	10860.3		7789.43	2462.54	17761.8	7745.49		7789.43	2693.32	19300.2	7900.32		FRP3	0.345766	0.000257172	0.000254628	2.47774	0.00113991	0.414863	1.01424	0.979538	0.00269589
FTR1		5267.56	5503.28	7165.5	9121.51	9714.6	9012.07	5512.7	8104.41	8839.67	10647.9	11271.2	7413.28		5821.55	5667.67	7165.5	12196.2	9714.6	11978.7	6404.95	8104.41	10098.7	11881.6	12103	7413.28		6218.24	11296.5	8202.68	10466		6218.24	12355.2	8913.11	10675.2		FTR1	1.98693	0.00536564	0.00255382	1.43338	0.164722	0.0383804	1.71675	0.0566983	0.118952
GAL1		1927.56	2074.28	1791.5	3647.51	6505.6	3700.07	2334.7	2080.41	2798.67	3577.88	3694.17	3732.28		2130.28	2136.24	1791.5	4877.01	6505.6	4918.08	2712.58	2080.41	3197.28	3992.45	3966.8	3732.28		2019.34	5433.56	2663.42	3897.18		2019.34	5942.79	2894.1	3975.08		GAL1	2.94294	0.00338316	0.00170886	1.43319	0.133482	0.000689757	1.9685	0.000182894	0.10102
GAL4		1035.56	1124.28	1141.5	932.506	1120.6	901.075	1608.7	1609.41	1435.67	876.885	958.173	1248.28		1144.47	1157.86	1141.5	1246.84	1120.6	1197.69	1869.07	1609.41	1640.15	978.488	1028.89	1248.28		1147.94	1188.38	1706.21	1085.22		1147.94	1299.75	1853.98	1106.91		GAL4	1.13224	0.336833	0.103561	1.61505	0.00243976	0.234617	0.964256	0.491747	0.00397933
GAP2		1760.56	2072.28	1936.5	721.506	2094.6	1125.07	9724.7	12417.4	8416.67	3432.88	4241.17	6028.28		1945.72	2134.18	1936.5	964.712	2094.6	1495.43	11298.7	12417.4	9615.44	3830.65	4554.17	6028.28		2005.47	1518.25	11110.5	4804.37		2005.47	1660.54	12072.8	4900.4		GAP2	0.828005	0.216889	0.0701699	6.01994	0.000368684	0.0122945	2.44352	0.0125739	0.00134143
GCA2		443.562	461.277	299.498	339.506	600.598	363.075	324.699	336.408	291.675	269.885	293.173	391.284		490.212	475.056	299.498	453.947	600.598	482.593	377.252	336.408	333.217	301.156	314.809	391.284		421.589	512.38	348.959	335.75		421.589	560.399	379.182	342.461		GCA2	1.32926	0.297638	0.0932472	0.899413	0.311988	0.145191	0.812311	0.271316	0.190413
GCN4		1726.56	1743.28	1281.5	1189.51	1465.6	1267.07	1572.7	2100.41	1431.67	4766.88	5460.17	4283.28		1908.14	1795.35	1281.5	1590.47	1465.6	1684.18	1827.25	2100.41	1635.58	5319.22	5863.13	4283.28		1661.66	1580.08	1854.41	5155.21		1661.66	1728.16	2015.02	5258.26		GCN4	1.04002	0.70828	0.200342	1.21265	0.458754	0.00385499	3.16445	0.00223901	0.261434
GIS2		2792.56	2882.28	3020.5	3205.51	4370.6	3111.07	2094.7	2672.41	2427.67	3772.88	3666.17	4017.28		3086.26	2968.38	3020.5	4286.02	4370.6	4135.19	2433.73	2672.41	2773.44	4210.04	3936.73	4017.28		3025.04	4263.94	2626.53	4054.69		3025.04	4663.55	2854.01	4135.74		GIS2	1.54165	8.65184e-05	0.000138153	0.94346	0.0199835	0.000870182	1.36717	0.000304643	0.0217292
GNP1		6656.56	7244.28	9139.5	4778.51	6465.6	3823.07	3296.7	6415.41	4358.67	4831.88	4543.17	4930.28		7356.63	7460.68	9139.5	6389.25	6465.6	5081.57	3830.28	6415.41	4979.47	5391.75	4878.45	4930.28		7985.6	5978.81	5075.05	5066.83		7985.6	6539.13	5514.6	5168.11		GNP1	0.818865	0.0517816	0.0187094	0.690568	0.0369295	0.00909399	0.647179	0.00826726	0.0363909
GPD2		7142.56	7414.28	9552.5	914.506	885.598	903.075	3395.7	3642.41	3005.67	6694.88	6388.17	6210.28		7893.75	7635.76	9552.5	1222.77	885.598	1200.35	3945.3	3642.41	3433.76	7470.61	6859.61	6210.28		8360.67	1102.91	3673.83	6846.84		8360.67	1206.27	3992.01	6983.7		GPD2	0.144279	0.000286426	0.00026145	0.477475	0.0016276	0.0593015	0.835304	0.0973384	0.00306982
HAC1		1576.56	1683.28	1706.5	1210.51	1819.6	1502.07	1171.7	970.408	901.675	1406.88	1498.17	1352.28		1742.37	1733.56	1706.5	1618.54	1819.6	1996.53	1361.34	970.408	1030.1	1569.9	1608.74	1352.28		1727.48	1811.56	1120.62	1510.31		1727.48	1981.34	1217.67	1540.5		HAC1	1.14695	0.486206	0.141572	0.704885	0.00764348	0.037379	0.891762	0.0542751	0.0103296
HAP2		1074.56	1095.28	1277.5	723.506	1140.6	753.075	501.699	641.408	520.675	1193.88	1315.17	1277.28		1187.57	1128	1277.5	967.386	1140.6	1000.98	582.901	641.408	594.833	1332.22	1412.23	1277.28		1197.69	1036.32	606.381	1340.58		1197.69	1133.44	658.899	1367.38		HAP2	0.946358	0.0782036	0.0268825	0.550142	0.000229269	0.0458007	1.14168	0.0710391	0.00103817
HAP3		185.562	138.277	231.498	240.506	478.598	324.075	453.699	309.408	291.675	579.885	755.173	596.284		205.078	142.408	231.498	321.576	478.598	430.755	527.132	309.408	333.217	647.075	810.904	596.284		192.994	410.31	389.919	684.754		192.994	448.764	423.689	698.442		HAP3	2.32527	0.0152775	0.00619866	2.19535	0.0559808	0.00385499	3.61898	0.00215571	0.0512326
HAP43		1193.56	1317.28	1444.5	922.506	1526.6	1369.07	1566.7	1207.41	1048.67	1715.88	1836.17	1780.28		1319.09	1356.63	1444.5	1233.47	1526.6	1819.75	1820.27	1207.41	1198.03	1914.7	1971.68	1780.28		1373.4	1526.61	1408.57	1888.89		1373.4	1669.68	1530.57	1926.65		HAP43	1.21572	0.426567	0.127199	1.11443	0.874655	0.00335172	1.40283	0.00160815	0.447256
HEM1		391.562	385.277	377.498	196.506	254.598	189.075	129.699	207.408	191.675	343.885	291.173	292.284		432.743	396.786	377.498	262.745	254.598	251.315	150.691	207.408	218.974	383.73	312.662	292.284		402.342	256.219	192.358	329.559		402.342	280.232	209.018	336.146		HEM1	0.696502	0.000906331	0.000598158	0.519503	0.00139142	0.0540334	0.835474	0.0859622	0.00277247
HGT7		4365.56	4558.28	3357.5	100936	86173.6	87266.1	6152.7	5943.41	6348.67	12965.9	12184.2	13169.3		4824.69	4694.44	3357.5	134959	86173.6	115993	7148.53	5943.41	7252.9	14468.2	13083.3	13169.3		4292.21	112375	6781.61	13573.6		4292.21	122907	7368.96	13844.9		HGT7	28.6348	0.00160191	0.000932871	1.71682	0.016762	0.00060918	3.2256	0.000138447	0.0188772
HOG1		1086.56	1278.28	1244.5	1099.51	1771.6	1260.07	1240.7	1339.41	1161.67	1394.88	1446.17	1726.28		1200.84	1316.46	1244.5	1470.13	1771.6	1674.87	1441.51	1339.41	1327.13	1556.51	1552.9	1726.28		1253.93	1638.87	1369.35	1611.9		1253.93	1792.46	1487.95	1644.12		HOG1	1.42947	0.0154771	0.00622859	1.18663	0.0801269	0.00657169	1.31117	0.00572534	0.0682883
HSP104		1900.56	2106.28	2849.5	1778.51	2873.6	1564.07	1425.7	2096.41	1909.67	2195.88	2155.17	2469.28		2100.44	2169.2	2849.5	2378.01	2873.6	2078.94	1656.45	2096.41	2181.66	2450.32	2314.22	2469.28		2373.05	2443.52	1978.18	2411.27		2373.05	2672.52	2149.5	2459.48		HSP104	1.1262	0.842714	0.226708	0.905799	0.243854	0.382188	1.03642	0.883085	0.159094
HSP70		6626.56	7344.28	10138.5	4847.51	8956.6	4284.07	7197.7	6384.41	6864.67	4540.88	4253.17	6177.28		7323.48	7563.67	10138.5	6481.51	8956.6	5694.33	8362.67	6384.41	7842.39	5067.03	4567.05	6177.28		8341.88	7044.14	7529.82	5270.46		8341.88	7704.31	8181.98	5375.81		HSP70	0.92357	0.385516	0.115655	0.980831	0.493221	0.0294227	0.644436	0.0393788	0.274463
HTA1		8586.56	9399.28	7443.5	22614.5	34379.6	25156.1	2932.7	3212.41	1907.67	5287.88	6738.17	5886.28		9489.61	9680.05	7443.5	30237.4	34379.6	33437.1	3407.37	3212.41	2179.38	5900.58	7235.44	5886.28		8871.05	32684.7	2933.05	6340.77		8871.05	35747.9	3187.08	6467.52		HTA1	4.02972	7.90692e-05	0.000134964	0.359267	0.00185118	0.0296418	0.729059	0.0400464	0.00324299
HTA2		4982.56	5487.28	4353.5	12177.5	18607.6	13561.1	1654.7	1475.41	843.675	2692.88	3305.17	2924.28		5506.58	5651.19	4353.5	16282.3	18607.6	18025.2	1922.52	1475.41	963.837	3004.9	3549.09	2924.28		5170.42	17638.4	1453.92	3159.43		5170.42	19291.4	1579.84	3222.58		HTA2	3.73111	0.00010409	0.000147227	0.305554	0.00168743	0.0118147	0.623272	0.0115187	0.00306982
HWP1		37835.6	38984.3	31967.5	1	1	1	407.699	395.408	208.675	449.885	378.173	471.284		41814.7	40148.8	31967.5	1	1	1	473.686	395.408	238.396	502.012	406.082	471.284		37977	1	369.163	459.793		37977	1.09372	401.136	468.984		HWP1	2.87995e-05	0.000237114	0.000249712	0.0105626	0.000246583	0.000820743	0.0123491	0.000248713	0.00106029
HYR1		1312.56	1430.28	1637.5	1	38.5982	16.0747	22.6989	4.40797	7.67476	35.8847	63.1734	38.2839		1450.6	1473	1637.5	1	38.5982	21.3663	26.3728	4.40797	8.76785	40.0426	67.8355	38.2839		1520.37	20.3215	13.1829	48.7207		1520.37	22.226	14.3246	49.6946		HYR1	0.0146188	1.51093e-05	4.6181e-05	0.00942181	1.42327e-05	0.000318087	0.0326859	1.60648e-05	0.000134644
IFD6		238.562	270.277	188.498	388.506	544.598	409.075	102.699	79.408	80.6748	110.885	186.173	27.2839		263.652	278.351	188.498	519.464	544.598	543.736	119.321	79.408	92.165	123.733	199.913	27.2839		243.5	535.933	96.9647	116.976		243.5	586.16	105.363	119.315		IFD6	2.40723	0.000545604	0.000409875	0.432701	0.00833915	0.0565129	0.489999	0.0913341	0.0109567
IHD1		9368.56	10248.3	11705.5	1	1	1	5057.7	5112.41	5696.67	2669.88	3256.17	2813.28		10353.9	10554.4	11705.5	1	1	1	5876.3	5112.41	6508.04	2979.24	3496.47	2813.28		10871.3	1	5832.25	3096.33		10871.3	1.09372	6337.38	3158.23		IHD1	0.000100606	1.33808e-05	4.5606e-05	0.582948	0.000986891	0.000437563	0.290512	7.73467e-05	0.00252324
INO4		296.562	299.277	292.498	267.506	564.598	352.075	574.699	554.408	397.675	397.885	480.173	532.284		327.752	308.217	292.498	357.678	564.598	467.972	667.716	554.408	454.314	443.987	515.61	532.284		309.489	463.416	558.813	497.293		309.489	506.847	607.211	507.234		INO4	1.63769	0.0640905	0.0224999	1.96198	0.0162593	0.00434493	1.63894	0.00290759	0.0185317
IRE1		244.562	286.277	192.498	554.506	804.598	563.075	228.699	421.408	245.675	317.885	349.173	374.284		270.283	294.829	192.498	741.42	804.598	748.43	265.715	421.408	280.666	354.717	374.942	374.284		252.536	764.816	322.596	367.981		252.536	836.494	350.536	375.337		IRE1	3.31237	0.000153728	0.000185565	1.38806	0.296497	0.0188919	1.48627	0.021597	0.18435
IRO1		746.562	802.277	994.498	284.506	500.598	321.075	1260.7	1024.41	726.675	582.885	567.173	748.284		825.078	826.243	994.498	380.408	500.598	426.768	1464.75	1024.41	830.173	650.423	609.03	748.284		881.94	435.925	1106.44	669.245		881.94	476.779	1202.27	682.623		IRO1	0.540603	0.00253953	0.00133729	1.36321	0.315856	0.0290391	0.774003	0.0381322	0.191538
KIP4		998.562	973.277	1143.5	563.506	698.598	632.075	183.699	151.408	105.675	182.885	225.173	232.284		1103.58	1002.35	1143.5	753.453	698.598	840.144	213.431	151.408	120.726	204.075	241.791	232.284		1083.14	764.065	161.855	226.05		1083.14	835.673	175.873	230.569		KIP4	0.771526	0.00560723	0.00261846	0.162373	5.13749e-05	0.000328545	0.21287	3.91615e-05	0.000347148
KRE1		1103.56	1153.28	1033.5	45.5064	223.598	167.075	444.699	453.408	318.675	565.885	659.173	469.284		1219.62	1187.73	1033.5	60.8457	223.598	222.073	516.675	453.408	364.063	631.453	707.819	469.284		1146.95	168.839	444.715	602.852		1146.95	184.662	483.232	614.903		KRE1	0.161003	0.000242872	0.000250491	0.421319	0.000637247	0.00498767	0.53612	0.00390449	0.00188387
MAC1		120.562	123.277	108.498	1	82.5982	59.0747	119.699	93.408	73.6748	89.8847	123.173	115.284		133.242	126.96	108.498	1	82.5982	78.5212	139.073	93.408	84.168	100.3	132.263	115.284		122.9	54.0398	105.55	115.949		122.9	59.1044	114.691	118.267		MAC1	0.480916	0.0669037	0.023159	0.933209	0.402019	0.274392	0.962303	0.588972	0.233319
MAE1		612.562	678.277	794.498	1005.51	1695.6	1136.07	883.699	728.408	874.675	1261.88	1297.17	1171.28		676.985	698.539	794.498	1344.44	1695.6	1510.05	1026.73	728.408	999.252	1408.1	1392.9	1171.28		723.341	1516.7	918.13	1324.09		723.341	1658.84	997.648	1350.56		MAE1	2.29331	0.00180728	0.00104025	1.37922	0.128273	0.00385499	1.86712	0.00207972	0.0978602
MBF1		3789.56	4302.28	4435.5	3209.51	4923.6	3716.07	5465.7	4630.41	4111.67	6135.88	6422.17	6625.28		4188.11	4430.8	4435.5	4291.37	4923.6	4939.35	6350.34	4630.41	4697.29	6846.84	6896.12	6625.28		4351.47	4718.11	5226.01	6789.41		4351.47	5160.28	5678.63	6925.13		MBF1	1.18587	0.18389	0.0599688	1.30499	0.198726	0.000328545	1.59145	3.09881e-05	0.137223
MDM34		2819.56	3280.28	3006.5	1639.51	3977.6	1905.07	3361.7	3018.41	3232.67	3200.88	3385.17	2587.28		3116.1	3378.27	3006.5	2192.15	3977.6	2532.2	3905.8	3018.41	3693.1	3571.77	3634.99	2587.28		3166.95	2900.65	3539.1	3264.68		3166.95	3172.49	3845.62	3329.94		MDM34	1.00175	0.658287	0.188354	1.2143	0.267769	0.35491	1.05147	0.797651	0.171155
MET28		1122.56	1142.28	1064.5	512.506	821.598	573.075	1784.7	1852.41	1677.67	2571.88	3150.17	2323.28		1240.62	1176.4	1064.5	685.262	821.598	761.722	2073.56	1852.41	1916.62	2869.88	3382.65	2323.28		1160.51	756.194	1947.53	2858.61		1160.51	827.064	2116.2	2915.75		MET28	0.712675	0.00337078	0.00170886	1.82352	0.000704497	0.00630915	2.51248	0.00541695	0.00190416
NDT80		1060.56	1138.28	1262.5	627.506	1046.6	967.075	592.699	597.408	471.675	1253.88	1227.17	1121.28		1172.1	1172.28	1262.5	839.026	1046.6	1285.42	688.629	597.408	538.854	1399.17	1317.74	1121.28		1202.29	1057.02	608.297	1279.4		1202.29	1156.08	660.981	1304.97		NDT80	0.961561	0.334256	0.103411	0.549767	0.000359967	0.211247	1.0854	0.429429	0.00134143
NPR1		285.562	327.277	299.498	217.506	395.598	247.075	392.699	461.408	249.675	470.885	504.173	470.284		315.595	337.054	299.498	290.824	395.598	328.408	456.259	461.408	285.235	525.445	541.381	470.284		317.382	338.277	400.967	512.37		317.382	369.98	435.695	522.612		NPR1	1.16572	0.555504	0.159869	1.37278	0.228862	0.00272808	1.64663	0.00127448	0.153548
NRG1		1273.56	1326.28	1184.5	2346.51	2960.6	2759.07	2169.7	2973.41	2930.67	4050.88	4706.17	3542.28		1407.5	1365.9	1184.5	3137.47	2960.6	3667.32	2520.87	2973.41	3348.08	4520.25	5053.48	3542.28		1319.3	3255.13	2947.45	4372.01		1319.3	3560.2	3202.73	4459.4		NRG1	2.69855	0.000970736	0.000624021	2.4276	0.00281654	0.00391088	3.38013	0.00241961	0.00444074
PCK1		21033.6	23655.3	24151.5	3912.51	8851.6	3779.07	12745.7	19811.4	19948.7	31929.9	36437.2	18046.3		23245.7	24361.9	24151.5	5231.34	8851.6	5023.09	14808.6	19811.4	22789.9	35629.5	39126.2	18046.3		23919.7	6368.67	19136.6	30934		23919.7	6965.54	20794.1	31552.4		PCK1	0.291205	0.000168577	0.000198707	0.869328	0.11193	0.175426	1.3191	0.34332	0.0897341
PES1		125.562	131.277	176.498	1	45.5982	21.0747	45.6989	47.408	43.6748	63.8847	58.1734	64.2839		138.768	135.199	176.498	1	45.5982	28.0122	53.0954	47.408	49.8952	71.2869	62.4665	64.2839		150.155	24.8701	50.1329	66.0124		150.155	27.201	54.4748	67.332		PES1	0.181153	0.00248795	0.00133661	0.362792	0.00168019	0.00460506	0.448418	0.00335954	0.00306982
PFK2		1211.56	1310.28	1171.5	8417.51	7373.6	6995.07	1919.7	2747.41	2325.67	1627.88	1594.17	2282.28		1338.98	1349.42	1171.5	11254.9	7373.6	9297.75	2230.41	2747.41	2656.91	1816.5	1711.82	2282.28		1286.63	9308.74	2544.91	1936.87		1286.63	10181.1	2765.32	1975.59		PFK2	7.91302	0.00202416	0.00113861	2.14927	0.001758	0.020439	1.53547	0.0243819	0.00313786
PGA13		333.562	347.277	343.498	1	28.5982	14.0747	169.699	288.408	212.675	150.885	173.173	163.284		368.643	357.651	343.498	1	28.5982	18.7079	197.165	288.408	242.965	168.367	185.953	163.284		356.597	16.1021	242.846	172.535		356.597	17.6111	263.879	175.984		PGA13	0.0493866	6.18791e-06	3.8288e-05	0.739992	0.0141149	0.00037008	0.493509	5.14e-05	0.0166909
PGA17		297.562	293.277	343.498	1	5.59823	8.07474	6.69887	21.408	10.6748	29.8847	30.1734	236.284		328.857	302.038	343.498	1	5.59823	10.7328	7.78311	21.408	12.1951	33.3474	32.4001	236.284		324.797	5.77702	13.7954	100.677		324.797	6.31843	14.9902	102.69		PGA17	0.0194535	1.38234e-05	4.5606e-05	0.0461525	1.69475e-05	0.0242777	0.316165	0.0312667	0.000145753
PGA25		181.562	175.277	200.498	1	12.5982	7.07474	1	1	1	3.88472	7.17339	156.284		200.657	180.513	200.498	1	12.5982	9.40364	1	1	1	4.33483	7.70277	156.284		193.889	7.66729	1	56.1072		193.889	8.38586	1.08661	57.2287		PGA25	0.0432508	1.58645e-05	4.6181e-05	0.00560428	8.60414e-06	0.0369056	0.295162	0.0526557	0.000106162
PGA34		949.562	968.277	944.498	1613.51	2471.6	1650.07	44.6989	54.408	64.6748	215.885	272.173	219.284		1049.43	997.202	944.498	2157.39	2471.6	2193.25	51.9335	54.408	73.8862	240.899	292.259	219.284		997.042	2274.08	60.0759	250.814		997.042	2487.2	65.279	255.828		PGA34	2.49458	0.000250914	0.00025346	0.0654727	7.20749e-06	0.000328545	0.256587	3.65557e-05	0.000106162
PGA37		310.562	328.277	394.498	1	69.5982	28.0747	56.6989	73.408	21.6748	66.8847	91.1734	67.2839		343.224	338.083	394.498	1	69.5982	37.3165	65.8758	73.408	24.7618	74.6345	97.9019	67.2839		358.602	35.9716	54.6819	79.9401		358.602	39.3428	59.4178	81.5381		PGA37	0.109712	0.000272018	0.000256092	0.165693	0.000206639	0.000638114	0.227378	0.000161144	0.00102885
PGA48		1869.56	1877.28	1563.5	3013.51	4173.6	2890.07	940.699	1104.41	1040.67	1700.88	1519.17	1566.28		2066.18	1933.36	1563.5	4029.3	4173.6	3841.44	1092.95	1104.41	1188.9	1897.96	1631.29	1566.28		1854.35	4014.78	1128.75	1698.51		1854.35	4391.04	1226.51	1732.46		PGA48	2.36797	0.000267365	0.000256092	0.661426	0.00910502	0.214525	0.934272	0.438802	0.0116397
PGA53		1436.56	1489.28	1831.5	781.506	822.598	786.075	1088.7	1577.41	1314.67	1648.88	1678.17	2130.28		1587.65	1533.77	1831.5	1044.94	822.598	1044.84	1264.91	1577.41	1501.92	1839.94	1802.02	2130.28		1650.97	970.791	1448.08	1924.08		1650.97	1061.77	1573.5	1962.54		PGA53	0.643121	0.0044689	0.00216873	0.953074	0.197309	0.0703105	1.18872	0.119602	0.137223
PGA7		6483.56	6927.28	8266.5	5142.51	6394.6	5792.07	6486.7	7497.41	7084.67	9756.88	10163.2	10785.3		7165.44	7134.21	8266.5	6875.94	6394.6	7698.74	7536.59	7497.41	8093.72	10887.4	10913.2	10785.3		7522.05	6989.76	7709.24	10862		7522.05	7644.83	8376.93	11079.1		PGA7	1.01632	0.374106	0.112916	1.11365	0.6783	0.00200761	1.47288	0.000872799	0.354515
PHO89		4094.56	4448.28	2810.5	2241.51	2770.6	2080.07	1372.7	1940.41	1974.67	3274.88	4757.17	3891.28		4525.19	4581.16	2810.5	2997.07	2770.6	2764.8	1594.87	1940.41	2255.92	3654.34	5108.25	3891.28		3972.28	2844.16	1930.4	4217.96		3972.28	3110.71	2097.59	4302.27		PHO89	0.783104	0.126584	0.0422928	0.528057	0.0288836	0.33785	1.08307	0.755045	0.0296998
PHR1		4722.56	4863.28	7594.5	3237.51	3797.6	2797.07	2088.7	3188.41	2268.67	4752.88	5195.17	4792.28		5219.23	5008.55	7594.5	4328.81	3797.6	3717.83	2426.76	3188.41	2591.8	5303.59	5578.57	4792.28		5940.76	3948.08	2735.66	5224.82		5940.76	4318.09	2972.59	5329.26		PHR1	0.726858	0.0792381	0.0270502	0.500372	0.0204115	0.219717	0.897066	0.452195	0.0219424
PHR2		278.562	264.277	238.498	21.5064	77.5982	58.0747	54.6989	57.408	20.6748	223.885	342.173	317.284		307.859	272.172	238.498	28.7558	77.5982	77.1921	63.5521	57.408	23.6194	249.826	367.425	317.284		272.843	61.182	48.1932	311.512		272.843	66.9159	52.3671	317.739		PHR2	0.245255	0.00119693	0.000731439	0.191932	0.000675675	0.193331	1.16455	0.383244	0.00190416
PIL1		12218.6	13150.3	13320.5	8775.51	12588.6	9156.07	13780.7	16832.4	13506.7	14416.9	14890.2	18072.3		13503.6	13543.1	13320.5	11733.6	12588.6	12170.1	16011.2	16832.4	15430.4	16087.3	15989	18072.3		13455.7	12164.1	16091.3	16716.2		13455.7	13304.1	17485	17050.4		PIL1	0.988731	0.00727371	0.00324368	1.29944	0.00307851	0.00951921	1.26715	0.00877402	0.0047686
PIR1		2567.56	2465.28	2986.5	5364.51	8010.6	6075.07	4075.7	4298.41	4048.67	6957.88	7456.17	8122.28		2837.59	2538.92	2986.5	7172.78	8010.6	8074.9	4735.36	4298.41	4625.32	7764.08	8006.43	8122.28		2787.67	7752.76	4553.03	7964.27		2787.67	8479.34	4947.36	8123.47		PIR1	3.04173	9.94729e-05	0.000144817	1.77473	0.000685321	0.000177331	2.91407	6.71708e-06	0.00190416
PLB5		467.562	517.277	529.498	56.5064	152.598	111.075	235.699	207.408	207.675	423.885	521.173	566.284		516.736	532.729	529.498	75.5536	152.598	147.639	273.848	207.408	237.253	473	559.635	566.284		526.321	125.264	239.503	532.973		526.321	137.003	260.246	543.627		PLB5	0.260303	9.35704e-05	0.000140355	0.494463	0.00013265	0.366562	1.03288	0.837724	0.000738158
POL1		154.562	184.277	184.498	116.506	366.598	204.075	62.6989	79.408	42.6748	160.885	195.173	159.284		170.818	189.782	184.498	155.778	366.598	271.253	72.8469	79.408	48.7528	179.526	209.577	159.284		181.699	264.543	67.0026	182.796		181.699	289.336	72.8056	186.45		POL1	1.59239	0.247357	0.0789947	0.400694	0.000461032	0.405452	1.02615	0.947546	0.00150391
PRA1		57.5622	48.277	43.4975	1	65.5982	21.0747	149.699	220.408	219.675	239.885	161.173	180.284		63.6161	49.7192	43.4975	1	65.5982	28.0122	173.928	220.408	250.962	267.68	173.068	180.284		52.2776	31.5368	215.1	207.01		52.2776	34.4924	233.729	211.149		PRA1	0.659794	0.350777	0.106538	4.47092	0.00216105	0.00838959	4.03899	0.00752097	0.00358658
RBR1		36.5622	49.277	53.4975	1	1	1	1	1	1	1	1	1		40.4075	50.749	53.4975	1	1	1	1	1	1	1	1	1		48.218	1	1	1		48.218	1.09372	1.08661	1.01999		RBR1	0.0226828	0.000290475	0.00026145	0.0225353	0.000290475	0.000870182	0.0211537	0.000290475	0.00119476
RBR2		677.562	737.277	712.498	86.5064	210.598	157.075	159.699	175.408	160.675	267.885	384.173	986.284		748.821	759.301	712.498	115.666	210.598	208.781	185.547	175.408	183.559	298.924	412.525	986.284		740.207	178.349	181.505	565.911		740.207	195.063	197.225	577.223		RBR2	0.263525	8.22836e-05	0.000135762	0.266445	2.72209e-06	0.22192	0.779814	0.459531	0.000106162
RBT1		348.562	395.277	358.498	1	1	1	175.699	163.408	108.675	289.885	273.173	360.284		385.221	407.085	358.498	1	1	1	204.136	163.408	124.153	323.473	293.333	360.284		383.601	1	163.899	325.697		383.601	1.09372	178.094	332.207		RBT1	0.00285119	1.08116e-05	4.1161e-05	0.46427	0.00124602	0.0464355	0.866023	0.072702	0.00271344
RBT5		56791.6	59683.3	63232.5	40572.5	53606.6	40071.1	51073.7	82459.4	64501.7	91790.9	101091	102941		62764.3	61466.2	63232.5	54248.7	53606.6	53261.9	59340.2	82459.4	73688.5	102427	108552	102941		62487.7	53705.7	71829.3	104640		62487.7	58739	78050.4	106732		RBT5	0.940009	0.000128676	0.000172136	1.24905	0.239107	0.000328545	1.70804	3.18701e-05	0.15708
RCT1		8896.56	9828.28	13581.5	793.506	1004.6	790.075	8164.7	10723.4	7235.67	6760.88	7196.17	9094.28		9832.21	10121.9	13581.5	1060.98	1004.6	1050.16	9486.18	10723.4	8266.23	7544.26	7727.24	9094.28		11178.5	1038.58	9491.94	8121.93		11178.5	1135.91	10314	8284.28		RCT1	0.101616	0.0010901	0.000674499	0.922665	0.29405	0.0496699	0.741089	0.0783931	0.18422
RFG1		857.562	863.277	639.498	2465.51	3683.6	3189.07	1038.7	1043.41	904.675	1178.88	1267.17	1042.28		947.752	889.065	639.498	3296.58	3683.6	4238.87	1206.82	1043.41	1033.53	1315.48	1360.69	1042.28		825.438	3739.68	1094.58	1239.48		825.438	4090.16	1189.38	1264.26		RFG1	4.95514	0.00054649	0.000409875	1.44091	0.070596	0.0294227	1.53162	0.0392438	0.0612695
RFX2		305.562	309.277	393.498	1	32.5982	22.0747	132.699	79.408	67.6748	100.885	94.1734	129.284		337.698	318.516	393.498	1	32.5982	29.3414	154.177	79.408	77.3135	112.574	101.123	129.284		349.904	20.9799	103.633	114.327		349.904	22.9461	112.608	116.612		RFX2	0.0655783	0.000181677	0.000209166	0.321826	0.00189319	0.00152552	0.33327	0.00059711	0.00325629
RHR2		11146.6	11343.3	12908.5	2343.51	2521.6	1998.07	1954.7	2923.41	1781.67	8844.88	8265.17	7409.28		12318.8	11682.1	12908.5	3133.46	2521.6	2655.81	2271.07	2923.41	2035.43	9869.73	8875.13	7409.28		12303.2	2770.29	2409.97	8718.05		12303.2	3029.92	2618.7	8892.32		RHR2	0.246272	1.83528e-05	4.7807e-05	0.212848	2.37254e-05	0.0113189	0.722767	0.0108616	0.000187032
RIM101		3049.56	3355.28	4197.5	1170.51	1886.6	1288.07	2043.7	2557.41	1943.67	3065.88	3117.17	2784.28		3370.28	3455.51	4197.5	1565.06	1886.6	1712.09	2374.48	2557.41	2220.51	3421.12	3347.22	2784.28		3674.43	1721.25	2384.13	3184.21		3674.43	1882.56	2590.62	3247.86		RIM101	0.512342	0.00218087	0.00121297	0.70504	0.00998828	0.116885	0.883908	0.212518	0.0124328
RNR22		291.562	339.277	379.498	3249.51	2320.6	2928.07	286.699	206.408	203.675	319.885	292.173	269.284		322.226	349.412	379.498	4344.85	2320.6	3891.95	333.102	206.408	232.684	356.949	313.735	269.284		350.378	3519.13	257.398	313.323		350.378	3848.94	279.691	319.586		RNR22	10.9851	0.0066781	0.0030608	0.798254	0.0912297	0.15077	0.912117	0.287555	0.075705
ROB1		1474.56	1666.28	1506.5	5299.51	6221.6	6009.07	1	1	1	2609.88	2886.17	2910.28		1629.64	1716.05	1506.5	7085.87	6221.6	7987.17	1	1	1	2912.29	3099.17	2910.28		1617.4	7098.21	1	2973.91		1617.4	7763.45	1.08661	3033.36		ROB1	4.79996	0.000435883	0.000348017	0.000671826	1.19002e-05	0.000495446	1.87546	0.000100094	0.000125082
RPN4		815.562	827.277	916.498	1263.51	1705.6	1303.07	619.699	788.408	729.675	2279.88	2653.17	1922.28		901.335	851.99	916.498	1689.41	1705.6	1732.03	719.999	788.408	833.6	2544.05	2848.97	1922.28		889.941	1709.01	780.669	2438.44		889.941	1869.18	848.282	2487.18		RPN4	2.10034	3.77422e-06	3.7363e-05	0.95319	0.0463781	0.00574704	2.79477	0.0047892	0.0430134
RTA3		10.5622	3.27702	1	1	1	1	6.69887	9.40797	7.67476	49.8847	47.1734	42.2839		11.6731	3.37491	1	1	1	1	7.78311	9.40797	8.76785	55.6648	50.6547	42.2839		5.34933	1	8.65298	49.5345		5.34933	1.09372	9.40241	50.5246		RTA3	0.204459	0.250024	0.0793344	1.75768	0.369463	0.00209999	9.44504	0.000954536	0.217686
SAP1		20.5622	32.277	1	1	49.5982	8.07474	24.6989	19.408	15.6748	53.8847	49.1734	30.2839		22.7248	33.2412	1	1.33708	49.5982	10.7328	28.6965	19.408	17.9073	60.1282	52.8023	30.2839		18.9887	20.556	22.0039	47.7381		18.9887	22.4825	23.9096	48.6924		SAP1	1.184	0.933165	0.247014	1.25915	0.779626	0.0568756	2.56429	0.0926383	0.400829
SAP10		64.5622	92.277	81.4975	90.5064	169.598	119.075	91.6989	91.408	68.6748	172.885	186.173	244.284		71.3522	95.0335	81.4975	121.014	169.598	158.272	106.541	91.408	78.4559	192.917	199.913	244.284		82.6278	149.628	92.1348	212.371		82.6278	163.651	100.115	216.616		SAP10	1.98058	0.0144246	0.00595015	1.21163	0.421524	0.00348609	2.62159	0.00176065	0.243147
SAP2		13.5622	7.27702	1	1	1	1	1	1	1	1	1	1		14.9886	7.4944	1	1	1	1	1	1	1	1	1	1		7.82766	1	1	1		7.82766	1.09372	1.08661	1.01999		SAP2	0.139725	0.16642	0.0549185	0.138817	0.16642	0.0925032	0.130306	0.16642	0.119268
SAP4		101.562	81.277	58.4975	1	1	1	1	1	1	5.88472	25.1734	4.28386		112.244	83.7049	58.4975	1	1	1	1	1	1	6.56657	27.0311	4.28386		84.8153	1	1	12.6272		84.8153	1.09372	1.08661	12.8796		SAP4	0.0128953	0.00569709	0.00263557	0.0128115	0.00569709	0.0130707	0.151855	0.0135328	0.00829146
SAP5		2194.56	2425.28	3218.5	1	1	1	51.6989	29.408	11.6748	40.8847	58.1734	66.2839		2425.36	2497.73	3218.5	1	1	1	60.0665	29.408	13.3376	45.622	62.4665	66.2839		2713.86	1	34.2707	58.1241		2713.86	1.09372	37.2388	59.286		SAP5	0.000403012	0.00042989	0.000348017	0.0137217	0.000453579	0.00123425	0.0218456	0.000467516	0.00150391
SAP6		549.562	532.277	653.498	1	1	1	1	1	1	8.88472	12.1734	9.28386		607.36	548.177	653.498	1	1	1	1	1	1	9.91417	13.0718	9.28386		603.012	1	1	10.7566		603.012	1.09372	1.08661	10.9716		SAP6	0.00181376	3.87668e-05	9.0628e-05	0.00180197	3.87668e-05	0.000328545	0.0181947	4.14832e-05	0.000282104
SAP9		2881.56	3209.28	3181.5	990.506	1443.6	943.075	1287.7	2094.41	1589.67	2993.88	3062.17	3342.28		3184.62	3305.15	3181.5	1324.39	1443.6	1253.52	1496.12	2094.41	1816.09	3340.78	3288.16	3342.28		3223.75	1340.5	1802.2	3323.74		3223.75	1466.13	1958.29	3390.18		SAP9	0.454791	1.05897e-05	4.1161e-05	0.607457	0.00132067	0.0546192	1.05163	0.0875838	0.00271599
SCW11		820.562	965.277	659.498	2176.51	3518.6	2554.07	1526.7	1276.41	1304.67	1791.88	1866.17	2296.28		906.861	994.112	659.498	2910.16	3518.6	3394.84	1773.8	1276.41	1490.5	1999.51	2003.89	2296.28		853.49	3274.53	1513.57	2099.9		853.49	3581.42	1644.66	2141.87		SCW11	4.1962	0.000329147	0.000288142	1.92698	0.0197473	0.00200761	2.50954	0.000887198	0.0217221
SCW4		294.562	311.277	383.498	1	1	1	21.6989	1	2.67476	1	24.1734	276.284		325.541	320.576	383.498	1	1	1	25.2109	1	3.05572	1	25.9574	276.284		343.205	1	9.75554	101.08		343.205	1.09372	10.6005	103.101		SCW4	0.00318678	7.11477e-05	0.000130442	0.0308867	0.00010338	0.0375257	0.300407	0.0549619	0.000651983
SEF1		1588.56	1649.28	1443.5	1049.51	1699.6	1492.07	634.699	523.408	608.675	1517.88	1615.17	1494.28		1755.63	1698.54	1443.5	1403.27	1699.6	1983.24	737.427	523.408	695.367	1693.76	1734.37	1494.28		1632.56	1695.37	652.067	1640.8		1632.56	1854.26	708.542	1673.6		SEF1	1.1358	0.761125	0.211661	0.434007	0.00107902	0.405452	1.02514	0.949055	0.00268619
SEF2		415.562	443.277	496.498	50.5064	267.598	171.075	516.699	464.408	221.675	222.885	312.173	470.284		459.267	456.519	496.498	67.5311	267.598	227.39	600.328	464.408	253.247	248.71	335.211	470.284		470.761	187.506	439.328	351.402		470.761	205.079	477.378	358.426		SEF2	0.435634	0.010529	0.00453205	1.01406	0.772897	0.0818489	0.761376	0.143649	0.399541
SGA1		482.562	475.277	444.498	82.5064	305.598	150.075	379.699	400.408	336.675	322.885	491.173	344.284		533.313	489.475	444.498	110.318	305.598	199.477	441.154	400.408	384.626	360.297	527.421	344.284		489.095	205.131	408.73	410.667		489.095	224.356	444.129	418.876		SGA1	0.458716	0.0101795	0.00442005	0.908063	0.058808	0.15077	0.856431	0.287157	0.0529832
SIN3		869.562	912.277	1102.5	1234.51	1991.6	1291.07	1203.7	1153.41	1154.67	1250.88	1339.17	1518.28		961.014	939.529	1102.5	1650.63	1991.6	1716.08	1398.52	1153.41	1319.13	1395.82	1438	1518.28		1001.01	1786.1	1290.35	1450.7		1001.01	1953.49	1402.11	1479.7		SIN3	1.95152	0.00251117	0.00133661	1.40069	0.0307752	0.00381402	1.4782	0.00197443	0.0311946
SIT1		2274.56	2329.28	2162.5	484.506	565.598	632.075	1892.7	1981.41	2011.67	3776.88	4372.17	3374.28		2513.78	2398.86	2162.5	647.824	565.598	840.144	2199.04	1981.41	2298.19	4214.51	4694.83	3374.28		2358.38	684.522	2159.55	4094.54		2358.38	748.675	2346.58	4176.39		SIT1	0.317453	0.000219904	0.00024189	0.994999	0.227052	0.0120764	1.77087	0.0121983	0.153422
SMC2		134.562	115.277	162.498	216.506	495.598	314.075	141.699	122.408	65.6748	179.885	169.173	224.284		148.714	118.721	162.498	289.486	495.598	417.463	164.633	122.408	75.0286	200.728	181.658	224.284		143.311	400.849	120.69	202.223		143.311	438.417	131.143	206.266		SMC2	3.0592	0.0137956	0.00573851	0.915094	0.477929	0.0237383	1.43929	0.0299726	0.26912
SOD4		348.562	382.277	236.498	414.506	698.598	494.075	428.699	621.408	1051.67	2000.88	852.173	816.284		385.221	393.696	236.498	554.228	698.598	656.717	498.085	621.408	1201.46	2232.72	915.063	816.284		338.472	636.514	773.652	1321.36		338.472	696.168	840.657	1347.77		SOD4	2.0568	0.0110698	0.00472375	2.48369	0.12247	0.0599464	3.98193	0.0991538	0.0949156
SOD5		25247.6	26888.3	34605.5	3043.51	5994.6	3383.07	16552.7	19528.4	14266.7	14319.9	11834.2	12467.3		27902.8	27691.5	34605.5	4069.41	5994.6	4496.73	19231.8	19528.4	16298.6	15979.1	12707.5	12467.3		30066.6	4853.58	18353	13718		30066.6	5308.45	19942.5	13992.2		SOD5	0.176556	0.000423577	0.000348017	0.663277	0.00932167	0.00437757	0.465373	0.00298471	0.0117577
SOD6		553.562	630.277	831.498	447.506	757.598	481.075	237.699	264.408	209.675	360.885	361.173	402.284		611.78	649.105	831.498	598.352	757.598	639.437	276.171	264.408	239.538	402.7	387.827	402.284		697.461	665.129	260.039	397.604		697.461	727.464	282.561	405.552		SOD6	1.04302	0.716667	0.201563	0.405128	0.0031253	0.0118147	0.581469	0.0116357	0.0047686
SOG2		234.562	243.277	262.498	243.506	553.598	309.075	207.699	231.408	172.675	277.885	316.173	315.284		259.231	250.544	262.498	325.588	553.598	410.817	241.316	231.408	197.268	310.083	339.507	315.284		257.424	430.001	223.331	321.624		257.424	470.3	242.673	328.054		SOG2	1.82695	0.0606338	0.0214384	0.942697	0.0690372	0.00418357	1.27437	0.00274679	0.0604715
SSB1		4952.56	5277.28	6185.5	2946.51	4831.6	3612.07	3117.7	3723.41	3348.67	4019.88	3345.17	2906.28		5473.42	5434.92	6185.5	3939.72	4831.6	4801.11	3622.31	3723.41	3825.62	4485.66	3592.04	2906.28		5697.95	4524.14	3723.78	3661.33		5697.95	4948.14	4046.29	3734.52		SSB1	0.868408	0.0368458	0.0137133	0.710131	0.00141192	0.0155758	0.655415	0.0171098	0.00277247
STF2		26412.6	28402.3	33206.5	30070.5	52476.6	33298.1	40689.7	35137.4	31181.7	26411.9	24521.2	30683.3		29190.4	29250.7	33206.5	40206.7	52476.6	44259.3	47275.5	35137.4	35622.8	29472.2	26330.8	30683.3		30549.2	45647.5	39345.2	28828.8		30549.2	49925.6	42752.9	29405		STF2	1.63427	0.0171678	0.00685327	1.39948	0.103396	0.203817	0.962547	0.406604	0.0836002
STP2		2027.56	2065.28	2075.5	2772.51	4313.6	2927.07	1803.7	2091.41	1832.67	2213.88	2417.17	2127.28		2240.8	2126.97	2075.5	3707.06	4313.6	3890.62	2095.63	2091.41	2093.7	2470.4	2595.56	2127.28		2147.76	3970.43	2093.58	2397.75		2147.76	4342.53	2274.9	2445.68		STP2	2.02189	0.000609164	0.000424724	1.0592	0.32962	0.0925032	1.13871	0.16702	0.198612
SUT1		266.562	310.277	218.498	743.506	655.598	585.075	364.699	233.408	378.675	369.885	365.173	447.284		294.597	319.546	218.498	994.128	655.598	777.672	423.727	233.408	432.608	412.743	392.123	447.284		277.547	809.133	363.248	417.383		277.547	884.964	394.708	425.726		SUT1	3.18852	0.00681978	0.00307179	1.42213	0.298155	0.0142255	1.53389	0.0152673	0.18435
TEC1		2010.56	1988.28	2016.5	89.5064	242.598	194.075	1656.7	1496.41	2005.67	2123.88	2380.17	1428.28		2222.01	2047.67	2016.5	119.677	242.598	257.961	1924.84	1496.41	2291.34	2369.98	2555.83	1428.28		2095.39	206.746	1904.2	2118.03		2095.39	226.122	2069.12	2160.37		TEC1	0.107914	1.68099e-05	4.6228e-05	0.987459	0.467564	0.405452	1.03101	0.952198	0.26486
TPK1		653.562	746.277	570.498	364.506	518.598	421.075	216.699	242.408	243.675	716.885	787.173	498.284		722.297	768.57	570.498	487.374	518.598	559.686	251.772	242.408	278.381	799.949	845.266	498.284		687.122	521.886	257.52	714.5		687.122	570.797	279.824	728.782		TPK1	0.830707	0.059607	0.021227	0.407241	0.00211459	0.366562	1.06063	0.836387	0.00357215
TPK2		780.562	727.277	576.498	1895.51	2674.6	1771.07	966.699	1242.41	862.675	928.885	1022.17	1195.28		862.654	749.002	576.498	2534.44	2674.6	2354.09	1123.16	1242.41	985.543	1036.51	1097.61	1195.28		729.385	2521.04	1117.04	1109.8		729.385	2757.31	1213.78	1131.99		TPK2	3.78033	0.000135942	0.000172136	1.66412	0.0254131	0.0148903	1.55197	0.0161688	0.0264185
TPS2		4413.56	5005.28	5841.5	2005.51	2975.6	2213.07	5348.7	4046.41	3828.67	2673.88	2457.17	3119.28		4877.74	5154.8	5841.5	2681.52	2975.6	2941.58	6214.4	4046.41	4373.98	2983.7	2638.51	3119.28		5291.34	2866.24	4878.26	2913.83		5291.34	3134.86	5300.77	2972.08		TPS2	0.59245	0.00129113	0.000769993	1.00178	0.603168	0.00348609	0.561687	0.0017568	0.322968
TRR1		1218.56	1388.28	1838.5	805.506	1273.6	1095.07	1148.7	942.408	936.675	1847.88	1796.17	1953.28		1346.72	1429.75	1838.5	1077.03	1273.6	1455.56	1334.62	942.408	1070.08	2062	1928.73	1953.28		1538.32	1268.73	1115.7	1981.34		1538.32	1387.63	1212.33	2020.94		TRR1	0.902042	0.223269	0.071765	0.788089	0.0912302	0.0346324	1.31373	0.0481005	0.075705
TRX1		3047.56	3073.28	2559.5	5668.51	6941.6	4704.07	3556.7	6215.41	4207.67	6073.88	6029.17	7363.28		3368.07	3165.08	2559.5	7579.25	6941.6	6252.58	4132.36	6215.41	4806.96	6777.66	6474.12	7363.28		3030.88	6924.48	5051.58	6871.69		3030.88	7573.43	5489.09	7009.05		TRX1	2.49875	0.00101166	0.00064204	1.81105	0.0375892	0.00114925	2.31254	0.000420806	0.0366592
TTR1		1217.56	1328.28	1275.5	556.506	930.598	615.075	1052.7	1605.41	1213.67	1725.88	1782.17	2042.28		1345.61	1367.96	1275.5	744.094	930.598	817.548	1223.08	1605.41	1386.53	1925.86	1913.7	2042.28		1329.69	830.747	1405.01	1960.61		1329.69	908.603	1526.69	1999.81		TTR1	0.68332	0.00121483	0.000733324	1.14816	0.545596	0.000754948	1.50396	0.000219238	0.300261
TUP1		633.562	744.277	756.498	1497.51	2134.6	1530.07	898.699	1314.41	952.675	1102.88	1241.17	1382.28		700.194	766.51	756.498	2002.29	2134.6	2033.75	1044.16	1314.41	1088.36	1230.67	1332.77	1382.28		741.067	2056.88	1148.98	1315.24		741.067	2249.65	1248.49	1341.53		TUP1	3.03569	8.09294e-06	4.006e-05	1.68472	0.00909078	0.000870182	1.81027	0.000307637	0.0116397
TYE7		2793.56	2964.28	2586.5	2678.51	2697.6	2605.07	2409.7	2011.41	2832.67	3929.88	4310.17	4053.28		3087.36	3052.83	2586.5	3581.38	2697.6	3462.63	2799.72	2011.41	3236.12	4385.23	4628.26	4053.28		2908.9	3247.2	2682.42	4355.59		2908.9	3551.52	2914.74	4442.66		TYE7	1.22092	0.350822	0.106538	1.00201	0.595378	0.00460506	1.52727	0.00337301	0.321844
UCF1		34365.6	36516.3	28164.5	84012.5	102733	82038.1	50572.7	50906.4	48359.7	30297.9	30489.2	35293.3		37979.8	37607.1	28164.5	112331	102733	109044	58758.1	50906.4	55247.4	33808.4	32739.2	35293.3		34583.8	108036	54970.6	33947		34583.8	118161	59731.6	34625.6		UCF1	3.41666	6.70993e-05	0.000127748	1.72716	0.00659139	0.372588	1.00121	0.8562	0.00903689
UGA32		150.562	143.277	192.498	21.5064	100.598	55.0747	285.699	313.408	226.675	149.885	155.173	195.284		166.397	147.557	192.498	28.7558	100.598	73.2045	331.94	313.408	258.959	167.252	166.625	195.284		168.817	67.5195	301.436	176.387		168.817	73.8474	327.543	179.913		UGA32	0.43744	0.0147526	0.00603516	1.94022	0.0064986	0.303362	1.06573	0.662646	0.00903689
UGP1		2981.56	3195.28	4168.5	1924.51	2677.6	1995.07	3791.7	3839.41	3362.67	3372.88	3356.17	4113.28		3295.13	3290.73	4168.5	2573.22	2677.6	2651.82	4405.4	3839.41	3841.61	3763.7	3603.85	4113.28		3584.79	2634.21	4028.81	3826.94		3584.79	2881.09	4377.74	3903.44		UGP1	0.803699	0.0317254	0.0120801	1.2212	0.270252	0.23653	1.08889	0.50173	0.171583
UME6		204.562	235.277	198.498	1	1	1	15.6989	18.408	1	26.8847	33.1734	15.2839		226.076	242.305	198.498	1	1	1	18.2398	18.408	1	29.9998	35.6215	15.2839		222.293	1	12.5493	26.9684		222.293	1.09372	13.6361	27.5075		UME6	0.00492017	6.54236e-05	0.000127748	0.0613431	0.000116636	0.000638114	0.123744	0.000159701	0.000689634
UPC2		149.562	192.277	162.498	664.506	610.598	500.075	133.699	118.408	116.675	129.885	148.173	153.284		165.292	198.021	162.498	888.498	610.598	664.692	155.338	118.408	133.292	144.934	159.108	153.284		175.27	721.263	135.68	152.442		175.27	788.859	147.431	155.489		UPC2	4.50082	0.00312963	0.0016137	0.841164	0.0647565	0.0762267	0.887142	0.132819	0.0577921
WH11		22900.6	25348.3	23746.5	55.5064	150.598	88.0747	12939.7	19229.4	17662.7	18604.9	17174.2	30403.3		25309	26105.5	23746.5	74.2165	150.598	117.068	15034	19229.4	20178.3	20760.6	18441.6	30403.3		25053.7	113.961	18147.3	23201.8		25053.7	124.641	19719	23665.6		WH11	0.00497496	3.56275e-06	3.7363e-05	0.787069	0.0161026	0.297176	0.944597	0.645382	0.0185317
YHB1		10245.6	10446.3	10483.5	826.506	2096.6	778.075	2277.7	2535.41	1935.67	796.885	629.173	1324.28		11323.1	10758.3	10483.5	1105.11	2096.6	1034.2	2646.35	2535.41	2211.37	889.218	675.606	1324.28		10855	1411.97	2464.38	963.036		10855	1544.3	2677.81	982.287		YHB1	0.142266	2.37718e-05	5.8831e-05	0.24669	7.33077e-06	0.000177331	0.0904919	5.91835e-06	0.000106162
YWP1		170.562	163.277	167.498	9048.51	11165.6	8773.07	8583.7	9852.41	11090.7	8709.88	9463.17	6278.28		188.5	168.154	167.498	12098.6	11165.6	11661	9973	9852.41	12670.3	9719.08	10161.5	6278.28		174.717	11641.7	10831.9	8719.64		174.717	12732.8	11770	8893.94		YWP1	72.8765	1.82626e-06	3.7363e-05	67.3662	0.00031713	0.00385499	50.9047	0.00223725	0.00125002
ZAP1		37.5622	45.277	53.4975	1	65.5982	36.0747	80.6989	85.408	77.6748	42.8847	59.1734	62.2839		41.5127	46.6295	53.4975	1	65.5982	47.95	93.7603	85.408	88.7378	47.8537	63.5403	62.2839		47.2133	38.1827	89.302	57.8926		47.2133	41.7612	97.0364	59.0499		ZAP1	0.884523	0.668719	0.190239	2.05528	0.000576418	0.0874097	1.25071	0.155616	0.00175901
ZCF20		415.562	391.277	356.498	512.506	714.598	638.075	342.699	472.408	300.675	533.885	599.173	671.284		459.267	402.965	356.498	685.262	714.598	848.119	398.166	472.408	343.499	595.745	643.392	671.284		406.243	749.327	404.691	636.807		406.243	819.553	439.741	649.536		ZCF20	2.01739	0.00415823	0.00204009	1.08246	0.975614	0.00460506	1.59889	0.00337893	0.490921
ZCF3		1191.56	1226.28	1013.5	782.506	1301.6	1368.07	702.699	449.408	775.675	1330.88	1488.17	1381.28		1316.88	1262.91	1013.5	1046.27	1301.6	1818.42	816.433	449.408	886.152	1485.09	1598	1381.28		1197.76	1388.77	717.331	1488.12		1197.76	1518.92	779.458	1517.87		ZCF3	1.26813	0.480163	0.141477	0.650763	0.0432699	0.0403934	1.26726	0.0612021	0.0409333
ZCF31		80.5622	107.277	75.4975	401.506	603.598	382.075	51.6989	117.408	55.6748	115.885	111.173	102.284		89.035	110.482	75.4975	536.846	603.598	507.848	60.0665	117.408	63.6044	129.312	119.378	102.284		91.6714	549.431	80.3596	116.991		91.6714	600.923	87.3195	119.33		ZCF31	6.55519	0.00010932	0.000150288	0.952527	0.621335	0.0703806	1.30171	0.120856	0.330215
ZCF34		111.562	113.277	89.4975	60.5064	161.598	104.075	161.699	127.408	84.6748	143.885	156.173	166.284		123.295	116.661	89.4975	80.9019	161.598	138.335	187.87	127.408	96.7347	160.556	167.699	166.284		109.818	126.945	137.338	164.846		109.818	138.842	149.232	168.142		ZCF34	1.26429	0.547738	0.158556	1.35891	0.39192	0.00733472	1.53109	0.00648271	0.228862
ZCF39		820.562	869.277	987.498	405.506	619.598	402.075	776.699	1027.41	809.675	837.885	972.173	995.284		906.861	895.244	987.498	542.195	619.598	534.432	902.41	1027.41	924.994	934.969	1043.92	995.284		929.868	565.408	951.604	991.39		929.868	618.398	1034.02	1011.21		ZCF39	0.665038	0.000786264	0.000533176	1.11201	0.675209	0.121641	1.08748	0.224238	0.354515
ZCF7		104.562	84.277	57.4975	20.5064	125.598	59.0747	81.6989	61.408	48.6748	78.8847	79.1734	86.2839		115.559	86.7946	57.4975	27.4187	125.598	78.5212	94.9221	61.408	55.6074	88.025	85.0163	86.2839		86.6171	77.1794	70.6458	86.4417		86.6171	84.4126	76.7644	88.1696		ZCF7	0.974549	0.788678	0.214503	0.88625	0.484656	0.417976	1.01792	0.992164	0.271293
ZRT1		72.5622	67.277	72.4975	1	22.5982	8.07474	111.699	130.408	147.675	157.885	98.1734	116.284		80.1936	69.2867	72.4975	1	22.5982	10.7328	129.778	130.408	168.708	176.179	105.418	116.284		73.9926	11.4437	142.964	132.627		73.9926	12.5162	155.346	135.278		ZRT1	0.169154	0.000883567	0.000591057	2.09949	0.00653298	0.0387783	1.82826	0.0577758	0.00903689
ZRT2		199.562	232.277	299.498	18.5064	134.598	60.0747	937.699	1021.41	575.675	372.885	484.173	331.284		220.55	239.216	299.498	24.7445	134.598	79.8504	1089.47	1021.41	657.666	416.09	519.905	331.284		253.088	79.7311	922.848	422.426		253.088	87.2034	1002.77	430.87		ZRT2	0.344558	0.0119612	0.00501762	3.96216	0.0079312	0.0341899	1.70245	0.0466226	0.0105675
orf19.1424		298.562	298.277	330.498	186.506	409.598	263.075	407.699	374.408	272.675	349.885	438.173	519.284		329.962	307.187	330.498	249.374	409.598	349.675	473.686	374.408	311.511	390.425	470.51	519.284		322.549	336.216	386.535	460.073		322.549	367.726	420.013	469.27		orf19.1424	1.14006	0.787275	0.214503	1.30217	0.251944	0.0196078	1.45488	0.0230243	0.162136
orf19.1534		103.562	79.277	38.4975	22.5064	115.598	56.0747	88.6989	190.408	133.675	123.885	161.173	174.284		114.454	81.6452	38.4975	30.0929	115.598	74.5337	103.055	190.408	152.714	138.239	173.068	174.284		78.1989	73.4083	148.726	161.864		78.1989	80.288	161.607	165.099		orf19.1534	1.02672	0.891811	0.237337	2.06661	0.103186	0.0230696	2.11127	0.0285457	0.0836002
orf19.1691		63.5622	65.277	1	805.506	372.598	728.075	5.69887	9.40797	5.67476	18.8847	31.1734	21.2839		70.2471	67.227	1	1077.03	372.598	967.746	6.62125	9.40797	6.483	21.0729	33.4739	21.2839		46.158	805.79	7.50408	25.2769		46.158	881.308	8.154	25.7822		orf19.1691	19.0933	0.0260028	0.0100558	0.176654	0.162603	0.205647	0.558563	0.414638	0.118325
orf19.1862		4616.56	5165.28	5439.5	656.506	1034.6	793.075	6852.7	6989.41	8081.67	5063.88	4945.17	7019.28		5102.09	5319.58	5439.5	877.802	1034.6	1054.14	7961.83	6989.41	9232.72	5650.63	5310.12	7019.28		5287.05	988.848	8061.32	5993.34		5287.05	1081.52	8759.51	6113.15		orf19.1862	0.20456	2.89664e-06	3.7363e-05	1.65678	0.0134465	0.13721	1.15625	0.25467	0.0161018
orf19.2125		1218.56	1306.28	1289.5	645.506	1312.6	786.075	865.699	865.408	863.675	1603.88	1738.17	1442.28		1346.72	1345.3	1289.5	863.094	1312.6	1044.84	1005.82	865.408	986.685	1789.72	1866.45	1442.28		1327.17	1073.51	952.636	1699.49		1327.17	1174.12	1035.14	1733.46		orf19.2125	0.884677	0.126819	0.0422928	0.779962	0.00143606	0.0346174	1.30613	0.0476426	0.00277247
orf19.3615		918.562	922.277	855.498	455.506	814.598	523.075	1023.7	833.408	677.675	739.885	870.173	851.284		1015.17	949.828	855.498	609.049	814.598	695.263	1189.39	833.408	774.194	825.614	934.391	851.284		940.164	706.303	932.33	870.43		940.164	772.497	1013.08	887.829		orf19.3615	0.821662	0.0362996	0.0136124	1.07755	0.957357	0.15077	0.944334	0.286815	0.484647
orf19.409		4626.56	5002.28	4848.5	2209.51	3562.6	2291.07	1892.7	2221.41	2363.67	5449.88	5458.17	4714.28		5113.14	5151.71	4848.5	2954.29	3562.6	3045.26	2199.04	2221.41	2700.33	6081.35	5860.98	4714.28		5037.78	3187.38	2373.59	5552.21		5037.78	3486.1	2579.17	5663.19		orf19.409	0.691991	0.000950139	0.000618815	0.511965	0.000147731	0.155229	1.12414	0.301834	0.000776403
orf19.411		182.562	188.277	275.498	263.506	284.598	218.075	569.699	515.408	446.675	593.885	656.173	630.284		201.762	193.901	275.498	352.329	284.598	289.862	661.907	515.408	510.293	662.697	704.598	630.284		223.72	308.93	562.536	665.86		223.72	337.882	611.257	679.17		orf19.411	1.51029	0.0657576	0.0229225	2.73224	0.00378796	0.00070452	3.0358	0.000195702	0.00568795
orf19.4174		338.562	375.277	430.498	345.506	716.598	384.075	322.699	384.408	295.675	373.885	379.173	437.284		374.169	386.487	430.498	461.97	716.598	510.506	374.929	384.408	337.787	417.206	407.156	437.284		397.051	563.025	365.708	420.549		397.051	615.791	397.382	428.955		orf19.4174	1.55091	0.106368	0.036063	1.00083	0.231563	0.15077	1.08035	0.289357	0.154267
orf19.449		2756.56	3212.28	3838.5	1658.51	3931.6	2074.07	4036.7	3168.41	2848.67	3799.88	3676.17	3601.28		3046.47	3308.23	3838.5	2217.56	3931.6	2756.83	4690.05	3168.41	3254.4	4240.17	3947.47	3601.28		3397.73	2968.66	3704.29	3929.64		3397.73	3246.88	4025.11	4008.19		orf19.449	0.955602	0.484128	0.141572	1.18465	0.604285	0.0837682	1.17967	0.148075	0.322968
orf19.4706		640.562	751.277	743.498	194.506	440.598	275.075	622.699	639.408	358.675	587.885	681.173	629.284		707.93	773.719	743.498	260.071	440.598	365.625	723.485	639.408	409.76	656.002	731.443	629.284		741.716	355.431	590.884	672.243		741.716	388.742	642.06	685.681		orf19.4706	0.524112	0.00227109	0.0012491	0.865642	0.190009	0.0728214	0.924452	0.125966	0.134141
orf19.5517		258.562	291.277	162.498	36.5064	111.598	100.075	153.699	184.408	159.675	333.885	327.173	372.284		285.755	299.978	162.498	48.812	111.598	133.018	178.576	184.408	182.417	372.571	351.318	372.284		249.41	97.8093	181.8	365.391		249.41	106.976	197.546	372.695		orf19.5517	0.428915	0.0397126	0.0145613	0.792051	0.1966	0.0390025	1.49431	0.0586022	0.137223
orf19.5626		1490.56	1667.28	1204.5	2930.51	3858.6	2232.07	1685.7	2103.41	2167.67	1858.88	2029.17	1988.28		1647.32	1717.08	1204.5	3918.32	3858.6	2966.84	1958.53	2103.41	2476.41	2074.27	2178.92	1988.28		1522.97	3581.25	2179.45	2080.49		1522.97	3916.88	2368.21	2122.08		orf19.5626	2.57188	0.00405045	0.0020252	1.555	0.0420117	0.0237994	1.39339	0.0303503	0.0405542
orf19.5848		250.562	319.277	351.498	87.5064	310.598	179.075	162.699	147.408	99.6748	160.885	180.173	194.284		276.914	328.815	351.498	117.003	310.598	238.023	189.032	147.408	113.871	179.526	193.47	194.284		319.075	221.875	150.104	189.093		319.075	242.669	163.104	192.873		orf19.5848	0.760538	0.184147	0.0599688	0.511178	0.00549217	0.00551049	0.604476	0.0045225	0.00811811
orf19.6578		1834.56	2107.28	1850.5	156.506	375.598	202.075	1360.7	1634.41	1707.67	1099.88	1130.17	971.284		2027.5	2170.23	1850.5	209.262	375.598	268.595	1580.93	1634.41	1950.89	1227.33	1213.58	971.284		2016.08	284.485	1722.08	1137.4		2016.08	311.146	1871.23	1160.13		orf19.6578	0.154333	7.76903e-05	0.000134964	0.928153	0.117773	0.00385499	0.575441	0.00211682	0.0934104
orf19.6660		216.562	259.277	253.498	126.506	257.598	177.075	260.699	262.408	240.675	685.885	673.173	534.284		239.338	267.022	253.498	169.149	257.598	235.365	302.894	262.408	274.953	765.357	722.853	534.284		253.286	220.704	280.085	674.165		253.286	241.388	304.343	687.641		orf19.6660	0.953027	0.30534	0.0950586	1.20158	0.136019	0.00514134	2.71488	0.00415462	0.102122
orf19.670.2		35350.6	41057.3	43613.5	11508.5	28172.6	15493.1	58450.7	45010.4	43350.7	42534.9	40108.2	38302.3		39068.4	42283.8	43613.5	15387.8	28172.6	20593.2	67911.1	45010.4	49525	47463.3	43068.1	38302.3		41655.2	21384.5	54148.8	42944.6		41655.2	23388.7	58838.6	43803		orf19.670.2	0.561482	0.00682619	0.00307179	1.41252	0.154707	0.312492	1.05156	0.686535	0.114338
ARP3		821.562	873.277	1075.5	1078.51	1430.6	1024.07	865.699	1262.41	938.675	1129.88	1137.17	1355.28		907.966	899.364	1075.5	1442.05	1430.6	1361.18	1005.82	1262.41	1072.37	1260.8	1221.1	1355.28		960.942	1411.28	1113.53	1279.06		960.942	1543.54	1209.97	1304.63		ARP3	1.60628	0.00198455	0.00112911	1.25915	0.186801	0.0109991	1.35766	0.0103533	0.132867
CLN3		1113.56	1226.28	728.498	899.506	1135.6	1012.07	854.699	1167.41	902.675	1629.88	1838.17	2171.28		1230.68	1262.91	728.498	1202.71	1135.6	1345.23	993.035	1167.41	1031.24	1818.74	1973.83	2171.28		1074.03	1227.85	1063.89	1987.95		1074.03	1342.92	1156.04	2027.69		CLN3	1.25036	0.449565	0.133254	1.07636	0.958023	0.0109991	1.88793	0.0104158	0.484647
CMK2		886.562	995.277	1107.5	890.506	1536.6	1017.07	1006.7	1169.41	879.675	810.885	893.173	1176.28		979.802	1025.01	1107.5	1190.68	1536.6	1351.88	1169.64	1169.41	1004.96	904.841	959.088	1176.28		1037.44	1359.72	1114.67	1013.4		1037.44	1487.15	1211.21	1033.66		CMK2	1.43349	0.0391437	0.0144598	1.1675	0.309296	0.356044	0.996362	0.804696	0.189996
YRA1		1011.56	1129.28	990.498	1523.51	2411.6	1643.07	1557.7	1213.41	1031.67	1148.88	1226.17	1436.28		1117.95	1163.01	990.498	2037.05	2411.6	2183.95	1809.82	1213.41	1178.61	1282	1316.66	1436.28		1090.49	2210.87	1400.61	1344.98		1090.49	2418.07	1521.92	1371.87		YRA1	2.21742	0.00074648	0.000513219	1.39563	0.216023	0.0188919	1.25804	0.0217066	0.148086
orf19.3456		79.5622	134.277	98.4975	1	59.5982	48.0747	119.699	53.408	82.6748	134.885	163.173	188.284		87.9298	138.288	98.4975	1	59.5982	63.9002	139.073	53.408	94.4499	150.514	175.215	188.284		108.239	41.4995	95.6435	171.338		108.239	45.3888	103.927	174.763		orf19.3456	0.41934	0.0585226	0.0209918	0.960167	0.687484	0.0231479	1.61461	0.0289349	0.357341
Sum		724412	777376	800598	547462	732001	550714	634147	736786	644931	703406	730964	784908														Sum	800598	731996	736786	784908
NF		1.10517	1.02987	1	1.33708	1	1.32918	1.16185	1	1.14243	1.11587	1.0738	1														NF_WT	1	1.09372	1.08661	1.01999

## Sheet: In vivo_Ear
Probe Name		Counts after Background subtraction																Normalize count - WT						Normalize count - efg1			Normalize count - rob1			Normalize count - brg1				Avg_Individual replicates					Normalize to WT_Avg					Probe name	efg1ΔΔ/WT			rob1ΔΔ/WT
		WT_E1	WT_E2	WT_E3	WT_E4	WT_E5	WT_E6	efg1ΔΔ	efg1ΔΔ	efg1ΔΔ	rob1ΔΔ	rob1ΔΔ	rob1ΔΔ	brg1ΔΔ	brg1ΔΔ	brg1ΔΔ		WT_E1	WT_E2	WT_E3	WT_E4	WT_E5	WT_E6	efg1ΔΔ	efg1ΔΔ	efg1ΔΔ	rob1ΔΔ	rob1ΔΔ	rob1ΔΔ	brg1ΔΔ	brg1ΔΔ	brg1ΔΔ		Avg_WT	Avg_efg1ΔΔ	Avg_rob1ΔΔ	Avg_brg1ΔΔ		WT	efg1ΔΔ	rob1ΔΔ	brg1ΔΔ			FC	T-test	FDR	FC	T-test
ACE2		171.094	146.52	201.292	167.844	191.765	106.039	260.76	380.993	201.239	1297.89	1485.72	976.048	1482.1	1090.61	641.066		186.906	177.066	201.292	186.264	253.157	255.536	393.863	602.044	201.239	1702.01	1485.72	1359.62	1637.03	1361.26	641.066		210.037	399.049	1515.78	1213.12		210.037	1287.02	8098.11	2235.76		ACE2	6.12758	0.0471996	0.0423422	38.5557	2.78964e-07
ACS1		1412.09	2601.52	1574.29	2954.84	1594.76	1414.04	2307.76	1943.99	3780.24	857.893	1079.72	949.048	3213.1	2340.61	2954.07		1542.6	3143.87	1574.29	3279.13	2105.32	3407.61	3485.74	3071.89	3780.24	1125.01	1079.72	1322.01	3548.97	2921.47	2954.07		2508.8	3445.96	1175.58	3141.5		2508.8	11114	6280.57	5789.74		ACS1	4.42998	0.124088	0.0875249	2.50341	0.0377421
ACS2		723.094	1369.52	731.292	1497.84	612.765	280.039	466.76	428.993	592.239	143.893	215.719	127.048	558.1	463.609	646.066		789.921	1655.03	731.292	1662.23	808.937	674.85	705.014	677.893	592.239	188.696	215.719	176.976	616.44	578.662	646.066		1053.71	658.382	193.797	613.723		1053.71	2123.43	1035.37	1131.08		ACS2	2.01519	0.204148	0.131911	0.982591	0.0184688
ADH5		24870.1	12890.5	27998.3	14068.8	20733.8	14121	568.76	538.993	1088.24	1884.89	2366.72	1710.05	11407.1	13580.6	16255.1		27168.5	15577.9	27998.3	15612.8	27371.5	34029.5	859.079	851.715	1088.24	2471.78	2366.72	2382.07	12599.5	16950.9	16255.1		24626.4	933.011	2406.86	15268.5		24626.4	3009.16	12858.7	28139.6		ADH5	0.122192	0.00109077	0.00299267	0.52215	0.00157223
AHR1		2491.09	1344.52	2530.29	1423.84	2911.76	1402.04	97.7602	76.9927	167.239	193.893	265.719	198.048	407.1	365.609	266.066		2721.31	1624.82	2530.29	1580.1	3843.95	3378.7	147.661	121.664	167.239	254.264	265.719	275.877	449.656	456.341	266.066		2613.2	145.521	265.287	390.688		2613.2	469.338	1417.3	720.031		AHR1	0.179603	0.00271752	0.00542309	0.542364	0.00354338
ALS1		4263.09	2930.52	4923.29	3157.84	5836.76	3520.04	63.7602	74.9927	171.239	461.893	607.719	486.048	3574.1	2744.61	3283.07		4657.08	3541.46	4923.29	3504.4	7705.36	8482.75	96.3061	118.503	171.239	605.71	607.719	677.057	3947.71	3425.73	3283.07		5469.06	128.683	630.162	3552.17		5469.06	415.03	3366.66	6546.59		ALS1	0.0758869	0.00402831	0.0069685	0.615583	0.00665481
ALS2		42.094	46.5205	41.2919	62.8437	30.7649	4.03852	245.76	302.993	278.239	148.893	243.719	156.048	45.1004	46.6093	33.0657		45.9842	56.2188	41.2919	69.7406	40.6141	9.73221	371.206	478.788	278.239	195.253	243.719	217.372	49.8149	58.1762	33.0657		43.9303	376.078	218.781	47.0189		43.9303	1212.93	1168.85	86.6551		ALS2	27.6104	6.92979e-05	0.000426888	26.6068	8.02596e-06
ALS3		10774.1	10238.5	10950.3	11292.8	8766.76	3759.04	130.76	126.993	155.239	113.893	158.719	133.048	472.1	323.609	298.066		11769.8	12373	10950.3	12532.2	11573.4	9058.7	197.506	200.674	155.239	149.355	158.719	185.333	521.45	403.918	298.066		11376.2	184.473	164.469	407.811		11376.2	594.965	878.682	751.59		ALS3	0.0522989	1.58694e-06	2.9328e-05	0.0772384	1.56738e-06
ALS4		4614.09	648.52	4714.29	781.844	978.765	1001.04	281.76	325.993	429.239	1748.89	2215.72	1290.05	7278.1	10245.6	15020.1		5040.52	783.721	4714.29	867.648	1292.11	2412.35	425.582	515.133	429.239	2293.44	2215.72	1797.02	8038.9	12788.2	15020.1		2518.44	456.651	2102.06	11949.1		2518.44	1472.8	11230.3	22021.9		ALS4	0.584807	0.115452	0.0833418	4.45923	0.728399
ALS5		105.094	35.5205	114.292	21.8437	114.765	27.0385	38.7602	53.9927	52.239	32.8929	43.7191	41.0478	195.1	143.609	81.0657		114.807	42.9256	114.292	24.241	151.506	65.1587	58.545	85.3191	52.239	43.1346	43.7191	57.1789	215.495	179.248	81.0657		85.4883	65.3677	48.0109	158.603		85.4883	210.825	256.5	292.303		ALS5	2.46613	0.524573	0.276974	3.00041	0.243939
ALS6		1	1	1	1	1	1	1	1	1	1	1	1	1	1	1		1	1	1	1	1	1	1	1	1	1	1	1	1	1	1		1	1	1	1		1	3.22522	5.34253	1.84298		ALS6	3.22522	1	0.491489	5.34253	1
ALS7		758.094	512.52	810.292	548.844	1489.76	922.039	4248.76	4961.99	5383.24	226.893	356.719	270.048	628.1	568.609	393.066		828.155	619.368	810.292	609.077	1966.7	2221.97	6417.5	7840.93	5383.24	297.539	356.719	376.172	693.757	709.719	393.066		1175.93	6547.22	343.477	598.847		1175.93	21116.2	1835.04	1103.67		ALS7	17.9571	6.39376e-05	0.000426888	1.5605	0.0951326
ALS9		56.094	76.5205	82.2919	86.8437	52.7649	6.03852	58.7602	41.9927	134.239	23.8929	36.7191	21.0478	100.1	87.6093	107.066		61.2781	92.4731	82.2919	96.3745	69.6572	14.5519	88.7539	66.3567	134.239	31.3323	36.7191	29.3193	110.564	109.351	107.066		69.4378	96.4499	32.4569	108.994		69.4378	311.072	173.402	200.874		ALS9	4.47987	0.262922	0.150894	2.49723	0.0788411
AOX2		4342.09	2849.52	4840.29	3008.84	3898.76	1830.04	4004.76	3648.99	3748.24	1277.89	2094.72	1351.05	8232.1	6219.61	4855.07		4743.38	3443.57	4840.29	3339.05	5146.93	4410.11	6048.95	5766.13	3748.24	1675.78	2094.72	1881.99	9092.62	7763.11	4855.07		4320.56	5187.77	1884.16	7236.93		4320.56	16731.7	10066.2	13337.6		AOX2	3.87258	0.227595	0.139853	2.32984	0.00112504
ARG1		140.094	142.52	139.292	170.844	93.7649	31.0385	145.76	98.9927	436.239	104.893	126.719	121.048	128.1	131.609	157.066		153.041	172.232	139.292	189.593	123.783	74.798	220.162	156.428	436.239	137.553	126.719	168.618	141.491	164.27	157.066		142.123	270.943	144.297	154.276		142.123	873.851	770.908	284.328		ARG1	6.14854	0.0705916	0.0572163	5.42422	0.934464
ARG81		135.094	167.52	142.292	175.844	316.765	112.039	131.76	125.993	219.239	28.8929	40.7191	28.0478	109.1	78.6093	97.0657		147.579	202.444	142.292	195.142	418.175	269.996	199.016	199.093	219.239	37.8892	40.7191	39.0701	120.505	98.1175	97.0657		229.271	205.783	39.2261	105.229		229.271	663.694	209.567	193.936		ARG81	2.8948	0.715837	0.366146	0.914056	0.0179378
BCR1		778.094	557.52	929.292	566.844	1228.76	648.039	161.76	176.993	294.239	301.893	394.719	270.048	1062.1	1037.61	789.066		850.004	673.75	929.292	629.053	1622.15	1561.67	244.329	279.683	294.239	395.892	394.719	376.172	1173.12	1295.11	789.066		1044.32	272.751	388.928	1085.77		1044.32	879.68	2077.86	2001.05		BCR1	0.842348	0.021684	0.0250552	1.98968	0.0410214
BRG1		3437.09	1575.52	4080.29	1761.84	4078.76	2210.04	52.7602	39.9927	127.239	388.893	570.719	360.048	1	1	1		3754.74	1903.98	4080.29	1955.2	5384.55	5325.85	79.6912	63.1963	127.239	509.98	570.719	501.541	1	1	1		3734.1	90.0422	527.413	1		3734.1	290.406	2817.72	1.84298		BRG1	0.0777712	0.00550702	0.00829543	0.754591	0.0102811
CAP1		1603.09	1206.52	1642.29	1321.84	1829.76	928.039	597.76	520.993	780.239	360.893	609.719	376.048	1513.1	1174.61	1425.07		1751.25	1458.05	1642.29	1466.91	2415.55	2236.43	902.882	823.272	780.239	473.262	609.719	523.828	1671.27	1466.11	1425.07		1828.41	835.464	535.603	1520.81		1828.41	2694.55	2861.48	2802.84		CAP1	1.47371	0.00466347	0.00730352	1.565	0.00110858
CAT1		2842.09	1639.52	2983.29	1719.84	907.765	788.039	1670.76	1248.99	2933.24	472.893	586.719	586.048	1449.1	1365.61	1679.07		3104.75	1981.32	2983.29	1908.59	1198.38	1899.05	2523.58	1973.66	2933.24	620.135	586.719	816.355	1600.58	1704.51	1679.07		2179.23	2476.83	674.403	1661.38		2179.23	7988.31	3603.02	3061.91		CAT1	3.66565	0.54844	0.287931	1.65334	0.0109109
CDC10		337.094	691.52	382.292	773.844	224.765	99.0385	1	4.99268	23.239	5.89294	2.71909	1	1	1	1		368.247	835.685	382.292	858.77	296.722	238.668	1	7.88942	23.239	7.72779	2.71909	1	1	1	1		496.731	10.7095	3.81562	1		496.731	34.5404	20.3851	1.84298		CDC10	0.0695355	0.0216928	0.0250552	0.0410385	0.0204194
CDR1		1427.09	1467.52	1524.29	1710.84	1858.76	741.039	275.76	203.993	427.239	295.893	463.719	277.048	938.1	648.609	1099.07		1558.98	1773.46	1524.29	1898.6	2453.84	1785.79	416.52	322.349	427.239	388.023	463.719	385.923	1036.16	809.573	1099.07		1832.49	388.702	412.555	981.6		1832.49	1253.65	2204.09	1809.07		CDR1	0.684123	0.000187097	0.00078582	1.20278	0.000204509
CDR2		21.094	25.5205	15.2919	28.8437	1	1	1	1	1	1	1	1	1	1	1		23.0434	30.8408	15.2919	32.0092	1.32014	2.40985	1	1	1	1	1	1	1	1	1		17.4859	1	1	1		17.4859	3.22522	5.34253	1.84298		CDR2	0.184447	0.0806187	0.062598	0.305534	0.0806187
CHT2		111.094	1230.52	111.292	1301.84	118.765	92.0385	233.76	178.993	404.239	34.8929	57.7191	21.0478	28.1004	5.60928	219.066		121.361	1487.05	111.292	1444.72	156.787	221.799	353.081	282.844	404.239	45.7574	57.7191	29.3193	31.0378	7.00132	219.066		590.501	346.721	44.2652	85.7016		590.501	1118.25	236.488	157.947		CHT2	1.89373	0.567707	0.296362	0.400487	0.22044
CHT3		298.094	186.52	318.292	190.844	254.765	151.039	644.76	439.993	808.239	127.893	148.719	108.048	606.1	591.609	670.066		325.643	225.405	318.292	211.788	336.326	363.98	973.872	695.275	808.239	167.714	148.719	150.509	669.458	738.427	670.066		296.906	825.796	155.647	692.65		296.906	2663.37	831.551	1276.54		CHT3	8.97043	8.09641e-05	0.000440041	2.80072	0.00721094
CIT1		2130.09	2954.52	2228.29	3167.84	2202.76	1362.04	3048.76	2220.99	6444.24	718.893	910.719	1077.05	4102.1	2838.61	3766.07		2326.95	3570.46	2228.29	3515.5	2907.96	3282.3	4604.97	3509.61	6444.24	942.731	910.719	1500.31	4530.9	3543.06	3766.07		2971.91	4852.94	1117.92	3946.68		2971.91	15651.8	5972.52	7273.66		CIT1	5.26657	0.0248771	0.0280322	2.00966	0.00160703
CPH1		121.094	124.52	136.292	159.844	71.7649	15.0385	28.7602	21.9927	39.239	24.8929	9.71909	18.0478	25.1004	30.6093	52.0657		132.285	150.48	136.292	177.386	94.7399	36.2405	43.4406	34.7528	39.239	32.6437	9.71909	25.1403	27.7242	38.2055	52.0657		121.237	39.1441	22.501	39.3318		121.237	126.248	120.212	72.4879		CPH1	1.04133	0.0278034	0.030388	0.991547	0.0131762
CPH2		1306.09	1103.52	1407.29	1350.84	1844.76	872.039	842.76	1059.99	1715.24	561.893	684.719	463.048	1929.1	1724.61	1647.07		1426.8	1333.58	1407.29	1499.09	2435.35	2101.48	1272.94	1675	1715.24	736.846	684.719	645.018	2130.75	2152.6	1647.07		1700.6	1554.39	688.861	1976.81		1700.6	5013.25	3680.26	3643.22		CPH2	2.94793	0.626603	0.32527	2.1641	0.00755408
CRH11		609.094	1114.52	634.292	1133.84	888.765	409.039	172.76	152.993	389.239	39.8929	43.7191	19.0478	228.1	174.609	381.066		665.385	1346.87	634.292	1258.28	1173.3	985.72	260.944	241.759	389.239	52.3142	43.7191	26.5333	251.944	217.941	381.066		1010.64	297.314	40.8555	283.651		1010.64	958.902	218.272	522.764		CRH11	0.948807	0.00611581	0.00869385	0.215974	0.0010818
CSA1		2691.09	19588.5	2922.29	21704.8	3442.76	1865.04	1077.76	1274.99	2371.24	423.893	408.719	131.048	6587.1	4489.61	7939.07		2939.8	23672.2	2922.29	24086.9	4544.94	4494.45	1627.89	2014.74	2371.24	555.878	408.719	182.547	7275.67	5603.78	7939.07		10443.4	2004.62	382.382	6939.5		10443.4	6465.35	2042.88	12789.4		CSA1	0.619083	0.218069	0.137015	0.195614	0.150645
CSH1		1409.09	4572.52	1657.29	4830.84	903.765	500.039	363.76	445.993	1158.24	328.893	371.719	228.048	771.1	620.609	1653.07		1539.32	5525.78	1657.29	5361.01	1193.1	1205.02	549.438	704.757	1158.24	431.298	371.719	317.667	851.706	774.624	1653.07		2746.92	804.145	373.561	1093.13		2746.92	2593.54	1995.76	2014.62		CSH1	0.944164	0.166729	0.113277	0.726546	0.100187
DAK2		341.094	267.52	388.292	294.844	151.765	93.0385	154.76	143.993	344.239	84.8929	80.7191	75.0478	346.1	336.609	594.066		372.617	323.292	388.292	327.202	200.351	224.208	233.756	227.537	344.239	111.326	80.7191	104.54	382.279	420.145	594.066		305.994	268.511	98.8617	465.496		305.994	866.006	528.171	857.903		DAK2	2.83014	0.497517	0.267271	1.72609	0.00297018
DDR48		7073.09	23028.5	7396.29	24984.8	6700.76	4604.04	71.7602	82.9927	435.239	1164.89	1513.72	777.048	3002.1	2012.61	9306.07		7726.77	27829.4	7396.29	27726.8	8845.97	11095	108.39	131.145	435.239	1527.6	1513.72	1082.41	3315.92	2512.07	9306.07		15103.4	224.924	1374.58	5044.69		15103.4	725.431	7343.72	9297.28		DDR48	0.048031	0.0401684	0.0379327	0.48623	0.0534348
DFG5		269.094	632.52	279.292	644.844	275.765	94.0385	125.76	132.993	177.239	29.8929	42.7191	22.0478	177.1	172.609	370.066		293.963	764.385	279.292	715.613	364.049	226.618	189.953	210.155	177.239	39.2005	42.7191	30.7122	195.613	215.445	370.066		440.653	192.449	37.544	260.375		440.653	620.69	200.58	479.867		DFG5	1.40857	0.122789	0.0872748	0.455187	0.0246227
ECE1		179799	114509	193992	122733	151346	73162	2.76023	9.99268	19.239	37.8929	46.7191	46.0478	1728.1	1119.61	929.066		196416	138381	193992	136202	199798	176309	4.16916	15.7904	19.239	49.6914	46.7191	64.1438	1908.74	1397.46	929.066		173516	13.0662	53.5181	1411.76		173516	42.1413	285.922	2601.84		ECE1	0.000242867	2.23203e-05	0.000229152	0.00164781	2.23546e-05
ECM331		1322.09	1807.52	1346.29	1962.84	1303.76	819.039	52.7602	45.9927	172.239	47.8929	69.7191	40.0478	228.1	139.609	464.066		1444.28	2184.34	1346.29	2178.26	1721.16	1973.76	79.6912	72.6775	172.239	62.8051	69.7191	55.7859	251.944	174.256	464.066		1808.01	108.203	62.77	296.755		1808.01	348.977	335.351	546.915		ECM331	0.193017	0.000107365	0.000506352	0.18548	8.81347e-05
EFG1		664.094	1408.52	718.292	1477.84	1156.76	438.039	1	1	1	321.893	440.719	268.048	669.1	598.609	909.066		725.468	1702.16	718.292	1640.03	1527.1	1055.61	1	1	1	422.119	440.719	373.386	739.043	747.164	909.066		1228.11	1	412.075	798.424		1228.11	3.22522	2201.52	1471.48		EFG1	0.00262617	0.00269131	0.00542309	1.79261	0.0196436
ELF1		125.094	103.52	156.292	124.844	112.765	36.0385	66.7602	46.9927	269.239	34.8929	23.7191	20.0478	132.1	128.609	188.066		136.655	125.102	156.292	138.545	148.866	86.8473	100.837	74.2577	269.239	45.7574	23.7191	27.9263	145.909	160.526	188.066		132.051	148.111	32.4676	164.834		132.051	477.692	173.459	303.786		ELF1	3.61747	0.717235	0.366146	1.31357	0.000338222
ENA2		1303.09	1418.52	1430.29	1582.84	1605.76	982.039	483.76	423.993	753.239	378.893	398.719	331.048	815.1	1173.61	1677.07		1423.52	1714.25	1430.29	1756.55	2119.84	2366.56	730.691	669.992	753.239	496.867	398.719	461.144	900.305	1464.86	1677.07		1801.84	717.974	452.243	1347.41		1801.84	2315.62	2416.12	2483.26		ENA2	1.28515	0.00197247	0.00455647	1.34092	0.000559701
ENA21		2159.09	3905.52	2424.29	4270.84	2266.76	1050.04	487.76	434.993	1142.24	554.893	649.719	424.048	2288.1	1696.61	4587.07		2358.63	4719.72	2424.29	4739.55	2992.45	2530.43	736.733	687.374	1142.24	727.667	649.719	590.692	2527.28	2117.65	4587.07		3294.18	855.449	656.026	3077.33		3294.18	2759.01	3504.84	5671.48		ENA21	0.83754	0.00916038	0.0120917	1.06395	0.00597041
FAV2		166.094	116.52	170.292	93.8437	125.765	26.0385	16.7602	25.9927	151.239	31.8929	28.7191	21.0478	4.10041	3.60928	35.0657		181.444	140.812	170.292	104.143	166.028	62.7488	25.3153	41.0736	151.239	41.8233	28.7191	29.3193	4.52904	4.50498	35.0657		137.578	72.5426	33.2872	14.6999		137.578	233.966	177.838	27.0917		FAV2	1.70061	0.12855	0.089985	1.29263	0.00686686
FBP1		1521.09	1090.52	1716.29	1217.84	924.765	399.039	905.76	776.993	1381.24	312.893	490.719	356.048	1304.1	1088.61	1118.07		1661.67	1317.87	1716.29	1351.5	1220.82	961.621	1368.1	1227.8	1381.24	410.317	490.719	495.969	1440.42	1358.77	1118.07		1371.63	1325.71	465.668	1305.75		1371.63	4275.71	2487.85	2406.48		FBP1	3.11725	0.796568	0.400015	1.81379	0.00106584
FDH1		1346.09	2555.52	1463.29	2957.84	1938.76	1222.04	5102.76	4462.99	10599.2	743.893	1013.72	711.048	3414.1	2447.61	3996.07		1470.5	3088.28	1463.29	3282.45	2559.45	2944.92	7707.42	7052.41	10599.2	975.515	1013.72	990.478	3770.99	3055.02	3996.07		2468.15	8453.02	993.237	3607.36		2468.15	27262.8	5306.4	6648.31		FDH1	11.0459	0.00022322	0.00085932	2.14995	0.0187693
FGR15		62.094	55.5205	50.2919	56.8437	47.7649	1	38.7602	16.9927	88.239	19.8929	16.7191	13.0478	44.1004	24.6093	34.0657		67.8326	67.0951	50.2919	63.0821	63.0565	2.40985	58.545	26.8518	88.239	26.0869	16.7191	18.1754	48.7103	30.7165	34.0657		52.2947	57.8786	20.3271	37.8308		52.2947	186.671	108.598	69.7217		FGR15	3.5696	0.777704	0.392677	2.07666	0.0735814
FKH2		133.094	63.5205	115.292	92.8437	53.7649	24.0385	29.7602	24.9927	44.239	17.8929	19.7191	20.0478	80.1004	49.6093	26.0657		145.394	76.7629	115.292	103.033	70.9773	57.9291	44.9511	39.4934	44.239	23.4642	19.7191	27.9263	88.4735	61.9207	26.0657		94.8981	42.8945	23.7032	58.82		94.8981	138.344	126.635	108.404		FKH2	1.45782	0.0320742	0.0331612	1.33443	0.00820402
FRP1		1156.09	4330.52	1321.29	4775.84	3064.76	1018.04	1074.76	1137.99	1816.24	373.893	438.719	208.048	3481.1	2445.61	3229.07		1262.94	5233.33	1321.29	5299.97	4045.93	2453.32	1623.36	1798.25	1816.24	490.31	438.719	289.807	3844.99	3052.53	3229.07		3269.46	1745.95	406.279	3375.53		3269.46	5631.07	2170.56	6221.05		FRP1	1.72232	0.210403	0.135009	0.663888	0.0358768
FRP2		493.094	2073.52	501.292	2195.84	504.765	275.039	271.76	265.993	433.239	89.8929	99.7191	71.0478	487.1	289.609	1068.07		538.665	2505.8	501.292	2436.83	666.362	662.8	410.478	420.321	433.239	117.882	99.7191	98.9684	538.018	361.481	1068.07		1218.62	421.346	105.523	655.855		1218.62	1358.93	563.761	1208.73		FRP2	1.11514	0.212602	0.135479	0.462621	0.0970969
FRP3		1190.09	1491.52	1242.29	1489.84	1033.76	866.039	3182.76	2219.99	5421.24	605.893	854.719	875.048	2268.1	2113.61	1901.07		1300.08	1802.47	1242.29	1653.35	1364.72	2087.02	4807.37	3508.03	5421.24	794.546	854.719	1218.93	2505.19	2638.14	1901.07		1574.99	4578.88	956.064	2348.13		1574.99	14767.9	5107.8	4327.57		FRP3	9.37651	0.000182555	0.00078582	3.24308	0.024364
FTR1		5565.09	9311.52	6044.29	10192.8	8183.76	3451.04	3542.76	4130.99	7758.24	974.893	1257.72	633.048	9046.1	6253.61	8579.07		6079.41	11252.7	6044.29	11311.5	10803.7	8316.47	5351.13	6527.79	7758.24	1278.44	1257.72	881.825	9991.71	7805.55	8579.07		8968.02	6545.72	1139.33	8792.11		8968.02	21111.4	6086.89	16203.7		FTR1	2.35407	0.165633	0.113277	0.678733	0.00122676
GAL1		7377.09	3094.52	7823.29	3351.84	6504.76	3427.04	1045.76	1107.99	1832.24	925.893	1260.72	1006.05	4379.1	3665.61	3776.07		8058.87	3739.65	7823.29	3719.69	8587.22	8258.63	1579.56	1750.85	1832.24	1214.18	1260.72	1401.41	4836.86	4575.29	3776.07		6697.89	1720.88	1292.1	4396.07		6697.89	5550.22	6903.1	8101.89		GAL1	0.828652	0.00875547	0.0117248	1.03064	0.00582546
GAL4		758.094	744.52	821.292	850.844	616.765	438.039	242.76	208.993	359.239	163.893	226.719	156.048	587.1	465.609	911.066		828.155	899.734	821.292	944.22	814.218	1055.61	366.675	330.25	359.239	214.923	226.719	217.372	648.472	581.158	911.066		893.871	352.055	219.671	713.565		893.871	1135.45	1173.6	1315.09		GAL4	1.27027	2.96701e-05	0.000274151	1.31294	6.62469e-06
GAP2		327.094	1032.52	398.292	1134.84	542.765	528.039	1203.76	890.993	1387.24	381.893	454.719	308.048	1705.1	1516.61	1471.07		357.323	1247.78	398.292	1259.39	716.527	1272.49	1818.21	1407.94	1387.24	500.801	454.719	429.106	1883.34	1892.98	1471.07		875.3	1537.8	461.542	1749.13		875.3	4959.73	2465.8	3223.62		GAP2	5.66633	0.0487595	0.0433209	2.81709	0.159543
GCA2		1561.09	385.52	1629.29	395.844	417.765	326.039	238.76	208.993	420.239	334.893	401.719	386.048	564.1	542.609	841.066		1705.37	465.892	1629.29	439.286	551.509	785.702	360.633	330.25	420.239	439.167	401.719	537.758	623.067	677.267	841.066		929.508	370.374	459.548	713.8		929.508	1194.54	2455.15	1315.52		GCA2	1.28513	0.154146	0.106292	2.64134	0.221906
GCN4		2526.09	2770.52	2607.29	2791.84	2439.76	1283.04	1650.76	1051.99	2026.24	570.893	862.719	732.048	3837.1	2634.61	3569.07		2759.55	3348.11	2607.29	3098.24	3220.84	3091.92	2493.38	1662.36	2026.24	748.649	862.719	1019.73	4238.2	3288.43	3569.07		3020.99	2060.66	877.033	3698.57		3020.99	6646.07	4685.57	6816.4		GCN4	2.19996	0.00421864	0.00708725	1.55101	5.78518e-06
GIS2		748.094	361.52	825.292	384.844	539.765	273.039	743.76	597.993	1389.24	235.893	300.719	293.048	1135.1	1005.61	932.066		817.231	436.888	825.292	427.079	712.567	657.981	1123.41	944.947	1389.24	309.342	300.719	408.211	1253.76	1255.17	932.066		646.173	1152.53	339.424	1147		646.173	3717.16	1813.38	2113.9		GIS2	5.75258	0.00733508	0.0101159	2.80634	0.0255146
GNP1		12312.1	6378.52	14128.3	6951.84	9610.76	5358.04	2671.76	2340.99	3433.24	1300.89	1666.72	1217.05	6483.1	6539.61	5933.07		13449.9	7708.28	14128.3	7714.78	12687.6	12912	4035.54	3699.23	3433.24	1705.94	1666.72	1695.33	7160.8	8162.52	5933.07		11433.5	3722.67	1689.33	7085.46		11433.5	12006.4	9025.3	13058.4		GNP1	1.05011	0.00315284	0.00606643	0.789374	0.000839041
GPD2		399.094	176.52	467.292	177.844	499.765	246.039	53.7602	43.9927	277.239	20.8929	21.7191	27.0478	220.1	190.609	210.066		435.977	213.321	467.292	197.361	659.761	592.915	81.2017	69.5171	277.239	27.3983	21.7191	37.6772	243.108	237.912	210.066		427.771	142.653	28.9315	230.362		427.771	460.086	154.567	424.554		GPD2	1.07554	0.0523559	0.0460732	0.361332	0.0100101
HAC1		605.094	740.52	593.292	826.844	645.765	237.039	340.76	337.993	654.239	113.893	129.719	113.048	322.1	278.609	574.066		661.015	894.901	593.292	917.586	852.502	571.226	514.698	534.095	654.239	149.355	129.719	157.474	355.77	347.751	574.066		748.42	567.678	145.516	425.862		748.42	1830.88	777.423	784.858		HAC1	2.44633	0.108722	0.0806258	1.03875	0.00036886
HAP2		184.094	324.52	189.292	393.844	468.765	171.039	93.7602	96.9927	193.239	56.8929	67.7191	37.0478	445.1	318.609	547.066		201.108	392.175	189.292	437.066	618.837	412.176	141.619	153.268	193.239	74.6074	67.7191	51.607	491.628	397.678	547.066		375.109	162.709	64.6445	478.79		375.109	524.771	345.365	882.403		HAP2	1.39898	0.0642727	0.0549889	0.920706	0.0146136
HAP3		29.094	56.5205	26.2919	66.8437	41.7649	8.03852	18.7602	41.9927	62.239	13.8929	19.7191	11.0478	88.1004	43.6093	117.066		31.7828	68.3036	26.2919	74.1796	55.1356	19.3716	28.3362	66.3567	62.239	18.2187	19.7191	15.3894	97.3098	54.4317	117.066		45.8442	52.3107	17.7757	89.6024		45.8442	168.713	94.9674	165.136		HAP3	3.68015	0.69661	0.359591	2.07153	0.0822609
HAP43		229.094	357.52	307.292	379.844	501.765	228.039	395.76	378.993	709.239	118.893	161.719	103.048	556.1	377.609	661.066		250.266	432.055	307.292	421.53	662.401	549.538	597.772	598.883	709.239	155.912	161.719	143.544	614.231	471.319	661.066		437.18	635.298	153.725	582.205		437.18	2048.98	821.28	1073		HAP43	4.6868	0.072974	0.0581276	1.87858	0.0168581
HEM1		161.094	115.52	159.292	152.844	187.765	45.0385	172.76	122.993	311.239	37.8929	40.7191	22.0478	212.1	176.609	206.066		175.982	139.604	159.292	169.618	247.877	108.536	260.944	194.353	311.239	49.6914	40.7191	30.7122	234.272	220.438	206.066		166.818	255.512	40.3743	220.258		166.818	824.082	215.701	405.933		HEM1	4.94001	0.0414632	0.0379327	1.29303	0.00278689
HGT7		10475.1	3268.52	10598.3	3506.84	8920.76	4072.04	2976.76	3078.99	4349.24	2358.89	4271.72	3317.05	17942.1	14299.6	12642.1		11443.2	3949.93	10598.3	3891.71	11776.7	9812.98	4496.22	4865.42	4349.24	3093.37	4271.72	4620.59	19817.6	17848.3	12642.1		8578.79	4570.29	3995.23	16769.3		8578.79	14740.2	21344.6	30905.6		HGT7	1.71821	0.110817	0.0806258	2.48807	0.0773304
HOG1		211.094	396.52	234.292	434.844	172.765	74.0385	96.7602	84.9927	183.239	40.8929	31.7191	27.0478	108.1	79.6093	165.066		230.603	479.185	234.292	482.566	228.074	178.421	146.151	134.305	183.239	53.6255	31.7191	37.6772	119.4	99.3657	165.066		305.524	154.565	41.0073	127.944		305.524	498.506	219.083	235.799		HOG1	1.63164	0.110532	0.0806258	0.717072	0.0146962
HSP104		8048.09	2518.52	9155.29	2670.84	4472.76	3800.04	9047.76	11256	13406.2	13067.9	13574.7	7937.05	25920.1	27036.6	22143.1		8791.88	3043.57	9155.29	2963.96	5904.69	9157.51	13666.1	17786.7	13406.2	17136.8	13574.7	11056.2	28629.6	33746.2	22143.1		6502.82	14953	13922.6	28173		6502.82	48226.7	74381.7	51922.3		HSP104	7.41628	0.00395745	0.0069685	11.4384	0.00996369
HSP70		10830.1	6390.52	12551.3	7130.84	4478.76	3663.04	5946.76	6694.99	8757.24	13092.9	14923.7	10452	19203.1	22286.6	18086.1		11831	7722.78	12551.3	7913.42	5912.61	8827.36	8982.23	10579.4	8757.24	17169.6	14923.7	14559.5	21210.5	27817.4	18086.1		9126.41	9439.63	15550.9	22371.3		9126.41	30444.9	83081.3	41230		HSP70	3.33591	0.848339	0.423711	9.1034	0.00548109
HTA1		4114.09	4302.52	4320.29	4824.84	4038.76	2070.04	1145.76	981.993	2702.24	549.893	702.719	434.048	1411.1	1217.61	3141.07		4494.31	5199.49	4320.29	5354.35	5331.75	4988.47	1730.6	1551.74	2702.24	721.11	702.719	604.622	1558.61	1519.78	3141.07		4948.11	1994.86	676.15	2073.15		4948.11	6433.86	3612.35	3820.78		HTA1	1.30027	6.83146e-05	0.000426888	0.730047	8.64811e-07
HTA2		1216.09	1544.52	1394.29	1625.84	1288.76	715.039	494.76	428.993	1215.24	356.893	360.719	324.048	481.1	394.609	1176.07		1328.48	1866.51	1394.29	1804.27	1701.35	1723.13	747.306	677.893	1215.24	468.017	360.719	451.393	531.391	492.538	1176.07		1636.34	880.146	426.71	733.332		1636.34	2838.66	2279.71	1351.52		HTA2	1.73476	0.00323128	0.00606643	1.39317	4.26983e-05
HWP1		39715.1	43402.5	42031.3	48826.8	25640.8	14473	5.76023	1	1.23903	50.8929	40.7191	21.0478	398.1	222.609	401.066		43385.5	52450.9	42031.3	54185.4	33849.5	34877.8	8.70049	1	1.23903	66.7392	40.7191	29.3193	439.715	277.853	401.066		43463.4	3.64651	45.5925	372.878		43463.4	11.7608	243.579	687.208		HWP1	0.00027059	6.06595e-05	0.000426888	0.00560424	6.1039e-05
HYR1		6385.09	18549.5	7065.29	20574.8	3514.76	1656.04	6.76023	5.99268	35.239	20.8929	12.7191	12.0478	79.1004	49.6093	140.066		6975.19	22416.6	7065.29	22832.8	4639.99	3990.8	10.2109	9.46962	35.239	27.3983	12.7191	16.7824	87.369	61.9207	140.066		11320.1	18.3065	18.9666	96.4518		11320.1	59.0425	101.33	177.759		HYR1	0.00521571	0.0697815	0.0572163	0.00895127	0.0697943
IFD6		512.094	605.52	538.292	666.844	140.765	100.039	202.76	193.993	356.239	205.893	216.719	162.048	244.1	411.609	970.066		559.42	731.756	538.292	740.027	185.83	241.077	306.257	306.547	356.239	270.001	216.719	225.73	269.617	513.757	970.066		499.401	323.014	237.483	584.48		499.401	1041.79	1268.76	1077.19		IFD6	2.08608	0.255262	0.148677	2.54057	0.108353
IHD1		4548.09	8534.52	5150.29	9013.84	5327.76	1973.04	1.76023	1	5.23903	441.893	472.719	367.048	288.1	247.609	178.066		4968.42	10313.8	5150.29	10003.1	7033.41	4754.72	2.65872	1	5.23903	579.483	472.719	511.292	318.216	309.058	178.066		7037.28	2.96592	521.164	268.447		7037.28	9.56573	2784.34	494.743		IHD1	0.00135929	0.00245208	0.00539462	0.395655	0.00369641
INO4		95.094	168.52	82.2919	192.844	112.765	40.0385	130.76	97.9927	175.239	42.8929	31.7191	33.0478	68.1004	70.6093	61.0657		103.882	203.653	82.2919	214.008	148.866	96.4866	197.506	154.848	175.239	56.2483	31.7191	46.0351	75.2191	88.1322	61.0657		141.531	175.864	44.6675	74.8057		141.531	567.2	238.637	137.866		INO4	4.0076	0.357741	0.199128	1.68611	0.0254811
IRE1		211.094	318.52	214.292	347.844	340.765	184.039	81.7602	81.9927	240.239	30.8929	68.7191	33.0478	168.1	87.6093	207.066		230.603	384.924	214.292	386.018	449.858	443.504	123.494	129.565	240.239	40.5119	68.7191	46.0351	185.672	109.351	207.066		351.533	164.433	51.7553	167.363		351.533	530.331	276.504	308.447		IRE1	1.50862	0.0265383	0.0295438	0.786567	0.00193949
IRO1		431.094	610.52	545.292	673.844	578.765	274.039	53.7602	42.9927	77.239	52.8929	54.7191	62.0478	99.1004	80.6093	100.066		470.935	737.799	545.292	747.795	764.052	660.391	81.2017	67.9369	77.239	69.3619	54.7191	86.4316	109.46	100.614	100.066		654.377	75.4592	70.1709	103.38		654.377	243.372	374.89	190.527		IRO1	0.371915	9.14719e-05	0.000469546	0.572896	8.78634e-05
KIP4		996.094	1533.52	1092.29	1671.84	812.765	456.039	85.7602	81.9927	148.239	44.8929	63.7191	62.0478	263.1	181.609	148.066		1088.15	1853.22	1092.29	1855.32	1072.97	1098.98	129.536	129.565	148.239	58.871	63.7191	86.4316	290.603	226.679	148.066		1343.49	135.78	69.6739	221.782		1343.49	437.92	372.235	408.742		KIP4	0.325957	0.00139052	0.00347249	0.277066	0.00102531
KRE1		449.094	550.52	460.292	640.844	750.765	350.039	98.7602	90.9927	138.239	89.8929	132.719	85.0478	238.1	156.609	199.066		490.598	665.29	460.292	711.174	991.117	843.539	149.172	143.786	138.239	117.882	132.719	118.47	262.99	195.474	199.066		693.668	143.732	123.024	219.177		693.668	463.568	657.259	403.939		KRE1	0.668285	0.00275248	0.00542309	0.947512	0.00225327
MAC1		87.094	194.52	85.2919	224.844	72.7649	23.0385	54.7602	27.9927	90.239	11.8929	11.7191	5.04781	25.1004	22.6093	50.0657		95.143	235.073	85.2919	249.519	96.0601	55.5193	82.7121	44.234	90.239	15.596	11.7191	7.03152	27.7242	28.2202	50.0657		136.101	72.395	11.4489	35.3367		136.101	233.49	61.1659	65.125		MAC1	1.71556	0.250693	0.147541	0.449415	0.0415234
MAE1		751.094	1056.52	893.292	1219.84	526.765	285.039	255.76	217.993	421.239	160.893	191.719	164.048	753.1	624.609	701.066		820.508	1276.78	893.292	1353.72	695.405	686.899	386.311	344.472	421.239	210.989	191.719	228.516	831.824	779.617	701.066		954.433	384.007	210.408	770.835		954.433	1238.51	1124.11	1420.64		MAE1	1.29764	0.0137186	0.0171297	1.17778	0.00368462
MBF1		1739.09	1864.52	2072.29	2030.84	1920.76	1033.04	934.76	824.993	1288.24	470.893	650.719	525.048	2055.1	1682.61	2050.07		1899.82	2253.23	2072.29	2253.72	2535.68	2489.46	1411.9	1303.65	1288.24	617.512	650.719	731.383	2269.93	2100.18	2050.07		2250.7	1334.6	666.538	2140.06		2250.7	4304.37	3561	3944.09		MBF1	1.91246	0.000430516	0.00137166	1.58217	1.2688e-05
MDM34		10184.1	6119.52	10903.3	6895.84	10397.8	5753.04	3958.76	4381.99	5245.24	2082.89	2880.72	1977.05	6666.1	5525.61	5320.07		11125.3	7395.29	10903.3	7652.63	13726.5	13863.9	5979.47	6924.42	5245.24	2731.43	2880.72	2754	7362.93	6896.88	5320.07		10777.8	6049.71	2788.72	6526.62		10777.8	19511.6	14898.8	12028.5		MDM34	1.81035	0.0279543	0.030388	1.38236	0.00207958
MET28		612.094	560.52	627.292	608.844	513.765	205.039	361.76	229.993	552.239	233.893	325.719	239.048	822.1	702.609	1048.07		668.662	677.375	627.292	675.662	678.243	494.111	546.417	363.434	552.239	306.719	325.719	332.99	908.037	876.974	1048.07		636.891	487.363	321.809	944.359		636.891	1571.85	1719.28	1740.44		MET28	2.46801	0.0399644	0.0379327	2.69948	0.000175331
NDT80		604.094	555.52	717.292	583.844	841.765	278.039	431.76	394.993	701.239	174.893	196.719	140.048	757.1	599.609	553.066		659.923	671.333	717.292	647.918	1111.25	670.03	652.148	624.167	701.239	229.348	196.719	195.084	836.242	748.412	553.066		746.291	659.185	207.051	712.573		746.291	2126.01	1106.17	1313.26		NDT80	2.84877	0.449577	0.242929	1.48223	0.00157932
NPR1		163.094	138.52	187.292	141.844	215.765	88.0385	48.7602	40.9927	77.239	17.8929	30.7191	19.0478	160.1	138.609	140.066		178.167	167.399	187.292	157.411	284.841	212.159	73.6495	64.7765	77.239	23.4642	30.7191	26.5333	176.836	173.007	140.066		197.878	71.8883	26.9055	163.303		197.878	231.856	143.743	300.965		NPR1	1.17171	0.00275846	0.00542309	0.726425	0.000472778
NRG1		1078.09	441.52	1194.29	482.844	2343.76	956.039	164.76	118.993	417.239	467.893	645.719	410.048	2946.1	2889.61	3053.07		1177.73	533.566	1194.29	535.834	3094.1	2303.91	248.861	188.032	417.239	613.578	645.719	571.19	3254.06	3606.71	3053.07		1473.24	284.711	610.162	3304.61		1473.24	918.254	3259.81	6090.35		NRG1	0.623289	0.0939828	0.0717687	2.21268	0.201442
PCK1		18953.1	11821.5	20346.3	12848.8	14040.8	6109.04	2482.76	2117.99	5597.24	829.893	1055.72	795.048	6013.1	4908.61	5346.07		20704.7	14286	20346.3	14259	18535.8	14721.8	3750.06	3346.85	5597.24	1088.29	1055.72	1107.49	6641.67	6126.76	5346.07		17142.3	4231.38	1083.83	6038.16		17142.3	13647.1	5790.41	11128.2		PCK1	0.79611	0.000247661	0.000915499	0.337786	5.14845e-05
PES1		1.09399	1	4.29192	7.84374	3.76489	1	5.76023	1.99268	17.239	1	8.71909	1.04781	1	1	1		1.19509	1.20848	4.29192	8.70456	4.9702	2.40985	8.70049	3.14883	17.239	1	8.71909	1.45958	1	1	1		3.79668	9.69611	3.72622	1		3.79668	31.2721	19.9075	1.84298		PES1	8.23669	0.106246	0.0798141	5.24338	0.977107
PFK2		2216.09	1424.52	2526.29	1551.84	3072.76	1403.04	313.76	344.993	450.239	518.893	717.719	458.048	2151.1	2034.61	1683.07		2420.9	1721.5	2526.29	1722.15	4056.49	3381.11	473.916	545.157	450.239	680.458	717.719	638.053	2375.96	2539.53	1683.07		2638.07	489.771	678.743	2199.52		2638.07	1579.62	3626.21	4053.68		PFK2	0.598777	0.00610824	0.00869385	1.37457	0.00955946
PGA13		1301.09	5552.52	1436.29	5929.84	1844.76	1050.04	13.7602	41.9927	263.239	92.8929	93.7191	35.0478	412.1	230.609	686.066		1421.34	6710.08	1436.29	6580.62	2435.35	2530.43	20.784	66.3567	263.239	121.816	93.7191	48.821	455.178	287.839	686.066		3519.02	116.793	88.1189	476.361		3519.02	376.684	470.778	877.926		PGA13	0.107042	0.0545214	0.0475262	0.133781	0.052892
PGA17		4.09399	46.5205	18.2919	60.8437	90.7649	33.0385	349.76	287.993	504.239	16.8929	11.7191	7.04781	119.1	50.6093	51.0657		4.47234	56.2188	18.2919	67.5211	119.823	79.6177	528.292	455.085	504.239	22.1528	11.7191	9.81748	131.55	63.1688	51.0657		57.6574	495.872	14.5631	81.9283		57.6574	1599.3	77.8039	150.993		PGA17	27.7379	1.27367e-06	2.9328e-05	1.34942	0.131397
PGA25		8.09399	32.5205	9.29192	39.8437	67.7649	38.0385	345.76	273.993	478.239	16.8929	9.71909	6.04781	70.1004	21.6093	4.06572		8.84201	39.3002	9.29192	44.2164	89.4594	91.667	522.25	432.963	478.239	22.1528	9.71909	8.4245	77.4282	26.972	4.06572		47.1295	477.817	13.4321	36.1553		47.1295	1541.07	71.7615	66.6337		PGA25	32.6985	1.09558e-06	2.9328e-05	1.52265	0.171688
PGA34		795.094	786.52	847.292	863.844	1013.76	458.039	801.76	645.993	1403.24	41.8929	49.7191	35.0478	268.1	186.609	181.066		868.575	950.49	847.292	958.647	1338.31	1103.8	1211.01	1020.8	1403.24	54.9369	49.7191	48.821	296.126	232.919	181.066		1011.19	1211.68	51.159	236.704		1011.19	3907.94	273.319	436.241		PGA34	3.86471	0.171377	0.114263	0.270295	5.19334e-05
PGA37		86.094	160.52	112.292	178.844	149.765	34.0385	15.7602	12.9927	23.239	22.8929	25.7191	5.04781	24.1004	48.6093	45.0657		94.0506	193.985	112.292	198.471	197.711	82.0276	23.8049	20.531	23.239	30.021	25.7191	7.03152	26.6197	60.6725	45.0657		146.423	22.525	20.9239	44.1193		146.423	72.648	111.786	81.3112		PGA37	0.496152	0.00761227	0.0103438	0.763449	0.00748014
PGA48		5280.09	2991.52	5297.29	3195.84	4568.76	3080.04	785.76	858.993	984.239	218.893	404.719	273.048	1847.1	1375.61	1217.07		5768.07	3615.18	5297.29	3546.57	6031.42	7422.42	1186.84	1357.38	984.239	287.048	404.719	380.351	2040.18	1716.99	1217.07		5280.16	1176.15	357.373	1658.08		5280.16	3793.35	1909.28	3055.81		PGA48	0.718416	0.00254257	0.00542309	0.361594	0.000897513
PGA53		200.094	373.52	241.292	479.844	90.7649	56.0385	64.7602	58.9927	258.239	104.893	143.719	92.0478	295.1	242.609	641.066		218.586	451.39	241.292	532.505	119.823	135.044	97.8165	93.2201	258.239	137.553	143.719	128.221	325.948	302.817	641.066		283.107	149.759	136.498	423.277		283.107	483.004	729.243	780.093		PGA53	1.70609	0.255955	0.148677	2.57586	0.193074
PGA7		1374.09	6978.52	1615.29	7515.84	3021.76	1477.04	1302.76	1198.99	2246.24	230.893	283.719	140.048	2724.1	1828.61	2664.07		1501.08	8433.37	1615.29	8340.68	3989.16	3559.43	1967.74	1894.65	2246.24	302.785	283.719	195.084	3008.86	2282.41	2664.07		4573.17	2036.21	260.529	2651.78		4573.17	6567.22	1391.89	4887.19		PGA7	1.43603	0.216017	0.136712	0.304359	0.0539235
PHO89		846.094	1782.52	903.292	1989.84	924.765	654.039	32.7602	19.9927	89.239	68.8929	81.7191	46.0478	508.1	357.609	323.066		924.288	2154.13	903.292	2208.22	1220.82	1576.13	49.4824	31.5924	89.239	90.3437	81.7191	64.1438	561.214	446.356	323.066		1497.81	56.7713	78.7356	443.545		1497.81	183.1	420.647	817.447		PHO89	0.122245	0.00439048	0.00711723	0.280841	0.00474251
PHR1		3664.09	7632.52	4072.29	8429.84	3667.76	1892.04	366.76	325.993	911.239	89.8929	78.7191	69.0478	377.1	435.609	876.066		4002.72	9223.71	4072.29	9354.98	4841.97	4559.52	553.97	515.133	911.239	117.882	78.7191	96.1825	416.52	543.713	876.066		6009.2	660.114	97.5946	612.099		6009.2	2129.01	521.402	1128.09		PHR1	0.354292	0.0101115	0.0129764	0.0867673	0.0061797
PHR2		737.094	988.52	851.292	1084.84	996.765	367.039	406.76	369.993	731.239	240.893	281.719	221.048	1107.1	815.609	1901.07		805.214	1194.6	851.292	1203.9	1315.87	884.506	614.387	584.662	731.239	315.898	281.719	307.916	1222.83	1018.02	1901.07		1042.56	643.429	301.844	1380.64		1042.56	2075.2	1612.61	2544.49		PHR2	1.99048	0.0209651	0.0248356	1.54678	0.000791232
PIL1		5738.09	7381.52	6175.29	7946.84	2253.76	1895.04	1380.76	1517.99	3434.24	1353.89	1710.72	1075.05	2607.1	2121.61	5714.07		6268.39	8920.38	6175.29	8818.98	2975.29	4566.75	2085.56	2398.73	3434.24	1775.45	1710.72	1497.52	2879.63	2648.12	5714.07		6287.52	2639.51	1661.23	3747.27		6287.52	8512.99	8875.17	6906.16		PIL1	1.35395	0.0371887	0.0369488	1.41155	0.0129186
PIR1		7471.09	1993.52	8155.29	2080.84	3470.76	2936.04	1139.76	1187.99	2107.24	661.893	991.719	805.048	6627.1	6667.61	8381.07		8161.55	2409.12	8155.29	2309.21	4581.91	7075.4	1721.54	1877.26	2107.24	867.983	991.719	1121.42	7319.85	8322.29	8381.07		5448.75	1902.01	993.707	8007.73		5448.75	6134.41	5308.91	14758.1		PIR1	1.12584	0.0662005	0.0556084	0.974336	0.0292266
PLB5		231.094	408.52	263.292	427.844	371.765	129.039	54.7602	48.9927	99.239	29.8929	43.7191	38.0478	155.1	114.609	158.066		252.451	493.687	263.292	474.798	490.783	310.963	82.7121	77.4181	99.239	39.2005	43.7191	53	171.313	143.051	158.066		380.996	86.4564	45.3065	157.477		380.996	278.841	242.051	290.227		PLB5	0.731874	0.00407253	0.0069685	0.635313	0.00200306
POL1		61.094	130.52	70.2919	119.844	49.7649	24.0385	22.7602	13.9927	25.239	14.8929	6.71909	8.04781	1	1	1		66.7401	157.731	70.2919	132.996	65.6968	57.9291	34.378	22.1112	25.239	19.5301	6.71909	11.2105	1	1	1		91.8975	27.2427	12.4865	1		91.8975	87.8638	66.7097	1.84298		POL1	0.956107	0.0384528	0.0377983	0.725915	0.0167555
PRA1		2050.09	23608.5	2497.29	26134.8	1580.76	1155.04	66.7602	85.9927	803.239	111.893	114.719	51.0478	721.1	349.609	1538.07		2239.56	28530.3	2497.29	29003	2086.84	2783.46	100.837	135.885	803.239	146.732	114.719	71.1088	796.479	436.371	1538.07		11190.1	346.654	110.853	923.638		11190.1	1118.03	592.238	1702.25		PRA1	0.099913	0.224528	0.139237	0.0529252	0.215583
RBR1		90.094	84.5205	129.292	73.8437	162.765	40.0385	16.7602	19.9927	134.239	22.8929	14.7191	13.0478	51.1004	18.6093	75.0657		98.4203	102.141	129.292	81.9478	214.873	96.4866	25.3153	31.5924	134.239	30.021	14.7191	18.1754	56.4421	23.2275	75.0657		120.527	63.7156	20.9718	51.5784		120.527	205.497	112.043	95.0582		RBR1	1.70499	0.170336	0.114263	0.929607	0.0114352
RBR2		57.094	116.52	50.2919	147.844	156.765	116.039	348.76	256.993	619.239	38.8929	51.7191	28.0478	155.1	105.609	233.066		62.3705	140.812	50.2919	164.069	206.952	279.635	526.782	406.099	619.239	51.0028	51.7191	39.0701	171.313	131.818	233.066		150.688	517.373	47.264	178.732		150.688	1668.64	252.509	329.401		RBR2	11.0735	0.000846971	0.00244571	1.67571	0.0876818
RBT1		42.094	25.5205	58.2919	32.8437	22.7649	6.03852	1	1	1	1	1	1	1	1	1		45.9842	30.8408	58.2919	36.4482	30.0529	14.5519	1	1	1	1	1	1	1	1	1		36.0283	1	1	1		36.0283	3.22522	5.34253	1.84298		RBT1	0.0895189	0.00576118	0.00844976	0.148287	0.00576118
RBT5		6645.09	37538.5	7578.29	39023.8	13588.8	7244.04	2613.76	2798.99	7227.24	1336.89	1416.72	713.048	10739.1	6916.61	13677.1		7259.22	45364.4	7578.29	43306.6	17939.1	17457	3947.93	4422.96	7227.24	1753.15	1416.72	993.264	11861.7	8633.08	13677.1		23150.8	5199.38	1387.71	11390.6		23150.8	16769.1	7413.89	20992.7		RBT5	0.724345	0.122247	0.0872748	0.320244	0.0701442
RCT1		3097.09	9731.52	3670.29	10665.8	3910.76	2104.04	325.76	293.993	555.239	738.893	928.719	527.048	1895.1	1467.61	3878.07		3383.32	11760.3	3670.29	11836.4	5162.77	5070.41	492.042	464.567	555.239	968.958	928.719	734.169	2093.2	1831.82	3878.07		6813.91	503.949	877.282	2601.03		6813.91	1625.35	4686.9	4793.66		RCT1	0.238533	0.0311491	0.0327066	0.687844	0.039286
RFG1		576.094	758.52	555.292	782.844	506.765	253.039	851.76	698.993	1377.24	932.893	1197.72	843.048	1064.1	777.609	830.066		629.335	916.653	555.292	868.758	669.002	609.784	1286.53	1104.55	1377.24	1223.36	1197.72	1174.35	1175.33	970.586	830.066		708.137	1256.11	1198.48	991.995		708.137	4051.22	6402.9	1828.23		RFG1	5.72095	0.00110125	0.00299267	9.0419	0.000906085
RFX2		277.094	355.52	294.292	413.844	239.765	99.0385	7.76023	1	11.239	13.8929	1.71909	1	7.10041	1	21.0657		302.702	429.638	294.292	459.261	316.524	238.668	11.7214	1	11.239	18.2187	1.71909	1	7.84264	1	21.0657		340.181	7.9868	6.97926	9.96945		340.181	25.7592	37.2869	18.3735		RFX2	0.075722	0.000335936	0.00110847	0.109609	0.000332988
RHR2		1739.09	752.52	2011.29	852.844	1211.76	544.039	212.76	229.993	965.239	143.893	157.719	86.0478	530.1	406.609	562.066		1899.82	909.402	2011.29	946.44	1599.7	1311.05	321.362	363.434	965.239	188.696	157.719	119.863	585.513	507.516	562.066		1446.28	550.012	155.426	551.698		1446.28	1773.91	830.369	1016.77		RHR2	1.22653	0.0239557	0.0273272	0.574139	0.00251334
RIM101		7090.09	4789.52	8296.29	4943.84	7170.76	3828.04	1106.76	1027.99	1501.24	731.893	864.719	552.048	3282.1	3193.61	3207.07		7745.34	5788.02	8296.29	5486.41	9466.44	9224.98	1671.7	1624.43	1501.24	959.778	864.719	768.994	3625.19	3986.16	3207.07		7667.91	1599.12	864.497	3606.14		7667.91	5157.52	4618.6	6646.05		RIM101	0.67261	0.000547437	0.00168599	0.602328	0.000273646
RNR22		5482.09	3580.52	6264.29	3989.84	4644.76	2301.04	767.76	791.993	1160.24	595.893	998.719	598.048	1868.1	1804.61	2223.07		5988.74	4326.97	6264.29	4427.71	6131.75	5545.15	1159.66	1251.51	1160.24	781.433	998.719	833.071	2063.38	2252.45	2223.07		5447.44	1190.47	871.074	2179.63		5447.44	3839.52	4653.74	4017.03		RNR22	0.70483	7.55903e-05	0.000436532	0.854299	4.82251e-05
ROB1		354.094	395.52	392.292	418.844	293.765	174.039	770.76	635.993	1227.24	1.89294	1.71909	1	295.1	264.609	338.066		386.818	477.977	392.292	464.81	387.812	419.406	1164.19	1004.99	1227.24	2.48233	1.71909	1.39298	325.948	330.277	338.066		421.519	1132.14	1.8648	331.43		421.519	3651.4	9.96275	610.821		ROB1	8.66248	1.93073e-06	2.9737e-05	0.0236353	5.35063e-07
RPN4		479.094	351.52	522.292	361.844	512.765	276.039	747.76	951.993	1289.24	482.893	702.719	553.048	1914.1	1735.61	1653.07		523.371	424.804	522.292	401.555	676.923	665.21	1129.45	1504.34	1289.24	633.249	702.719	770.387	2114.19	2166.33	1653.07		535.692	1307.67	702.118	1977.86		535.692	4217.54	3751.09	3645.17		RPN4	7.87306	0.000109569	0.000506352	7.00231	0.0593905
RTA3		7.09399	14.5205	21.2919	2.84374	1.76489	1	1	1	1	0.892938	0.719086	1	1	1	1		7.74959	17.5476	21.2919	3.15583	2.32991	2.40985	1	1	1	1.17097	0.719086	1	1	1	1		9.08079	1	0.963351	1		9.08079	3.22522	5.14673	1.84298		RTA3	0.355169	0.148968	0.103494	0.566771	0.147447
SAP1		79.094	75.5205	67.2919	61.8437	52.7649	12.0385	0.760229	3.99268	6.23903	1	1	1	1	1	1		86.4037	91.2646	67.2919	68.6308	69.6572	29.011	1.14828	6.30922	6.23903	1	1	1	1	1	1		68.7099	4.56551	1	1		68.7099	14.7248	5.34253	1.84298		SAP1	0.214304	0.00179236	0.00424661	0.0777549	0.00129413
SAP10		8.09399	22.5205	13.2919	25.8437	14.7649	1	7.76023	1	18.239	10.8929	6.71909	2.04781	12.1004	5.60928	18.0657		8.84201	27.2154	13.2919	28.68	19.4918	2.40985	11.7214	1.5802	18.239	14.2846	6.71909	2.85257	13.3653	7.00132	18.0657		16.6552	10.5135	7.95209	12.8108		16.6552	33.9084	42.4843	23.6101		SAP10	2.03591	0.407556	0.22283	2.55082	0.22784
SAP2		6.09399	1.52046	4.29192	9.84374	1	1	20.7602	38.9927	320.239	1	1	1	1	1	1		6.65718	1.83743	4.29192	10.9241	1.32014	2.40985	31.3571	61.6161	320.239	1	1	1	1	1	1		4.57343	137.737	1	1		4.57343	444.233	5.34253	1.84298		SAP2	97.1335	0.0621043	0.0536303	1.16817	0.147681
SAP4		2636.09	2643.52	2649.29	2853.84	2222.76	562.039	1	1	1	13.8929	1	7.04781	1	1	1		2879.72	3194.63	2649.29	3167.04	2934.37	1354.43	1	1	1	18.2187	1	9.81748	1	1	1		2696.58	1	9.67873	1		2696.58	3.22522	51.7089	1.84298		SAP4	0.00119604	0.000315539	0.00107971	0.0191757	0.000321895
SAP5		8826.09	13279.5	9586.29	14592.8	8715.76	2864.04	1	1	1	12.8929	6.71909	17.0478	87.1004	78.6093	114.066		9641.78	16048	9586.29	16194.3	11506.1	6901.89	1	1	1	16.9073	6.71909	23.7473	96.2053	98.1175	114.066		11646.4	1	15.7912	102.796		11646.4	3.22522	84.3652	189.452		SAP5	0.000276929	0.00128565	0.00335977	0.00724389	0.00129501
SAP6		2719.09	2945.52	2925.29	3304.84	1271.76	405.039	1	1	1	1	1	1	1	1	1		2970.39	3559.59	2925.29	3667.54	1678.91	976.08	1	1	1	1	1	1	1	1	1		2629.63	1	1	1		2629.63	3.22522	5.34253	1.84298		SAP6	0.00122649	0.00463273	0.00730352	0.00203166	0.00463273
SAP9		2890.09	3583.52	3193.29	3925.84	3883.76	1905.04	509.76	516.993	910.239	271.893	405.719	251.048	2046.1	1560.61	2961.07		3157.19	4330.6	3193.29	4356.69	5127.13	4590.85	769.963	816.951	910.239	356.551	405.719	349.705	2259.98	1947.9	2961.07		4125.96	832.384	370.658	2389.65		4125.96	2684.62	1980.25	4404.09		SAP9	0.650666	0.000218598	0.00085932	0.47995	9.48723e-05
SCW11		224.094	85.5205	237.292	121.844	192.765	94.0385	103.76	61.9927	170.239	42.8929	30.7191	35.0478	149.1	111.609	156.066		244.804	103.349	237.292	135.216	254.477	226.618	156.724	97.9607	170.239	56.2483	30.7191	48.821	164.686	139.307	156.066		200.293	141.641	45.2628	153.353		200.293	456.824	241.818	282.627		SCW11	2.28078	0.195915	0.127483	1.20732	0.00514422
SCW4		35.094	73.5205	26.2919	93.8437	123.765	70.0385	674.76	454.993	810.239	25.8929	21.7191	7.04781	194.1	102.609	75.0657		38.3373	88.8476	26.2919	104.143	163.387	168.782	1019.19	718.978	810.239	33.9551	21.7191	9.81748	214.39	128.073	75.0657		98.2982	849.468	21.8305	139.176		98.2982	2739.72	116.63	256.5		SCW4	27.8715	1.14885e-05	0.000151668	1.1865	0.0728641
SEF1		311.094	274.52	342.292	308.844	649.765	269.039	213.76	272.993	337.239	44.8929	45.7191	50.0478	269.1	180.609	268.066		339.845	331.751	342.292	342.738	857.783	648.341	322.872	431.382	337.239	58.871	45.7191	69.7158	297.23	225.43	268.066		477.125	363.831	58.102	263.575		477.125	1173.44	310.411	485.766		SEF1	2.45939	0.430992	0.234257	0.650587	0.0165829
SEF2		143.094	239.52	132.292	248.844	238.765	68.0385	213.76	166.993	437.239	68.8929	64.7191	60.0478	422.1	234.609	319.066		156.318	289.455	132.292	276.153	315.204	163.962	322.872	263.881	437.239	90.3437	64.7191	83.6456	466.224	292.831	319.066		222.231	341.331	79.5695	359.374		222.231	1100.87	425.102	662.32		SEF2	4.95371	0.079994	0.062598	1.91289	0.0207409
SGA1		139.094	112.52	121.292	109.844	194.765	62.0385	38.7602	32.9927	101.239	20.8929	27.7191	24.0478	51.1004	24.6093	65.0657		151.949	135.978	121.292	121.899	257.118	149.503	58.545	52.135	101.239	27.3983	27.7191	33.4982	56.4421	30.7165	65.0657		156.29	70.6397	29.5385	50.7414		156.29	227.828	157.81	93.5157		SGA1	1.45773	0.0322999	0.0331612	1.00973	0.00430798
SIN3		304.094	302.52	389.292	368.844	218.765	119.039	236.76	228.993	468.239	105.893	140.719	120.048	344.1	321.609	346.066		332.198	365.588	389.292	409.323	288.801	286.864	357.612	361.854	468.239	138.864	140.719	167.225	380.07	401.422	346.066		345.344	395.902	148.936	375.853		345.344	1276.87	795.695	692.691		SIN3	3.69738	0.233851	0.141228	2.30406	0.000415122
SIT1		752.094	2431.52	837.292	2660.84	1630.76	723.039	251.76	314.993	584.239	162.893	162.719	111.048	1239.1	876.609	2046.07		821.601	2938.43	837.292	2952.86	2152.84	1742.41	380.269	497.751	584.239	213.612	162.719	154.688	1368.63	1094.15	2046.07		1907.57	487.42	177.006	1502.95		1907.57	1572.03	945.661	2769.91		SIT1	0.824102	0.042171	0.038202	0.495741	0.019139
SMC2		49.094	83.5205	39.2919	103.844	29.7649	1	26.7602	10.9927	27.239	10.8929	18.7191	16.0478	3.10041	1	16.0657		53.6311	100.932	39.2919	115.24	39.2939	2.40985	40.4197	17.3706	27.239	14.2846	18.7191	22.3543	3.4245	1.24817	16.0657		58.4666	28.3431	18.4527	6.9128		58.4666	91.4128	98.584	12.7402		SMC2	1.56351	0.278255	0.158708	1.68616	0.15774
SOD4		243.094	294.52	241.292	364.844	238.765	117.039	43.7602	56.9927	238.239	41.8929	38.7191	37.0478	360.1	240.609	432.066		265.56	355.921	241.292	404.884	315.204	282.045	66.0972	90.0597	238.239	54.9369	38.7191	51.607	397.743	300.32	432.066		310.818	131.465	48.421	376.71		310.818	424.004	258.691	694.27		SOD4	1.36416	0.00950965	0.0123759	0.832291	0.000182409
SOD5		40524.1	50504.5	45886.3	54901.8	31343.8	18527	291.76	321.993	561.239	310.893	363.719	240.048	2038.1	1268.61	2582.07		44269.2	61033.5	45886.3	60927.1	41378.3	44647.3	440.687	508.812	561.239	407.694	363.719	334.383	2251.15	1583.44	2582.07		49690.3	503.579	368.599	2138.88		49690.3	1624.15	1969.25	3941.93		SOD5	0.0326855	3.49404e-05	0.000293496	0.0396305	3.43192e-05
SOD6		1058.09	244.52	1220.29	255.844	1130.76	619.039	60.7602	57.9927	51.239	82.8929	110.719	90.0478	400.1	440.609	240.066		1155.88	295.497	1220.29	283.922	1492.77	1491.79	91.7747	91.6399	51.239	108.703	110.719	125.435	441.924	549.954	240.066		990.025	78.2179	114.952	410.648		990.025	252.27	614.136	756.818		SOD6	0.254812	0.0295371	0.0317352	0.620324	0.0345944
SOG2		115.094	227.52	111.292	217.844	140.765	60.0385	89.7602	61.9927	126.239	27.8929	47.7191	40.0478	96.1004	111.609	115.066		125.731	274.953	111.292	241.751	185.83	144.684	135.578	97.9607	126.239	36.5778	47.7191	55.7859	106.146	139.307	115.066		180.707	119.926	46.6943	120.173		180.707	386.787	249.466	221.477		SOG2	2.14041	0.173604	0.114579	1.3805	0.0116988
SSB1		1176.09	1355.52	1375.29	1445.84	814.765	331.039	477.76	390.993	1868.24	285.893	274.719	248.048	969.1	874.609	1509.07		1284.79	1638.11	1375.29	1604.52	1075.61	797.752	721.629	617.846	1868.24	374.91	274.719	345.527	1070.4	1091.66	1509.07		1296.01	1069.24	331.718	1223.71		1296.01	3448.53	1772.22	2255.28		SSB1	2.66088	0.507791	0.271213	1.36744	0.00156567
STF2		36762.1	10997.5	42001.3	12288.8	25707.8	16907	7445.76	6707.99	8572.24	8106.89	11485.7	10045	29211.1	27718.6	24004.1		40159.6	13290.2	42001.3	13637.5	33937.9	40743.4	11246.4	10600	8572.24	10631.1	11485.7	13992.6	32264.6	34597.4	24004.1		30628.3	10139.5	12036.5	30288.7		30628.3	32702.2	64305.2	55821.6		STF2	1.06771	0.0399044	0.0379327	2.09953	0.0564275
STP2		3321.09	2612.52	3716.29	2880.84	5152.76	2712.04	1527.76	1540.99	2337.24	782.893	1112.72	702.048	2806.1	2261.61	2185.07		3628.02	3157.17	3716.29	3197	6802.39	6535.59	2307.59	2435.07	2337.24	1026.66	1112.72	977.941	3099.43	2822.87	2185.07		4506.08	2359.97	1039.11	2702.45		4506.08	7611.41	5551.45	4980.58		STP2	1.68914	0.0715798	0.0575128	1.23199	0.0110314
SUT1		236.094	196.52	204.292	211.844	236.765	91.0385	861.76	763.993	1479.24	87.8929	101.719	115.048	266.1	176.609	202.066		257.913	237.49	204.292	235.093	312.564	219.389	1301.64	1207.26	1479.24	115.26	101.719	160.26	293.917	220.438	202.066		244.457	1329.38	125.746	238.807		244.457	4287.54	671.803	440.117		SUT1	17.539	2.71883e-07	2.5124e-05	2.74815	0.00230802
TEC1		10612.1	3236.52	11927.3	3676.84	14003.8	7019.04	58.7602	42.9927	102.239	255.893	357.719	337.048	1525.1	1129.61	709.066		11592.8	3911.25	11927.3	4080.36	18487	16914.8	88.7539	67.9369	102.239	335.569	357.719	469.502	1684.52	1409.94	709.066		11152.3	86.3099	387.597	1267.84		11152.3	278.368	2070.75	2336.62		TEC1	0.0249607	0.0198885	0.0238662	0.18568	0.0223369
TPK1		109.094	119.52	150.292	150.844	373.765	126.039	109.76	145.993	215.239	28.8929	56.7191	32.0478	415.1	285.609	230.066		119.176	144.437	150.292	167.398	493.423	303.733	165.786	230.697	215.239	37.8892	56.7191	44.6421	458.492	356.488	230.066		229.743	203.908	46.4168	348.349		229.743	657.646	247.983	642.001		TPK1	2.86253	0.776169	0.392677	1.07939	0.0719303
TPK2		418.094	249.52	422.292	301.844	187.765	121.039	128.76	138.993	235.239	62.8929	90.7191	49.0478	247.1	179.609	287.066		456.733	301.539	422.292	334.97	247.877	291.684	194.485	219.636	235.239	82.4756	90.7191	68.3228	272.93	224.182	287.066		342.516	216.453	80.5058	261.393		342.516	698.109	430.105	481.743		TPK2	2.03818	0.0366936	0.0368531	1.25572	0.00100705
TPS2		6723.09	5434.52	7851.29	5929.84	5040.76	2397.04	260.76	283.993	395.239	1313.89	1898.72	1494.05	2778.1	3187.61	2494.07		7344.43	6567.48	7851.29	6580.62	6654.53	5776.49	393.863	448.765	395.239	1722.99	1898.72	2081.18	3068.5	3978.67	2494.07		6795.81	412.622	1900.97	3180.41		6795.81	1330.8	10156	5861.45		TPS2	0.195826	1.48043e-06	2.9328e-05	1.49445	9.62489e-06
TRR1		440.094	656.52	578.292	732.844	538.765	154.039	324.76	225.993	342.239	49.8929	47.7191	38.0478	164.1	111.609	325.066		480.766	793.389	578.292	813.27	711.247	371.209	490.531	357.113	342.239	65.4278	47.7191	53	181.254	139.307	325.066		624.696	396.628	55.3823	215.209		624.696	1279.21	295.882	396.627		TRR1	2.04774	0.0786213	0.0620907	0.473641	0.00106933
TRX1		1046.09	1093.52	987.292	1272.84	1023.76	445.039	684.76	561.993	1249.24	209.893	315.719	237.048	1351.1	921.609	1542.07		1142.77	1321.49	987.292	1412.53	1351.52	1072.47	1034.29	888.06	1249.24	275.246	315.719	330.204	1492.33	1150.32	1542.07		1214.68	1057.2	307.056	1394.91		1214.68	3409.69	1640.46	2570.79		TRX1	2.80707	0.241797	0.144142	1.35053	4.83701e-05
TTR1		755.094	550.52	813.292	640.844	361.765	176.039	245.76	195.993	300.239	142.893	151.719	103.048	509.1	409.609	788.066		824.878	665.29	813.292	711.174	477.581	424.226	371.206	309.707	300.239	187.385	151.719	143.544	562.318	511.261	788.066		652.74	327.051	160.883	620.548		652.74	1054.81	859.52	1143.66		TTR1	1.61597	0.0150258	0.0185118	1.31679	0.00181992
TUP1		579.094	696.52	611.292	690.844	402.765	194.039	271.76	221.993	498.239	141.893	190.719	125.048	435.1	387.609	458.066		632.612	841.728	611.292	766.661	531.707	467.603	410.478	350.792	498.239	186.073	190.719	174.19	480.583	483.801	458.066		641.934	419.836	183.661	474.15		641.934	1354.06	981.213	873.851		TUP1	2.10935	0.0406871	0.0379327	1.52853	0.000961573
TYE7		9360.09	4005.52	9856.29	4366.84	7906.76	3827.04	987.76	1394.99	1580.24	2303.89	3256.72	2105.05	5970.1	4989.61	5924.07		10225.1	4840.57	9856.29	4846.09	10438.1	9222.57	1491.95	2204.36	1580.24	3021.24	3256.72	2932.3	6594.17	6227.86	5924.07		8238.12	1758.85	3070.09	6248.7		8238.12	5672.68	16402	11516.3		TYE7	0.68859	0.00483414	0.00744451	1.99099	0.014129
UCF1		56702.1	52377.5	61026.3	56435.8	70298.8	38733	30936.8	33270	42453.2	19885.9	29800.7	20933	86881.1	72760.6	75335.1		61942.4	63296.9	61026.3	62629.4	92804.4	93340.6	46728.2	52573.2	42453.2	26077.7	29800.7	29159.4	95963	90817.4	75335.1		72506.7	47251.5	28345.9	87371.8		72506.7	152396	151439	161025		UCF1	2.10183	0.035553	0.0361	2.08862	0.00242936
UGA32		42.094	111.52	37.2919	131.844	61.7649	25.0385	69.7602	53.9927	76.239	16.8929	17.7191	18.0478	33.1004	17.6093	41.0657		45.9842	134.77	37.2919	146.313	81.5385	60.339	105.369	85.3191	76.239	22.1528	17.7191	25.1403	36.5605	21.9793	41.0657		84.3727	88.9756	21.6707	33.2018		84.3727	286.966	115.777	61.1905		UGA32	3.40117	0.874751	0.434554	1.3722	0.057465
UGP1		1717.09	1133.52	1891.29	1202.84	1217.76	497.039	222.76	219.993	422.239	308.893	417.719	296.048	749.1	915.609	958.066		1875.78	1369.83	1891.29	1334.85	1607.62	1197.79	336.466	347.632	422.239	405.071	417.719	412.39	827.406	1142.83	958.066		1546.19	368.779	411.727	976.102		1546.19	1189.39	2199.66	1798.94		UGP1	0.769239	0.000278725	0.000990457	1.42263	0.000339589
UME6		470.094	385.52	429.292	397.844	500.765	213.039	1	1	1	13.8929	13.7191	8.04781	32.1004	18.6093	27.0657		513.539	465.892	429.292	441.505	661.081	513.39	1	1	1	18.2187	13.7191	11.2105	35.456	23.2275	27.0657		504.117	1	14.3828	28.5831		504.117	3.22522	76.8403	52.6781		UME6	0.00639776	2.21086e-05	0.000229152	0.152426	2.64597e-05
UPC2		247.094	470.52	283.292	507.844	771.765	313.039	96.7602	94.9927	150.239	54.8929	104.719	79.0478	275.1	275.609	314.066		269.93	568.612	283.292	563.578	1018.84	754.374	146.151	150.107	150.239	71.9846	104.719	110.112	303.857	344.006	314.066		576.438	148.832	95.6053	320.643		576.438	480.017	510.774	590.94		UPC2	0.832729	0.0406126	0.0379327	0.886088	0.0259425
WH11		83155.1	10182.5	89730.3	10881.8	10146.8	17370	399.76	587.993	3563.24	5751.89	5913.72	4679.05	8547.1	11125.6	54570.1		90840.1	12305.3	89730.3	12076.1	13395.2	41859.1	603.814	929.145	3563.24	7542.83	5913.72	6517.84	9440.55	13886.6	54570.1		43367.7	1698.73	6658.13	25965.7		43367.7	5478.78	35571.2	47854.5		WH11	0.126333	0.109833	0.0806258	0.820225	0.150726
YHB1		13174.1	5644.52	14172.3	6081.84	17031.8	5851.04	20301.8	12992	16605.2	1423.89	1836.72	2962.05	5889.1	5128.61	3380.07		14391.6	6821.26	14172.3	6749.3	22484.4	14100.1	30664.6	20529.9	16605.2	1867.24	1836.72	4126.08	6504.7	6401.36	3380.07		13119.8	22599.9	2610.02	5428.71		13119.8	72889.7	13944.1	10005		YHB1	5.55569	0.070497	0.0572163	1.06283	0.0207516
YWP1		2396.09	214.52	2646.29	257.844	385.765	314.039	362.76	387.993	401.239	4211.89	5767.72	4302.05	3472.1	5675.61	6038.07		2617.54	259.243	2646.29	286.141	509.265	756.784	547.928	613.105	401.239	5523.33	5767.72	5992.68	3835.05	7084.11	6038.07		1179.21	520.757	5761.24	5652.41		1179.21	1679.56	30779.6	10417.3		YWP1	1.42431	0.366612	0.202844	26.1019	0.000284634
ZAP1		203.094	791.52	233.292	928.844	204.765	58.0385	68.7602	120.993	215.239	36.8929	50.7191	20.0478	83.1004	75.6093	213.066		221.863	956.533	233.292	1030.78	270.319	139.864	103.858	191.192	215.239	48.3801	50.7191	27.9263	91.7871	94.373	213.066		475.442	170.097	42.3418	133.075		475.442	548.598	226.212	245.256		ZAP1	1.15387	0.248611	0.147254	0.475794	0.116242
ZCF20		214.094	442.52	209.292	496.844	214.765	90.0385	135.76	106.993	255.239	21.8929	23.7191	25.0478	142.1	116.609	156.066		233.88	534.775	209.292	551.37	283.52	216.979	205.058	169.07	255.239	28.7096	23.7191	34.8912	156.955	145.548	156.066		338.303	209.789	29.1066	152.856		338.303	676.615	155.503	281.711		ZCF20	2.00003	0.22885	0.139853	0.459656	0.0147149
ZCF3		150.094	114.52	149.292	118.844	182.765	84.0385	157.76	118.993	211.239	29.8929	37.7191	30.0478	187.1	145.609	207.066		163.965	138.395	149.292	131.886	241.276	202.52	238.288	188.032	211.239	39.2005	37.7191	41.8561	206.659	181.745	207.066		171.222	212.52	39.5919	198.49		171.222	685.422	211.521	365.813		ZCF3	4.00311	0.171889	0.114263	1.23536	0.00128659
ZCF31		81.094	206.52	94.2919	233.844	126.765	64.0385	53.7602	59.9927	84.239	1	1	1	1	8.60928	35.0657		88.5885	249.575	94.2919	259.507	167.348	154.323	81.2017	94.8003	84.239	1	1	1	1	10.7458	35.0657		168.939	86.747	1	15.6038		168.939	279.778	5.34253	28.7576		ZCF31	1.65609	0.103705	0.078544	0.031624	0.00647684
ZCF34		40.094	67.5205	33.2919	80.8437	28.7649	1	18.7602	16.9927	48.239	13.8929	9.71909	9.04781	2.10041	9.60928	17.0657		43.7994	81.5968	33.2919	89.716	37.9738	2.40985	28.3362	26.8518	48.239	18.2187	9.71909	12.6035	2.31997	11.994	17.0657		48.1313	34.4757	13.5137	10.4599		48.1313	111.192	72.1976	19.2774		ZCF34	2.31017	0.515499	0.273748	1.50001	0.118993
ZCF39		560.094	683.52	621.292	728.844	807.765	396.039	116.76	137.993	240.239	68.8929	82.7191	48.0478	287.1	180.609	368.066		611.857	826.017	621.292	808.831	1066.37	954.392	176.359	218.056	240.239	90.3437	82.7191	66.9298	317.112	225.43	368.066		814.792	211.551	79.9975	303.536		814.792	682.299	427.389	559.412		ZCF39	0.837391	0.000833909	0.00244571	0.524538	0.000245517
ZCF7		10.094	19.5205	2.29192	19.8437	5.76489	1	20.7602	1	25.239	1.89294	1	0.0478095	1	1	1		11.0268	23.59	2.29192	22.0215	7.61048	2.40985	31.3571	1	25.239	2.48233	1	0.0665979	1	1	1		11.4918	19.1987	1.18298	1		11.4918	61.92	6.32009	1.84298		ZCF7	5.38821	0.381844	0.210014	0.549966	0.109396
ZRT1		1367.09	18363.5	1464.29	20479.8	1250.76	910.039	45.7602	69.9927	402.239	132.893	111.719	56.0478	551.1	255.609	930.066		1493.44	22191.9	1464.29	22727.4	1651.19	2193.05	69.1181	110.602	402.239	174.271	111.719	78.0737	608.708	319.043	930.066		8620.21	193.986	121.355	619.272		8620.21	625.649	648.341	1141.31		ZRT1	0.0725793	0.230061	0.139853	0.0752117	0.226454
ZRT2		3436.09	14009.5	3815.29	15876.8	1877.76	901.039	1579.76	2281.99	3831.24	702.893	1110.72	602.048	2340.1	2075.61	3593.07		3753.65	16930.2	3815.29	17619.3	2478.92	2171.36	2386.13	3606	3831.24	921.749	1110.72	838.643	2584.72	2590.71	3593.07		7794.77	3274.46	957.037	2922.83		7794.77	10560.8	5113	5386.73		ZRT2	1.35486	0.340261	0.190546	0.655952	0.164813
orf19.1424		85.094	175.52	113.292	209.844	78.7649	30.0385	95.7602	74.9927	140.239	31.8929	48.7191	38.0478	94.1004	56.6093	157.066		92.9582	212.112	113.292	232.873	103.981	72.3882	144.64	118.503	140.239	41.8233	48.7191	53	103.937	70.6578	157.066		137.934	134.461	47.8474	110.554		137.934	433.665	255.626	203.748		orf19.1424	3.14401	0.934092	0.461551	1.85325	0.0601418
orf19.1534		730.094	3166.52	744.292	3451.84	887.765	370.039	41.7602	68.9927	119.239	129.893	177.719	94.0478	688.1	572.609	666.066		797.568	3826.66	744.292	3830.67	1171.98	891.736	63.0764	109.022	119.239	170.337	177.719	131.007	760.029	714.712	666.066		1877.15	97.1125	159.688	713.602		1877.15	313.209	853.136	1315.16		orf19.1534	0.166853	0.0906909	0.069832	0.454485	0.100369
orf19.1691		65.094	138.52	41.2919	165.844	51.7649	1	146.76	154.993	531.239	168.893	242.719	156.048	37.1004	24.6093	408.066		71.1098	167.399	41.2919	184.044	68.3371	2.40985	221.673	244.919	531.239	221.48	242.719	217.372	40.9786	30.7165	408.066		89.0986	332.61	227.19	159.92		89.0986	1072.74	1213.77	294.731		orf19.1691	12.0399	0.0167871	0.0204096	13.6228	0.015065
orf19.1862		1561.09	1370.52	1832.29	1435.84	828.765	765.039	488.76	541.993	1006.24	466.893	612.719	462.048	2071.1	1852.61	3981.07		1705.37	1656.24	1832.29	1593.42	1094.09	1843.62	738.244	856.456	1006.24	612.267	612.719	643.625	2287.6	2312.37	3981.07		1620.84	866.979	622.87	2860.34		1620.84	2796.2	3327.7	5271.57		orf19.1862	1.72515	0.00328271	0.00606643	2.05307	0.000518699
orf19.2125		2647.09	4152.52	2939.29	4546.84	2619.76	1426.04	1859.76	1684.99	1898.24	688.893	1024.72	912.048	4614.1	3517.61	3538.07		2891.73	5018.22	2939.29	5045.84	3458.46	3436.53	2809.06	2662.62	1898.24	903.39	1024.72	1270.47	5096.42	4390.56	3538.07		3798.35	2456.64	1066.19	4341.68		3798.35	7923.2	5696.16	8001.66		orf19.2125	2.08596	0.066159	0.0556084	1.49964	0.00245936
orf19.3615		394.094	556.52	447.292	629.844	513.765	261.039	180.76	147.993	225.239	38.8929	49.7191	51.0478	144.1	75.6093	334.066		430.515	672.541	447.292	698.967	678.243	629.063	273.028	233.858	225.239	51.0028	49.7191	71.1088	159.164	94.373	334.066		592.77	244.041	57.2769	195.867		592.77	787.087	306.003	360.981		orf19.3615	1.32781	0.00205256	0.00462586	0.516226	0.000154157
orf19.409		5497.09	3150.52	5863.29	3411.84	5348.76	2837.04	2370.76	2400.99	3755.24	1009.89	1532.72	1103.05	5993.1	4566.61	5157.07		6005.12	3807.33	5863.29	3786.28	7061.13	6836.82	3580.89	3794.04	3755.24	1324.34	1532.72	1536.53	6619.58	5699.89	5157.07		5560	3710.06	1464.53	5825.51		5560	11965.7	7824.28	10736.3		orf19.409	2.15211	0.0691668	0.0572163	1.40725	0.00209109
orf19.411		319.094	403.52	374.292	451.844	572.765	230.039	41.7602	50.9927	70.239	143.893	183.719	94.0478	352.1	295.609	381.066		348.584	487.644	374.292	501.432	756.132	554.357	63.0764	80.5785	70.239	188.696	183.719	131.007	388.906	368.97	381.066		503.74	71.298	167.807	379.647		503.74	229.952	896.516	699.684		orf19.411	0.456488	0.00168524	0.0040977	1.77972	0.00671325
orf19.4174		165.094	289.52	190.292	302.844	321.765	128.039	35.7602	39.9927	66.239	13.8929	17.7191	12.0478	94.1004	65.6093	91.0657		180.352	349.878	190.292	336.08	424.776	308.553	54.0137	63.1963	66.239	18.2187	17.7191	16.7824	103.937	81.8913	91.0657		298.322	61.1497	17.5734	92.298		298.322	197.221	93.8864	170.104		orf19.4174	0.661102	0.00432486	0.00711723	0.314715	0.00173279
orf19.449		6892.09	4189.52	8012.29	4451.84	6776.76	3306.04	1243.76	1361.99	1656.24	1337.89	1924.72	1336.05	3294.1	2801.61	2971.07		7529.04	5062.93	8012.29	4940.42	8946.3	7967.04	1878.63	2152.22	1656.24	1754.47	1924.72	1861.09	3638.44	3496.88	2971.07		7076.34	1895.69	1846.76	3368.79		7076.34	6114.03	9866.36	6208.64		orf19.449	0.86401	0.00130899	0.00335977	1.39428	0.00121346
orf19.4706		574.094	1127.52	606.292	1232.84	846.765	348.039	188.76	189.993	299.239	91.8929	134.719	59.0478	305.1	186.609	962.066		627.15	1362.58	606.292	1368.14	1117.85	838.719	285.111	300.226	299.239	120.505	134.719	82.2526	336.993	232.919	962.066		986.789	294.859	112.492	510.66		986.789	950.984	600.993	941.138		orf19.4706	0.963715	0.0123805	0.0156707	0.609039	0.00394375
orf19.5517		149.094	20.5205	138.292	46.8437	78.7649	20.0385	28.7602	29.9927	63.239	10.8929	4.71909	4.04781	23.1004	20.6093	40.0657		162.873	24.7985	138.292	51.9847	103.981	48.2897	43.4406	47.3944	63.239	14.2846	4.71909	5.63853	25.5152	25.7238	40.0657		88.3698	51.358	8.21408	30.4349		88.3698	165.641	43.8839	56.091		orf19.5517	1.87441	0.302408	0.171426	0.496595	0.0458515
orf19.5626		5825.09	1096.52	6024.29	1207.84	3689.76	2371.04	1486.76	1631.99	2353.24	839.893	1292.72	951.048	2860.1	2533.61	2117.07		6363.44	1325.12	6024.29	1340.4	4871.02	5713.84	2245.66	2578.87	2353.24	1101.41	1292.72	1324.79	3159.07	3162.37	2117.07		4273.02	2392.59	1239.64	2812.84		4273.02	7716.63	6622.81	5184.01		orf19.5626	1.8059	0.219461	0.137015	1.54991	0.0659672
orf19.5848		124.094	211.52	138.292	247.844	234.765	115.039	44.7602	33.9927	52.239	47.8929	49.7191	46.0478	113.1	82.6093	88.0657		135.562	255.617	138.292	275.044	309.923	277.225	67.6077	53.7152	52.239	62.8051	49.7191	64.1438	124.923	103.11	88.0657		231.944	57.854	58.8893	105.366		231.944	186.592	314.618	194.189		orf19.5848	0.804469	0.00636251	0.0089075	1.35644	0.00654462
orf19.6578		2718.09	1731.52	3036.29	1974.84	3716.76	2029.04	93.7602	97.9927	172.239	985.893	1323.72	876.048	2202.1	2015.61	1588.07		2969.29	2092.5	3036.29	2191.57	4906.66	4889.67	141.619	154.848	172.239	1292.86	1323.72	1220.32	2432.29	2515.82	1588.07		3347.67	156.235	1278.97	2178.72		3347.67	503.893	6832.92	4015.36		orf19.6578	0.150521	0.00387736	0.0069685	2.0411	0.0288155
orf19.6660		352.094	178.52	386.292	175.844	248.765	73.0385	62.7602	48.9927	177.239	73.8929	93.7191	51.0478	219.1	233.609	365.066		384.634	215.738	386.292	195.142	328.405	176.012	94.7956	77.4181	177.239	96.9006	93.7191	71.1088	242.004	291.583	365.066		281.037	116.484	87.2428	299.551		281.037	375.687	466.097	552.068		orf19.6660	1.33679	0.0311163	0.0327066	1.65849	0.0124139
orf19.670.2		20156.1	19107.5	22848.3	21019.8	18914.8	12845	15646.8	13904	18452.2	8770.89	12491.7	8543.05	22259.1	17759.6	16131.1		22018.9	23091	22848.3	23326.7	24970.2	30954.6	23633.5	21971.1	18452.2	11501.8	12491.7	11900.3	24585.9	22167	16131.1		24534.9	21352.3	11964.6	20961.3		24534.9	68865.7	63921.4	38631.4		orf19.670.2	2.80684	0.192275	0.126001	2.60532	0.000380032
ARP3		114.094	273.52	130.292	316.844	106.765	47.0385	53.7602	69.9927	142.239	40.8929	41.7191	16.0478	88.1004	108.609	212.066		124.638	330.543	130.292	351.616	140.945	113.356	81.2017	110.602	142.239	53.6255	41.7191	22.3543	97.3098	135.562	212.066		198.565	111.348	39.233	148.313		198.565	359.12	209.603	273.338		ARP3	1.80858	0.236096	0.141658	1.05559	0.0479336
CLN3		810.094	1304.52	860.292	1421.84	1048.76	564.039	199.76	212.993	693.239	301.893	367.719	236.048	889.1	646.609	1068.07		884.961	1576.48	860.292	1577.89	1384.52	1359.25	301.726	336.571	693.239	395.892	367.719	328.811	982.04	807.076	1068.07		1273.9	443.845	364.14	952.394		1273.9	1431.5	1945.43	1755.25		CLN3	1.12372	0.0055662	0.00829543	1.52715	0.00224981
CMK2		183.094	504.52	189.292	557.844	149.765	86.0385	90.7602	104.993	229.239	44.8929	52.7191	21.0478	132.1	118.609	235.066		200.015	609.7	189.292	619.065	197.711	207.34	137.088	165.909	229.239	58.871	52.7191	29.3193	145.909	148.044	235.066		337.187	177.412	46.9698	176.34		337.187	572.193	250.937	324.991		CMK2	1.69696	0.25745	0.148677	0.744208	0.0584758
YRA1		271.094	579.52	296.292	518.844	287.765	98.0385	503.76	421.993	653.239	336.893	367.719	331.048	419.1	361.609	434.066		296.148	700.336	296.292	575.785	379.891	236.258	760.9	666.832	653.239	441.789	367.719	461.144	462.91	451.349	434.066		414.118	693.657	423.551	449.442		414.118	2237.2	2262.83	828.314		YRA1	5.40231	0.0412063	0.0379327	5.46422	0.934851
orf19.3456		1.09399	39.5205	9.29192	22.8437	6.76489	1	0.760229	1	10.239	6.89294	5.71909	1	1	1	1		1.19509	47.7595	9.29192	25.3508	8.93063	2.40985	1.14828	1	10.239	9.03915	5.71909	1	1	1	1		15.823	4.1291	5.25275	1		15.823	13.3173	28.063	1.84298		orf19.3456	0.841642	0.31723	0.178732	1.77356	0.359554
Sum		832537	752583	909478	819537	688924	377401	186696	178455	281994	129816	170236	122209	446779	395366	493482																	Sum	909477	281989	170233	493481
NF		1.09242	1.20848	1	1.10975	1.32014	2.40985	1.51044	1.5802	1	1.31136	1	1.39298	1.10453	1.24817	1																	NF_WT	1	3.22522	5.34253	1.84298
[truncated: 4 more columns]
