# Supplementary material for: Intravital imaging-based genetic screen reveals the transcriptional network governing Candida albicans filamentation during mammalian infection
Source: eLife. 2023 Feb 27;12:e85114. doi: 10.7554/eLife.85114 (PMC9995110; doi:10.7554/eLife.85114)
Supplement: Supplementary file 4. — The gene names; raw nCounter counts for wild type (WT) and the mutant strains; normalized counts; average counts for the strains; counts normalized to WT; fold-change for the gene expression in the mutant relative to WT; the p value calculated using Student’s t test; and the false discovery rate (FDR) calculated using the Benjamini-Yekutieli procedure are provided. Red indicates a gene downregulated by twofold relative to WT with FDR ≤0.1; green indicates a gene upregulated using the same criteria. [file elife-85114-supp4.xlsx]

## Sheet: RPMI+10%Serum
Probe Name		Counts after background subtraction										Normalize count - WT			Normalize count - Δ/EFG1		Normalize count - Δ/TEC1		Normalize count - Δ/EFG1+Δ/TEC1			Avg_Individual samples					Normalize to highest counts					Probe name	Δ+EFG1/WT			Δ+TEC1/WT			Δ+EFG1-Δ+TEC1/WT
		WT_H1	WT_H2	WT_H3	Δ/EFG1.1	Δ/EFG1.2	Δ/TEC1.1	Δ/TEC1.2	Δ/EFG1+Δ/TEC1.1	Δ/EFG1+Δ/TEC1.2		WT_E1	WT_E2	WT_E3	Δ/EFG1.1	Δ/EFG1.2	Δ/TEC1.1	Δ/TEC1.2	Δ/EFG1+Δ/TEC1.1	Δ/EFG1+Δ/TEC1.2		WT_Avg	Δ/EFG1_Avg	Δ/TEC1_Avg	Δ/EFG1+Δ/TEC1_Avg		WT	Δ/EFG1	Δ/TEC1	Δ/EFG1+Δ/TEC1			FC	T-test	FDR	FC	T-test	FDR	FC	T-test	FDR
ACE2		261.562	241.277	209.498	281.946	337.016	353.073	316.888	389.331	373.377		289.071	248.485	209.498	310.643	337.016	353.073	319.221	389.331	379.766		249.018	323.829	336.147	384.549		250.654	323.829	352.616	392.908		ACE2	1.29194	0.0963521	0.119892	1.40678	0.0735718	0.082564	1.56753	0.0200407	0.0314925
ACS1		19954.6	21972.3	19044.5	17617.9	19287	24219.1	23802.9	22031.3	22786.4		22053.2	22628.6	19044.5	19411.1	19287	24219.1	23978.1	22031.3	23176.3		21242.1	19349.1	24098.6	22603.8		21381.7	19349.1	25279.3	23095.2		ACS1	0.904938	0.278872	0.267549	1.18229	0.141075	0.133961	1.08014	0.43002	0.290198
ACS2		2689.56	2871.28	2835.5	3606.95	3704.02	3996.07	4173.89	3933.33	3906.38		2972.42	2957.05	2835.5	3974.07	3704.02	3996.07	4204.61	3933.33	3973.23		2921.66	3839.04	4100.34	3953.28		2940.85	3839.04	4301.23	4039.21		ACS2	1.30542	0.00412374	0.0140568	1.46258	0.0011543	0.00461862	1.37348	0.000384585	0.00313045
ADH5		15924.6	17451.3	21201.5	20647.9	23266	21617.1	21420.9	25113.3	24423.4		17599.3	17972.6	21201.5	22749.5	23266	21617.1	21578.6	25113.3	24841.3		18924.5	23007.8	21597.8	24977.3		19048.8	23007.8	22656	25520.3		ADH5	1.20783	0.0711857	0.0998164	1.18936	0.167881	0.150416	1.33973	0.0264167	0.0372543
AHR1		711.562	709.277	538.498	829.946	924.016	1005.07	914.888	825.331	836.377		786.397	730.465	538.498	914.42	924.016	1005.07	921.622	825.331	850.69		685.12	919.218	963.347	838.011		689.621	919.218	1010.55	856.227		AHR1	1.33293	0.094684	0.119621	1.46536	0.0717229	0.0813103	1.24159	0.2144	0.169669
ALS1		11885.6	12346.3	15774.5	8216.95	8670.02	11312.1	11709.9	12817.3	13119.4		13135.6	12715.1	15774.5	9053.29	8670.02	11312.1	11796.1	12817.3	13343.9		13875.1	8861.65	11554.1	13080.6		13966.2	8861.65	12120.1	13365		ALS1	0.634506	0.027481	0.0523369	0.867819	0.160141	0.144648	0.956949	0.570681	0.364971
ALS2		78.5622	93.277	125.498	89.9455	105.016	89.0726	63.8882	166.331	218.377		86.8246	96.0634	125.498	99.1004	105.016	89.0726	64.3584	166.331	222.114		102.795	102.058	76.7155	194.223		103.471	102.058	80.474	198.444		ALS2	0.986348	0.9644	0.658061	0.777748	0.235978	0.194201	1.91788	0.0377641	0.0488712
ALS3		25020.6	25896.3	20372.5	13829.9	15478	12433.1	12669.9	12834.3	12610.4		27652	26669.9	20372.5	15237.6	15478	12433.1	12763.1	12834.3	12826.2		24898.1	15357.8	12598.1	12830.3		25061.7	15357.8	13215.3	13109.2		ALS3	0.6128	0.0478883	0.0754389	0.527312	0.0250371	0.0347703	0.523075	0.0262676	0.0372543
ALS4		365.562	369.277	260.498	571.946	642.016	1190.07	1238.89	1097.33	1125.38		404.008	380.308	260.498	630.16	642.016	1190.07	1248.01	1097.33	1144.64		348.271	636.088	1219.04	1120.98		350.56	636.088	1278.76	1145.35		ALS4	1.81449	0.0153549	0.0337809	3.64778	0.000754858	0.00381203	3.26721	0.00101002	0.00462926
ALS5		137.562	175.277	121.498	92.9455	101.016	100.073	95.8882	163.331	138.377		152.03	180.513	121.498	102.406	101.016	100.073	96.5939	163.331	140.745		151.347	101.711	98.3332	152.038		152.341	101.711	103.151	155.343		ALS5	0.667651	0.109355	0.132893	0.677105	0.095382	0.102837	1.0197	0.978429	0.572485
ALS6		1	1	1	1	1	1	1	1	1		6.14722	18.823	1	1	1	1	1	1	1		8.65674	1	1	1		8.71362	1	1	1		ALS6	0.114763	0.344328	0.30941	0.114763	0.344328	0.256744	0.114763	0.344328	0.242795
ALS7		501.562	486.277	528.498	477.946	505.016	434.073	427.888	445.331	469.377		554.312	500.803	528.498	526.592	505.016	434.073	431.038	445.331	477.409		527.871	515.804	432.555	461.37		531.339	515.804	453.747	471.399		ALS7	0.970762	0.613905	0.46079	0.85397	0.0174926	0.0273723	0.887191	0.0645893	0.0664003
ALS9		45.5622	50.277	1	25.9455	33.0156	45.0726	39.8882	64.3312	62.3767		50.354	51.7789	1	28.5863	33.0156	45.0726	40.1818	64.3312	63.4442		34.3776	30.801	42.6272	63.8877		34.6035	30.801	44.7156	65.2764		ALS9	0.890111	0.879094	0.616332	1.29223	0.728305	0.478239	1.88641	0.264462	0.200626
AOX2		1981.56	2145.28	2303.5	216.946	306.016	477.073	445.888	312.331	255.377		2189.96	2209.36	2303.5	239.027	306.016	477.073	449.17	312.331	259.747		2234.27	272.521	463.121	286.039		2248.95	272.521	485.811	292.257		AOX2	0.121177	4.02481e-05	0.00400052	0.216017	3.96653e-05	0.00237227	0.129952	3.57059e-05	0.00184994
ARG1		438.562	464.277	484.498	804.946	835.016	593.073	591.888	763.331	684.377		484.686	478.146	484.498	886.875	835.016	593.073	596.245	763.331	696.089		482.443	860.945	594.659	729.71		485.613	860.945	623.793	745.572		ARG1	1.7729	0.000299844	0.00487891	1.28455	4.27052e-05	0.00237227	1.53532	0.00225331	0.00760283
ARG81		192.562	215.277	172.498	216.946	226.016	228.073	242.888	262.331	250.377		212.814	221.708	172.498	239.027	226.016	228.073	244.676	262.331	254.662		202.34	232.521	236.374	258.496		203.669	232.521	247.955	264.115		ARG81	1.14166	0.230901	0.226638	1.21744	0.19549	0.173752	1.29679	0.0654963	0.0667092
BCR1		702.562	731.277	720.498	1000.95	1074.02	892.073	939.888	1021.33	1085.38		776.451	753.122	720.498	1102.82	1074.02	892.073	946.806	1021.33	1103.95		750.023	1088.42	919.439	1062.64		754.951	1088.42	964.486	1085.74		BCR1	1.44171	0.000729556	0.0065923	1.27755	0.0102275	0.018938	1.43816	0.00354602	0.00967855
BRG1		2178.56	2446.28	3135.5	2778.95	3058.02	2903.07	2782.89	3257.33	3140.38		2407.68	2519.35	3135.5	3061.79	3058.02	2903.07	2803.37	3257.33	3194.12		2687.51	3059.9	2853.22	3225.73		2705.17	3059.9	2993.01	3295.84		BRG1	1.13113	0.292204	0.276187	1.1064	0.612965	0.422984	1.21835	0.163644	0.135345
CAP1		717.562	807.277	657.498	697.946	894.016	978.073	967.888	961.331	965.377		793.028	831.392	657.498	768.984	894.016	978.073	975.012	961.331	981.898		760.639	831.5	976.542	971.614		765.637	831.5	1024.39	992.735		CAP1	1.08602	0.4536	0.377015	1.33795	0.0504751	0.0623087	1.29661	0.0541878	0.0602087
CAT1		1815.56	1965.28	1782.5	2201.95	2379.02	2793.07	2704.89	3017.33	3104.38		2006.5	2023.98	1782.5	2426.07	2379.02	2793.07	2724.8	3017.33	3157.5		1937.66	2402.54	2758.93	3087.42		1950.39	2402.54	2894.1	3154.53		CAT1	1.23182	0.0197431	0.0406682	1.48386	0.00417913	0.0110548	1.61738	0.00203089	0.00741219
CDC10		163.562	202.277	143.498	219.946	251.016	196.073	164.888	165.331	196.377		180.764	208.319	143.498	242.332	251.016	196.073	166.102	165.331	199.737		177.527	246.674	181.087	182.534		178.693	246.674	189.959	186.502		CDC10	1.38043	0.0663755	0.0962445	1.06305	0.902355	0.559085	1.0437	0.866791	0.51819
CDR1		3178.56	3347.28	3967.5	2927.95	3140.02	3926.07	3748.89	3225.33	3184.38		3512.85	3447.27	3967.5	3225.96	3140.02	3926.07	3776.48	3225.33	3238.87		3642.54	3182.99	3851.28	3232.1		3666.47	3182.99	4039.96	3302.36		CDR1	0.868134	0.120536	0.138562	1.10187	0.409729	0.297522	0.900691	0.147279	0.12367
CDR2		1	1	1	1	1	1	1	1.33117	4.3767		27.1455	25.0022	1	1	1	1	1	1.33117	4.4516		17.7159	1	1	2.89139		17.8323	1	1	2.95424		CDR2	0.056078	0.220063	0.220711	0.056078	0.220063	0.182456	0.165668	0.266362	0.200684
CHT2		2718.56	2843.28	3098.5	1702.95	1872.02	1446.07	1386.89	1090.33	1048.38		3004.47	2928.21	3098.5	1876.28	1872.02	1446.07	1397.1	1090.33	1066.32		3010.39	1874.15	1421.58	1078.32		3030.17	1874.15	1491.23	1101.76		CHT2	0.618495	0.00038236	0.00487891	0.492128	0.000158139	0.00271981	0.363598	8.06032e-05	0.00184994
CHT3		772.562	939.277	650.498	840.946	926.016	876.073	934.888	1135.33	1237.38		853.813	967.335	650.498	926.539	926.016	876.073	941.769	1135.33	1258.55		823.882	926.277	908.921	1196.94		829.295	926.277	953.452	1222.96		CHT3	1.11695	0.455018	0.377015	1.14971	0.536334	0.377131	1.4747	0.0619501	0.0654701
CIT1		16859.6	17534.3	19110.5	18066.9	20023	22781.1	23179.9	20182.3	20301.4		18632.7	18058.1	19110.5	19905.8	20023	22781.1	23350.5	20182.3	20648.8		18600.4	19964.4	23065.8	20415.6		18722.6	19964.4	24195.9	20859.3		CIT1	1.06633	0.0408908	0.0681654	1.29233	0.00212696	0.00695017	1.11413	0.0242331	0.0355419
CPH1		304.562	319.277	409.498	298.946	333.016	264.073	239.888	272.331	259.377		336.593	328.815	409.498	329.373	333.016	264.073	241.654	272.331	263.816		358.302	331.194	252.863	268.073		360.656	331.194	265.252	273.901		CPH1	0.918311	0.474043	0.383766	0.735471	0.0540456	0.0652659	0.759451	0.0733182	0.0726577
CPH2		1358.56	1387.28	1337.5	1487.95	1679.02	1593.07	1528.89	1935.33	1899.38		1501.44	1428.72	1337.5	1639.39	1679.02	1593.07	1540.14	1935.33	1931.88		1422.55	1659.2	1566.61	1933.61		1431.9	1659.2	1643.36	1975.64		CPH2	1.15874	0.0329497	0.0583942	1.14768	0.111024	0.11218	1.37973	0.00360746	0.00967855
CRH11		1167.56	1266.28	1084.5	1784.95	1860.02	1393.07	1393.89	1471.33	1447.38		1290.35	1304.1	1084.5	1966.62	1860.02	1393.07	1404.15	1471.33	1472.15		1226.32	1913.32	1398.61	1471.74		1234.38	1913.32	1467.13	1503.73		CRH11	1.55003	0.00630246	0.0182771	1.18856	0.15713	0.144648	1.21821	0.0752623	0.0732642
CSA1		9499.56	9951.28	11636.5	8441.95	9219.02	9553.07	9307.89	8719.33	8999.38		10498.6	10248.5	11636.5	9301.19	9219.02	9553.07	9376.4	8719.33	9153.39		10794.6	9260.1	9464.74	8936.36		10865.5	9260.1	9928.44	9130.61		CSA1	0.85225	0.0690751	0.0988552	0.91376	0.0963336	0.102837	0.840332	0.0480818	0.0564544
CSH1		1233.56	1382.28	1399.5	1298.95	1393.02	1366.07	1286.89	1972.33	1861.38		1363.3	1423.57	1399.5	1431.16	1393.02	1366.07	1296.36	1972.33	1893.23		1395.45	1412.09	1331.22	1932.78		1404.62	1412.09	1396.44	1974.79		CSH1	1.00531	0.577618	0.444	0.994173	0.159035	0.144648	1.40593	0.000716674	0.00397152
DAK2		1037.56	1215.28	1145.5	1153.95	1303.02	1149.07	1102.89	1189.33	1223.38		1146.68	1251.58	1145.5	1271.4	1303.02	1149.07	1111.01	1189.33	1244.31		1181.25	1287.21	1130.04	1216.82		1189.01	1287.21	1185.4	1243.27		DAK2	1.08258	0.109024	0.132893	0.996963	0.36046	0.265213	1.04563	0.526702	0.342824
DDR48		10279.6	11521.3	8854.5	13517.9	14776	10956.1	10905.9	9166.33	9292.38		11360.7	11865.4	8854.5	14893.8	14776	10956.1	10986.2	9166.33	9451.4		10693.5	14834.9	10971.1	9308.87		10763.8	14834.9	11508.6	9511.22		DDR48	1.37822	0.0411343	0.0681654	1.0692	0.832215	0.525335	0.883631	0.334358	0.240388
DFG5		521.562	584.277	425.498	873.946	964.016	851.073	857.888	796.331	791.377		576.415	601.731	425.498	962.898	964.016	851.073	864.203	796.331	804.92		534.548	963.457	857.638	800.626		538.06	963.457	899.656	818.029		DFG5	1.79061	0.00910475	0.0223417	1.67204	0.0200267	0.030479	1.52033	0.0332835	0.0451998
ECE1		58600.6	62013.3	60486.5	45253.9	49803	31387.1	30673.9	34525.3	34152.4		64763.6	63865.8	60486.5	49860	49803	31387.1	30899.7	34525.3	34736.8		63038.6	49831.5	31143.4	34631.1		63452.8	49831.5	32669.2	35383.9		ECE1	0.785332	0.00429636	0.0140568	0.514858	0.000325235	0.00271981	0.557641	0.000452751	0.00313045
ECM331		1054.56	1166.28	822.498	1317.95	1475.02	624.073	641.888	896.331	932.377		1165.47	1201.12	822.498	1452.09	1475.02	624.073	646.613	896.331	948.333		1063.03	1463.55	635.343	922.332		1070.01	1463.55	666.47	942.381		ECM331	1.36779	0.08275	0.111146	0.622862	0.0713023	0.0813103	0.88072	0.436285	0.29263
EFG1		1646.56	1753.28	2407.5	1411.95	1489.02	2430.07	2406.89	1545.33	1570.38		1819.73	1805.65	2407.5	1555.66	1489.02	2430.07	2424.6	1545.33	1597.25		2010.96	1522.34	2427.34	1571.29		2024.17	1522.34	2546.26	1605.45		EFG1	0.752078	0.153687	0.16761	1.25793	0.202358	0.177023	0.793137	0.185333	0.151012
ELF1		1057.56	1059.28	1230.5	484.946	543.016	528.073	534.888	547.331	553.377		1168.79	1090.92	1230.5	534.305	543.016	528.073	538.825	547.331	562.847		1163.4	538.66	533.449	555.089		1171.04	538.66	559.584	567.155		ELF1	0.459982	0.00125724	0.0065923	0.47785	0.00123046	0.00461862	0.484315	0.0013769	0.00534257
ENA2		2798.56	2755.28	3196.5	3237.95	3643.02	4013.07	3823.89	3709.33	3692.38		3092.89	2837.58	3196.5	3567.51	3643.02	4013.07	3852.03	3709.33	3755.57		3042.32	3605.26	3932.55	3732.45		3062.31	3605.26	4125.22	3813.58		ENA2	1.1773	0.0279016	0.0523565	1.34709	0.00959691	0.0187055	1.24533	0.0156174	0.0272685
ENA21		6191.56	6624.28	6962.5	6847.95	7398.02	8308.07	8786.89	7677.33	7852.38		6842.73	6822.16	6962.5	7544.95	7398.02	8308.07	8851.56	7677.33	7986.76		6875.8	7471.48	8579.82	7832.04		6920.97	7471.48	9000.17	8002.29		ENA21	1.07954	0.00477833	0.014517	1.30042	0.00392743	0.0109113	1.15624	0.00501241	0.0117312
FAV2		176.562	193.277	182.498	139.946	127.016	66.0726	62.8882	87.3312	80.3767		195.131	199.051	182.498	154.19	127.016	66.0726	63.351	87.3312	81.7522		192.226	140.603	64.7118	84.5417		193.489	140.603	67.8823	86.3794		FAV2	0.726668	0.0231397	0.0461348	0.350832	0.000292978	0.00271981	0.44643	0.000541378	0.00350303
FBP1		6480.56	7211.28	9464.5	8741.95	10013	9044.07	9146.89	10477.3	10102.4		7162.12	7426.69	9464.5	9631.72	10013	9044.07	9214.21	10477.3	10275.3		8017.77	9822.37	9129.14	10376.3		8070.45	9822.37	9576.41	10601.9		FBP1	1.21708	0.153616	0.16761	1.1866	0.322766	0.245612	1.31366	0.0874308	0.0829085
FDH1		3535.56	3828.28	3677.5	1644.95	1781.02	1658.07	1579.89	1328.33	1332.38		3907.4	3942.64	3677.5	1812.37	1781.02	1658.07	1591.52	1328.33	1355.18		3842.51	1796.69	1624.79	1341.75		3867.76	1796.69	1704.4	1370.92		FDH1	0.464531	0.000320832	0.00487891	0.440669	0.000267839	0.00271981	0.354449	0.000175413	0.00275649
FGR15		177.562	225.277	209.498	192.946	200.016	210.073	205.888	175.331	201.377		196.236	232.007	209.498	212.584	200.016	210.073	207.404	175.331	204.823		212.58	206.3	208.738	190.077		213.977	206.3	218.965	194.209		FGR15	0.964122	0.689619	0.508644	1.02331	0.794686	0.507412	0.907616	0.286307	0.211367
FKH2		149.562	165.277	174.498	141.946	216.016	194.073	194.888	233.331	241.377		165.292	170.214	174.498	156.393	216.016	194.073	196.323	233.331	245.507		170.001	186.204	195.198	239.419		171.118	186.204	204.761	244.624		FKH2	1.08816	0.523195	0.409986	1.19661	0.00568186	0.0131511	1.42956	0.00118601	0.0048319
FRP1		3956.56	4152.28	5663.5	4174.95	4464.02	4608.07	4521.89	4389.33	4294.38		4372.67	4276.31	5663.5	4599.88	4464.02	4608.07	4555.17	4389.33	4367.87		4770.83	4531.95	4581.62	4378.6		4802.17	4531.95	4806.09	4473.78		FRP1	0.943729	0.707889	0.516152	1.00082	0.764789	0.494	0.931615	0.545655	0.351006
FRP2		7071.56	7331.28	7562.5	7292.95	8032.02	9206.07	9208.89	8076.33	8021.38		7815.28	7550.28	7562.5	8035.24	8032.02	9206.07	9276.67	8076.33	8158.65		7642.68	8033.63	9241.37	8117.49		7692.9	8033.63	9694.14	8293.94		FRP2	1.04429	0.0393117	0.0677862	1.26014	0.0007968	0.00384889	1.07813	0.0261542	0.0372543
FRP3		6535.56	7452.28	8470.5	7180.95	7871.02	9025.07	8803.89	9305.33	9490.38		7222.91	7674.89	8470.5	7911.84	7871.02	9025.07	8868.69	9305.33	9652.79		7789.43	7891.43	8946.88	9479.06		7840.61	7891.43	9385.22	9685.11		FRP3	1.00648	0.84246	0.593911	1.197	0.0925092	0.10176	1.23525	0.0406282	0.0511729
FTR1		5267.56	5503.28	7165.5	3108.95	3380.02	3663.07	3538.89	2820.33	2681.38		5821.55	5667.67	7165.5	3425.38	3380.02	3663.07	3564.94	2820.33	2727.26		6218.24	3402.7	3614	2773.8		6259.1	3402.7	3791.07	2834.09		FTR1	0.543641	0.0195084	0.0406682	0.605689	0.0241265	0.0343648	0.452796	0.0112522	0.0211208
GAL1		1927.56	2074.28	1791.5	2158.95	2399.02	1813.07	1794.89	2442.33	2289.38		2130.28	2136.24	1791.5	2378.69	2399.02	1813.07	1808.1	2442.33	2328.56		2019.34	2388.85	1810.59	2385.44		2032.61	2388.85	1899.29	2437.3		GAL1	1.17526	0.0870262	0.113312	0.934412	0.250918	0.202007	1.1991	0.0966017	0.0885516
GAL4		1035.56	1124.28	1141.5	1376.95	1609.02	1345.07	1310.89	1573.33	1444.38		1144.47	1157.86	1141.5	1517.09	1609.02	1345.07	1320.54	1573.33	1469.1		1147.94	1563.06	1332.8	1521.21		1155.49	1563.06	1398.1	1554.28		GAL4	1.35273	0.00127444	0.0065923	1.20997	0.000486251	0.00284329	1.34513	0.00249055	0.00782743
GAP2		1760.56	2072.28	1936.5	2766.95	3006.02	4059.07	4168.89	2765.33	2967.38		1945.72	2134.18	1936.5	3048.57	3006.02	4059.07	4199.57	2765.33	3018.16		2005.47	3027.29	4129.32	2891.75		2018.64	3027.29	4331.63	2954.6		GAP2	1.49967	0.00122367	0.0065923	2.14581	0.000216768	0.00271981	1.46366	0.00585975	0.0128915
GCA2		443.562	461.277	299.498	264.946	304.016	320.073	268.888	330.331	332.377		490.212	475.056	299.498	291.912	304.016	320.073	270.867	330.331	338.065		421.589	297.964	295.47	334.198		424.358	297.964	309.946	341.463		GCA2	0.702152	0.216196	0.220693	0.730387	0.217817	0.181951	0.804656	0.349706	0.245017
GCN4		1726.56	1743.28	1281.5	2789.95	2791.02	3522.07	3606.89	2439.33	2462.38		1908.14	1795.35	1281.5	3073.91	2791.02	3522.07	3633.44	2439.33	2504.52		1661.66	2932.46	3577.75	2471.92		1672.58	2932.46	3753.04	2525.66		GCN4	1.75326	0.0182192	0.039403	2.24386	0.00474285	0.0122542	1.51003	0.0478856	0.0564544
GIS2		2792.56	2882.28	3020.5	2686.95	2831.02	2761.07	2796.89	3130.33	3062.38		3086.26	2968.38	3020.5	2960.43	2831.02	2761.07	2817.47	3130.33	3114.78		3025.04	2895.72	2789.27	3122.56		3044.92	2895.72	2925.93	3190.43		GIS2	0.951002	0.142019	0.15758	0.960922	0.0168952	0.0268152	1.04779	0.115619	0.103399
GNP1		6656.56	7244.28	9139.5	7650.95	8332.02	7526.07	7817.89	8755.33	8922.38		7356.63	7460.68	9139.5	8429.68	8332.02	7526.07	7875.43	8755.33	9075.07		7985.6	8380.85	7700.75	8915.2		8038.07	8380.85	8078.04	9108.99		GNP1	1.04264	0.633263	0.47254	1.00497	0.731778	0.478239	1.13323	0.306109	0.22448
GPD2		7142.56	7414.28	9552.5	2273.95	2361.02	2007.07	2140.89	2249.33	2230.38		7893.75	7635.76	9552.5	2505.39	2361.02	2007.07	2156.65	2249.33	2268.55		8360.67	2433.2	2081.86	2258.94		8415.6	2433.2	2183.86	2308.04		GPD2	0.28913	0.00467921	0.014517	0.259501	0.00396427	0.0109113	0.274258	0.00427469	0.0109353
HAC1		1576.56	1683.28	1706.5	1625.95	1875.02	1593.07	1624.89	1709.33	1680.38		1742.37	1733.56	1706.5	1791.44	1875.02	1593.07	1636.85	1709.33	1709.13		1727.48	1833.23	1614.96	1709.23		1738.83	1833.23	1694.08	1746.39		HAC1	1.05429	0.0533275	0.0791231	0.974268	0.0134983	0.0238041	1.00435	0.281691	0.209523
HAP2		1074.56	1095.28	1277.5	1409.95	1556.02	1491.07	1466.89	1407.33	1374.38		1187.57	1128	1277.5	1553.45	1556.02	1491.07	1477.69	1407.33	1397.9		1197.69	1554.73	1484.38	1402.61		1205.56	1554.73	1557.1	1433.1		HAP2	1.28964	0.00785232	0.0205499	1.2916	0.014653	0.0250453	1.18875	0.0355951	0.0471742
HAP3		185.562	138.277	231.498	117.946	148.016	175.073	175.888	93.3312	99.3767		205.078	142.408	231.498	129.95	148.016	175.073	177.183	93.3312	101.077		192.994	138.983	176.128	97.2043		194.262	138.983	184.757	99.3172		HAP3	0.71544	0.21809	0.220711	0.951068	0.654956	0.441592	0.511253	0.0679309	0.0685542
HAP43		1193.56	1317.28	1444.5	1185.95	1359.02	1285.07	1259.89	1095.33	1201.38		1319.09	1356.63	1444.5	1306.65	1359.02	1285.07	1269.16	1095.33	1221.94		1373.4	1332.83	1277.12	1158.63		1382.43	1332.83	1339.69	1183.82		HAP43	0.964126	0.49059	0.391246	0.969083	0.140429	0.133961	0.856333	0.0496446	0.0574832
HEM1		391.562	385.277	377.498	280.946	305.016	334.073	292.888	282.331	284.377		432.743	396.786	377.498	309.541	305.016	334.073	295.044	282.331	289.243		402.342	307.278	314.558	285.787		404.986	307.278	329.97	292		HEM1	0.758739	0.0200791	0.0406682	0.814768	0.0410072	0.0523667	0.721012	0.0116212	0.0213055
HGT7		4365.56	4558.28	3357.5	484.946	544.016	582.073	542.888	804.331	720.377		4824.69	4694.44	3357.5	534.305	544.016	582.073	546.884	804.331	732.705		4292.21	539.16	564.478	768.518		4320.41	539.16	592.134	785.224		HGT7	0.124794	0.00845307	0.0215722	0.137055	0.00862151	0.0177438	0.181747	0.010122	0.0196568
HOG1		1086.56	1278.28	1244.5	1143.95	1273.02	1152.07	1207.89	1262.33	1249.38		1200.84	1316.46	1244.5	1260.38	1273.02	1152.07	1216.78	1262.33	1270.76		1253.93	1266.7	1184.43	1266.54		1262.17	1266.7	1242.45	1294.08		HOG1	1.00359	0.789572	0.562846	0.984379	0.256816	0.205268	1.02528	0.791356	0.483606
HSP104		1900.56	2106.28	2849.5	3011.95	3363.02	4674.07	4646.89	6584.33	6365.38		2100.44	2169.2	2849.5	3318.51	3363.02	4674.07	4681.09	6584.33	6474.31		2373.05	3340.76	4677.58	6529.32		2388.64	3340.76	4906.75	6671.25		HSP104	1.39861	0.0520183	0.078708	2.05421	0.00497347	0.012558	2.79291	0.000908445	0.00437728
HSP70		6626.56	7344.28	10138.5	10238.9	11836	13168.1	13142.9	15892.3	14673.4		7323.48	7563.67	10138.5	11281.1	11836	13168.1	13239.6	15892.3	14924.5		8341.88	11558.6	13203.8	15408.4		8396.69	11558.6	13850.8	15743.3		HSP70	1.37656	0.0723809	0.100389	1.64955	0.0249632	0.0347703	1.87495	0.0101858	0.0196568
HTA1		8586.56	9399.28	7443.5	8018.95	8965.02	7046.07	6911.89	7894.33	7622.38		9489.61	9680.05	7443.5	8835.14	8965.02	7046.07	6962.76	7894.33	7752.82		8871.05	8900.08	7004.42	7823.58		8929.34	8900.08	7347.59	7993.64		HTA1	0.996723	0.976954	0.663081	0.822859	0.136846	0.133365	0.895211	0.340106	0.241705
HTA2		4982.56	5487.28	4353.5	4241.95	4459.02	3588.07	3522.89	4025.33	3975.38		5506.58	5651.19	4353.5	4673.7	4459.02	3588.07	3548.82	4025.33	4043.41		5170.42	4566.36	3568.45	4034.37		5204.39	4566.36	3743.28	4122.07		HTA2	0.877405	0.341808	0.30941	0.719253	0.0567119	0.0677494	0.792036	0.121504	0.106923
HWP1		37835.6	38984.3	31967.5	37439.9	42037	25260.1	24459.9	26849.3	26159.4		41814.7	40148.8	31967.5	41250.7	42037	25260.1	24639.9	26849.3	26607.1		37977	41643.9	24950	26728.2		38226.5	41643.9	26172.4	27309.2		HWP1	1.0894	0.420614	0.357802	0.684665	0.0453817	0.0572944	0.714404	0.0644376	0.0664003
HYR1		1312.56	1430.28	1637.5	890.946	969.016	203.073	225.888	231.331	238.377		1450.6	1473	1637.5	981.628	969.016	203.073	227.551	231.331	242.456		1520.37	975.322	215.312	236.894		1530.36	975.322	225.861	242.043		HYR1	0.637317	0.00562955	0.0167054	0.147587	0.000440653	0.00271981	0.158161	0.000455338	0.00313045
IFD6		238.562	270.277	188.498	35.9455	37.0156	28.0726	7.88816	94.3312	66.3767		263.652	278.351	188.498	39.6042	37.0156	28.0726	7.94622	94.3312	67.5126		243.5	38.3099	18.0094	80.9219		245.1	38.3099	18.8917	82.6809		IFD6	0.156303	0.010657	0.0247242	0.0770777	0.00867167	0.0177438	0.337336	0.0223009	0.03315
IHD1		9368.56	10248.3	11705.5	10115.9	11502	7713.07	7623.89	9301.33	8768.38		10353.9	10554.4	11705.5	11145.6	11502	7713.07	7680	9301.33	8918.43		10871.3	11323.8	7696.54	9109.88		10942.7	11323.8	8073.62	9307.91		IHD1	1.03483	0.477921	0.383766	0.73781	0.010014	0.0188569	0.850606	0.0519173	0.0588752
INO4		296.562	299.277	292.498	432.946	458.016	468.073	472.888	436.331	467.377		327.752	308.217	292.498	477.012	458.016	468.073	476.369	436.331	475.375		309.489	467.514	472.221	455.853		311.522	467.514	495.356	465.762		INO4	1.50074	0.00180775	0.00823819	1.59012	0.00123455	0.00461862	1.49512	0.0049886	0.0117312
IRE1		244.562	286.277	192.498	312.946	356.016	351.073	367.888	395.331	352.377		270.283	294.829	192.498	344.798	356.016	351.073	370.596	395.331	358.407		252.536	350.407	360.834	376.869		254.196	350.407	378.513	385.061		IRE1	1.37849	0.0921386	0.117653	1.48906	0.0753433	0.0837064	1.51482	0.0599701	0.0646736
IRO1		746.562	802.277	994.498	1775.95	2117.02	1459.07	1495.89	868.331	866.377		825.078	826.243	994.498	1956.71	2117.02	1459.07	1506.9	868.331	881.203		881.94	2036.86	1482.99	874.767		887.734	2036.86	1555.64	893.782		IRO1	2.29445	0.00116368	0.0065923	1.75237	0.00402666	0.0109113	1.00681	0.927749	0.548669
KIP4		998.562	973.277	1143.5	763.946	921.016	637.073	594.888	662.331	654.377		1103.58	1002.35	1143.5	841.702	921.016	637.073	599.267	662.331	665.575		1083.14	881.359	618.17	663.953		1090.26	881.359	648.456	678.386		KIP4	0.808393	0.0468814	0.0747759	0.594772	0.00366637	0.0109113	0.622224	0.00450539	0.0112635
KRE1		1103.56	1153.28	1033.5	651.946	613.016	609.073	606.888	504.331	428.377		1219.62	1187.73	1033.5	718.302	613.016	609.073	611.355	504.331	435.708		1146.95	665.659	610.214	470.019		1154.49	665.659	640.11	480.236		KRE1	0.576585	0.0105285	0.0247242	0.554455	0.00544803	0.0128782	0.415974	0.00327659	0.00924166
MAC1		120.562	123.277	108.498	126.946	160.016	115.073	123.888	115.331	121.377		133.242	126.96	108.498	139.866	160.016	115.073	124.8	115.331	123.454		122.9	149.941	119.936	119.393		123.707	149.941	125.812	121.988		MAC1	1.21206	0.112982	0.134631	1.01702	0.791314	0.507412	0.986102	0.750251	0.463638
MAE1		612.562	678.277	794.498	729.946	741.016	601.073	650.888	895.331	841.377		676.985	698.539	794.498	804.241	741.016	601.073	655.679	895.331	855.776		723.341	772.628	628.376	875.553		728.093	772.628	659.162	894.586		MAE1	1.06117	0.415067	0.355453	0.905327	0.15879	0.144648	1.22867	0.0527779	0.0592405
MBF1		3789.56	4302.28	4435.5	3457.95	3740.02	3908.07	3811.89	3478.33	3645.38		4188.11	4430.8	4435.5	3809.9	3740.02	3908.07	3839.95	3478.33	3707.76		4351.47	3774.96	3874.01	3593.05		4380.06	3774.96	4063.81	3671.15		MBF1	0.861852	0.0130618	0.0297623	0.927798	0.0217424	0.0322077	0.838151	0.0113284	0.0211208
MDM34		2819.56	3280.28	3006.5	3993.95	4330.02	4357.07	4345.89	4719.33	4493.38		3116.1	3378.27	3006.5	4400.46	4330.02	4357.07	4377.88	4719.33	4570.27		3166.95	4365.24	4367.47	4644.8		3187.76	4365.24	4581.45	4745.77		MDM34	1.36937	0.00369492	0.0134706	1.4372	0.00351612	0.0109113	1.48875	0.00234858	0.00760283
MET28		1122.56	1142.28	1064.5	1786.95	1987.02	2155.07	2181.89	2069.33	1968.38		1240.62	1176.4	1064.5	1968.83	1987.02	2155.07	2197.95	2069.33	2002.06		1160.51	1977.92	2176.51	2035.7		1168.13	1977.92	2283.14	2079.95		MET28	1.69324	0.00117419	0.0065923	1.95453	0.00066005	0.00349198	1.78058	0.00115047	0.0048319
NDT80		1060.56	1138.28	1262.5	1098.95	1303.02	1110.07	1150.89	1148.33	1147.38		1172.1	1172.28	1262.5	1210.8	1303.02	1110.07	1159.36	1148.33	1167.01		1202.29	1256.91	1134.72	1157.67		1210.19	1256.91	1190.31	1182.84		NDT80	1.0386	0.369763	0.327651	0.983571	0.213963	0.181739	0.977395	0.340585	0.241705
NPR1		285.562	327.277	299.498	287.946	309.016	358.073	343.888	360.331	367.377		315.595	337.054	299.498	317.253	309.016	358.073	346.419	360.331	373.664		317.382	313.135	352.246	366.997		319.467	313.135	369.504	374.975		NPR1	0.980177	0.786908	0.562846	1.15662	0.0983516	0.103084	1.17375	0.0446989	0.0549084
NRG1		1273.56	1326.28	1184.5	1695.95	1910.02	1799.07	1848.89	2238.33	2136.38		1407.5	1365.9	1184.5	1868.56	1910.02	1799.07	1862.5	2238.33	2172.94		1319.3	1889.29	1830.78	2205.63		1327.97	1889.29	1920.48	2253.58		NRG1	1.42269	0.00789141	0.0205499	1.44618	0.0113034	0.020587	1.69701	0.00234996	0.00760283
PCK1		21033.6	23655.3	24151.5	34004.9	37319	33394.1	33388.9	37368.3	36671.4		23245.7	24361.9	24151.5	37466.1	37319	33394.1	33634.6	37368.3	37299		23919.7	37392.5	33514.4	37333.6		24076.8	37392.5	35156.3	38145.2		PCK1	1.55305	7.94081e-05	0.00400052	1.46017	0.000227372	0.00271981	1.58431	7.9044e-05	0.00184994
PES1		125.562	131.277	176.498	87.9455	83.0156	68.0726	100.888	115.331	88.3767		138.768	135.199	176.498	96.8969	83.0156	68.0726	101.631	115.331	89.8891		150.155	89.9562	84.8517	102.61		151.141	89.9562	89.0088	104.841		PES1	0.59518	0.0431721	0.0706251	0.588912	0.0538147	0.0652659	0.693661	0.0928016	0.0872494
PFK2		1211.56	1310.28	1171.5	924.946	986.016	905.073	919.888	1087.33	1076.38		1338.98	1349.42	1171.5	1019.09	986.016	905.073	926.659	1087.33	1094.8		1286.63	1002.55	915.866	1091.06		1295.09	1002.55	960.737	1114.78		PFK2	0.77412	0.0327574	0.0583942	0.741833	0.0157944	0.0258053	0.860778	0.0785928	0.0751757
PGA13		333.562	347.277	343.498	224.946	238.016	191.073	182.888	139.331	148.377		368.643	357.651	343.498	247.841	238.016	191.073	184.234	139.331	150.916		356.597	242.928	187.653	145.124		358.94	242.928	196.847	148.278		PGA13	0.676794	0.00149724	0.00707584	0.548412	0.000416988	0.00271981	0.4131	0.000255606	0.00278093
PGA17		297.562	293.277	343.498	413.946	443.016	479.073	513.888	608.331	612.377		328.857	302.038	343.498	456.078	443.016	479.073	517.671	608.331	622.857		324.797	449.547	498.372	615.594		326.931	449.547	522.788	628.975		PGA17	1.37505	0.00472387	0.014517	1.59908	0.00385013	0.0109113	1.92388	0.000404038	0.00313045
PGA25		181.562	175.277	200.498	331.946	402.016	382.073	331.888	494.331	544.377		200.657	180.513	200.498	365.732	402.016	382.073	334.331	494.331	553.693		193.889	383.874	358.202	524.012		195.163	383.874	375.751	535.403		PGA25	1.96694	0.00129479	0.0065923	1.92532	0.00365362	0.0109113	2.74336	0.000805936	0.00422157
PGA34		949.562	968.277	944.498	1063.95	1179.02	674.073	738.888	878.331	920.377		1049.43	997.202	944.498	1172.24	1179.02	674.073	744.327	878.331	936.128		997.042	1175.63	709.2	907.229		1003.59	1175.63	743.946	926.95		PGA34	1.17142	0.019805	0.0406682	0.741282	0.00878408	0.0177438	0.923631	0.137755	0.118383
PGA37		310.562	328.277	394.498	41.9455	55.0156	57.0726	56.8882	71.3312	57.3767		343.224	338.083	394.498	46.2149	55.0156	57.0726	57.3069	71.3312	58.3586		358.602	50.6152	57.1897	64.8449		360.958	50.6152	59.9916	66.2545		PGA37	0.140225	0.000957095	0.0065923	0.166201	0.000990897	0.00442205	0.183552	0.00113819	0.0048319
PGA48		1869.56	1877.28	1563.5	2327.95	2502.02	2156.07	2025.89	3415.33	3174.38		2066.18	1933.36	1563.5	2564.89	2502.02	2156.07	2040.8	3415.33	3228.7		1854.35	2533.45	2098.44	3322.02		1866.53	2533.45	2201.25	3394.23		PGA48	1.35731	0.0402732	0.0681654	1.17933	0.307174	0.235359	1.81847	0.00571035	0.0128191
PGA53		1436.56	1489.28	1831.5	1383.95	1611.02	1384.07	1340.89	1227.33	1234.38		1587.65	1533.77	1831.5	1524.81	1611.02	1384.07	1350.76	1227.33	1255.5		1650.97	1567.91	1367.42	1241.42		1661.82	1567.91	1434.41	1268.4		PGA53	0.943492	0.546475	0.425184	0.863158	0.0971911	0.102837	0.763262	0.0409383	0.0511729
PGA7		6483.56	6927.28	8266.5	6361.95	6936.02	7016.07	6880.89	6893.33	6902.38		7165.44	7134.21	8266.5	7009.48	6936.02	7016.07	6931.53	6893.33	7020.5		7522.05	6972.75	6973.8	6956.92		7571.47	6972.75	7315.47	7108.14		PGA7	0.920924	0.336738	0.30912	0.966189	0.337736	0.25353	0.938806	0.326488	0.237839
PHO89		4094.56	4448.28	2810.5	4921.95	5161.02	6709.07	6745.89	6178.33	6503.38		4525.19	4581.16	2810.5	5422.91	5161.02	6709.07	6795.54	6178.33	6614.67		3972.28	5291.97	6752.31	6396.5		3998.38	5291.97	7083.13	6535.54		PHO89	1.32353	0.179443	0.18923	1.7715	0.0342255	0.0451395	1.63455	0.0509489	0.0583789
PHR1		4722.56	4863.28	7594.5	6947.95	7603.02	6328.07	6286.89	6893.33	6675.38		5219.23	5008.55	7594.5	7655.13	7603.02	6328.07	6333.16	6893.33	6789.62		5940.76	7629.07	6330.62	6841.47		5979.79	7629.07	6640.78	6990.19		PHR1	1.27581	0.212879	0.21906	1.11054	0.739847	0.480684	1.16897	0.462118	0.306223
PHR2		278.562	264.277	238.498	300.946	312.016	265.073	300.888	303.331	269.377		307.859	272.172	238.498	331.577	312.016	265.073	303.103	303.331	273.987		272.843	321.796	284.088	288.659		274.635	321.796	298.006	294.934		PHR2	1.17172	0.165911	0.177902	1.0851	0.72831	0.478239	1.07391	0.612502	0.387214
PIL1		12218.6	13150.3	13320.5	9131.95	9480.02	9780.07	9421.89	9678.33	9742.38		13503.6	13543.1	13320.5	10061.4	9480.02	9780.07	9491.24	9678.33	9909.1		13455.7	9770.72	9635.65	9793.72		13544.1	9770.72	10107.7	10006.6		PIL1	0.721398	0.000557033	0.00646158	0.746281	0.000106581	0.00254119	0.738815	8.40882e-05	0.00184994
PIR1		2567.56	2465.28	2986.5	2393.95	2649.02	2401.07	2377.89	2422.33	2370.38		2837.59	2538.92	2986.5	2637.61	2649.02	2401.07	2395.39	2422.33	2410.94		2787.67	2643.31	2398.23	2416.64		2805.99	2643.31	2515.73	2469.17		PIR1	0.942026	0.458034	0.377065	0.896558	0.105745	0.108781	0.879965	0.116983	0.103776
PLB5		467.562	517.277	529.498	719.946	860.016	515.073	512.888	613.331	640.377		516.736	532.729	529.498	793.224	860.016	515.073	516.663	613.331	651.336		526.321	826.62	515.868	632.333		529.779	826.62	541.142	646.079		PLB5	1.56031	0.00134326	0.0065923	1.02145	0.197295	0.173964	1.21953	0.00639974	0.0138034
POL1		154.562	184.277	184.498	169.946	214.016	148.073	149.888	175.331	190.377		170.818	189.782	184.498	187.243	214.016	148.073	150.991	175.331	193.635		181.699	200.629	149.532	184.483		182.893	200.629	156.858	188.493		POL1	1.09698	0.223133	0.220711	0.85765	0.0222823	0.0325732	1.03062	0.798544	0.485303
PRA1		57.5622	48.277	43.4975	1	1	14.0726	9.88816	23.3312	36.3767		63.6161	49.7192	43.4975	1.10178	1	14.0726	9.96094	23.3312	36.9992		52.2776	1.05089	12.0168	30.1652		52.6211	1.05089	12.6055	30.8209		PRA1	0.0199709	0.00686435	0.0190411	0.239552	0.0142478	0.0247333	0.585714	0.0958762	0.0885516
RBR1		36.5622	49.277	53.4975	74.9455	83.0156	16.0726	12.8882	73.3312	82.3767		40.4075	50.749	53.4975	82.5737	83.0156	16.0726	12.983	73.3312	83.7865		48.218	82.7947	14.5278	78.5588		48.5348	82.7947	15.2396	80.2665		RBR1	1.70588	0.00673376	0.0190411	0.313992	0.00775986	0.0169043	1.65379	0.0182071	0.0294526
RBR2		677.562	737.277	712.498	1026.95	1251.02	1410.07	1481.89	1178.33	1280.38		748.821	759.301	712.498	1131.47	1251.02	1410.07	1492.8	1178.33	1302.29		740.207	1191.24	1451.43	1240.31		745.07	1191.24	1522.54	1267.27		RBR2	1.59883	0.00257944	0.0106173	2.04349	0.000279991	0.00271981	1.70087	0.00208889	0.00741219
RBT1		348.562	395.277	358.498	486.946	542.016	420.073	426.888	477.331	492.377		385.221	407.085	358.498	536.508	542.016	420.073	430.03	477.331	500.803		383.601	539.262	425.051	489.067		386.121	539.262	445.876	499.698		RBT1	1.39661	0.0033874	0.0127292	1.15476	0.111069	0.11218	1.29415	0.0135472	0.0244294
RBT5		56791.6	59683.3	63232.5	73021.9	80010	75565.1	75849.9	73068.3	72354.4		62764.3	61466.2	63232.5	80454.3	80010	75565.1	76408.2	73068.3	73592.6		62487.7	80232.2	75986.6	73330.5		62898.2	80232.2	79709.5	74924.5		RBT5	1.27559	0.000135717	0.00400052	1.26728	0.000375502	0.00271981	1.1912	0.000608502	0.00371862
RCT1		8896.56	9828.28	13581.5	13413.9	14203	11475.1	11146.9	11054.3	10538.4		9832.21	10121.9	13581.5	14779.3	14203	11475.1	11228.9	11054.3	10718.7		11178.5	14491.1	11352	10886.5		11252	14491.1	11908.2	11123.2		RCT1	1.28788	0.125314	0.142768	1.05832	0.918351	0.560598	0.988553	0.863454	0.51819
RFG1		857.562	863.277	639.498	795.946	925.016	913.073	905.888	887.331	852.377		947.752	889.065	639.498	876.959	925.016	913.073	912.556	887.331	866.964		825.438	900.987	912.814	877.148		830.862	900.987	957.536	896.214		RFG1	1.0844	0.583401	0.44576	1.15246	0.525589	0.37193	1.07866	0.700769	0.435506
RFX2		305.562	309.277	393.498	261.946	291.016	273.073	249.888	211.331	246.377		337.698	318.516	393.498	288.607	291.016	273.073	251.727	211.331	250.593		349.904	289.811	262.4	230.962		352.203	289.811	275.256	235.983		RFX2	0.822854	0.130395	0.147242	0.781527	0.0621597	0.0726942	0.670019	0.0352851	0.0471742
RHR2		11146.6	11343.3	12908.5	3578.95	3718.02	3344.07	3617.89	3479.33	3413.38		12318.8	11682.1	12908.5	3943.22	3718.02	3344.07	3644.52	3479.33	3471.79		12303.2	3830.62	3494.29	3475.56		12384	3830.62	3665.49	3551.11		RHR2	0.30932	0.000360186	0.00487891	0.295986	0.00033297	0.00271981	0.28675	0.000303374	0.00278093
RIM101		3049.56	3355.28	4197.5	3830.95	3841.02	3618.07	3697.89	3731.33	4049.38		3370.28	3455.51	4197.5	4220.87	3841.02	3618.07	3725.11	3731.33	4118.68		3674.43	4030.94	3671.59	3925		3698.57	4030.94	3851.47	4010.32		RIM101	1.08986	0.403539	0.350283	1.04134	0.993886	0.587344	1.08429	0.545363	0.351006
RNR22		291.562	339.277	379.498	325.946	392.016	339.073	327.888	440.331	450.377		322.226	349.412	379.498	359.121	392.016	339.073	330.302	440.331	458.084		350.378	375.568	334.687	449.208		352.681	375.568	351.085	458.972		RNR22	1.0649	0.381572	0.333483	0.995475	0.520142	0.370435	1.30138	0.0214877	0.0323787
ROB1		1474.56	1666.28	1506.5	1653.95	1900.02	1787.07	1754.89	1896.33	1981.38		1629.64	1716.05	1506.5	1822.29	1900.02	1787.07	1767.8	1896.33	2015.28		1617.4	1861.15	1777.44	1955.81		1628.02	1861.15	1864.52	1998.32		ROB1	1.1432	0.0618311	0.0906857	1.14527	0.135294	0.133019	1.22745	0.0330276	0.0451998
RPN4		815.562	827.277	916.498	862.946	964.016	939.073	930.888	836.331	803.377		901.335	851.99	916.498	950.778	964.016	939.073	937.74	836.331	817.125		889.941	957.397	938.406	826.728		895.788	957.397	984.382	844.699		RPN4	1.06878	0.0781267	0.106672	1.0989	0.149547	0.139619	0.942968	0.0943157	0.0879214
RTA3		1	1	1	1	1	0.0725599	10.8882	10.3312	13.3767		11.6731	3.37491	1	1	1	0.0725599	10.9683	10.3312	13.6056		5.34933	1	5.52043	11.9684		5.38447	1	5.7909	12.2286		RTA3	0.185719	0.374274	0.329361	1.07548	0.978412	0.582654	2.27108	0.225574	0.177236
SAP1		1	1	1	13.9455	36.0156	40.0726	16.8882	43.3312	34.3767		22.7248	33.2412	1	15.365	1	40.0726	17.0125	43.3312	34.965		18.9887	8.18248	28.5425	39.1481		19.1134	8.18248	29.9409	39.9991		SAP1	0.428101	0.478204	0.383766	1.56649	0.568679	0.39736	2.09272	0.209154	0.166717
SAP10		64.5622	92.277	81.4975	125.946	120.016	149.073	136.888	138.331	121.377		71.3522	95.0335	81.4975	138.765	120.016	149.073	137.896	138.331	123.454		82.6278	129.39	143.484	130.893		83.1707	129.39	150.514	133.738		SAP10	1.55572	0.0254976	0.0500538	1.8097	0.00838277	0.0177438	1.60799	0.0190932	0.0304385
SAP2		1	1	1	1	1	1	1	1	1		14.9886	7.4944	1	1	1	1	1	1	1		7.82766	1	1	1		7.87909	1	1	1		SAP2	0.126918	0.281904	0.26844	0.126918	0.281904	0.222124	0.126918	0.281904	0.209523
SAP4		101.562	81.277	58.4975	17.9455	22.0156	5.07256	1.88816	28.3312	24.3767		112.244	83.7049	58.4975	19.7721	22.0156	5.07256	1.90206	28.3312	24.7939		84.8153	20.8938	3.48731	26.5625		85.3726	20.8938	3.65817	27.1399		SAP4	0.244737	0.0498453	0.0775642	0.0428494	0.0270989	0.0367158	0.3179	0.0624942	0.0654701
SAP5		2194.56	2425.28	3218.5	2278.95	2584.02	1243.07	1177.89	1161.33	1080.38		2425.36	2497.73	3218.5	2510.9	2584.02	1243.07	1186.56	1161.33	1098.87		2713.86	2547.46	1214.82	1130.1		2731.69	2547.46	1274.33	1154.66		SAP5	0.932557	0.646858	0.479878	0.466499	0.0195779	0.0302098	0.422692	0.0168879	0.0281185
SAP6		549.562	532.277	653.498	576.946	661.016	111.073	121.888	225.331	245.377		607.36	548.177	653.498	635.669	661.016	111.073	122.785	225.331	249.576		603.012	648.342	116.929	237.454		606.973	648.342	122.658	242.615		SAP6	1.06816	0.344244	0.30941	0.202081	0.00116383	0.00461862	0.399713	0.00284565	0.00844966
SAP9		2881.56	3209.28	3181.5	3073.95	3414.02	3177.07	3108.89	2919.33	2999.38		3184.62	3305.15	3181.5	3386.82	3414.02	3177.07	3131.77	2919.33	3050.71		3223.75	3400.42	3154.42	2985.02		3244.93	3400.42	3308.97	3049.91		SAP9	1.04792	0.0457018	0.0738171	1.01973	0.298005	0.229919	0.939898	0.0449251	0.0549084
SCW11		820.562	965.277	659.498	950.946	1081.02	848.073	845.888	1130.33	1138.38		906.861	994.112	659.498	1047.74	1081.02	848.073	852.114	1130.33	1157.86		853.49	1064.38	850.093	1144.09		859.098	1064.38	891.742	1168.96		SCW11	1.23895	0.203131	0.212455	1.038	0.980704	0.582654	1.36069	0.111044	0.100122
SCW4		294.562	311.277	383.498	548.946	565.016	674.073	732.888	768.331	837.377		325.541	320.576	383.498	604.819	565.016	674.073	738.283	768.331	851.707		343.205	584.917	706.178	810.019		345.46	584.917	740.776	827.627		SCW4	1.69316	0.0039931	0.0140568	2.14432	0.00197631	0.00678057	2.39573	0.0014085	0.00534257
SEF1		1588.56	1649.28	1443.5	1744.95	1935.02	1632.07	1585.89	1500.33	1454.38		1755.63	1698.54	1443.5	1922.55	1935.02	1632.07	1597.56	1500.33	1479.27		1632.56	1928.78	1614.82	1489.8		1643.28	1928.78	1693.93	1522.18		SEF1	1.17374	0.0967781	0.119892	1.03082	0.895755	0.559085	0.926305	0.333464	0.240388
SEF2		415.562	443.277	496.498	178.946	173.016	254.073	240.888	218.331	195.377		459.267	456.519	496.498	197.159	173.016	254.073	242.661	218.331	198.72		470.761	185.087	248.367	208.526		473.854	185.087	260.535	213.059		SEF2	0.3906	0.000630752	0.0065923	0.549822	0.000995061	0.00442205	0.449629	0.000722094	0.00397152
SGA1		482.562	475.277	444.498	368.946	445.016	389.073	335.888	390.331	360.377		533.313	489.475	444.498	406.498	445.016	389.073	338.36	390.331	366.544		489.095	425.757	363.717	378.438		492.309	425.757	381.536	386.664		SGA1	0.864817	0.177431	0.188669	0.774994	0.046099	0.057546	0.785409	0.0482429	0.0564544
SIN3		869.562	912.277	1102.5	916.946	1103.02	1046.07	1006.89	1153.33	1103.38		961.014	939.529	1102.5	1010.27	1103.02	1046.07	1014.3	1153.33	1122.26		1001.01	1056.65	1030.19	1137.8		1007.59	1056.65	1080.66	1162.53		SIN3	1.04869	0.509408	0.40373	1.07252	0.692896	0.46374	1.15377	0.133864	0.115946
SIT1		2274.56	2329.28	2162.5	1108.95	1219.02	1526.07	1561.89	1162.33	1138.38		2513.78	2398.86	2162.5	1221.82	1219.02	1526.07	1573.38	1162.33	1157.86		2358.38	1220.42	1549.73	1160.09		2373.87	1220.42	1625.65	1185.31		SIT1	0.514104	0.00339179	0.0127292	0.684811	0.00924972	0.0183508	0.499316	0.00291897	0.00844966
SMC2		134.562	115.277	162.498	129.946	172.016	134.073	95.8882	140.331	148.377		148.714	118.721	162.498	143.172	172.016	134.073	96.5939	140.331	150.916		143.311	157.594	115.333	145.624		144.252	157.594	120.984	148.789		SMC2	1.09249	0.523729	0.409986	0.838696	0.288763	0.224347	1.03145	0.901227	0.535865
SOD4		348.562	382.277	236.498	303.946	322.016	405.073	421.888	215.331	206.377		385.221	393.696	236.498	334.882	322.016	405.073	424.993	215.331	209.909		338.472	328.449	415.033	212.62		340.695	328.449	435.367	217.242		SOD4	0.964054	0.889058	0.616543	1.27788	0.331917	0.250857	0.637642	0.152298	0.126915
SOD5		25247.6	26888.3	34605.5	21699.9	23193	24789.1	23770.9	16055.3	15618.4		27902.8	27691.5	34605.5	23908.6	23193	24789.1	23945.9	16055.3	15885.7		30066.6	23550.8	24367.5	15970.5		30264.2	23550.8	25561.3	16317.7		SOD5	0.778175	0.113678	0.134631	0.844607	0.148666	0.139619	0.539174	0.0171267	0.0281185
SOD6		553.562	630.277	831.498	945.946	1072.02	949.073	929.888	865.331	779.377		611.78	649.105	831.498	1042.23	1072.02	949.073	936.733	865.331	792.715		697.461	1057.12	942.903	829.023		702.043	1057.12	989.099	847.044		SOD6	1.50578	0.0267332	0.0516842	1.40889	0.0680223	0.0787217	1.20654	0.246917	0.189936
SOG2		234.562	243.277	262.498	313.946	289.016	256.073	276.888	310.331	291.377		259.231	250.544	262.498	345.9	289.016	256.073	278.926	310.331	296.363		257.424	317.458	267.499	303.347		259.116	317.458	280.605	309.941		SOG2	1.22516	0.0697254	0.0988552	1.08293	0.374562	0.273775	1.19615	0.00705738	0.0149291
SSB1		4952.56	5277.28	6185.5	4138.95	4205.02	4130.07	4073.89	4409.33	4477.38		5473.42	5434.92	6185.5	4560.22	4205.02	4130.07	4103.87	4409.33	4554		5697.95	4382.62	4116.97	4481.67		5735.38	4382.62	4318.68	4579.09		SSB1	0.764137	0.0309583	0.0572504	0.752988	0.0152588	0.0255009	0.798392	0.0318873	0.0444
STF2		26412.6	28402.3	33206.5	32335.9	36289	37343.1	37927.9	40463.3	37352.4		29190.4	29250.7	33206.5	35627.2	36289	37343.1	38207.1	40463.3	37991.6		30549.2	35958.1	37775.1	39227.5		30749.9	35958.1	39625.8	40080.2		STF2	1.16937	0.0524309	0.078708	1.28865	0.0255874	0.0350958	1.30342	0.0210255	0.0323787
STP2		2027.56	2065.28	2075.5	2681.95	3054.02	3098.07	3088.89	3402.33	3327.38		2240.8	2126.97	2075.5	2954.92	3054.02	3098.07	3111.62	3402.33	3384.32		2147.76	3004.47	3104.85	3393.33		2161.87	3004.47	3256.97	3467.09		STP2	1.38976	0.00133322	0.0065923	1.50655	0.000626649	0.00348104	1.60375	0.000288209	0.00278093
SUT1		266.562	310.277	218.498	244.946	256.016	205.073	181.888	344.331	287.377		294.597	319.546	218.498	269.877	256.016	205.073	183.227	344.331	292.295		277.547	262.946	194.15	318.313		279.37	262.946	203.662	325.232		SUT1	0.941211	0.736662	0.531063	0.729003	0.128842	0.127806	1.16416	0.420314	0.285398
TEC1		2010.56	1988.28	2016.5	1940.95	2147.02	1621.07	1571.89	1488.33	1438.38		2222.01	2047.67	2016.5	2138.5	2147.02	1621.07	1583.46	1488.33	1462.99		2095.39	2142.76	1602.27	1475.66		2109.16	2142.76	1680.77	1507.74		TEC1	1.01593	0.60659	0.460719	0.796888	0.00977194	0.0187183	0.714852	0.00499026	0.0117312
TPK1		653.562	746.277	570.498	580.946	558.016	584.073	585.888	574.331	621.377		722.297	768.57	570.498	640.076	558.016	584.073	590.201	574.331	632.011		687.122	599.046	587.137	603.171		691.636	599.046	615.902	616.282		TPK1	0.866128	0.366802	0.327301	0.890501	0.286258	0.223966	0.89105	0.371938	0.254119
TPK2		780.562	727.277	576.498	742.946	845.016	743.073	737.888	836.331	837.377		862.654	749.002	576.498	818.565	845.016	743.073	743.319	836.331	851.707		729.385	831.79	743.196	844.019		734.177	831.79	779.608	862.366		TPK2	1.13296	0.412388	0.355453	1.06188	0.905808	0.559085	1.1746	0.364637	0.250741
TPS2		4413.56	5005.28	5841.5	2830.95	3041.02	2918.07	2871.89	2638.33	2549.38		4877.74	5154.8	5841.5	3119.09	3041.02	2918.07	2893.03	2638.33	2593.01		5291.34	3080.05	2905.55	2615.67		5326.11	3080.05	3047.9	2672.53		TPS2	0.578293	0.00944528	0.02274	0.572257	0.00756171	0.0168021	0.501778	0.00546239	0.012518
TRR1		1218.56	1388.28	1838.5	975.946	1129.02	1022.07	1119.89	1005.33	970.377		1346.72	1429.75	1838.5	1075.28	1129.02	1022.07	1128.13	1005.33	986.983		1538.32	1102.15	1075.1	996.157		1548.43	1102.15	1127.77	1017.81		TRR1	0.711785	0.113951	0.134631	0.728335	0.103627	0.107598	0.657319	0.0700707	0.0700707
TRX1		3047.56	3073.28	2559.5	2144.95	2342.02	2315.07	2211.89	2325.33	2434.38		3368.07	3165.08	2559.5	2363.26	2342.02	2315.07	2228.17	2325.33	2476.04		3030.88	2352.64	2271.62	2400.68		3050.8	2352.64	2382.92	2452.87		TRX1	0.771155	0.119297	0.138384	0.781079	0.0951235	0.102837	0.804009	0.142272	0.121317
TTR1		1217.56	1328.28	1275.5	1005.95	1004.02	1078.07	1085.89	1176.33	1200.38		1345.61	1367.96	1275.5	1108.33	1004.02	1078.07	1093.88	1176.33	1220.92		1329.69	1056.17	1085.98	1198.63		1338.43	1056.17	1139.18	1224.68		TTR1	0.789117	0.014079	0.0315173	0.851136	0.00681681	0.0154561	0.915016	0.0454358	0.0549224
TUP1		633.562	744.277	756.498	1222.95	1318.02	1250.07	1213.89	1285.33	1282.38		700.194	766.51	756.498	1347.42	1318.02	1250.07	1222.82	1285.33	1304.32		741.067	1332.72	1236.45	1294.83		745.936	1332.72	1297.03	1322.97		TUP1	1.78664	0.000252511	0.00487891	1.73879	0.000415674	0.00271981	1.77357	0.00026975	0.00278093
TYE7		2793.56	2964.28	2586.5	1477.95	1649.02	1956.07	1981.89	1935.33	1780.38		3087.36	3052.83	2586.5	1628.37	1649.02	1956.07	1996.48	1935.33	1810.85		2908.9	1638.7	1976.27	1873.09		2928.01	1638.7	2073.1	1913.8		TYE7	0.559662	0.00890083	0.0222695	0.708024	0.0209714	0.0314854	0.65362	0.0167366	0.0281185
UCF1		34365.6	36516.3	28164.5	29419.9	33287	32891.1	31236.9	37583.3	35347.4		37979.8	37607.1	28164.5	32414.4	33287	32891.1	31466.8	37583.3	35952.3		34583.8	32850.7	32178.9	36767.8		34811	32850.7	33755.5	37567		UCF1	0.943687	0.704892	0.516152	0.969678	0.605372	0.420355	1.07917	0.638251	0.398907
UGA32		150.562	143.277	192.498	162.946	177.016	226.073	168.888	179.331	166.377		166.397	147.557	192.498	179.531	177.016	226.073	170.131	179.331	169.224		168.817	178.273	198.102	174.278		169.926	178.273	207.808	178.066		UGA32	1.04912	0.613804	0.46079	1.22293	0.354227	0.262364	1.0479	0.772179	0.474523
UGP1		2981.56	3195.28	4168.5	2729.95	3003.02	2461.07	2471.89	3102.33	2883.38		3295.13	3290.73	4168.5	3007.81	3003.02	2461.07	2490.08	3102.33	2932.72		3584.79	3005.41	2475.58	3017.53		3608.34	3005.41	2596.86	3083.12		UGP1	0.832907	0.221738	0.220711	0.719684	0.0603814	0.0713656	0.854443	0.234272	0.181479
UME6		204.562	235.277	198.498	143.946	167.016	103.073	96.8882	130.331	92.3767		226.076	242.305	198.498	158.597	167.016	103.073	97.6013	130.331	93.9576		222.293	162.806	100.337	112.144		223.753	162.806	105.253	114.582		UME6	0.727614	0.0383587	0.067049	0.470396	0.00524141	0.0127281	0.512091	0.0141409	0.0250887
UPC2		149.562	192.277	162.498	490.946	533.016	367.073	338.888	344.331	390.377		165.292	198.021	162.498	540.915	533.016	367.073	341.383	344.331	397.057		175.27	536.965	354.228	370.694		176.422	536.965	371.582	378.752		UPC2	3.04365	0.00015676	0.00400052	2.10622	0.00201403	0.00678057	2.14686	0.00413736	0.010836
WH11		22900.6	25348.3	23746.5	35640.9	38189	49272.1	49413.9	60606.3	59947.4		25309	26105.5	23746.5	39268.6	38189	49272.1	49777.6	60606.3	60973.3		25053.7	38728.8	49524.8	60789.8		25218.3	38728.8	51951.2	62111.2		WH11	1.53574	0.000798743	0.0065923	2.06006	0.000114365	0.00254119	2.46294	3.57177e-05	0.00184994
YHB1		10245.6	10446.3	10483.5	1731.95	1965.02	1672.07	1535.89	2028.33	1860.38		11323.1	10758.3	10483.5	1908.23	1965.02	1672.07	1547.19	2028.33	1892.21		10855	1936.62	1609.63	1960.27		10926.3	1936.62	1688.49	2002.88		YHB1	0.177244	0.000101173	0.00400052	0.154535	9.31354e-05	0.00254119	0.183309	0.000105166	0.00192804
YWP1		170.562	163.277	167.498	221.946	252.016	232.073	211.888	241.331	263.377		188.5	168.154	167.498	244.536	252.016	232.073	213.448	241.331	267.884		174.717	248.276	222.76	254.608		175.865	248.276	233.674	260.142		YWP1	1.41174	0.00424767	0.0140568	1.32871	0.0237736	0.0343019	1.47921	0.00926144	0.0185229
ZAP1		37.5622	45.277	53.4975	30.9455	25.0156	29.0726	16.8882	33.3312	66.3767		41.5127	46.6295	53.4975	34.0953	25.0156	29.0726	17.0125	33.3312	67.5126		47.2133	29.5554	23.0425	50.4219		47.5235	29.5554	24.1714	51.5179		ZAP1	0.621913	0.0515002	0.078708	0.508621	0.0318347	0.0426125	1.08405	0.827492	0.500132
ZCF20		415.562	391.277	356.498	450.946	524.016	446.073	479.888	536.331	503.377		459.267	402.965	356.498	496.844	524.016	446.073	483.42	536.331	511.991		406.243	510.43	464.746	524.161		408.912	510.43	487.516	535.555		ZCF20	1.24826	0.0785832	0.106672	1.19223	0.247113	0.200396	1.30971	0.0580561	0.0632294
ZCF3		1191.56	1226.28	1013.5	1007.95	1083.02	1034.07	1019.89	938.331	962.377		1316.88	1262.91	1013.5	1110.54	1083.02	1034.07	1027.39	938.331	978.846		1197.76	1096.78	1030.73	958.589		1205.63	1096.78	1081.23	979.426		ZCF3	0.909711	0.465409	0.380681	0.896819	0.260259	0.206534	0.812376	0.14382	0.121693
ZCF31		80.5622	107.277	75.4975	161.946	176.016	152.073	135.888	147.331	156.377		89.035	110.482	75.4975	178.429	176.016	152.073	136.888	147.331	159.053		91.6714	177.222	144.48	153.192		92.2737	177.222	151.559	156.522		ZCF31	1.92061	0.0074224	0.020151	1.64249	0.0345352	0.0451395	1.69628	0.0212384	0.0323787
ZCF34		111.562	113.277	89.4975	121.946	126.016	117.073	114.888	117.331	154.377		123.295	116.661	89.4975	134.357	126.016	117.073	115.734	117.331	157.019		109.818	130.187	116.403	137.175		110.539	130.187	122.106	140.157		ZCF34	1.17774	0.233917	0.227846	1.10464	0.655829	0.441592	1.26793	0.263341	0.200626
ZCF39		820.562	869.277	987.498	852.946	856.016	859.073	918.888	939.331	965.377		906.861	895.244	987.498	939.761	856.016	859.073	925.652	939.331	981.898		929.868	897.888	892.362	960.614		935.977	897.888	936.082	981.496		ZCF39	0.959306	0.55866	0.432031	1.00011	0.465064	0.335511	1.04863	0.504612	0.332379
ZCF7		104.562	84.277	57.4975	77.9455	82.0156	88.0726	57.8882	93.3312	76.3767		115.559	86.7946	57.4975	85.879	82.0156	88.0726	58.3142	93.3312	77.6838		86.6171	83.9473	73.1934	85.5075		87.1861	83.9473	76.7794	87.3662		ZCF7	0.962852	0.909808	0.627521	0.880638	0.619364	0.424761	1.00206	0.963624	0.566837
ZRT1		72.5622	67.277	72.4975	20.9455	57.0156	43.0726	37.8882	46.3312	61.3767		80.1936	69.2867	72.4975	23.0774	57.0156	43.0726	38.167	46.3312	62.4271		73.9926	40.0465	40.6198	54.3791		74.4788	40.0465	42.6099	55.5612		ZRT1	0.53769	0.0840542	0.111722	0.572108	0.00526995	0.0127281	0.746	0.0748518	0.0732642
ZRT2		199.562	232.277	299.498	287.946	352.016	419.073	416.888	356.331	360.377		220.55	239.216	299.498	317.253	352.016	419.073	419.957	356.331	366.544		253.088	334.635	419.515	361.438		254.751	334.635	440.068	369.294		ZRT2	1.31358	0.0922043	0.117653	1.72745	0.0123772	0.0221791	1.44963	0.0395838	0.0506304
orf19.1424		298.562	298.277	330.498	399.946	449.016	364.073	394.888	411.331	385.377		329.962	307.187	330.498	440.653	449.016	364.073	397.795	411.331	391.972		322.549	444.834	380.934	401.652		324.668	444.834	399.597	410.382		orf19.1424	1.37012	0.00132059	0.0065923	1.23079	0.0355706	0.0459522	1.26401	0.00755943	0.0156894
orf19.1534		103.562	79.277	38.4975	87.9455	142.016	114.073	136.888	158.331	146.377		114.454	81.6452	38.4975	96.8969	142.016	114.073	137.896	158.331	148.882		78.1989	119.456	125.984	153.606		78.7127	119.456	132.157	156.945		orf19.1534	1.51762	0.299856	0.281335	1.67897	0.206579	0.177914	1.9939	0.0779552	0.0751757
orf19.1691		63.5622	65.277	1	87.9455	82.0156	43.0726	51.8882	64.3312	59.3767		70.2471	67.227	1	96.8969	82.0156	43.0726	52.2701	64.3312	60.3928		46.158	89.4562	47.6713	62.362		46.4613	89.4562	50.0069	63.7176		orf19.1691	1.92539	0.240869	0.23284	1.07631	0.962148	0.579407	1.37141	0.617726	0.388285
orf19.1862		4616.56	5165.28	5439.5	6216.95	6965.02	7828.07	7635.89	8137.33	7919.38		5102.09	5319.58	5439.5	6849.72	6965.02	7828.07	7692.09	8137.33	8054.9		5287.05	6907.37	7760.08	8096.12		5321.79	6907.37	8140.27	8272.11		orf19.1862	1.29794	0.00123162	0.0065923	1.52961	0.000372352	0.00271981	1.55438	0.000222609	0.00278093
orf19.2125		1218.56	1306.28	1289.5	1426.95	1589.02	1300.07	1317.89	1458.33	1351.38		1346.72	1345.3	1289.5	1572.18	1589.02	1300.07	1327.59	1458.33	1374.5		1327.17	1580.6	1313.83	1416.42		1335.89	1580.6	1378.2	1447.21		orf19.2125	1.18318	0.00207401	0.00912566	1.03167	0.648077	0.441592	1.08333	0.109527	0.0995698
orf19.3615		918.562	922.277	855.498	852.946	987.016	852.073	847.888	844.331	827.377		1015.17	949.828	855.498	939.761	987.016	852.073	854.129	844.331	841.536		940.164	963.388	853.101	842.934		946.341	963.388	894.897	861.257		orf19.3615	1.01801	0.734373	0.531063	0.945639	0.241661	0.197416	0.910091	0.202667	0.162725
orf19.409		4626.56	5002.28	4848.5	2961.95	3164.02	3517.07	3543.89	3765.33	3469.38		5113.14	5151.71	4848.5	3263.42	3164.02	3517.07	3569.97	3765.33	3528.75		5037.78	3213.72	3543.52	3647.04		5070.88	3213.72	3717.13	3726.32		orf19.409	0.633759	0.00075712	0.0065923	0.733035	0.00124715	0.00461862	0.734846	0.00272595	0.00832929
orf19.411		182.562	188.277	275.498	315.946	352.016	382.073	400.888	245.331	257.377		201.762	193.901	275.498	348.103	352.016	382.073	403.839	245.331	261.781		223.72	350.059	392.956	253.556		225.19	350.059	412.208	259.068		orf19.411	1.55451	0.0328422	0.0583942	1.83049	0.0162404	0.0261494	1.15044	0.446071	0.29738
orf19.4174		338.562	375.277	430.498	378.946	389.016	383.073	413.888	347.331	367.377		374.169	386.487	430.498	417.516	389.016	383.073	416.935	347.331	373.664		397.051	403.266	400.004	360.497		399.66	403.266	419.601	368.334		orf19.4174	1.00902	0.816119	0.578538	1.0499	0.914896	0.560598	0.921618	0.227423	0.177422
orf19.449		2756.56	3212.28	3838.5	2872.95	3088.02	3182.07	3110.89	3142.33	2933.38		3046.47	3308.23	3838.5	3165.36	3088.02	3182.07	3133.79	3142.33	2983.58		3397.73	3126.69	3157.93	3062.95		3420.06	3126.69	3312.65	3129.53		orf19.449	0.914221	0.435795	0.365838	0.968594	0.484262	0.347107	0.915053	0.354629	0.246894
orf19.4706		640.562	751.277	743.498	927.946	984.016	770.073	695.888	910.331	874.377		707.93	773.719	743.498	1022.39	984.016	770.073	701.01	910.331	889.34		741.716	1003.2	735.541	899.836		746.589	1003.2	771.578	919.396		orf19.4706	1.34372	0.00271205	0.0108143	1.03347	0.87323	0.548112	1.23146	0.00869782	0.0177178
orf19.5517		258.562	291.277	162.498	114.946	128.016	154.073	108.888	172.331	200.377		285.755	299.978	162.498	126.645	128.016	154.073	109.69	172.331	203.806		249.41	127.33	131.881	188.069		251.049	127.33	138.342	192.157		orf19.5517	0.507193	0.118869	0.138384	0.551057	0.139163	0.133961	0.765415	0.364715	0.250741
orf19.5626		1490.56	1667.28	1204.5	1584.95	1784.02	1886.07	1800.89	2553.33	2466.38		1647.32	1717.08	1204.5	1746.27	1784.02	1886.07	1814.14	2553.33	2508.58		1522.97	1765.14	1850.11	2530.96		1532.97	1765.14	1940.75	2585.97		orf19.5626	1.15145	0.327867	0.303158	1.266	0.215383	0.181739	1.6869	0.0167393	0.0281185
orf19.5848		250.562	319.277	351.498	271.946	329.016	280.073	265.888	268.331	243.377		276.914	328.815	351.498	299.625	329.016	280.073	267.845	268.331	247.542		319.075	314.32	273.959	257.936		321.172	314.32	287.381	263.543		orf19.5848	0.978667	0.886121	0.616543	0.894789	0.215928	0.181739	0.820568	0.130212	0.113677
orf19.6578		1834.56	2107.28	1850.5	1661.95	1906.02	2260.07	2262.89	1677.33	1628.38		2027.5	2170.23	1850.5	1831.1	1906.02	2260.07	2279.54	1677.33	1656.24		2016.08	1868.56	2269.81	1666.79		2029.32	1868.56	2381.01	1703.02		orf19.6578	0.92078	0.315195	0.293568	1.17331	0.124014	0.124125	0.839206	0.0615242	0.0654701
orf19.6660		216.562	259.277	253.498	459.946	452.016	388.073	403.888	461.331	426.377		239.338	267.022	253.498	506.76	452.016	388.073	406.861	461.331	433.673		253.286	479.388	397.467	447.502		254.95	479.388	416.94	457.23		orf19.6660	1.88032	0.00219881	0.00935227	1.63538	0.00138913	0.00497845	1.79341	0.00091525	0.00437728
orf19.670.2		35350.6	41057.3	43613.5	36941.9	42325	44587.1	44022.9	39997.3	40074.4		39068.4	42283.8	43613.5	40702	42325	44587.1	44346.9	39997.3	40760.2		41655.2	41513.5	44467	40378.8		41928.9	41513.5	46645.6	41256.5		orf19.670.2	0.990093	0.943579	0.647315	1.11249	0.205314	0.177914	0.983963	0.521805	0.341658
ARP3		821.562	873.277	1075.5	1023.95	1098.02	940.073	981.888	995.331	995.377		907.966	899.364	1075.5	1128.17	1098.02	940.073	989.115	995.331	1012.41		960.942	1113.09	964.594	1003.87		967.256	1113.09	1011.85	1025.69		ARP3	1.15077	0.135035	0.151145	1.04611	0.964809	0.579407	1.06041	0.603871	0.383964
CLN3		1113.56	1226.28	728.498	1147.95	1288.02	1150.07	1107.89	1425.33	1431.38		1230.68	1262.91	728.498	1264.79	1288.02	1150.07	1116.04	1425.33	1455.87		1074.03	1276.4	1133.06	1440.6		1081.08	1276.4	1188.57	1471.92		CLN3	1.18067	0.432016	0.365068	1.09942	0.808977	0.513585	1.36152	0.199734	0.16155
CMK2		886.562	995.277	1107.5	831.946	967.016	803.073	777.888	904.331	820.377		979.802	1025.01	1107.5	916.623	967.016	803.073	783.614	904.331	834.416		1037.44	941.819	793.343	869.374		1044.25	941.819	832.212	888.272		CMK2	0.901908	0.162007	0.175187	0.796945	0.0153786	0.0255009	0.850629	0.0548074	0.0602881
YRA1		1011.56	1129.28	990.498	1113.95	1176.02	1083.07	1076.89	1201.33	1202.38		1117.95	1163.01	990.498	1227.33	1176.02	1083.07	1084.81	1201.33	1222.95		1090.49	1201.67	1083.94	1212.14		1097.65	1201.67	1137.05	1238.49		YRA1	1.09477	0.207351	0.215106	1.03589	0.928047	0.563421	1.12831	0.167821	0.137764
orf19.3456		79.5622	134.277	98.4975	137.946	170.016	129.073	103.888	209.331	172.377		87.9298	138.288	98.4975	151.986	170.016	129.073	104.653	209.331	175.327		108.239	161.001	116.863	192.329		108.95	161.001	122.588	196.51		orf19.3456	1.47775	0.0858561	0.112941	1.12518	0.718667	0.478107	1.80367	0.0373397	0.0488712
Sum		724342	777296	800598	731429	805876	768220	762607	788714	775443											Sum	800598	805858	768220	788714
NF		1.10528	1.02998	1	1.10178	1	1	1.00736	1	1.01711											NF_WT	1.00657	1	1.04899	1.02174

## Sheet: In vivo_Ear
Probe Name		Counts after Background subtraction																	1		Normalize count - WT						Normalize count - Δ/EFG1				Normalize count - Δ/TEC1				Normalize count -Δ/EFG1+Δ/TEC1					Avg_Individual replicates					Normalize to WT_Avg
		WT_E1	WT_E2	WT_E3	WT_E4	WT_E5	WT_E6	Δ/EFG1	Δ/EFG1	Δ/EFG1	Δ/EFG1	Δ/TEC1	Δ/TEC1	Δ/TEC1	Δ/TEC1	Δ/EFG1+Δ/TEC1	Δ/EFG1+Δ/TEC1	Δ/EFG1+Δ/TEC1	Δ/EFG1+Δ/TEC1		WT_E1	WT_E2	WT_E3	WT_E4	WT_E5	WT_E6	Δ/EFG1	Δ/EFG1	Δ/EFG1	Δ/EFG1	Δ/TEC1	Δ/TEC1	Δ/TEC1	Δ/TEC1	Δ/EFG1+Δ/TEC1	Δ/EFG1+Δ/TEC1	Δ/EFG1+Δ/TEC1	Δ/EFG1+Δ/TEC1		Avg_WT	Δ/EFG1_Avg	Δ/TEC1_Avg	Δ/EFG1+Δ/TEC1_Avg		WT	Δ/EFG1	Δ/TEC1	Δ/EFG1+Δ/TEC1
ACE2		171.094	146.52	201.292	167.844	191.765	106.039	484.513	677.716	454.01	548.639	93.0656	34.2378	67.2295	20.6884	667.585	401.619	610.92	179.351		186.906	177.066	201.292	186.264	253.157	255.536	552.675	677.716	777.213	606.513	93.0656	86.0397	87.3733	39.6339	682.434	644.506	610.92	427.006		210.037	653.529	76.5281	591.217		210.037	2704.18	316.909	1789.84
ACS1		1412.09	2601.52	1574.29	2954.84	1594.76	1414.04	971.513	877.716	799.01	706.639	338.066	204.238	229.23	178.688	1561.58	543.619	1619.92	370.351		1542.6	3143.87	1574.29	3279.13	2105.32	3407.61	1108.19	877.716	1367.81	781.18	338.066	513.25	297.913	342.322	1596.32	872.384	1619.92	881.746		2508.8	1033.72	372.888	1242.59		2508.8	4277.36	1544.16	3761.8
ACS2		723.094	1369.52	731.292	1497.84	612.765	280.039	122.513	279.716	145.01	202.639	163.066	51.2378	117.23	21.6884	349.585	188.619	284.92	90.3509		789.921	1655.03	731.292	1662.23	808.937	674.85	139.748	279.716	248.241	224.015	163.066	128.761	152.355	41.5496	357.361	302.69	284.92	215.111		1053.71	222.93	121.433	290.021		1053.71	922.443	502.863	878.003
ADH5		24870.1	12890.5	27998.3	14068.8	20733.8	14121	6279.51	3872.72	2853.01	4224.64	6908.07	3625.24	4934.23	6825.69	9674.58	5887.62	11090.9	5074.35		27168.5	15577.9	27998.3	15612.8	27371.5	34029.5	7162.91	3872.72	4884.02	4670.28	6908.07	9110.23	6412.65	13076.3	9889.79	9448.28	11090.9	12081.2		24626.4	5147.48	8876.82	10627.5		24626.4	21299.3	36759.7	32173.6
AHR1		2491.09	1344.52	2530.29	1423.84	2911.76	1402.04	561.513	702.716	366.01	701.639	1000.07	243.238	768.23	321.688	499.585	270.619	457.92	145.351		2721.31	1624.82	2530.29	1580.1	3843.95	3378.7	640.507	702.716	626.567	775.652	1000.07	611.257	998.411	616.275	510.697	434.281	457.92	346.057		2613.2	686.361	806.502	437.239		2613.2	2840.03	3339.79	1323.69
ALS1		4263.09	2930.52	4923.29	3157.84	5836.76	3520.04	2793.51	2989.72	1639.01	2836.64	1214.07	576.238	839.23	876.688	3749.58	1897.62	3920.92	1514.35		4657.08	3541.46	4923.29	3504.4	7705.36	8482.75	3186.5	2989.72	2805.8	3135.86	1214.07	1448.09	1090.68	1679.52	3832.99	3045.24	3920.92	3605.43		5469.06	3029.47	1358.09	3601.14		5469.06	12535.4	5623.96	10902
ALS2		42.094	46.5205	41.2919	62.8437	30.7649	4.03852	1	1	1	1	1	1	1	1	44.5846	56.6191	1	1		45.9842	56.2188	41.2919	69.7406	40.6141	9.73221	1	1	1	1	1	1	1	1	45.5763	90.8606	1	1		43.9303	1	1	34.6092		43.9303	1	1	104.775
ALS3		10774.1	10238.5	10950.3	11292.8	8766.76	3759.04	1223.51	2454.72	885.01	2233.64	1727.07	425.238	1412.23	498.688	1221.58	676.619	1143.92	390.351		11769.8	12373	10950.3	12532.2	11573.4	9058.7	1395.64	2454.72	1515.04	2469.26	1727.07	1068.62	1835.37	955.363	1248.76	1085.82	1143.92	929.363		11376.2	1958.66	1396.61	1101.96		11376.2	8104.58	5783.46	3336.07
ALS4		4614.09	648.52	4714.29	781.844	978.765	1001.04	555.513	326.716	371.01	254.639	151.066	251.238	151.23	295.688	643.585	319.619	630.92	190.351		5040.52	783.721	4714.29	867.648	1292.11	2412.35	633.663	326.716	635.127	281.5	151.066	631.361	196.542	566.465	657.901	512.915	630.92	453.195		2518.44	469.251	386.359	563.733		2518.44	1941.68	1599.94	1706.63
ALS5		105.094	35.5205	114.292	21.8437	114.765	27.0385	1	1	1	1	1	1	1	1	1	1	1	1		114.807	42.9256	114.292	24.241	151.506	65.1587	1	1	1	1	1	1	1	1	1	1	1	1		85.4883	1	1	1		85.4883	1	1	1
ALS6		1	1	1	1	1	1	1	1	1	1	1	1	1	1	1	1	1	1		1	1	1	1	1	1	1	1	1	1	1	1	1	1	1	1	1	1		1	1	1	1		1	1	1	1
ALS7		758.094	512.52	810.292	548.844	1489.76	922.039	524.513	347.716	382.01	253.639	261.066	104.238	190.23	126.688	501.585	269.619	418.92	175.351		828.155	619.368	810.292	609.077	1966.7	2221.97	598.302	347.716	653.957	280.395	261.066	261.95	247.227	242.703	512.742	432.677	418.92	417.482		1175.93	470.092	253.237	445.455		1175.93	1945.16	1048.67	1348.56
ALS9		56.094	76.5205	82.2919	86.8437	52.7649	6.03852	1	1	1	1	1	1	1		1	1	1	1		61.2781	92.4731	82.2919	96.3745	69.6572	14.5519	1	1	1	1	1	1	1	1	1	1	1	1		69.4378	1	1	1		69.4378	1	1	1
AOX2		4342.09	2849.52	4840.29	3008.84	3898.76	1830.04	2477.51	2620.72	2029.01	2136.64	736.066	313.238	580.23	339.688	1513.58	971.619	1392.92	435.351		4743.38	3443.57	4840.29	3339.05	5146.93	4410.11	2826.05	2620.72	3473.43	2362.02	736.066	787.168	754.081	650.758	1547.25	1559.23	1392.92	1036.5		4320.56	2820.56	732.018	1383.97		4320.56	11670.9	3031.35	4189.82
ARG1		140.094	142.52	139.292	170.844	93.7649	31.0385	1	62.716	22.0102	1	14.0656	11.2378	14.2295	1	106.585	69.6191	63.9202	1		153.041	172.232	139.292	189.593	123.783	74.798	1	62.716	37.679	1.10549	14.0656	28.2406	18.4931	1	108.955	111.723	63.9202	1		142.123	25.6251	15.4498	71.3996		142.123	106.032	63.979	216.154
ARG81		135.094	167.52	142.292	175.844	316.765	112.039	1	10.716	48.0102	7.63948	66.0656	19.2378	56.2295	1	41.5846	37.6191	42.9202	1		147.579	202.444	142.292	195.142	418.175	269.996	1	10.716	82.188	8.44534	66.0656	48.3446	73.0774	1	42.5096	60.3699	42.9202	1		229.271	25.5873	47.1219	36.6999		229.271	105.876	195.136	111.105
BCR1		778.094	557.52	929.292	566.844	1228.76	648.039	446.513	558.716	407.01	440.639	442.066	153.238	325.23	141.688	491.585	255.619	571.92	149.351		850.004	673.75	929.292	629.053	1622.15	1561.67	509.329	558.716	696.755	487.121	442.066	385.087	422.677	271.44	502.519	410.21	571.92	355.58		1044.32	562.98	380.317	460.057		1044.32	2329.51	1574.93	1392.77
BRG1		3437.09	1575.52	4080.29	1761.84	4078.76	2210.04	1137.51	1237.72	595.01	1137.64	1485.07	326.238	1075.23	552.688	1122.58	560.619	1282.92	441.351		3754.74	1903.98	4080.29	1955.2	5384.55	5325.85	1297.54	1237.72	1018.59	1257.64	1485.07	819.837	1397.4	1058.81	1147.56	899.665	1282.92	1050.79		3734.1	1202.87	1190.28	1095.23		3734.1	4977.26	4929.04	3315.68
CAP1		1603.09	1206.52	1642.29	1321.84	1829.76	928.039	403.513	601.716	375.01	518.639	660.066	162.238	544.23	176.688	542.585	362.619	521.92	198.351		1751.25	1458.05	1642.29	1466.91	2415.55	2236.43	460.28	601.716	641.974	573.348	660.066	407.704	707.295	338.491	554.654	581.92	521.92	472.242		1828.41	569.33	528.389	532.684		1828.41	2355.78	2188.1	1612.64
CAT1		2842.09	1639.52	2983.29	1719.84	907.765	788.039	443.513	548.716	398.01	494.639	273.066	109.238	252.23	80.6884	1071.58	402.619	1034.92	237.351		3104.75	1981.32	2983.29	1908.59	1198.38	1899.05	505.907	548.716	681.348	546.817	273.066	274.515	327.804	154.579	1095.42	646.111	1034.92	565.094		2179.23	570.697	257.491	835.387		2179.23	2361.44	1066.29	2529.03
CDC10		337.094	691.52	382.292	773.844	224.765	99.0385	1	1	1	1	1	1	1	1	1	1	1	1		368.247	835.685	382.292	858.77	296.722	238.668	1	1	1	1	1	1	1	1	1	1	1	1		496.731	1	1	1		496.731	1	1	1
CDR1		1427.09	1467.52	1524.29	1710.84	1858.76	741.039	507.513	858.716	363.01	756.639	485.066	155.238	346.23	215.688	701.585	349.619	714.92	265.351		1558.98	1773.46	1524.29	1898.6	2453.84	1785.79	578.91	858.716	621.432	836.454	485.066	390.113	449.969	413.205	717.191	561.058	714.92	631.758		1832.49	723.878	434.588	656.232		1832.49	2995.27	1799.67	1986.66
CDR2		21.094	25.5205	15.2919	28.8437	1	1	1	1	1	1	1	1	1	1	1	1	1	1		23.0434	30.8408	15.2919	32.0092	1.32014	2.40985	1	1	1	1	1	1	1	1	1	1	1	1		17.4859	1	1	1		17.4859	1	1	1
CHT2		111.094	1230.52	111.292	1301.84	118.765	92.0385	1	21.716	16.0102	2.63948	39.0656	6.23778	13.2295	1	69.5846	42.6191	80.9202	1		121.361	1487.05	111.292	1444.72	156.787	221.799	1	21.716	27.4077	2.91791	39.0656	15.6756	17.1935	1	71.1324	68.3938	80.9202	2.38084		590.501	13.2604	18.2337	55.7068		590.501	54.869	75.5071	168.646
CHT3		298.094	186.52	318.292	190.844	254.765	151.039	125.513	83.716	119.01	66.6395	47.0656	45.2378	52.2295	60.6884	330.585	224.619	280.92	119.351		325.643	225.405	318.292	211.788	336.326	363.98	143.171	83.716	203.732	73.669	47.0656	113.683	67.8789	116.264	337.938	360.462	280.92	284.155		296.906	126.072	86.2228	315.869		296.906	521.662	357.056	956.255
CIT1		2130.09	2954.52	2228.29	3167.84	2202.76	1362.04	1099.51	1420.72	909.01	1211.64	390.066	278.238	326.23	292.688	1258.58	778.619	1282.92	456.351		2326.95	3570.46	2228.29	3515.5	2907.96	3282.3	1254.19	1420.72	1556.12	1339.45	390.066	699.212	423.976	560.718	1286.58	1249.5	1282.92	1086.5		2971.91	1392.62	518.493	1226.38		2971.91	5762.4	2147.12	3712.71
CPH1		121.094	124.52	136.292	159.844	71.7649	15.0385	1	37.716	10.0102	5.63948	1	1	1	1	35.5846	28.6191	1	1		132.285	150.48	136.292	177.386	94.7399	36.2405	1	37.716	17.1364	6.23437	1	1	1	1	36.3761	45.927	1	1		121.237	15.5217	1	21.0758		121.237	64.2258	1	63.8044
CPH2		1306.09	1103.52	1407.29	1350.84	1844.76	872.039	1501.51	1103.72	873.01	1108.64	969.066	557.238	625.23	927.688	2683.58	2062.62	2752.92	1515.35		1426.8	1333.58	1407.29	1499.09	2435.35	2101.48	1712.75	1103.72	1494.49	1225.58	969.066	1400.34	812.565	1777.22	2743.28	3310.03	2752.92	3607.81		1700.6	1384.13	1239.8	3103.51		1700.6	5727.29	5134.11	9395.5
CRH11		609.094	1114.52	634.292	1133.84	888.765	409.039	447.513	424.716	178.01	518.639	237.066	106.238	140.23	174.688	433.585	230.619	495.92	174.351		665.385	1346.87	634.292	1258.28	1173.3	985.72	510.469	424.716	304.733	573.348	237.066	266.976	182.246	334.659	443.229	370.091	495.92	415.101		1010.64	453.317	255.237	431.085		1010.64	1875.74	1056.96	1305.06
CSA1		2691.09	19588.5	2922.29	21704.8	3442.76	1865.04	1866.51	2250.72	792.01	2674.64	3311.07	660.238	2315.23	1175.69	3456.58	2350.62	3729.92	2020.35		2939.8	23672.2	2922.29	24086.9	4544.94	4494.45	2129.09	2250.72	1355.83	2956.78	3311.07	1659.18	3008.93	2252.33	3533.47	3772.2	3729.92	4810.13		10443.4	2173.1	2557.88	3961.43		10443.4	8991.9	10592.4	11992.8
CSH1		1409.09	4572.52	1657.29	4830.84	903.765	500.039	271.513	641.716	252.01	522.639	442.066	103.238	312.23	163.688	925.585	545.619	892.92	323.351		1539.32	5525.78	1657.29	5361.01	1193.1	1205.02	309.71	641.716	431.412	577.77	442.066	259.437	405.782	313.586	946.173	875.593	892.92	769.847		2746.92	490.152	355.218	871.133		2746.92	2028.16	1470.99	2637.25
DAK2		341.094	267.52	388.292	294.844	151.765	93.0385	23.5133	18.716	38.0102	2.63948	34.0656	48.2378	1	1	231.585	159.619	233.92	96.3509		372.617	323.292	388.292	327.202	200.351	224.208	26.8212	18.716	65.0691	2.91791	34.0656	121.222	1	1	236.736	256.152	233.92	229.396		305.994	28.3811	39.3218	239.051		305.994	117.436	162.835	723.698
DDR48		7073.09	23028.5	7396.29	24984.8	6700.76	4604.04	1395.51	1972.72	1035.01	1646.64	1838.07	870.238	1428.23	1067.69	3802.58	2115.62	3729.92	1206.35		7726.77	27829.4	7396.29	27726.8	8845.97	11095	1591.83	1972.72	1771.82	1820.34	1838.07	2186.91	1856.16	2045.43	3887.17	3395.08	3729.92	2872.13		15103.4	1789.18	1981.64	3471.07		15103.4	7403.28	8206.14	10508.3
DFG5		269.094	632.52	279.292	644.844	275.765	94.0385	70.5133	116.716	46.0102	99.6395	98.0656	41.2378	78.2295	1	176.585	101.619	186.92	56.3509		293.963	764.385	279.292	715.613	364.049	226.618	80.4331	116.716	78.7642	110.15	98.0656	103.631	101.669	1	180.513	163.075	186.92	134.162		440.653	96.5158	76.0914	166.168		440.653	399.365	315.101	503.053
ECE1		179799	114509	193992	122733	151346	73162	12613.5	22009.7	8225.01	20155.6	34241.1	10759.2	26554.2	15151.7	14520.6	10312.6	14662.9	7443.35		196416	138381	193992	136202	199798	176309	14388	22009.7	14080.3	22281.8	34241.1	27038	34510.6	29026.9	14843.6	16549.4	14662.9	17721.4		173516	18189.9	31204.1	15944.3		173516	75266.6	129219	48269.6
ECM331		1322.09	1807.52	1346.29	1962.84	1303.76	819.039	105.513	487.716	121.01	405.639	459.066	46.2378	392.23	1	265.585	131.619	249.92	66.3509		1444.28	2184.34	1346.29	2178.26	1721.16	1973.76	120.357	487.716	207.156	448.429	459.066	116.196	509.752	1	271.492	211.218	249.92	157.971		1808.01	315.914	271.503	222.65		1808.01	1307.19	1124.32	674.048
EFG1		664.094	1408.52	718.292	1477.84	1156.76	438.039	154.513	204.716	114.01	171.639	325.066	99.2378	238.23	138.688	250.585	141.619	275.92	100.351		725.468	1702.16	718.292	1640.03	1527.1	1055.61	176.25	204.716	195.172	189.745	325.066	249.385	309.609	265.692	256.159	227.266	275.92	238.919		1228.11	191.471	287.438	249.566		1228.11	792.271	1190.31	755.531
ELF1		125.094	103.52	156.292	124.844	112.765	36.0385	35.5133	185.716	43.0102	177.639	1	1	1	1	111.585	98.6191	105.92	74.3509		136.655	125.102	156.292	138.545	148.866	86.8473	40.5094	185.716	73.6285	196.378	1	1	1	1	114.067	158.261	105.92	177.018		132.051	124.058	1	138.816		132.051	513.329	1	420.25
ENA2		1303.09	1418.52	1430.29	1582.84	1605.76	982.039	728.513	773.716	692.01	609.639	676.066	545.238	537.23	484.688	1495.58	847.619	1509.92	424.351		1423.52	1714.25	1430.29	1756.55	2119.84	2366.56	831	773.716	1184.64	673.948	676.066	1370.18	698.198	928.542	1528.85	1360.23	1509.92	1010.31		1801.84	865.826	918.247	1352.33		1801.84	3582.63	3802.54	4094.02
ENA21		2159.09	3905.52	2424.29	4270.84	2266.76	1050.04	989.513	1537.72	763.01	1198.64	1085.07	596.238	790.23	750.688	1571.58	1203.62	1442.92	679.351		2358.63	4719.72	2424.29	4739.55	2992.45	2530.43	1128.72	1537.72	1306.19	1325.08	1085.07	1498.35	1027	1438.13	1606.54	1931.53	1442.92	1617.43		3294.18	1324.42	1262.14	1649.61		3294.18	5480.22	5226.62	4993.98
FAV2		166.094	116.52	170.292	93.8437	125.765	26.0385	1	1	1	1	1	1	1	1	37.5846	26.6191	1	1		181.444	140.812	170.292	104.143	166.028	62.7488	1	1	1	1	1	1	1	1	38.4206	42.7175	1	1		137.578	1	1	20.7845		137.578	1	1	62.9227
FBP1		1521.09	1090.52	1716.29	1217.84	924.765	399.039	386.513	535.716	314.01	430.639	184.066	201.238	131.23	182.688	743.585	446.619	699.92	222.351		1661.67	1317.87	1716.29	1351.5	1220.82	961.621	440.888	535.716	537.549	476.066	184.066	505.711	170.549	349.985	760.125	716.721	699.92	529.382		1371.63	497.555	302.578	676.537		1371.63	2058.79	1253	2048.14
FDH1		1346.09	2555.52	1463.29	2957.84	1938.76	1222.04	1058.51	664.716	609.01	560.639	332.066	200.238	204.23	399.688	1644.58	585.619	1776.92	418.351		1470.5	3088.28	1463.29	3282.45	2559.45	2944.92	1207.42	664.716	1042.56	619.779	332.066	503.198	265.422	765.703	1681.17	939.784	1776.92	996.026		2468.15	883.619	466.597	1348.47		2468.15	3656.25	1932.22	4082.35
FGR15		62.094	55.5205	50.2919	56.8437	47.7649	1	1	1	1	1	1	1	1	1	1	1	1	1		67.8326	67.0951	50.2919	63.0821	63.0565	2.40985	1	1	1	1	1	1	1	1	1	1	1	1		52.2947	1	1	1		52.2947	1	1	1
FKH2		133.094	63.5205	115.292	92.8437	53.7649	24.0385	1	1	1	1	1	1	1	1	1	1	1	1		145.394	76.7629	115.292	103.033	70.9773	57.9291	1	1	1	1	1	1	1	1	1	1	1	1		94.8981	1	1	1		94.8981	1	1	1
FRP1		1156.09	4330.52	1321.29	4775.84	3064.76	1018.04	739.513	1440.72	559.01	1154.64	3080.07	827.238	2464.23	926.688	1655.58	1868.62	1541.92	1086.35		1262.94	5233.33	1321.29	5299.97	4045.93	2453.32	843.548	1440.72	956.961	1276.44	3080.07	2078.85	3202.58	1775.3	1692.41	2998.7	1541.92	2586.43		3269.46	1129.42	2534.2	2204.87		3269.46	4673.31	10494.3	6674.97
FRP2		493.094	2073.52	501.292	2195.84	504.765	275.039	127.513	538.716	156.01	441.639	340.066	117.238	251.23	96.6884	365.585	315.619	308.92	180.351		538.665	2505.8	501.292	2436.83	666.362	662.8	145.452	538.716	267.072	488.226	340.066	294.619	326.504	185.231	373.717	506.496	308.92	429.387		1218.62	359.866	286.605	404.63		1218.62	1489.06	1186.86	1224.97
FRP3		1190.09	1491.52	1242.29	1489.84	1033.76	866.039	841.513	838.716	552.01	748.639	210.066	75.2378	180.23	84.6884	845.585	314.619	827.92	195.351		1300.08	1802.47	1242.29	1653.35	1364.72	2087.02	959.897	838.716	944.978	827.61	210.066	189.073	234.231	162.242	864.394	504.891	827.92	465.099		1574.99	892.8	198.903	665.576		1574.99	3694.24	823.673	2014.95
FTR1		5565.09	9311.52	6044.29	10192.8	8183.76	3451.04	1899.51	2986.72	1066.01	2812.64	2064.07	878.238	1500.23	1273.69	3013.58	2245.62	3254.92	1727.35		6079.41	11252.7	6044.29	11311.5	10803.7	8316.47	2166.74	2986.72	1824.89	3109.33	2064.07	2207.01	1949.74	2440.07	3080.62	3603.7	3254.92	4112.55		8968.02	2521.92	2165.22	3512.95		8968.02	10435.2	8966.37	10635
GAL1		7377.09	3094.52	7823.29	3351.84	6504.76	3427.04	1314.51	1380.72	1080.01	1228.64	1773.07	464.238	1438.23	587.688	2371.58	1075.62	2160.92	684.351		8058.87	3739.65	7823.29	3719.69	8587.22	8258.63	1499.44	1380.72	1848.85	1358.24	1773.07	1166.63	1869.16	1125.86	2424.34	1726.12	2160.92	1629.33		6697.89	1521.81	1483.68	1985.18		6697.89	6296.98	6144.05	6009.89
GAL4		758.094	744.52	821.292	850.844	616.765	438.039	134.513	179.716	134.01	149.639	238.066	88.2378	158.23	77.6884	260.585	142.619	286.92	62.3509		828.155	899.734	821.292	944.22	814.218	1055.61	153.437	179.716	229.41	165.424	238.066	221.742	205.639	148.832	266.381	228.871	286.92	148.447		893.871	181.997	203.57	232.655		893.871	753.069	842.999	704.335
GAP2		327.094	1032.52	398.292	1134.84	542.765	528.039	351.513	208.716	269.01	124.639	72.0656	98.2378	52.2295	114.688	1165.58	520.619	1064.92	286.351		357.323	1247.78	398.292	1259.39	716.527	1272.49	400.964	208.716	460.514	137.787	72.0656	246.872	67.8789	219.714	1191.51	835.474	1064.92	681.755		875.3	301.995	151.633	943.415		875.3	1249.6	627.924	2856.08
GCA2		1561.09	385.52	1629.29	395.844	417.765	326.039	156.513	81.716	171.01	43.6395	103.066	48.2378	73.2295	1	275.585	154.619	287.92	56.3509		1705.37	465.892	1629.29	439.286	551.509	785.702	178.532	81.716	292.75	48.2428	103.066	121.222	95.171	1	281.715	248.128	287.92	134.162		929.508	150.31	80.1146	237.981		929.508	621.955	331.761	720.46
GCN4		2526.09	2770.52	2607.29	2791.84	2439.76	1283.04	1108.51	1272.72	751.01	1064.64	911.066	255.238	674.23	333.688	1012.58	494.619	1057.92	364.351		2759.55	3348.11	2607.29	3098.24	3220.84	3091.92	1264.46	1272.72	1285.64	1176.94	911.066	641.413	876.246	639.264	1035.11	793.75	1057.92	867.461		3020.99	1249.94	766.997	938.56		3020.99	5172.02	3176.2	2841.38
GIS2		748.094	361.52	825.292	384.844	539.765	273.039	259.513	365.716	202.01	294.639	102.066	43.2378	77.2295	1	367.585	195.619	388.92	173.351		817.231	436.888	825.292	427.079	712.567	657.981	296.022	365.716	345.818	325.72	102.066	108.657	100.37	1	375.761	313.924	388.92	412.721		646.173	333.319	78.023	372.831		646.173	1379.21	323.1	1128.7
GNP1		12312.1	6378.52	14128.3	6951.84	9610.76	5358.04	5103.51	3088.72	2371.01	3447.64	2434.07	1442.24	1780.23	2570.69	6954.58	5362.62	7975.92	4202.35		13449.9	7708.28	14128.3	7714.78	12687.6	12912	5821.47	3088.72	4058.9	3811.32	2434.07	3624.35	2313.63	4924.8	7109.28	8605.77	7975.92	10005.1		11433.5	4195.1	3324.21	8424.02		11433.5	17358.5	13765.8	25502.7
GPD2		399.094	176.52	467.292	177.844	499.765	246.039	206.513	326.716	155.01	376.639	143.066	62.2378	97.2295	75.6884	244.585	163.619	269.92	156.351		435.977	213.321	467.292	197.361	659.761	592.915	235.566	326.716	265.36	416.37	143.066	156.404	126.362	145	250.025	262.571	269.92	372.246		427.771	311.003	142.708	288.691		427.771	1286.87	590.965	873.977
HAC1		605.094	740.52	593.292	826.844	645.765	237.039	168.513	406.716	171.01	328.639	226.066	55.2378	163.23	1	448.585	279.619	359.92	149.351		661.015	894.901	593.292	917.586	852.502	571.226	192.22	406.716	292.75	363.306	226.066	138.813	212.137	1.91575	458.563	448.724	359.92	355.58		748.42	313.748	144.733	405.697		748.42	1298.23	599.351	1228.2
HAP2		184.094	324.52	189.292	393.844	468.765	171.039	102.513	226.716	75.0102	193.639	192.066	106.238	106.23	118.688	199.585	265.619	246.92	201.351		201.108	392.175	189.292	437.066	618.837	412.176	116.935	226.716	128.409	214.066	192.066	266.976	138.059	227.377	204.024	426.258	246.92	479.384		375.109	171.531	206.119	339.147		375.109	709.765	853.558	1026.73
HAP3		29.094	56.5205	26.2919	66.8437	41.7649	8.03852	1	1	1	1	1	1	1	1	1	1	1	1		31.7828	68.3036	26.2919	74.1796	55.1356	19.3716	1	1	1	1	1	1	1	1	1	1	1	1		45.8442	1	1	1		45.8442	1	1	1
HAP43		229.094	357.52	307.292	379.844	501.765	228.039	80.5133	284.716	126.01	177.639	163.066	61.2378	102.23	1	129.585	133.619	100.92	53.3509		250.266	432.055	307.292	421.53	662.401	549.538	91.8399	284.716	215.715	196.378	163.066	153.891	132.86	1	132.467	214.428	100.92	127.02		437.18	197.162	112.704	143.709		437.18	815.821	466.717	435.061
HEM1		161.094	115.52	159.292	152.844	187.765	45.0385	44.5133	86.716	30.0102	77.6395	46.0656	9.23778	14.2295	1	78.5846	49.6191	85.9202	32.3509		175.982	139.604	159.292	169.618	247.877	108.536	50.7755	86.716	51.374	85.8293	46.0656	23.2146	18.4931	1	80.3326	79.6272	85.9202	77.0223		166.818	68.6737	22.1933	80.7256		166.818	284.159	91.9044	244.387
HGT7		10475.1	3268.52	10598.3	3506.84	8920.76	4072.04	3494.51	3591.72	2266.01	3099.64	4121.07	1305.24	3187.23	1909.69	3192.58	2107.62	3381.92	1720.35		11443.2	3949.93	10598.3	3891.71	11776.7	9812.98	3986.12	3591.72	3879.15	3426.61	4121.07	3280.07	4142.21	3658.49	3263.6	3382.24	3381.92	4095.88		8578.79	3720.9	3800.46	3530.91		8578.79	15396.4	15738	10689.4
HOG1		211.094	396.52	234.292	434.844	172.765	74.0385	1	97.716	27.0102	61.6395	1	1	1	1	51.5846	44.6191	55.9202	1		230.603	479.185	234.292	482.566	228.074	178.421	1	97.716	46.2384	68.1416	1	1	1	1	52.732	71.6033	55.9202	1		305.524	53.274	1	45.3139		305.524	220.438	4.14108	137.182
HSP104		8048.09	2518.52	9155.29	2670.84	4472.76	3800.04	21730.5	16248.7	11258	16625.6	3603.07	2086.24	2597.23	3490.69	30038.6	18295.6	33494.9	15190.4		8791.88	3043.57	9155.29	2963.96	5904.69	9157.51	24787.6	16248.7	19272.4	18379.4	3603.07	5242.72	3375.43	6687.29	30706.8	29360.3	33494.9	36165.8		6502.82	19672	4727.13	32431.9		6502.82	81399.2	19575.4	98183.8
HSP70		10830.1	6390.52	12551.3	7130.84	4478.76	3663.04	11571.5	9063.72	7165.01	8077.64	3494.07	2205.24	2644.23	2874.69	13091.6	8772.62	14036.9	6069.35		11831	7722.78	12551.3	7913.42	5912.61	8827.36	13199.4	9063.72	12265.7	8929.71	3494.07	5541.77	3436.51	5507.19	13382.8	14078	14036.9	14450.1		9126.41	10864.6	4494.88	13987		9126.41	44955.8	18613.7	42343.9
HTA1		4114.09	4302.52	4320.29	4824.84	4038.76	2070.04	850.513	919.716	605.01	698.639	649.066	487.238	477.23	587.688	1543.58	1024.62	1598.92	636.351		4494.31	5199.49	4320.29	5354.35	5331.75	4988.47	970.163	919.716	1035.71	772.336	649.066	1224.43	620.22	1125.86	1577.92	1644.28	1598.92	1515.05		4948.11	924.481	904.895	1584.04		4948.11	3825.33	3747.25	4795.5
HTA2		1216.09	1544.52	1394.29	1625.84	1288.76	715.039	331.513	370.716	277.01	333.639	226.066	104.238	160.23	96.6884	547.585	316.619	532.92	183.351		1328.48	1866.51	1394.29	1804.27	1701.35	1723.13	378.151	370.716	474.21	368.834	226.066	261.95	208.238	185.231	559.765	508.101	532.92	436.529		1636.34	397.977	220.371	509.329		1636.34	1646.76	912.576	1541.93
HWP1		39715.1	43402.5	42031.3	48826.8	25640.8	14473	6147.51	7785.72	3610.01	7622.64	6985.07	3138.24	5293.23	4269.69	9203.58	5020.62	9752.92	3769.35		43385.5	52450.9	42031.3	54185.4	33849.5	34877.8	7012.34	7785.72	6179.92	8426.72	6985.07	7886.4	6879.22	8179.66	9408.31	8056.94	9752.92	8974.22		43463.4	7351.17	7482.59	9048.1		43463.4	30417.8	30986	27392
HYR1		6385.09	18549.5	7065.29	20574.8	3514.76	1656.04	320.513	793.716	212.01	772.639	1717.07	508.238	1201.23	615.688	723.585	461.619	743.92	343.351		6975.19	22416.6	7065.29	22832.8	4639.99	3990.8	365.603	793.716	362.937	854.142	1717.07	1277.2	1561.15	1179.51	739.68	740.792	743.92	817.463		11320.1	594.099	1433.73	760.464		11320.1	2458.27	5937.2	2302.21
IFD6		512.094	605.52	538.292	666.844	140.765	100.039	29.5133	39.716	54.0102	1	87.0656	69.2378	94.2295	45.6884	276.585	151.619	251.92	64.3509		559.42	731.756	538.292	740.027	185.83	241.077	33.6653	39.716	92.4593	1	87.0656	173.995	122.463	87.5276	282.737	243.314	251.92	153.209		499.401	41.7101	117.763	232.795		499.401	172.589	487.666	704.759
IHD1		4548.09	8534.52	5150.29	9013.84	5327.76	1973.04	981.513	2461.72	729.01	2160.64	1118.07	421.238	887.23	457.688	1373.58	1102.62	1312.92	677.351		4968.42	10313.8	5150.29	10003.1	7033.41	4754.72	1119.59	2461.72	1247.98	2388.56	1118.07	1058.57	1153.07	876.817	1404.14	1769.45	1312.92	1612.66		7037.28	1804.46	1051.63	1524.79		7037.28	7466.53	4354.89	4616.13
INO4		95.094	168.52	82.2919	192.844	112.765	40.0385	1	12.716	14.0102	1	1	1	1	1	32.5846	49.6191	42.9202	1		103.882	203.653	82.2919	214.008	148.866	96.4866	1	12.716	23.9839	1	1	1	1	1	33.3094	79.6272	42.9202	1		141.531	9.67497	1	39.2142		141.531	40.0332	1	118.716
IRE1		211.094	318.52	214.292	347.844	340.765	184.039	1	76.716	53.0102	1	50.0656	12.2378	20.2295	0.688419	148.585	111.619	131.92	50.3509		230.603	384.924	214.292	386.018	449.858	443.504	1	76.716	90.7474	1	50.0656	30.7536	26.2908	1.31884	151.89	179.123	131.92	119.877		351.533	42.3658	27.1072	145.703		351.533	175.302	112.253	441.097
IRO1		431.094	610.52	545.292	673.844	578.765	274.039	231.513	498.716	230.01	377.639	291.066	93.2378	249.23	1	170.585	139.619	130.92	64.3509		470.935	737.799	545.292	747.795	764.052	660.391	264.083	498.716	393.751	417.475	291.066	234.307	323.905	1.91575	174.379	224.056	130.92	153.209		654.377	393.506	212.798	170.641		654.377	1628.26	881.216	516.596
KIP4		996.094	1533.52	1092.29	1671.84	812.765	456.039	181.513	378.716	171.01	307.639	573.066	136.238	495.23	99.6884	265.585	176.619	241.92	96.3509		1088.15	1853.22	1092.29	1855.32	1072.97	1098.98	207.049	378.716	292.75	340.091	573.066	342.366	643.613	190.978	271.492	283.433	241.92	229.396		1343.49	304.651	437.506	256.56		1343.49	1260.59	1811.75	776.706
KRE1		449.094	550.52	460.292	640.844	750.765	350.039	81.5133	229.716	99.0102	173.639	147.066	23.2378	117.23	1	81.5846	37.6191	48.9202	1		490.598	665.29	460.292	711.174	991.117	843.539	92.9806	229.716	169.494	191.956	147.066	58.3966	152.355	1	83.3994	60.3699	48.9202	1		693.668	171.037	89.7042	48.4224		693.668	707.718	371.473	146.593
MAC1		87.094	194.52	85.2919	224.844	72.7649	23.0385	1	1	1	1	1	1	1	1	1	1	1	1		95.143	235.073	85.2919	249.519	96.0601	55.5193	1	1	1	1	1	1	1	1	1	1	1	1		136.101	1	1	1		136.101	1	1	1
MAE1		751.094	1056.52	893.292	1219.84	526.765	285.039	220.513	290.716	224.01	210.639	186.066	79.2378	133.23	1	576.585	320.619	516.92	184.351		820.508	1276.78	893.292	1353.72	695.405	686.899	251.535	290.716	383.48	232.859	186.066	199.125	173.149	1.91575	589.41	514.52	516.92	438.91		954.433	289.647	140.064	514.94		954.433	1198.51	580.016	1558.92
MBF1		1739.09	1864.52	2072.29	2030.84	1920.76	1033.04	364.513	666.716	320.01	484.639	675.066	264.238	490.23	268.688	728.585	385.619	658.92	201.351		1899.82	2253.23	2072.29	2253.72	2535.68	2489.46	415.793	666.716	547.821	535.762	675.066	664.03	637.115	514.74	744.791	618.83	658.92	479.384		2250.7	541.523	622.738	625.481		2250.7	2240.72	2578.81	1893.57
MDM34		10184.1	6119.52	10903.3	6895.84	10397.8	5753.04	2823.51	3211.72	2288.01	2717.64	3531.07	1468.24	2858.23	1683.69	4105.58	2724.62	3922.92	1543.35		11125.3	7395.29	10903.3	7652.63	13726.5	13863.9	3220.72	3211.72	3916.81	3004.31	3531.07	3689.69	3714.63	3225.53	4196.91	4372.39	3922.92	3674.47		10777.8	3338.39	3540.23	4041.67		10777.8	13813.6	14660.4	12235.7
MET28		612.094	560.52	627.292	608.844	513.765	205.039	175.513	301.716	122.01	238.639	158.066	72.2378	99.2295	82.6884	318.585	212.619	324.92	127.351		668.662	677.375	627.292	675.662	678.243	494.111	200.205	301.716	208.867	263.813	158.066	181.534	128.961	158.41	325.671	341.205	324.92	303.202		636.891	243.65	156.743	323.75		636.891	1008.18	649.085	980.113
NDT80		604.094	555.52	717.292	583.844	841.765	278.039	435.513	500.716	354.01	385.639	173.066	105.238	142.23	118.688	677.585	493.619	626.92	250.351		659.923	671.333	717.292	647.918	1111.25	670.03	496.781	500.716	606.025	426.319	173.066	264.463	184.845	227.377	692.657	792.145	626.92	596.045		746.291	507.46	212.438	676.942		746.291	2099.78	879.723	2049.36
NPR1		163.094	138.52	187.292	141.844	215.765	88.0385	1	44.716	26.0102	11.6395	75.0656	1	57.2295	1	1	1	1	1		178.167	167.399	187.292	157.411	284.841	212.159	1	44.716	44.5265	12.8673	75.0656	1	74.377	1	1	1	1	1		197.878	25.7774	37.8606	1		197.878	106.662	156.784	1
NRG1		1078.09	441.52	1194.29	482.844	2343.76	956.039	613.513	473.716	390.01	433.639	1324.07	370.238	984.23	503.688	1025.58	572.619	1096.92	368.351		1177.73	533.566	1194.29	535.834	3094.1	2303.91	699.822	473.716	667.653	479.382	1324.07	930.409	1279.13	964.942	1048.4	918.922	1096.92	876.984		1473.24	580.143	1124.64	985.306		1473.24	2400.53	4657.22	2982.9
PCK1		18953.1	11821.5	20346.3	12848.8	14040.8	6109.04	4759.51	4720.72	2399.01	4875.64	1727.07	1478.24	1252.23	2585.69	8087.58	4875.62	9030.92	3793.35		20704.7	14286	20346.3	14259	18535.8	14721.8	5429.08	4720.72	4106.83	5389.95	1727.07	3714.82	1627.43	4953.53	8267.49	7824.25	9030.92	9031.36		17142.3	4911.64	3005.71	8538.5		17142.3	20323.5	12446.9	25849.3
PES1		1.09399	1	4.29192	7.84374	3.76489	1	1	1	1	1	1	1	1	1	1	1	1	1		1.19509	1.20848	4.29192	8.70456	4.9702	2.40985	1	1	1	1	1	1	1	1	1	1	1	1		3.79668	1	1	1		3.79668	1	1	1
PFK2		2216.09	1424.52	2526.29	1551.84	3072.76	1403.04	1823.51	1249.72	811.01	1335.64	1338.07	682.238	969.23	1347.69	1400.58	1036.62	1724.92	940.351		2420.9	1721.5	2526.29	1722.15	4056.49	3381.11	2080.04	1249.72	1388.36	1476.53	1338.07	1714.47	1259.64	2581.84	1431.74	1663.54	1724.92	2238.82		2638.07	1548.66	1723.5	1764.75		2638.07	6408.08	7137.16	5342.58
PGA13		1301.09	5552.52	1436.29	5929.84	1844.76	1050.04	241.513	389.716	134.01	351.639	1639.07	211.238	1137.23	359.688	718.585	204.619	800.92	158.351		1421.34	6710.08	1436.29	6580.62	2435.35	2530.43	275.489	389.716	229.41	388.732	1639.07	530.841	1477.97	689.073	734.569	328.367	800.92	377.008		3519.02	320.837	1084.24	560.216		3519.02	1327.56	4489.92	1695.99
PGA17		4.09399	46.5205	18.2919	60.8437	90.7649	33.0385	24.5133	54.716	40.0102	25.6395	1	1	1	1	1	1	1	1		4.47234	56.2188	18.2919	67.5211	119.823	79.6177	27.9619	54.716	68.4929	28.3441	1	1	1	1	1	1	1	1		57.6574	44.8787	1	1		57.6574	185.7	1	1
PGA25		8.09399	32.5205	9.29192	39.8437	67.7649	38.0385	1	12.716	7.01023	1	1	1	1	1	53.5846	61.6191	1	1		8.84201	39.3002	9.29192	44.2164	89.4594	91.667	1	12.716	12.0007	1	1	1	1	1	54.7765	98.8844	1	1		47.1295	6.67917	1	38.9152		47.1295	27.6372	1	117.811
PGA34		795.094	786.52	847.292	863.844	1013.76	458.039	567.513	502.716	263.01	533.639	231.066	76.2378	187.23	151.688	603.585	380.619	707.92	298.351		868.575	950.49	847.292	958.647	1338.31	1103.8	647.351	502.716	450.243	589.931	231.066	191.586	243.328	290.597	617.011	610.806	707.92	710.326		1011.19	547.56	239.144	661.516		1011.19	2265.7	990.317	2002.66
PGA37		86.094	160.52	112.292	178.844	149.765	34.0385	1	24.716	20.0102	0.639482	43.0656	22.2378	28.2295	1	65.5846	82.6191	45.9202	27.3509		94.0506	193.985	112.292	198.471	197.711	82.0276	1	24.716	34.2552	0.706938	43.0656	55.8836	36.6878	1	67.0434	132.585	45.9202	65.1181		146.423	15.1695	34.1593	77.6666		146.423	62.7687	141.456	235.126
PGA48		5280.09	2991.52	5297.29	3195.84	4568.76	3080.04	846.513	886.716	629.01	801.639	1354.07	386.238	951.23	472.688	1655.58	1076.62	1547.92	638.351		5768.07	3615.18	5297.29	3546.57	6031.42	7422.42	965.601	886.716	1076.79	886.201	1354.07	970.617	1236.24	905.553	1692.41	1727.73	1547.92	1519.81		5280.16	953.828	1116.62	1621.97		5280.16	3946.76	4624.02	4910.31
PGA53		200.094	373.52	241.292	479.844	90.7649	56.0385	26.5133	51.716	37.0102	18.6395	6.06559	1	11.2295	1	128.585	75.6191	96.9202	26.3509		218.586	451.39	241.292	532.505	119.823	135.044	30.2432	51.716	63.3572	20.6057	6.06559	1	14.5942	1	131.445	121.351	96.9202	62.7372		283.107	41.4805	5.66495	103.113		283.107	171.639	23.459	312.163
PGA7		1374.09	6978.52	1615.29	7515.84	3021.76	1477.04	527.513	1277.72	369.01	1060.64	1341.07	373.238	995.23	459.688	1016.58	934.619	981.92	609.351		1501.08	8433.37	1615.29	8340.68	3989.16	3559.43	601.724	1277.72	631.703	1172.52	1341.07	937.948	1293.43	880.648	1039.2	1499.85	981.92	1450.77		4573.17	920.916	1113.27	1242.93		4573.17	3810.58	4610.15	3762.83
PHO89		846.094	1782.52	903.292	1989.84	924.765	654.039	627.513	914.716	343.01	948.639	712.066	101.238	569.23	120.688	387.585	159.619	370.92	92.3509		924.288	2154.13	903.292	2208.22	1220.82	1576.13	715.792	914.716	587.194	1048.71	712.066	254.411	739.786	231.209	396.206	256.152	370.92	219.873		1497.81	816.602	484.368	310.788		1497.81	3378.95	2005.81	940.873
PHR1		3664.09	7632.52	4072.29	8429.84	3667.76	1892.04	995.513	1725.72	553.01	1947.64	1120.07	246.238	841.23	439.688	1215.58	474.619	1429.92	430.351		4002.72	9223.71	4072.29	9354.98	4841.97	4559.52	1135.56	1725.72	946.69	2153.09	1120.07	618.796	1093.28	842.333	1242.62	761.654	1429.92	1024.6		6009.2	1490.26	918.62	1114.7		6009.2	6166.44	3804.08	3374.62
PHR2		737.094	988.52	851.292	1084.84	996.765	367.039	357.513	453.716	336.01	333.639	273.066	256.238	232.23	269.688	705.585	472.619	747.92	275.351		805.214	1194.6	851.292	1203.9	1315.87	884.506	407.808	453.716	575.211	368.834	273.066	643.926	301.812	516.656	721.28	758.445	747.92	655.566		1042.56	451.392	433.865	720.803		1042.56	1867.78	1796.67	2182.14
PIL1		5738.09	7381.52	6175.29	7946.84	2253.76	1895.04	968.513	971.716	688.01	793.639	666.066	361.238	519.23	395.688	2082.58	972.619	2002.92	648.351		6268.39	8920.38	6175.29	8818.98	2975.29	4566.75	1104.76	971.716	1177.79	877.357	666.066	907.792	674.804	758.04	2128.91	1560.83	2002.92	1543.62		6287.52	1032.91	751.676	1809.07		6287.52	4273.98	3112.75	5476.74
PIR1		7471.09	1993.52	8155.29	2080.84	3470.76	2936.04	987.513	655.716	634.01	642.639	1017.07	537.238	792.23	731.688	1163.58	344.619	1224.92	273.351		8161.55	2409.12	8155.29	2309.21	4581.91	7075.4	1126.44	655.716	1085.35	710.429	1017.07	1350.08	1029.6	1401.73	1189.47	553.034	1224.92	650.805		5448.75	894.483	1199.62	904.557		5448.75	3701.21	4967.73	2738.44
PLB5		231.094	408.52	263.292	427.844	371.765	129.039	16.5133	148.716	66.0102	87.6395	61.0656	11.2378	43.2295	1	66.5846	64.6191	79.9202	1		252.451	493.687	263.292	474.798	490.783	310.963	18.8364	148.716	113.002	96.8842	61.0656	28.2406	56.1822	1	68.0657	103.699	79.9202	1		380.996	94.3596	36.6221	63.1712		380.996	390.443	151.655	191.243
POL1		61.094	130.52	70.2919	119.844	49.7649	24.0385	1	1	1	1	1	1	1	1	1	1	1	1		66.7401	157.731	70.2919	132.996	65.6968	57.9291	1	1	1	1	1	1	1	1	1	1	1	1		91.8975	1	1	1		91.8975	1	1	1
PRA1		2050.09	23608.5	2497.29	26134.8	1580.76	1155.04	482.513	1927.72	320.01	1713.64	3750.07	405.238	2833.23	543.688	1436.58	470.619	1457.92	357.351		2239.56	28530.3	2497.29	29003	2086.84	2783.46	550.393	1927.72	547.821	1894.4	3750.07	1018.36	3682.14	1041.57	1468.54	755.235	1457.92	850.795		11190.1	1230.08	2373.04	1133.12		11190.1	5089.86	9826.94	3430.39
RBR1		90.094	84.5205	129.292	73.8437	162.765	40.0385	156.513	147.716	65.0102	155.639	4.06559	1.23778	1	1	115.585	31.6191	164.92	1		98.4203	102.141	129.292	81.9478	214.873	96.4866	178.532	147.716	111.29	172.057	4.06559	3.11056	1	1	118.156	50.7413	164.92	1		120.527	152.399	2.29404	83.7043		120.527	630.598	9.4998	253.405
RBR2		57.094	116.52	50.2919	147.844	156.765	116.039	2.51334	48.716	39.0102	7.63948	1	1	1	1	112.585	52.6191	96.9202	29.3509		62.3705	140.812	50.2919	164.069	206.952	279.635	2.86692	48.716	66.781	8.44534	1	1	1	1	115.089	84.4415	96.9202	69.8798		150.688	31.7023	1	91.5826		150.688	131.178	1	277.255
RBT1		42.094	25.5205	58.2919	32.8437	22.7649	6.03852	1	1	1	1	1	1	1	1	1	1	1	1		45.9842	30.8408	58.2919	36.4482	30.0529	14.5519	1	1	1	1	1	1	1	1	1	1	1	1		36.0283	1	1	1		36.0283	1	1	1
RBT5		6645.09	37538.5	7578.29	39023.8	13588.8	7244.04	3821.51	5693.72	1912.01	6396.64	7180.07	2987.24	5105.23	4699.69	6437.58	7499.62	7173.92	6327.35		7259.22	45364.4	7578.29	43306.6	17939.1	17457	4359.12	5693.72	3273.14	7071.39	7180.07	7506.94	6634.89	9003.43	6580.78	12035.2	7173.92	15064.4		23150.8	5099.34	7581.33	10213.6		23150.8	21100.1	31394.9	30920.4
RCT1		3097.09	9731.52	3670.29	10665.8	3910.76	2104.04	1063.51	1689.72	690.01	1370.64	1498.07	614.238	1080.23	701.688	2473.58	1669.62	2274.92	918.351		3383.32	11760.3	3670.29	11836.4	5162.77	5070.41	1213.13	1689.72	1181.22	1515.22	1498.07	1543.58	1403.89	1344.26	2528.61	2679.35	2274.92	2186.45		6813.91	1399.82	1447.45	2417.33		6813.91	5792.2	5994.01	7318.18
RFG1		576.094	758.52	555.292	782.844	506.765	253.039	293.513	281.716	239.01	190.639	154.066	18.2378	119.23	1	308.585	84.6191	273.92	60.3509		629.335	916.653	555.292	868.758	669.002	609.784	334.805	281.716	409.158	210.749	154.066	45.8316	154.954	1	315.449	135.794	273.92	143.686		708.137	309.107	88.9628	217.212		708.137	1279.03	368.402	657.584
RFX2		277.094	355.52	294.292	413.844	239.765	99.0385	1	100.716	27.0102	46.6395	41.0656	7.23778	39.2295	1	40.5846	34.6191	27.9202	1		302.702	429.638	294.292	459.261	316.524	238.668	1.14068	100.716	46.2384	51.5593	41.0656	18.1886	50.9837	1	41.4873	55.5556	27.9202	1		340.181	49.9136	27.8095	31.4908		340.181	206.533	115.161	95.3346
RHR2		1739.09	752.52	2011.29	852.844	1211.76	544.039	675.513	1192.72	522.01	987.639	347.066	174.238	265.23	176.688	837.585	751.619	811.92	450.351		1899.82	909.402	2011.29	946.44	1599.7	1311.05	770.544	1192.72	893.621	1091.82	347.066	437.86	344.699	338.491	856.216	1206.18	811.92	1072.21		1446.28	987.176	367.029	986.631		1446.28	4084.75	1519.9	2986.91
RIM101		7090.09	4789.52	8296.29	4943.84	7170.76	3828.04	1974.51	1824.72	1456.01	1546.64	2132.07	1451.24	1486.23	1636.69	3376.58	2954.62	3160.92	1549.35		7745.34	5788.02	8296.29	5486.41	9466.44	9224.98	2252.29	1824.72	2492.52	1709.79	2132.07	3646.97	1931.54	3135.49	3451.69	4741.48	3160.92	3688.76		7667.91	2069.83	2711.52	3760.71		7667.91	8564.57	11228.6	11385.1
RNR22		5482.09	3580.52	6264.29	3989.84	4644.76	2301.04	683.513	601.716	594.01	478.639	1436.07	605.238	1132.23	661.688	1121.58	1276.62	1159.92	653.351		5988.74	4326.97	6264.29	4427.71	6131.75	5545.15	779.67	601.716	1016.88	529.129	1436.07	1520.96	1471.48	1267.63	1146.53	2048.68	1159.92	1555.52		5447.44	731.848	1424.03	1477.66		5447.44	3028.25	5897.04	4473.45
ROB1		354.094	395.52	392.292	418.844	293.765	174.039	47.5133	113.716	87.0102	51.6395	64.0656	46.2378	44.2295	4.68842	158.585	67.6191	142.92	1		386.818	477.977	392.292	464.81	387.812	419.406	54.1975	113.716	148.951	57.0867	64.0656	116.196	57.4819	8.98184	162.112	108.513	142.92	1		421.519	93.4879	61.6813	103.636		421.519	386.836	255.427	313.747
RPN4		479.094	351.52	522.292	361.844	512.765	276.039	465.513	511.716	242.01	481.639	252.066	50.2378	157.23	57.6884	295.585	105.619	359.92	90.3509		523.371	424.804	522.292	401.555	676.923	665.21	531.002	511.716	414.294	532.446	252.066	126.248	204.34	110.517	302.16	169.494	359.92	215.111		535.692	497.364	173.292	261.671		535.692	2058	717.618	792.179
RTA3		7.09399	14.5205	21.2919	2.84374	1.76489	1	1	1	1	1	1	1	1	1	1	1	1	1		7.74959	17.5476	21.2919	3.15583	2.32991	2.40985	1	1	1	1	1	1	1	1	1	1	1	1		9.08079	1	1	1		9.08079	1	1	1
SAP1		79.094	75.5205	67.2919	61.8437	52.7649	12.0385	1	1	1	1	1	1	1	1	1	1	1	1		86.4037	91.2646	67.2919	68.6308	69.6572	29.011	1	1	1	1	1	1	1	1	1	1	1	1		68.7099	1	1	1		68.7099	1	1	1
SAP10		8.09399	22.5205	13.2919	25.8437	14.7649	1	1	1	1	1	1	1	1	1	1	1	1	1		8.84201	27.2154	13.2919	28.68	19.4918	2.40985	1	1	1	1	1	1	1	1	1	1	1	1		16.6552	1	1	1		16.6552	1	1	1
SAP2		6.09399	1.52046	4.29192	9.84374	1	1	1	1	1	1	1	1	1	1	1	1	1	1		6.65718	1.83743	4.29192	10.9241	1.32014	2.40985	1	1	1	1	1	1	1	1	1	1	1	1		4.57343	1	1	1		4.57343	1	1	1
SAP4		2636.09	2643.52	2649.29	2853.84	2222.76	562.039	812.513	1174.72	458.01	1021.64	334.066	160.238	238.23	215.688	2754.58	697.619	2828.92	476.351		2879.72	3194.63	2649.29	3167.04	2934.37	1354.43	926.818	1174.72	784.061	1129.41	334.066	402.678	309.609	413.205	2815.86	1119.52	2828.92	1134.11		2696.58	1003.75	364.89	1974.6		2696.58	4153.33	1511.04	5977.87
SAP5		8826.09	13279.5	9586.29	14592.8	8715.76	2864.04	1077.51	3410.72	936.01	2965.64	2335.07	868.238	1916.23	1058.69	1864.58	2287.62	1900.92	1498.35		9641.78	16048	9586.29	16194.3	11506.1	6901.89	1229.1	3410.72	1602.34	3278.47	2335.07	2181.88	2490.38	2028.18	1906.06	3671.1	1900.92	3567.33		11646.4	2380.16	2258.88	2761.35		11646.4	9848.65	9354.21	8359.67
SAP6		2719.09	2945.52	2925.29	3304.84	1271.76	405.039	263.513	973.716	239.01	802.639	294.066	103.238	265.23	104.688	686.585	268.619	662.92	159.351		2970.39	3559.59	2925.29	3667.54	1678.91	976.08	300.584	973.716	409.158	887.306	294.066	259.437	344.699	200.557	701.857	431.072	662.92	379.389		2629.63	642.691	274.69	543.809		2629.63	2659.34	1137.51	1646.32
SAP9		2890.09	3583.52	3193.29	3925.84	3883.76	1905.04	1064.51	1162.72	542.01	1163.64	1134.07	368.238	813.23	595.688	1169.58	550.619	1293.92	478.351		3157.19	4330.6	3193.29	4356.69	5127.13	4590.85	1214.27	1162.72	927.859	1286.39	1134.07	925.383	1056.89	1141.19	1195.6	883.617	1293.92	1138.88		4125.96	1147.81	1064.38	1128		4125.96	4749.42	4407.7	3414.9
SCW11		224.094	85.5205	237.292	121.844	192.765	94.0385	1	45.716	18.0102	13.6395	42.0656	3.23778	31.2295	1	1	1	1	1		244.804	103.349	237.292	135.216	254.477	226.618	1	45.716	30.8314	15.0783	42.0656	8.13656	40.5867	1.91575	1	1	1	1		200.293	23.1564	23.1762	1		200.293	95.817	95.9744	1
SCW4		35.094	73.5205	26.2919	93.8437	123.765	70.0385	15.5133	80.716	58.0102	29.6395	1	1	1	1	54.5846	64.6191	46.9202	1		38.3373	88.8476	26.2919	104.143	163.387	168.782	17.6958	80.716	99.3068	32.766	1	1	1	1	55.7988	103.699	46.9202	1		98.2982	57.6211	1	51.8544		98.2982	238.426	1	156.983
SEF1		311.094	274.52	342.292	308.844	649.765	269.039	63.5133	304.716	95.0102	202.639	100.066	38.2378	86.2295	1	107.585	96.6191	99.9202	32.3509		339.845	331.751	342.292	342.738	857.783	648.341	72.4484	304.716	162.647	224.015	100.066	96.0917	112.066	1	109.978	155.051	99.9202	77.0223		477.125	190.956	77.3059	110.493		477.125	790.143	320.13	334.504
SEF2		143.094	239.52	132.292	248.844	238.765	68.0385	2.51334	145.716	67.0102	72.6395	136.066	23.2378	91.2295	1	100.585	81.6191	96.9202	1		156.318	289.455	132.292	276.153	315.204	163.962	2.86692	145.716	114.714	80.3019	136.066	58.3966	118.564	1	102.822	130.98	96.9202	1		222.231	85.8996	78.5066	82.9305		222.231	355.437	325.103	251.062
SGA1		139.094	112.52	121.292	109.844	194.765	62.0385	1	34.716	13.0102	14.6395	55.0656	4.23778	47.2295	1	1	1	1	1		151.949	135.978	121.292	121.899	257.118	149.503	1	34.716	22.272	16.1837	55.0656	10.6496	61.3807	1	1	1	1	1		156.29	18.5429	32.024	1		156.29	76.7272	132.614	1
SIN3		304.094	302.52	389.292	368.844	218.765	119.039	18.5133	123.716	58.0102	62.6395	53.0656	18.2378	49.2295	1	136.585	63.6191	98.9202	21.3509		332.198	365.588	389.292	409.323	288.801	286.864	21.1178	123.716	99.3068	69.247	53.0656	45.8316	63.98	1	139.623	102.094	98.9202	50.833		345.344	78.3469	40.9693	97.8675		345.344	324.185	169.657	296.282
SIT1		752.094	2431.52	837.292	2660.84	1630.76	723.039	383.513	907.716	297.01	827.639	308.066	175.238	282.23	179.688	479.585	532.619	479.92	300.351		821.601	2938.43	837.292	2952.86	2152.84	1742.41	437.466	907.716	508.447	914.944	308.066	440.373	366.793	344.238	490.253	854.731	479.92	715.087		1907.57	692.143	364.867	634.998		1907.57	2863.96	1510.95	1922.38
SMC2		49.094	83.5205	39.2919	103.844	29.7649	1	1	1	1	1	1	1	1	1	1	1	1	1		53.6311	100.932	39.2919	115.24	39.2939	2.40985	1	1	1	1	1	1	1	1	1	1	1	1		58.4666	1	1	1		58.4666	1	1	1
SOD4		243.094	294.52	241.292	364.844	238.765	117.039	20.5133	99.716	37.0102	18.6395	21.0656	25.2378	8.22954		94.5846	62.6191	84.9202	1		265.56	355.921	241.292	404.884	315.204	282.045	23.3992	99.716	63.3572	20.6057	21.0656	63.4226	10.6953	1	96.6885	100.489	84.9202	2.38084		310.818	51.7695	24.0459	71.1197		310.818	214.213	99.5761	215.306
SOD5		40524.1	50504.5	45886.3	54901.8	31343.8	18527	3130.51	6920.72	2096.01	5949.64	8887.07	3138.24	6356.23	3939.69	6381.58	4890.62	6359.92	3014.35		44269.2	61033.5	45886.3	60927.1	41378.3	44647.3	3570.91	6920.72	3588.13	6577.24	8887.07	7886.4	8260.72	7547.46	6523.54	7848.32	6359.92	7176.69		49690.3	5164.25	8145.41	6977.12		49690.3	21368.7	33730.8	21122.4
SOD6		1058.09	244.52	1220.29	255.844	1130.76	619.039	215.513	198.716	167.01	143.639	302.066	152.238	186.23	130.688	514.585	295.619	459.92	183.351		1155.88	295.497	1220.29	283.922	1492.77	1491.79	245.832	198.716	285.902	158.791	302.066	382.574	242.029	250.366	526.031	474.401	459.92	436.529		990.025	222.31	294.259	474.22		990.025	919.879	1218.55	1435.65
SOG2		115.094	227.52	111.292	217.844	140.765	60.0385	1	15.716	25.0102	1	30.0656	1	18.2295	1	57.5846	34.6191	1	1		125.731	274.953	111.292	241.751	185.83	144.684	1	15.716	42.8146	1	30.0656	1	23.6916	1	58.8655	55.5556	1	1		180.707	15.1326	13.9393	29.1053		180.707	62.6161	57.7238	88.1128
SSB1		1176.09	1355.52	1375.29	1445.84	814.765	331.039	289.513	634.716	245.01	483.639	153.066	162.238	101.23	118.688	583.585	477.619	536.92	243.351		1284.79	1638.11	1375.29	1604.52	1075.61	797.752	330.242	634.716	419.429	534.656	153.066	407.704	131.561	227.377	596.566	766.469	536.92	579.379		1296.01	479.761	229.927	619.834		1296.01	1985.16	952.147	1876.47
STF2		36762.1	10997.5	42001.3	12288.8	25707.8	16907	7357.51	7177.72	5693.01	6565.64	10485.1	4407.24	8715.23	5035.69	12078.6	7307.62	11502.9	4477.35		40159.6	13290.2	42001.3	13637.5	33937.9	40743.4	8392.57	7177.72	9745.78	7258.22	10485.1	11075.4	11326.5	9647.12	12347.3	11727	11502.9	10659.9		30628.3	8143.57	10633.5	11559.3		30628.3	33696.6	44034.4	34994.3
STP2		3321.09	2612.52	3716.29	2880.84	5152.76	2712.04	1320.51	1409.72	982.01	1282.64	1643.07	515.238	1303.23	798.688	1952.58	1315.62	2011.92	782.351		3628.02	3157.17	3716.29	3197	6802.39	6535.59	1506.28	1409.72	1681.09	1417.94	1643.07	1294.79	1693.71	1530.09	1996.02	2111.27	2011.92	1862.65		4506.08	1503.76	1540.41	1995.46		4506.08	6222.27	6378.99	6041.03
SUT1		236.094	196.52	204.292	211.844	236.765	91.0385	48.5133	156.716	83.0102	121.639	109.066	20.2378	81.2295	1	59.5846	40.6191	61.9202	1		257.913	237.49	204.292	235.093	312.564	219.389	55.3382	156.716	142.104	134.471	109.066	50.8576	105.568	1	60.91	65.1842	61.9202	1		244.457	122.157	66.6228	47.2536		244.457	505.464	275.891	143.055
TEC1		10612.1	3236.52	11927.3	3676.84	14003.8	7019.04	1969.51	1960.72	1621.01	1594.64	2126.07	1071.24	1690.23	1168.69	1425.58	1048.62	1299.92	572.351		11592.8	3911.25	11927.3	4080.36	18487	16914.8	2246.58	1960.72	2774.98	1762.85	2126.07	2692.02	2196.67	2238.92	1457.3	1682.79	1299.92	1362.68		11152.3	2186.28	2313.42	1450.67		11152.3	9046.44	9580.06	4391.73
TPK1		109.094	119.52	150.292	150.844	373.765	126.039	189.513	301.716	154.01	287.639	230.066	54.2378	181.23	21.6884	196.585	170.619	231.92	100.351		119.176	144.437	150.292	167.398	493.423	303.733	216.174	301.716	263.648	317.981	230.066	136.3	235.531	41.5496	200.957	273.804	231.92	238.919		229.743	274.88	160.861	236.4		229.743	1137.4	666.141	715.674
TPK2		418.094	249.52	422.292	301.844	187.765	121.039	0.513341	32.716	18.0102	1	56.0656	13.2378	38.2295	1	71.5846	28.6191	69.9202	1		456.733	301.539	422.292	334.97	247.877	291.684	0.585558	32.716	30.8314	1	56.0656	33.2666	49.6841	1	73.1769	45.927	69.9202	1		342.516	16.2832	35.0041	47.506		342.516	67.377	144.955	143.819
TPS2		6723.09	5434.52	7851.29	5929.84	5040.76	2397.04	1185.51	1499.72	983.01	1241.64	2018.07	663.238	1553.23	702.688	1452.58	985.619	1275.92	497.351		7344.43	6567.48	7851.29	6580.62	6654.53	5776.49	1352.29	1499.72	1682.8	1372.61	2018.07	1666.72	2018.62	1346.18	1484.9	1581.69	1275.92	1184.11		6795.81	1476.86	1762.39	1381.66		6795.81	6110.95	7298.22	4182.8
TRR1		440.094	656.52	578.292	732.844	538.765	154.039	51.5133	333.716	80.0102	229.639	92.0656	42.2378	63.2295	1	129.585	91.6191	121.92	48.3509		480.766	793.389	578.292	813.27	711.247	371.209	58.7602	333.716	136.968	253.863	92.0656	106.144	82.1748	1	132.467	147.028	121.92	115.116		624.696	195.827	70.346	129.133		624.696	810.295	291.309	390.934
TRX1		1046.09	1093.52	987.292	1272.84	1023.76	445.039	370.513	632.716	174.01	604.639	203.066	40.2378	158.23	60.6884	360.585	154.619	412.92	105.351		1142.77	1321.49	987.292	1412.53	1351.52	1072.47	422.637	632.716	297.885	668.42	203.066	101.118	205.639	116.264	368.605	248.128	412.92	250.824		1214.68	505.415	156.522	320.119		1214.68	2091.31	648.169	969.123
TTR1		755.094	550.52	813.292	640.844	361.765	176.039	19.5133	120.716	66.0102	108.639	39.0656	21.2378	25.2295	1.68842	166.585	108.619	174.92	54.3509		824.878	665.29	813.292	711.174	477.581	424.226	22.2585	120.716	113.002	120.099	39.0656	53.3706	32.789	3.23459	170.29	174.309	174.92	129.401		652.74	94.0189	32.1149	162.23		652.74	389.033	132.991	491.132
TUP1		579.094	696.52	611.292	690.844	402.765	194.039	156.513	140.716	128.01	118.639	93.0656	43.2378	44.2295	37.6884	347.585	258.619	370.92	132.351		632.612	841.728	611.292	766.661	531.707	467.603	178.532	140.716	219.139	131.154	93.0656	108.657	57.4819	72.2016	355.316	415.024	370.92	315.106		641.934	167.385	82.8514	364.092		641.934	692.609	343.095	1102.24
TYE7		9360.09	4005.52	9856.29	4366.84	7906.76	3827.04	2361.51	2318.72	1705.01	2071.64	2107.07	670.238	1639.23	896.688	2832.58	1754.62	2791.92	1123.35		10225.1	4840.57	9856.29	4846.09	10438.1	9222.57	2693.73	2318.72	2918.78	2290.17	2107.07	1684.31	2130.39	1717.83	2895.59	2815.76	2791.92	2674.52		8238.12	2555.35	1909.9	2794.45		8238.12	10573.6	7909.05	8459.86
UCF1		56702.1	52377.5	61026.3	56435.8	70298.8	38733	18542.5	19833.7	13814	16842.6	29717.1	12126.2	24101.2	14772.7	28767.6	18639.6	28006.9	11474.4		61942.4	63296.9	61026.3	62629.4	92804.4	93340.6	21151.1	19833.7	23648	18619.3	29717.1	30473.3	31322.6	28300.8	29407.5	29912.3	28006.9	27318.6		72506.7	20813	29953.4	28661.3		72506.7	86120.4	124040	86768.8
UGA32		42.094	111.52	37.2919	131.844	61.7649	25.0385	1	1	1	1	1	1	1	1	1	1	1	1		45.9842	134.77	37.2919	146.313	81.5385	60.339	1	1	1	1	1	1	1	1	1	1	1	1		84.3727	1	1	1		84.3727	1	1	1
UGP1		1717.09	1133.52	1891.29	1202.84	1217.76	497.039	233.513	379.716	224.01	286.639	276.066	163.238	219.23	136.688	473.585	290.619	456.92	157.351		1875.78	1369.83	1891.29	1334.85	1607.62	1197.79	266.364	379.716	383.48	316.876	276.066	410.217	284.916	261.861	484.119	466.377	456.92	374.627		1546.19	336.609	308.265	445.511		1546.19	1392.83	1276.55	1348.73
UME6		470.094	385.52	429.292	397.844	500.765	213.039	115.513	140.716	55.0102	193.639	74.0656	5.23778	42.2295	1	63.5846	19.6191	59.9202	1		513.539	465.892	429.292	441.505	661.081	513.39	131.764	140.716	94.1712	214.066	74.0656	13.1626	54.8826	1.91575	64.999	31.4841	59.9202	1		504.117	145.179	36.0066	39.3508		504.117	600.724	149.107	119.13
UPC2		247.094	470.52	283.292	507.844	771.765	313.039	110.513	210.716	77.0102	155.639	269.066	31.2378	157.23	35.6884	118.585	72.6191	128.92	33.3509		269.93	568.612	283.292	563.578	1018.84	754.374	126.06	210.716	131.833	172.057	269.066	78.5007	204.34	68.3701	121.222	116.537	128.92	79.4031		576.438	160.167	155.069	111.521		576.438	662.739	642.154	337.615
WH11		83155.1	10182.5	89730.3	10881.8	10146.8	17370	4600.51	2061.72	3153.01	1829.64	1200.07	1989.24	999.23	2607.69	15179.6	5930.62	15279.9	3937.35		90840.1	12305.3	89730.3	12076.1	13395.2	41859.1	5247.71	2061.72	5397.59	2022.64	1200.07	4998.96	1298.62	4995.68	15517.2	9517.28	15279.9	9374.2		43367.7	3682.41	3123.33	12422.2		43367.7	15237.1	12934	37606.6
YHB1		13174.1	5644.52	14172.3	6081.84	17031.8	5851.04	3055.51	2324.72	2197.01	2105.64	4125.07	1576.24	3378.23	1877.69	4554.58	2530.62	4620.92	1637.35		14391.6	6821.26	14172.3	6749.3	22484.4	14100.1	3485.36	2324.72	3761.03	2327.75	4125.07	3961.09	4390.44	3597.18	4655.9	4061.06	4620.92	3898.27		13119.8	2974.72	4018.44	4309.04		13119.8	12308.8	16640.7	13045.1
YWP1		2396.09	214.52	2646.29	257.844	385.765	314.039	104.513	102.716	98.0102	1	58.0656	23.2378	38.2295	1	101.585	54.6191	69.9202	1		2617.54	259.243	2646.29	286.141	509.265	756.784	119.216	102.716	167.782	1	58.0656	58.3966	49.6841	1	103.844	87.651	69.9202	1		1179.21	97.6786	41.7866	65.6039		1179.21	404.176	173.042	198.608
ZAP1		203.094	791.52	233.292	928.844	204.765	58.0385	8.51334	85.716	32.0102	29.6395	71.0656	8.23778	52.2295	1	56.5846	31.6191	62.9202	1		221.863	956.533	233.292	1030.78	270.319	139.864	9.711	85.716	54.7978	32.766	71.0656	20.7016	67.8789	1	57.8433	50.7413	62.9202	1		475.442	45.7477	40.1615	43.1262		475.442	189.296	166.312	130.559
ZCF20		214.094	442.52	209.292	496.844	214.765	90.0385	1	92.716	24.0102	42.6395	48.0656	1.23778	19.2295	1	57.5846	62.6191	42.9202	1		233.88	534.775	209.292	551.37	283.52	216.979	1	92.716	41.1027	47.1373	48.0656	3.11056	24.9912	1	58.8655	100.489	42.9202	1		338.303	45.489	19.2918	50.8187		338.303	188.225	79.8891	153.848
ZCF3		150.094	114.52	149.292	118.844	182.765	84.0385	4.51334	125.716	62.0102	99.6395	21.0656	18.2378	11.2295	1	98.5846	64.6191	52.9202	1		163.965	138.395	149.292	131.886	241.276	202.52	5.14828	125.716	106.154	110.15	21.0656	45.8316	14.5942	1	100.778	103.699	52.9202	1		171.222	86.7922	20.6229	64.5991		171.222	359.13	85.401	195.566
ZCF31		81.094	206.52	94.2919	233.844	126.765	64.0385	1	1	1	1	1	1	1	1	1	1	1	1		88.5885	249.575	94.2919	259.507	167.348	154.323	1	1	1	1	1	1	1	1	1	1	1	1		168.939	1	1	1		168.939	1	1	1
ZCF34		40.094	67.5205	33.2919	80.8437	28.7649	1	1	1	1	1	1	1	1	1	1	1	1	1		43.7994	81.5968	33.2919	89.716	37.9738	2.40985	1	1	1	1	1	1	1	1	1	1	1	1		48.1313	1	1	1		48.1313	1	1	1
ZCF39		560.094	683.52	621.292	728.844	807.765	396.039	94.5133	172.716	84.0102	76.6395	164.066	76.2378	114.23	98.6884	223.585	119.619	195.92	51.3509		611.857	826.017	621.292	808.831	1066.37	954.392	107.809	172.716	143.816	84.7238	164.066	191.586	148.456	189.062	228.558	191.961	195.92	122.258		814.792	127.266	173.292	184.674		814.792	526.604	717.618	559.08
ZCF7		10.094	19.5205	2.29192	19.8437	5.76489	1	1	1	1	1	1	1	1	1	1	1	1	1		11.0268	23.59	2.29192	22.0215	7.61048	2.40985	1	1	1	1	1	1	1	1	1	1	1	1		11.4918	1	1	1		11.4918	1	1	1
ZRT1		1367.09	18363.5	1464.29	20479.8	1250.76	910.039	219.513	1021.72	221.01	822.639	2422.07	599.238	1997.23	627.688	1428.58	663.619	1342.92	383.351		1493.44	22191.9	1464.29	22727.4	1651.19	2193.05	250.394	1021.72	378.344	909.416	2422.07	1505.89	2595.65	1202.49	1460.36	1064.96	1342.92	912.697		8620.21	639.968	1931.52	1195.23		8620.21	2648.07	7998.61	3618.43
ZRT2		3436.09	14009.5	3815.29	15876.8	1877.76	901.039	569.513	1247.72	464.01	1108.64	3102.07	400.238	2403.23	426.688	1619.58	700.619	1544.92	439.351		3753.65	16930.2	3815.29	17619.3	2478.92	2171.36	649.632	1247.72	794.332	1225.58	3102.07	1005.8	3123.3	817.429	1655.61	1124.33	1544.92	1046.02		7794.77	979.316	2012.15	1342.72		7794.77	4052.23	8332.48	4064.93
orf19.1424		85.094	175.52	113.292	209.844	78.7649	30.0385	1	22.716	4.01023	1	5.06559	1	1.22954	1	60.5846	19.6191	1	1		92.9582	212.112	113.292	232.873	103.981	72.3882	1	22.716	6.86505	1	5.06559	1	1.59794	1	61.9322	31.4841	1	1		137.934	7.89526	2.16588	23.8541		137.934	32.6691	8.96911	72.2154
orf19.1534		730.094	3166.52	744.292	3451.84	887.765	370.039	424.513	568.716	215.01	589.639	1060.07	124.238	803.23	292.688	758.585	298.619	860.92	262.351		797.568	3826.66	744.292	3830.67	1171.98	891.736	484.234	568.716	368.073	651.838	1060.07	312.21	1043.9	560.718	775.459	479.215	860.92	624.615		1877.15	518.215	744.223	685.052		1877.15	2144.28	3081.89	2073.91
orf19.1691		65.094	138.52	41.2919	165.844	51.7649	1	1	1	1	1	40.0656	1	7.22954	1	1	1	1	1		71.1098	167.399	41.2919	184.044	68.3371	2.40985	1	1	1	1	40.0656	1	9.3957	1	1	1	1	1		89.0986	1	12.8653	1		89.0986	1	53.2764	1
orf19.1862		1561.09	1370.52	1832.29	1435.84	828.765	765.039	283.513	198.716	252.01	134.639	225.066	124.238	216.23	106.688	905.585	322.619	797.92	166.351		1705.37	1656.24	1832.29	1593.42	1094.09	1843.62	323.398	198.716	431.412	148.842	225.066	312.21	281.018	204.388	925.729	517.729	797.92	396.055		1620.84	275.592	255.67	659.358		1620.84	1140.35	1058.75	1996.13
orf19.2125		2647.09	4152.52	2939.29	4546.84	2619.76	1426.04	792.513	934.716	561.01	804.639	1124.07	356.238	863.23	470.688	1627.58	849.619	1566.92	584.351		2891.73	5018.22	2939.29	5045.84	3458.46	3436.53	904.004	934.716	960.385	889.517	1124.07	895.227	1121.88	901.722	1663.79	1363.44	1566.92	1391.25		3798.35	922.156	1010.72	1496.35		3798.35	3815.71	4185.49	4530.02
orf19.3615		394.094	556.52	447.292	629.844	513.765	261.039	1	194.716	67.0102	130.639	241.066	52.2378	193.23	4.68842	79.5846	55.6191	81.9202	1		430.515	672.541	447.292	698.967	678.243	629.063	1	194.716	114.714	144.42	241.066	131.274	251.126	8.98184	81.3549	89.2558	81.9202	1		592.77	113.712	158.112	63.3827		592.77	470.521	654.754	191.884
orf19.409		5497.09	3150.52	5863.29	3411.84	5348.76	2837.04	2608.51	2336.72	1475.01	2135.64	1136.07	433.238	904.23	658.688	2192.58	1229.62	2513.92	1006.35		6005.12	3807.33	5863.29	3786.28	7061.13	6836.82	2975.48	2336.72	2525.05	2360.92	1136.07	1088.73	1175.16	1261.88	2241.36	1973.26	2513.92	2395.96		5560	2549.54	1165.46	2281.12		5560	10549.5	4826.27	6905.83
orf19.411		319.094	403.52	374.292	451.844	572.765	230.039	1	65.716	73.0102	1	135.066	119.238	117.23	92.6884	151.585	235.619	130.92	155.351		348.584	487.644	374.292	501.432	756.132	554.357	1	65.716	124.985	1	135.066	299.645	152.355	177.568	154.956	378.114	130.92	369.866		503.74	48.1753	191.158	258.464		503.74	199.34	791.603	782.469
orf19.4174		165.094	289.52	190.292	302.844	321.765	128.039	1	12.716	15.0102	1	64.0656	12.2378	38.2295	18.6884	51.5846	48.6191	1	30.3509		180.352	349.878	190.292	336.08	424.776	308.553	1	12.716	25.6958	1	64.0656	30.7536	49.6841	35.8024	52.732	78.0224	1	72.2606		298.322	10.1029	45.0764	51.0038		298.322	41.8041	186.665	154.408
orf19.449		6892.09	4189.52	8012.29	4451.84	6776.76	3306.04	1214.51	1596.72	1124.01	1217.64	2510.07	1359.24	2030.23	1419.69	2500.58	2399.62	2320.92	1124.35		7529.04	5062.93	8012.29	4940.42	8946.3	7967.04	1385.37	1596.72	1924.18	1346.08	2510.07	3415.77	2638.54	2719.77	2556.21	3850.84	2320.92	2676.9		7076.34	1563.09	2821.04	2851.22		7076.34	6467.76	11682.1	8631.72
orf19.4706		574.094	1127.52	606.292	1232.84	846.765	348.039	125.513	285.716	140.01	194.639	211.066	108.238	171.23	59.6884	326.585	182.619	310.92	78.3509		627.15	1362.58	606.292	1368.14	1117.85	838.719	143.171	285.716	239.681	215.171	211.066	272.002	222.534	114.348	333.849	293.062	310.92	186.541		986.789	220.935	204.988	281.093		986.789	914.187	848.871	850.975
orf19.5517		149.094	20.5205	138.292	46.8437	78.7649	20.0385	1	12.716	20.0102	1	1	1	1	1	115.585	84.6191	110.92	28.3509		162.873	24.7985	138.292	51.9847	103.981	48.2897	1	12.716	34.2552	1	1	1	1	1	118.156	135.794	110.92	67.4989		88.3698	12.2428	1	108.092		88.3698	50.6584	1	327.236
orf19.5626		5825.09	1096.52	6024.29	1207.84	3689.76	2371.04	951.513	903.716	478.01	909.639	1548.07	438.238	1151.23	707.688	1448.58	586.619	1514.92	386.351		6363.44	1325.12	6024.29	1340.4	4871.02	5713.84	1085.37	903.716	818.298	1005.59	1548.07	1101.29	1496.17	1355.75	1480.81	941.389	1514.92	919.839		4273.02	953.245	1375.32	1214.24		4273.02	3944.35	5695.32	3675.96
orf19.5848		124.094	211.52	138.292	247.844	234.765	115.039	1	107.716	72.0102	1	108.066	54.2378	79.2295	18.6884	137.585	155.619	163.92	81.3509		135.562	255.617	138.292	275.044	309.923	277.225	1	107.716	123.273	1	108.066	136.3	102.969	35.8024	140.645	249.733	163.92	193.683		231.944	58.2473	95.7841	186.995		231.944	241.017	396.65	566.106
orf19.6578		2718.09	1731.52	3036.29	1974.84	3716.76	2029.04	1372.51	1409.72	951.01	1276.64	1674.07	743.238	1408.23	1027.69	1733.58	1276.62	1807.92	823.351		2969.29	2092.5	3036.29	2191.57	4906.66	4889.67	1565.6	1409.72	1628.02	1411.31	1674.07	1867.76	1830.17	1968.79	1772.15	2048.68	1807.92	1960.27		3347.67	1503.66	1835.2	1897.25		3347.67	6221.87	7599.71	5743.71
orf19.6660		352.094	178.52	386.292	175.844	248.765	73.0385	1	55.716	53.0102	1	26.0656	19.2378	8.22954	1	168.585	113.619	117.92	73.3509		384.634	215.738	386.292	195.142	328.405	176.012	1	55.716	90.7474	1	26.0656	48.3446	10.6953	1	172.335	182.332	117.92	174.637		281.037	37.1158	21.5264	161.806		281.037	153.578	89.1426	489.848
orf19.670.2		20156.1	19107.5	22848.3	21019.8	18914.8	12845	6677.51	6643.72	5636.01	5512.64	3833.07	2869.24	3024.23	3080.69	9468.58	7465.62	8631.92	3440.35		22018.9	23091	22848.3	23326.7	24970.2	30954.6	7616.9	6643.72	9648.2	6094.14	3833.07	7210.4	3930.37	5901.83	9679.2	11980.6	8631.92	8190.92		24534.9	7500.74	5218.92	9620.66		24534.9	31036.7	21612	29125.4
ARP3		114.094	273.52	130.292	316.844	106.765	47.0385	1	30.716	19.0102	1	6.06559	11.2378	1.22954	1	90.5846	64.6191	100.92	25.3509		124.638	330.543	130.292	351.616	140.945	113.356	1	30.716	32.5433	1	6.06559	28.2406	1.59794	1	92.5996	103.699	100.92	60.3564		198.565	16.3148	9.22603	89.3937		198.565	67.5077	38.2058	270.629
CLN3		810.094	1304.52	860.292	1421.84	1048.76	564.039	509.513	551.716	313.01	472.639	244.066	69.2378	243.23	131.688	628.585	346.619	667.92	264.351		884.961	1576.48	860.292	1577.89	1384.52	1359.25	581.192	551.716	535.837	522.496	244.066	173.995	316.107	252.282	642.567	556.244	667.92	629.377		1273.9	547.81	246.613	624.027		1273.9	2266.74	1021.24	1889.17
CMK2		183.094	504.52	189.292	557.844	149.765	86.0385	1	26.716	24.0102	1	15.0656	1	8.22954	1	97.5846	41.6191	54.9202	1		200.015	609.7	189.292	619.065	197.711	207.34	1	26.716	41.1027	1	15.0656	1	10.6953	1	99.7553	66.789	54.9202	1		337.187	17.4547	6.94023	55.6161		337.187	72.2242	28.7401	168.371
YRA1		271.094	579.52	296.292	518.844	287.765	98.0385	170.513	226.716	173.01	146.639	86.0656	40.2378	39.2295	15.6884	345.585	280.619	280.92	136.351		296.148	700.336	296.292	575.785	379.891	236.258	194.501	226.716	296.174	162.108	86.0656	101.118	50.9837	30.0551	353.272	450.329	280.92	324.63		414.118	219.875	67.0555	352.288		414.118	909.8	277.683	1066.51
orf19.3456		1.09399	39.5205	9.29192	22.8437	6.76489	1	1	1	1	1	1	1	1	1	1	1	1	1		1.19509	47.7595	9.29192	25.3508	8.93063	2.40985	1	1	1	1	1	1	1	1	1	1	1	1		15.823	1	1	1		15.823	1	1	1
Sum		832537	752583	909478	819537	688924	377401	192695	219804	128399	198830	219655	87407.4	169014	114657	293902	187217	300440	126191																				Sum	909477	219797	219623	300417
NF		1.09242	1.20848	1	1.10975	1.32014	2.40985	1.14068	1	1.71188	1.10549	1	2.513	1.29963	1.91575	1.02224	1.60477	1	2.38084																				NF_WT	1	4.13781	4.14108	3.02738
[truncated: 10 more columns]
