# Supplementary material for: Intravital imaging-based genetic screen reveals the transcriptional network governing Candida albicans filamentation during mammalian infection
Source: eLife. 2023 Feb 27;12:e85114. doi: 10.7554/eLife.85114 (PMC9995110; doi:10.7554/eLife.85114)
Supplement: Supplementary file 5. — The gene names; raw nCounter counts for wild type (WT) and the mutant strains; normalized counts; average counts for the strains; counts normalized to WT; fold-change for the gene expression in the mutant relative to WT; the p value calculated using Student’s t test; and the false discovery rate (FDR) calculated using the Benjamini-Yekutieli procedure are provided. Red indicates a gene downregulated by twofold relative to WT with FDR ≤0.1; green indicates a gene upregulated using the same criteria. [file elife-85114-supp5.xlsx]

## Sheet: Sheet1
Probe Name	Counts after background subtractions																Normalize counts WT						Normalize count - hms1			Normalize count - lys14			Normalize count - ume6				Avg_Individual replicates					Normalize_WT Avg					Probe name	hms1ΔΔ/WT			lys14ΔΔ/WT
	WT_E1	WT_E2	WT_E3	WT_E4	WT_E5	WT_E6	hms1ΔΔ	hms1ΔΔ	hms1ΔΔ	lys14ΔΔ	lys14ΔΔ	lys14ΔΔ	ume6ΔΔ	ume6ΔΔ	ume6ΔΔ		WT_E1	WT_E2	WT_E3	WT_E4	WT_E5	WT_E6	hms1ΔΔ	hms1ΔΔ	hms1ΔΔ	lys14ΔΔ	lys14ΔΔ	lys14ΔΔ	ume6ΔΔ	ume6ΔΔ	ume6ΔΔ		Avg_WT	Avg_hms1ΔΔ	Avg_lys14ΔΔ	Avg_ume6ΔΔ		WT	hms1ΔΔ	lys14ΔΔ	ume6ΔΔ			FC	T-test	FDR	FC	T-test	FDR
ACE2	171.094	146.52	201.292	167.844	191.765	106.039	9.00043	113.531	158.854	717.266	141.188	165.687	7.83962	22.834	29.5107		186.906	177.066	201.292	186.264	253.157	255.536	38.9335	143.366	158.854	717.266	528.836	431.367	24.1022	22.834	38.4386		210.037	113.718	559.157	28.4582		210.037	418.999	872.024	59.5374		ACE2	1.99488	0.0207417	0.0238917	4.15176	0.000578644	0.0112185
ACS1	1412.09	2601.52	1574.29	2954.84	1594.76	1414.04	455	1493.53	1925.85	1599.27	605.188	771.687	554.84	2453.83	1902.51		1542.6	3143.87	1574.29	3279.13	2105.32	3407.61	1968.21	1886.02	1925.85	1599.27	2266.8	2009.1	1705.8	2453.83	2478.08		2508.8	1926.7	1958.39	2212.57		2508.8	7099	3054.17	4628.92		ACS1	2.82964	0.299419	0.155806	1.21738	0.337446	0.351261
ACS2	723.094	1369.52	731.292	1497.84	612.765	280.039	140	339.531	278.854	335.266	79.1879	160.687	146.84	786.834	425.511		789.921	1655.03	731.292	1662.23	808.937	674.85	605.606	428.758	278.854	335.266	296.608	418.35	451.445	786.834	554.24		1053.71	437.739	350.075	597.506		1053.71	1612.87	545.954	1250.04		ACS2	1.53066	0.0698688	0.0501785	0.518125	0.0415051	0.0932964
ADH5	24870.1	12890.5	27998.3	14068.8	20733.8	14121	1159	4159.53	8106.85	19396.3	4971.19	8302.69	3854.84	11438.8	10301.5		27168.5	15577.9	27998.3	15612.8	27371.5	34029.5	5013.54	5252.63	8106.85	19396.3	18620.2	21616.1	11851.3	11438.8	13418		24626.4	6124.34	19877.5	12236.1		24626.4	22565.4	30999.7	25599.1		ADH5	0.916308	0.00447955	0.0082824	1.2588	0.324938	0.342843
AHR1	2491.09	1344.52	2530.29	1423.84	2911.76	1402.04	193	833.531	1481.85	5688.27	1121.19	1523.69	542.84	1168.83	1399.51		2721.31	1624.82	2530.29	1580.1	3843.95	3378.7	834.87	1052.58	1481.85	5688.27	4199.54	3966.94	1668.91	1168.83	1822.9		2613.2	1123.1	4618.25	1553.55		2613.2	4138.11	7202.32	3250.18		AHR1	1.58355	0.0322805	0.0311824	2.75613	0.0176525	0.0661418
ALS1	4263.09	2930.52	4923.29	3157.84	5836.76	3520.04	678	3145.53	2895.85	7952.27	2102.19	2590.69	2054.84	5782.83	4912.51		4657.08	3541.46	4923.29	3504.4	7705.36	8482.75	2932.86	3972.16	2895.85	7952.27	7873.99	6744.88	6317.42	5782.83	6398.69		5469.06	3266.96	7523.71	6166.31		5469.06	12037.2	11733.5	12900.5		ALS1	2.20097	0.13203	0.0802334	2.14543	0.157008	0.213614
ALS2	42.094	46.5205	41.2919	62.8437	30.7649	4.03852	1	3.53102	10.8539	1	1	1	1	1	1		45.9842	56.2188	41.2919	69.7406	40.6141	9.73221	1	4.45894	10.8539	1	1	1	1	1	1		43.9303	5.43762	1	1		43.9303	20.0351	1	1		ALS2	0.456067	0.015617	0.0199576	0.0227633	0.00892987	0.0472074
ALS3	10774.1	10238.5	10950.3	11292.8	8766.76	3759.04	855	2800.53	2427.85	7441.27	2034.19	2525.69	1403.84	5759.83	3097.51		11769.8	12373	10950.3	12532.2	11573.4	9058.7	3698.51	3536.49	2427.85	7441.27	7619.29	6575.65	4315.98	5759.83	4034.6		11376.2	3220.95	7212.07	4703.47		11376.2	11867.7	11247.5	9840.12		ALS3	1.04321	1.93537e-05	0.000420459	0.988682	0.00114479	0.0177556
ALS4	4614.09	648.52	4714.29	781.844	978.765	1001.04	369	598.531	1471.85	2338.27	493.188	723.687	435.84	1554.83	866.511		5040.52	783.721	4714.29	867.648	1292.11	2412.35	1596.2	755.821	1471.85	2338.27	1847.29	1884.13	1339.95	1554.83	1128.66		2518.44	1274.63	2023.23	1341.15		2518.44	4696.41	3155.3	2805.81		ALS4	1.86481	0.319237	0.165129	1.25288	0.680231	0.618988
ALS5	105.094	35.5205	114.292	21.8437	114.765	27.0385	1	9.53102	35.8539	84.2663	1	14.6868	7.83962	39.834	43.5107		114.807	42.9256	114.292	24.241	151.506	65.1587	1	12.0357	35.8539	84.2663	1	38.2373	24.1022	39.834	56.674		85.4883	16.2965	41.1679	40.2034		85.4883	60.0453	64.2027	84.1094		ALS5	0.702381	0.054904	0.0429645	0.751012	0.224636	0.278728
ALS6	1	1	1	1	1	1	1	1	1	1	1	1	1	1	1		1	1	1	1	1	1	1	1	1	1	1	1	1	1	1		1	1	1	1		1	1	1	1		ALS6	1	1	0.462234	1	1	0.825
ALS7	758.094	512.52	810.292	548.844	1489.76	922.039	30.0004	138.531	294.854	936.266	226.188	481.687	83.8396	258.834	167.511		828.155	619.368	810.292	609.077	1966.7	2221.97	129.774	174.936	294.854	936.266	847.213	1254.08	257.757	258.834	218.188		1175.93	199.855	1012.52	244.926		1175.93	736.374	1579.06	512.41		ALS7	0.626207	0.0586437	0.0439322	1.34282	0.720669	0.642389
ALS9	56.094	76.5205	82.2919	86.8437	52.7649	6.03852	1	1	1	1	1	1	1	1	1		61.2781	92.4731	82.2919	96.3745	69.6572	14.5519	1	1	1	1	1	1	1	1	1		69.4378	1	1	1		69.4378	3.68454	1.55953	2.0921		ALS9	0.0530625	0.00656738	0.0105686	0.0224595	0.00656738	0.0363786
AOX2	4342.09	2849.52	4840.29	3008.84	3898.76	1830.04	18.0004	551.531	743.854	1395.27	306.188	368.687	816.84	2174.83	1351.51		4743.38	3443.57	4840.29	3339.05	5146.93	4410.11	77.8652	696.47	743.854	1395.27	1146.86	959.88	2511.3	2174.83	1760.38		4320.56	506.063	1167.34	2148.84		4320.56	1864.61	1820.5	4495.58		AOX2	0.431568	8.80329e-05	0.000809679	0.421358	0.000242267	0.0062626
ARG1	140.094	142.52	139.292	170.844	93.7649	31.0385	1	51.531	44.8539	90.2663	1	29.6868	13.8396	177.834	54.5107		153.041	172.232	139.292	189.593	123.783	74.798	1	65.073	44.8539	90.2663	1	77.2899	42.5486	177.834	71.0018		142.123	36.9757	56.1854	97.1281		142.123	136.238	87.6231	203.202		ARG1	0.958593	0.00608299	0.00997381	0.616529	0.0250024	0.0793299
ARG81	135.094	167.52	142.292	175.844	316.765	112.039	1	45.531	60.8539	166.266	45.1879	64.6868	16.8396	120.834	74.5107		147.579	202.444	142.292	195.142	418.175	269.996	1	57.4963	60.8539	166.266	169.257	168.413	51.7719	120.834	97.0524		229.271	39.7834	167.979	89.8861		229.271	146.584	261.968	188.05		ARG81	0.639346	0.0198477	0.0238281	1.14261	0.354345	0.363967
BCR1	778.094	557.52	929.292	566.844	1228.76	648.039	78.0004	457.531	467.854	1683.27	410.188	604.687	244.84	607.834	571.511		850.004	673.75	929.292	629.053	1622.15	1561.67	337.41	577.767	467.854	1683.27	1536.41	1574.31	752.737	607.834	744.409		1044.32	461.01	1597.99	701.66		1044.32	1698.61	2492.13	1467.94		BCR1	1.62653	0.0644736	0.0475764	2.38637	0.073957	0.138202
BRG1	3437.09	1575.52	4080.29	1761.84	4078.76	2210.04	323	1268.53	1806.85	5126.27	1277.19	1890.69	980.84	1941.83	2154.51		3754.74	1903.98	4080.29	1955.2	5384.55	5325.85	1397.22	1601.89	1806.85	5126.27	4783.86	4922.42	3015.5	1941.83	2806.31		3734.1	1601.99	4944.18	2587.88		3734.1	5902.6	7710.62	5414.1		BRG1	1.58073	0.0545646	0.0429645	2.06492	0.231639	0.282734
CAP1	1603.09	1206.52	1642.29	1321.84	1829.76	928.039	135	732.531	760.854	2194.27	491.188	609.687	312.84	995.834	910.511		1751.25	1458.05	1642.29	1466.91	2415.55	2236.43	583.977	925.036	760.854	2194.27	1839.8	1587.33	961.797	995.834	1185.97		1828.41	756.622	1873.8	1047.87		1828.41	2787.81	2922.25	2192.24		CAP1	1.52471	0.00365442	0.00738532	1.59825	0.870318	0.741683
CAT1	2842.09	1639.52	2983.29	1719.84	907.765	788.039	391	1009.53	1403.85	792.266	366.188	388.687	303.84	1262.83	681.511		3104.75	1981.32	2983.29	1908.59	1198.38	1899.05	1691.37	1274.83	1403.85	792.266	1371.6	1011.95	934.127	1262.83	887.687		2179.23	1456.68	1058.61	1028.22		2179.23	5367.22	1650.93	2151.13		CAT1	2.46289	0.146876	0.0863627	0.757576	0.0413704	0.0932964
CDC10	337.094	691.52	382.292	773.844	224.765	99.0385	62.0004	151.531	117.854	220.266	29.1879	53.6868	1	1	1		368.247	835.685	382.292	858.77	296.722	238.668	268.198	191.352	117.854	220.266	109.327	139.774	1	1	1		496.731	192.468	156.456	1		496.731	709.157	243.998	1	1	CDC10	1.42765	0.112403	0.071822	0.491208	0.0804696	0.14209
CDR1	1427.09	1467.52	1524.29	1710.84	1858.76	741.039	173	1080.53	874.854	2448.27	525.188	577.687	291.84	947.834	669.511		1558.98	1773.46	1524.29	1898.6	2453.84	1785.79	748.355	1364.49	874.854	2448.27	1967.15	1504.01	897.234	947.834	872.057		1832.49	995.899	1973.14	905.708		1832.49	3669.43	3077.19	1894.83		CDR1	2.00243	0.00934901	0.01377	1.67923	0.616984	0.571777
CDR2	21.094	25.5205	15.2919	28.8437	1	1	1	1	1	1	1	1	1	1	1		23.0434	30.8408	15.2919	32.0092	1.32014	2.40985	1	1	1	1	1	1	1	1	1		17.4859	1	1	1		17.4859	1	1	1		CDR2	0.0571889	0.0806187	0.0556013	0.0571889	0.0806187	0.14209
CHT2	111.094	1230.52	111.292	1301.84	118.765	92.0385	9.00043	79.531	106.854	227.266	70.1879	29.6868	1	1	1		121.361	1487.05	111.292	1444.72	156.787	221.799	38.9335	100.431	106.854	227.266	262.897	77.2899	1	1	1		590.501	82.0729	189.151	1		590.501	302.401	294.988	2.0921		CHT2	0.51211	0.250904	0.135426	0.499555	0.357663	0.364957
CHT3	298.094	186.52	318.292	190.844	254.765	151.039	1.00043	50.531	63.8539	190.266	41.1879	89.6868	113.84	384.834	323.511		325.643	225.405	318.292	211.788	336.326	363.98	1	63.8102	63.8539	190.266	154.274	233.501	349.989	384.834	421.382		296.906	42.8881	192.68	385.402		296.906	158.023	300.492	806.298		CHT3	0.532233	0.000381177	0.00207027	1.01208	0.036452	0.0926837
CIT1	2130.09	2954.52	2228.29	3167.84	2202.76	1362.04	567	2241.53	1939.85	1716.27	697.188	855.687	857.84	3240.83	2228.51		2326.95	3570.46	2228.29	3515.5	2907.96	3282.3	2452.7	2830.59	1939.85	1716.27	2611.4	2227.79	2637.35	3240.83	2902.7		2971.91	2407.71	2185.15	2926.96		2971.91	8871.33	3407.82	6123.49		CIT1	2.98506	0.190641	0.10552	1.14668	0.0832878	0.145145
CPH1	121.094	124.52	136.292	159.844	71.7649	15.0385	11.0004	31.531	51.8539	70.2663	1	15.6868	14.8396	28.834	14.5107		132.285	150.48	136.292	177.386	94.7399	36.2405	47.585	39.8172	51.8539	70.2663	1	40.8408	45.623	28.834	18.9006		121.237	46.4187	37.369	31.1192		121.237	171.032	58.2783	65.1044		CPH1	1.41072	0.0399097	0.0353893	0.480696	0.0360379	0.0926837
CPH2	1306.09	1103.52	1407.29	1350.84	1844.76	872.039	146	789.531	1337.85	3429.27	951.188	1349.69	500.84	1618.83	1322.51		1426.8	1333.58	1407.29	1499.09	2435.35	2101.48	631.56	997.015	1337.85	3429.27	3562.79	3513.92	1539.79	1618.83	1722.61		1700.6	988.81	3501.99	1627.08		1700.6	3643.31	5461.48	3404		CPH2	2.14237	0.051226	0.0414654	3.2115	0.000307059	0.00680355
CRH11	609.094	1114.52	634.292	1133.84	888.765	409.039	18.0004	104.531	114.854	204.266	58.1879	85.6868	123.84	423.834	303.511		665.385	1346.87	634.292	1258.28	1173.3	985.72	77.8652	132.001	114.854	204.266	217.95	223.087	380.734	423.834	395.332		1010.64	108.24	215.101	399.966		1010.64	398.815	335.457	836.769		CRH11	0.394617	0.00164173	0.00463925	0.331925	0.00324622	0.0263114
CSA1	2691.09	19588.5	2922.29	21704.8	3442.76	1865.04	427	2231.53	3184.85	4687.27	1368.19	1580.69	1790.84	7209.83	4025.51		2939.8	23672.2	2922.29	24086.9	4544.94	4494.45	1847.09	2817.96	3184.85	4687.27	5124.71	4115.34	5505.77	7209.83	5243.34		10443.4	2616.64	4642.44	5986.32		10443.4	9641.12	7240.04	12524		CSA1	0.923175	0.250006	0.135426	0.693263	0.383322	0.388584
CSH1	1409.09	4572.52	1657.29	4830.84	903.765	500.039	379	1262.53	1133.85	603.266	259.188	339.687	440.84	1622.83	735.511		1539.32	5525.78	1657.29	5361.01	1193.1	1205.02	1639.46	1594.32	1133.85	603.266	970.819	884.378	1355.32	1622.83	958.024		2746.92	1455.88	819.488	1312.06		2746.92	5364.24	1278.02	2744.96		CSH1	1.95282	0.338852	0.173213	0.465256	0.168603	0.221613
DAK2	341.094	267.52	388.292	294.844	151.765	93.0385	23.0004	87.531	83.8539	121.266	25.1879	42.6868	16.8396	248.834	111.511		372.617	323.292	388.292	327.202	200.351	224.208	99.4939	110.534	83.8539	121.266	94.3443	111.136	51.7719	248.834	145.246		305.994	97.9605	108.915	148.617		305.994	360.94	169.857	310.922		DAK2	1.17957	0.00286143	0.00619802	0.555101	0.00381809	0.0276124
DDR48	7073.09	23028.5	7396.29	24984.8	6700.76	4604.04	2132	4463.53	3109.85	3945.27	1797.19	2044.69	1873.84	6647.83	3603.51		7726.77	27829.4	7396.29	27726.8	8845.97	11095	9222.48	5636.52	3109.85	3945.27	6731.58	5323.36	5760.95	6647.83	4693.68		15103.4	5989.62	5333.4	5700.82		15103.4	22069	8317.63	11926.7		DDR48	1.4612	0.174497	0.0978311	0.550713	0.1441	0.208093
DFG5	269.094	632.52	279.292	644.844	275.765	94.0385	39.0004	176.531	146.854	267.266	82.1879	102.687	51.8396	298.834	163.511		293.963	764.385	279.292	715.613	364.049	226.618	168.706	222.922	146.854	267.266	307.844	267.346	159.376	298.834	212.977		440.653	179.494	280.819	223.729		440.653	661.354	437.947	468.063		DFG5	1.50085	0.108693	0.0704884	0.993858	0.296209	0.319042
ECE1	179799	114509	193992	122733	151346	73162	6306	24224.5	30666.9	89693.3	25664.2	39935.7	27999.8	67739.8	68084.5		196416	138381	193992	136202	199798	176309	27278.1	30590.6	30666.9	89693.3	96128.2	103973	86082.9	67739.8	88682		173516	29511.9	96598.2	80834.9		173516	108738	150648	169115		ECE1	0.626671	7.54714e-05	0.000809679	0.868207	0.00334266	0.0263114
ECM331	1322.09	1807.52	1346.29	1962.84	1303.76	819.039	167	515.531	558.854	1461.27	381.188	468.687	224.84	516.834	420.511		1444.28	2184.34	1346.29	2178.26	1721.16	1973.76	722.401	651.009	558.854	1461.27	1427.78	1220.23	691.249	516.834	547.727		1808.01	644.088	1369.76	585.27		1808.01	2373.17	2136.19	1224.44		ECM331	1.31258	0.00111127	0.00438951	1.18151	0.089575	0.152671
EFG1	664.094	1408.52	718.292	1477.84	1156.76	438.039	73.0004	403.531	471.854	1335.27	336.188	430.687	125.84	412.834	289.511		725.468	1702.16	718.292	1640.03	1527.1	1055.61	315.781	509.576	471.854	1335.27	1259.23	1121.3	386.882	412.834	377.096		1228.11	432.404	1238.6	392.271		1228.11	1593.21	1931.64	820.669		EFG1	1.29729	0.0226818	0.0252698	1.57286	0.970511	0.811898
ELF1	125.094	103.52	156.292	124.844	112.765	36.0385	23.0004	125.531	99.8539	352.266	77.1879	99.6868	36.8396	241.834	83.5107		136.655	125.102	156.292	138.545	148.866	86.8473	99.4939	158.52	99.8539	352.266	289.116	259.536	113.26	241.834	108.775		132.051	119.289	300.306	154.623		132.051	439.526	468.338	323.487		ELF1	3.32846	0.534115	0.256434	3.54664	0.000167988	0.00616445
ENA2	1303.09	1418.52	1430.29	1582.84	1605.76	982.039	176	496.531	592.854	1441.27	410.188	632.687	295.84	897.834	757.511		1423.52	1714.25	1430.29	1756.55	2119.84	2366.56	761.333	627.016	592.854	1441.27	1536.41	1647.21	909.532	897.834	986.68		1801.84	660.401	1541.63	931.348		1801.84	2433.28	2404.22	1948.47		ENA2	1.35044	0.00154832	0.00463925	1.33432	0.292631	0.317392
ENA21	2159.09	3905.52	2424.29	4270.84	2266.76	1050.04	375	1333.53	957.854	1590.27	630.188	711.687	780.84	3509.83	1956.51		2358.63	4719.72	2424.29	4739.55	2992.45	2530.43	1622.16	1683.97	957.854	1590.27	2360.44	1852.88	2400.62	3509.83	2548.41		3294.18	1421.33	1934.53	2819.62		3294.18	5236.95	3016.97	5898.93		ENA21	1.58976	0.0307779	0.0311	0.915848	0.0907635	0.153015
FAV2	166.094	116.52	170.292	93.8437	125.765	26.0385	50.0004	91.531	58.8539	113.266	17.1879	45.6868	21.8396	120.834	47.5107		181.444	140.812	170.292	104.143	166.028	62.7488	216.289	115.585	58.8539	113.266	64.3793	118.946	67.1439	120.834	61.8841		137.578	130.243	98.8639	83.2873		137.578	479.885	154.182	174.245		FAV2	3.48809	0.862244	0.402844	1.12069	0.233333	0.282734
FBP1	1521.09	1090.52	1716.29	1217.84	924.765	399.039	230	1050.53	864.854	1104.27	275.188	334.687	349.84	1209.83	745.511		1661.67	1317.87	1716.29	1351.5	1220.82	961.621	994.923	1326.6	864.854	1104.27	1030.75	871.361	1075.55	1209.83	971.049		1371.63	1062.13	1002.13	1085.48		1371.63	3913.45	1562.85	2270.93		FBP1	2.85314	0.149073	0.0863627	1.13941	0.071752	0.137392
FDH1	1346.09	2555.52	1463.29	2957.84	1938.76	1222.04	411	619.531	437.854	330.266	207.188	365.687	609.84	2909.83	1911.51		1470.5	3088.28	1463.29	3282.45	2559.45	2944.92	1777.88	782.34	437.854	330.266	776.047	952.07	1874.9	2909.83	2489.8		2468.15	999.359	686.128	2424.84		2468.15	3682.18	1070.04	5073.01		FDH1	1.49188	0.0322948	0.0311824	0.433539	0.00913102	0.0472074
FGR15	62.094	55.5205	50.2919	56.8437	47.7649	1	1	54.531	24.8539	31.2663	0.187916	10.6868	1	1	1		67.8326	67.0951	50.2919	63.0821	63.0565	2.40985	1	68.8614	24.8539	31.2663	0.70386	27.8232	1	1	1		52.2947	31.5718	19.9311	1		52.2947	116.328	31.0833	1		FGR15	2.22446	0.332796	0.171124	0.594387	0.0883643	0.152281
FKH2	133.094	63.5205	115.292	92.8437	53.7649	24.0385	1	4.53102	2.85391	1	1	1	1	1	1		145.394	76.7629	115.292	103.033	70.9773	57.9291	1	5.72174	2.85391	1	1	1	1	1	1		94.8981	3.19188	1	1		94.8981	11.7606	1	1		FKH2	0.123929	0.00218698	0.00527913	0.0105376	0.00190808	0.0211388
FRP1	1156.09	4330.52	1321.29	4775.84	3064.76	1018.04	185	1412.53	1827.85	4676.27	1218.19	1547.69	1534.84	4293.83	3716.51		1262.94	5233.33	1321.29	5299.97	4045.93	2453.32	800.264	1783.74	1827.85	4676.27	4562.87	4029.42	4718.72	4293.83	4840.86		3269.46	1470.62	4422.85	4617.81		3269.46	5418.56	6897.59	9660.9		FRP1	1.65732	0.154124	0.0886981	2.1097	0.334093	0.350121
FRP2	493.094	2073.52	501.292	2195.84	504.765	275.039	75.0004	622.531	538.854	758.266	243.188	311.687	321.84	973.834	635.511		538.665	2505.8	501.292	2436.83	666.362	662.8	324.433	786.128	538.854	758.266	910.889	811.48	989.466	973.834	827.771		1218.62	549.805	826.878	930.357		1218.62	2025.78	1289.55	1946.4		FRP2	1.66235	0.292692	0.153222	1.0582	0.522541	0.500285
FRP3	1190.09	1491.52	1242.29	1489.84	1033.76	866.039	221	848.531	907.854	1153.27	357.188	486.687	385.84	1674.83	1264.51		1300.08	1802.47	1242.29	1653.35	1364.72	2087.02	955.991	1071.52	907.854	1153.27	1337.89	1267.09	1186.23	1674.83	1647.06		1574.99	978.455	1252.75	1502.71		1574.99	3605.16	1953.71	3143.81		FRP3	2.28901	0.0208002	0.0238917	1.24046	0.153642	0.212766
FTR1	5565.09	9311.52	6044.29	10192.8	8183.76	3451.04	554	2081.53	1499.85	3677.27	1198.19	1483.69	2473.84	9076.83	5846.51		6079.41	11252.7	6044.29	11311.5	10803.7	8316.47	2396.46	2628.54	1499.85	3677.27	4487.95	3862.8	7605.59	9076.83	7615.25		8968.02	2174.95	4009.34	8099.23		8968.02	8013.71	6252.7	16944.4		FTR1	0.893588	0.0028472	0.00619802	0.697222	0.013261	0.0571328
GAL1	7377.09	3094.52	7823.29	3351.84	6504.76	3427.04	303	1388.53	2268.85	6652.27	1421.19	2093.69	776.84	2531.83	2478.51		8058.87	3739.65	7823.29	3719.69	8587.22	8258.63	1310.7	1753.43	2268.85	6652.27	5323.23	5450.94	2388.32	2531.83	3228.33		6697.89	1777.66	5808.81	2716.16		6697.89	6549.87	9059.04	5682.48		GAL1	0.9779	0.00960302	0.0139084	1.35252	0.548265	0.518511
GAL4	758.094	744.52	821.292	850.844	616.765	438.039	80.0004	121.531	176.854	387.266	85.1879	121.687	135.84	535.834	327.511		828.155	899.734	821.292	944.22	814.218	1055.61	346.061	153.469	176.854	387.266	319.081	316.813	417.626	535.834	426.592		893.871	225.461	341.054	460.018		893.871	830.722	531.885	962.402		GAL4	0.929354	2.64946e-05	0.000460476	0.595035	3.09278e-05	0.00239845
GAP2	327.094	1032.52	398.292	1134.84	542.765	528.039	256	291.531	352.854	245.266	130.188	214.687	242.84	1214.83	711.511		357.323	1247.78	398.292	1259.39	716.527	1272.49	1107.39	368.144	352.854	245.266	487.634	558.939	746.588	1214.83	926.763		875.3	609.463	430.613	962.728		875.3	2245.59	671.556	2014.12		GAP2	2.56551	0.418163	0.207648	0.76723	0.143309	0.208093
GCA2	1561.09	385.52	1629.29	395.844	417.765	326.039	15.0004	59.531	111.854	232.266	29.1879	71.6868	107.84	498.834	277.511		1705.37	465.892	1629.29	439.286	551.509	785.702	64.888	75.1754	111.854	232.266	109.327	186.637	331.543	498.834	361.466		929.508	83.9724	176.077	397.281		929.508	309.4	274.598	831.151		GCA2	0.332864	0.0462177	0.0393756	0.295423	0.0685472	0.132896
GCN4	2526.09	2770.52	2607.29	2791.84	2439.76	1283.04	266	868.531	909.854	2429.27	585.188	749.687	715.84	3586.83	2354.51		2759.55	3348.11	2607.29	3098.24	3220.84	3091.92	1150.65	1096.78	909.854	2429.27	2191.89	1951.82	2200.78	3586.83	3066.82		3020.99	1052.43	2190.99	2951.48		3020.99	3877.71	3416.93	6174.78		GCN4	1.28359	9.84773e-06	0.000420459	1.13106	0.00338516	0.0263114
GIS2	748.094	361.52	825.292	384.844	539.765	273.039	174	459.531	274.854	797.266	175.188	219.687	230.84	725.834	405.511		817.231	436.888	825.292	427.079	712.567	657.981	752.681	580.293	274.854	797.266	656.187	571.957	709.695	725.834	528.189		646.173	535.943	675.137	654.573		646.173	1974.7	1052.9	1369.43		GIS2	3.056	0.457216	0.224475	1.62944	0.807605	0.699883
GNP1	12312.1	6378.52	14128.3	6951.84	9610.76	5358.04	588	1953.53	3219.85	7004.27	1989.19	3600.69	2204.84	6175.83	5243.51		13449.9	7708.28	14128.3	7714.78	12687.6	12912	2543.54	2466.91	3219.85	7004.27	7450.74	9374.43	6778.58	6175.83	6829.82		11433.5	2743.43	7943.14	6594.75		11433.5	10108.3	12387.6	13796.9		GNP1	0.884096	0.00165497	0.00463925	1.08345	0.0954452	0.158014
GPD2	399.094	176.52	467.292	177.844	499.765	246.039	235	324.531	215.854	698.266	126.188	230.687	182.84	864.834	206.511		435.977	213.321	467.292	197.361	659.761	592.915	1016.55	409.816	215.854	698.266	472.652	600.596	562.124	864.834	268.986		427.771	547.407	590.505	565.315		427.771	2016.95	920.912	1182.69		GPD2	4.71501	0.55836	0.266601	2.15282	0.223034	0.278728
HAC1	605.094	740.52	593.292	826.844	645.765	237.039	133	455.531	342.854	599.266	183.188	235.687	194.84	737.834	334.511		661.015	894.901	593.292	917.586	852.502	571.226	575.326	575.242	342.854	599.266	686.152	613.613	599.016	737.834	435.71		748.42	497.807	633.01	590.853		748.42	1834.19	987.202	1236.12		HAC1	2.45075	0.0515335	0.0414654	1.31905	0.267229	0.300614
HAP2	184.094	324.52	189.292	393.844	468.765	171.039	27.0004	203.531	203.854	435.266	144.188	196.687	108.84	488.834	309.511		201.108	392.175	189.292	437.066	618.837	412.176	116.797	257.018	203.854	435.266	540.073	512.076	334.617	488.834	403.147		375.109	192.556	495.805	408.866		375.109	709.482	773.225	855.388		HAP2	1.8914	0.110387	0.0710566	2.06133	0.259703	0.29837
HAP3	29.094	56.5205	26.2919	66.8437	41.7649	8.03852	1	1	1	1	1	1	1	44.834	16.5107		31.7828	68.3036	26.2919	74.1796	55.1356	19.3716	1	1	1	1	1	1	1	44.834	21.5057		45.8442	1	1	22.4466		45.8442	1	1	46.9604		HAP3	0.021813	0.014164	0.0183709	0.021813	0.014164	0.0578115
HAP43	229.094	357.52	307.292	379.844	501.765	228.039	91.0004	354.531	166.854	411.266	143.188	184.687	194.84	532.834	351.511		250.266	432.055	307.292	421.53	662.401	549.538	393.644	447.7	166.854	411.266	536.327	480.834	599.016	532.834	457.853		437.18	336.066	476.143	529.901		437.18	1238.25	742.561	1108.61		HAP43	2.83236	0.375499	0.188618	1.69852	0.690425	0.618988
HEM1	161.094	115.52	159.292	152.844	187.765	45.0385	1.00043	52.531	49.8539	174.266	9.18792	41.6868	9.83962	155.834	86.5107		175.982	139.604	159.292	169.618	247.877	108.536	4.32761	66.3358	49.8539	174.266	34.4144	108.532	30.251	155.834	112.683		166.818	40.1725	105.738	99.5892		166.818	148.017	164.901	208.35		HEM1	0.887298	0.00419441	0.00794422	0.988512	0.155748	0.213614
HGT7	10475.1	3268.52	10598.3	3506.84	8920.76	4072.04	740	1079.53	2420.85	6184.27	1615.19	2463.69	1850.84	5382.83	3841.51		11443.2	3949.93	10598.3	3891.71	11776.7	9812.98	3201.05	1363.22	2420.85	6184.27	6049.88	6414.24	5690.24	5382.83	5003.68		8578.79	2328.38	6216.13	5358.92		8578.79	8579.01	9694.26	11211.4		HGT7	1.00002	0.0260405	0.0282865	1.13003	0.317592	0.337387
HOG1	211.094	396.52	234.292	434.844	172.765	74.0385	53.0004	136.531	110.854	199.266	33.1879	53.6868	33.8396	162.834	77.5107		230.603	479.185	234.292	482.566	228.074	178.421	229.266	172.41	110.854	199.266	124.309	139.774	104.037	162.834	100.96		305.524	170.844	154.45	122.61		305.524	629.481	240.87	256.513		HOG1	2.06033	0.157471	0.0900279	0.788384	0.113127	0.180886
HSP104	8048.09	2518.52	9155.29	2670.84	4472.76	3800.04	1052	3975.53	9273.85	27140.3	6256.19	8053.69	1094.84	1670.83	1133.51		8791.88	3043.57	9155.29	2963.96	5904.69	9157.51	4550.68	5020.28	9273.85	27140.3	23433.3	20967.9	3365.98	1670.83	1476.43		6502.82	6281.6	23847.1	2171.08		6502.82	23144.9	37190.4	4542.12		HSP104	3.5592	0.916297	0.425808	5.71913	8.12298e-05	0.00419958
HSP70	10830.1	6390.52	12551.3	7130.84	4478.76	3663.04	1115	3300.53	5781.85	14558.3	3445.19	4677.69	1350.84	3746.83	1966.51		11831	7722.78	12551.3	7913.42	5912.61	8827.36	4823.2	4167.89	5781.85	14558.3	12904.4	12178.4	4153.03	3746.83	2561.44		9126.41	4924.32	13213.7	3487.1		9126.41	18143.9	20607.2	7295.36		HSP70	1.98806	0.0311901	0.0311542	2.25797	0.0379293	0.0932964
HTA1	4114.09	4302.52	4320.29	4824.84	4038.76	2070.04	393	1136.53	1211.85	2283.27	557.188	742.687	959.84	3347.83	2740.51		4494.31	5199.49	4320.29	5354.35	5331.75	4988.47	1700.02	1435.2	1211.85	2283.27	2087.01	1933.59	2950.94	3347.83	3569.59		4948.11	1449.03	2101.29	3289.46		4948.11	5339	3277.04	6881.86		HTA1	1.079	4.82551e-06	0.000419337	0.66228	1.59719e-05	0.00239845
HTA2	1216.09	1544.52	1394.29	1625.84	1288.76	715.039	230	561.531	528.854	1055.27	228.188	341.687	346.84	1170.83	1019.51		1328.48	1866.51	1394.29	1804.27	1701.35	1723.13	994.923	709.098	528.854	1055.27	854.704	889.585	1066.33	1170.83	1327.94		1636.34	744.291	933.185	1188.37		1636.34	2742.38	1455.34	2486.18		HTA2	1.67592	0.00082626	0.0035901	0.889383	0.00144682	0.0187002
HWP1	39715.1	43402.5	42031.3	48826.8	25640.8	14473	1672	4941.53	5104.85	13255.3	4298.19	5810.69	3677.84	13753.8	8600.51		43385.5	52450.9	42031.3	54185.4	33849.5	34877.8	7232.64	6240.13	5104.85	13255.3	16099.4	15128.2	11307.2	13753.8	11202.4		43463.4	6192.54	14827.6	12087.8		43463.4	22816.7	23124.2	25288.9		HWP1	0.524964	0.000164532	0.00119149	0.532038	0.000829326	0.0142921
HYR1	6385.09	18549.5	7065.29	20574.8	3514.76	1656.04	174	591.531	923.854	2138.27	733.188	1010.69	222.84	1238.83	544.511		6975.19	22416.6	7065.29	22832.8	4639.99	3990.8	752.681	746.982	923.854	2138.27	2746.24	2631.33	685.1	1238.83	709.241		11320.1	807.839	2505.28	877.725		11320.1	2976.52	3907.07	1836.29		HYR1	0.26294	0.0870039	0.0586096	0.345144	0.139345	0.208093
IFD6	512.094	605.52	538.292	666.844	140.765	100.039	1	37.531	58.8539	53.2663	1	13.6868	47.8396	305.834	102.511		559.42	731.756	538.292	740.027	185.83	241.077	1	47.3939	58.8539	53.2663	1	35.6337	147.079	305.834	133.523		499.401	35.7493	29.9667	195.479		499.401	131.72	46.7341	408.96		IFD6	0.263756	0.0139473	0.0183639	0.0935804	0.0131392	0.0571328
IHD1	4548.09	8534.52	5150.29	9013.84	5327.76	1973.04	830	3491.53	3147.85	7454.27	1889.19	2681.69	1679.84	4938.83	3088.51		4968.42	10313.8	5150.29	10003.1	7033.41	4754.72	3590.37	4409.08	3147.85	7454.27	7076.17	6981.8	5164.51	4938.83	4022.87		7037.28	3715.77	7170.75	4708.74		7037.28	13690.9	11183	9851.15		IHD1	1.94548	0.0685734	0.0496586	1.58911	0.932861	0.790638
INO4	95.094	168.52	82.2919	192.844	112.765	40.0385	10.0004	50.531	49.8539	38.2663	1	11.6868	4.83962	104.834	33.5107		103.882	203.653	82.2919	214.008	148.866	96.4866	43.2593	63.8102	49.8539	38.2663	1	30.4267	14.879	104.834	43.6487		141.531	52.3078	23.231	54.4539		141.531	192.73	36.2296	113.923		INO4	1.36175	0.0348358	0.0327492	0.255983	0.0113561	0.0550416
IRE1	211.094	318.52	214.292	347.844	340.765	184.039	26.0004	97.531	119.854	337.266	84.1879	91.6868	19.8396	159.834	70.5107		230.603	384.924	214.292	386.018	449.858	443.504	112.471	123.162	119.854	337.266	315.336	238.708	60.9951	159.834	91.8423		351.533	118.496	297.103	104.224		351.533	436.602	463.343	218.046		IRE1	1.24199	0.00713065	0.0110325	1.31806	0.43039	0.433464
IRO1	431.094	610.52	545.292	673.844	578.765	274.039	57.0004	248.531	235.854	686.266	166.188	229.687	16.8396	120.834	59.5107		470.935	737.799	545.292	747.795	764.052	660.391	246.569	313.843	235.854	686.266	622.476	597.992	51.7719	120.834	77.5144		654.377	265.422	635.578	83.3734		654.377	977.96	991.206	174.425		IRO1	1.49449	0.00118765	0.00448726	1.51473	0.80773	0.699883
KIP4	996.094	1533.52	1092.29	1671.84	812.765	456.039	80.0004	337.531	470.854	1165.27	243.188	369.687	71.8396	266.834	205.511		1088.15	1853.22	1092.29	1855.32	1072.97	1098.98	346.061	426.232	470.854	1165.27	910.889	962.484	220.864	266.834	267.684		1343.49	414.382	1012.88	251.794		1343.49	1526.81	1579.62	526.778		KIP4	1.13645	0.0058337	0.00974902	1.17576	0.21399	0.269836
KRE1	449.094	550.52	460.292	640.844	750.765	350.039	83.0004	201.531	156.854	337.266	102.188	149.687	65.8396	238.834	171.511		490.598	665.29	460.292	711.174	991.117	843.539	359.038	254.492	156.854	337.266	382.757	389.711	202.418	238.834	223.398		693.668	256.795	369.911	221.55		693.668	946.172	576.89	463.504		KRE1	1.36401	0.0111071	0.0150814	0.831651	0.0330655	0.0872247
MAC1	87.094	194.52	85.2919	224.844	72.7649	23.0385	0.00043104	20.531	29.8539	12.2663	1	15.6868	1	64.834	45.5107		95.143	235.073	85.2919	249.519	96.0601	55.5193	0.00186457	25.9264	29.8539	12.2663	1	40.8408	1	64.834	59.279		136.101	18.5941	18.0357	41.7043		136.101	68.5107	28.1273	87.2496		MAC1	0.503381	0.0524455	0.041812	0.206665	0.0523922	0.110691
MAE1	751.094	1056.52	893.292	1219.84	526.765	285.039	17.0004	80.531	138.854	301.266	42.1879	98.6868	146.84	645.834	357.511		820.508	1276.78	893.292	1353.72	695.405	686.899	73.5395	101.694	138.854	301.266	158.02	256.932	451.445	645.834	465.668		954.433	104.696	238.739	520.982		954.433	385.756	372.322	1089.95		MAE1	0.404173	0.0018095	0.00491393	0.390098	0.0047924	0.0317435
MBF1	1739.09	1864.52	2072.29	2030.84	1920.76	1033.04	393	1094.53	959.854	2184.27	562.188	708.687	470.84	1554.83	1124.51		1899.82	2253.23	2072.29	2253.72	2535.68	2489.46	1700.02	1382.17	959.854	2184.27	2105.74	1845.07	1447.55	1554.83	1464.71		2250.7	1347.35	2045.03	1489.03		2250.7	4964.36	3189.29	3115.2		MBF1	2.20569	0.00286219	0.00619802	1.41702	0.238244	0.286446
MDM34	10184.1	6119.52	10903.3	6895.84	10397.8	5753.04	476	2636.53	4079.85	11779.3	2659.19	3616.69	1718.84	4252.83	4625.51		11125.3	7395.29	10903.3	7652.63	13726.5	13863.9	2059.06	3329.39	4079.85	11779.3	9960.3	9416.08	5284.41	4252.83	6024.86		10777.8	3156.1	10385.2	5187.37		10777.8	11628.8	16196.1	10852.5		MDM34	1.07896	0.00308568	0.00638443	1.50272	0.828406	0.709866
MET28	612.094	560.52	627.292	608.844	513.765	205.039	102	335.531	243.854	503.266	98.1879	206.687	125.84	934.834	423.511		668.662	677.375	627.292	675.662	678.243	494.111	441.228	423.706	243.854	503.266	367.774	538.111	386.882	934.834	551.635		636.891	369.596	469.717	624.45		636.891	1361.79	732.541	1306.41		MET28	2.13819	0.00292427	0.00619802	1.15018	0.0190369	0.0671052
NDT80	604.094	555.52	717.292	583.844	841.765	278.039	116	481.531	351.854	1000.27	320.188	391.687	167.84	584.834	378.511		659.923	671.333	717.292	647.918	1111.25	670.03	501.788	608.074	351.854	1000.27	1199.3	1019.76	516.007	584.834	493.021		746.291	487.239	1073.11	531.288		746.291	1795.25	1673.55	1111.51		NDT80	2.40557	0.0646031	0.0475764	2.24249	0.0253988	0.0793299
NPR1	163.094	138.52	187.292	141.844	215.765	88.0385	1	25.531	53.8539	141.266	14.1879	47.6868	15.8396	108.834	89.5107		178.167	167.399	187.292	157.411	284.841	212.159	1	32.2404	53.8539	141.266	53.1425	124.153	48.6975	108.834	116.59		197.878	29.0314	106.187	91.3739		197.878	106.968	165.603	191.163		NPR1	0.540574	0.000728531	0.00333207	0.836894	0.0271948	0.0804042
NRG1	1078.09	441.52	1194.29	482.844	2343.76	956.039	93.0004	414.531	619.854	1810.27	454.188	746.687	315.84	808.834	704.511		1177.73	533.566	1194.29	535.834	3094.1	2303.91	402.296	523.467	619.854	1810.27	1701.21	1944.01	971.02	808.834	917.646		1473.24	515.206	1818.5	899.166		1473.24	1898.3	2836.01	1881.14		NRG1	1.28852	0.162303	0.0921839	1.92502	0.591301	0.555823
PCK1	18953.1	11821.5	20346.3	12848.8	14040.8	6109.04	966	4555.53	4983.85	8182.27	2288.19	2734.69	1869.84	7553.83	4348.51		20704.7	14286	20346.3	14259	18535.8	14721.8	4178.67	5752.7	4983.85	8182.27	8570.68	7119.79	5748.65	7553.83	5664.06		17142.3	4971.74	7957.58	6322.18		17142.3	18318.6	12410.1	13226.6		PCK1	1.06862	0.000321512	0.00192576	0.723948	0.00167143	0.0199415
PES1	1.09399	1	4.29192	7.84374	3.76489	1	1	1	1	1	1	1	1	1	1		1.19509	1.20848	4.29192	8.70456	4.9702	2.40985	1	1	1	1	1	1	1	1	1		3.79668	1	1	1		3.79668	1	1	1		PES1	0.263388	0.146647	0.0863627	0.263388	0.146647	0.208153
PFK2	2216.09	1424.52	2526.29	1551.84	3072.76	1403.04	162	532.531	1337.85	3479.27	737.188	1159.69	444.84	1175.83	919.511		2420.9	1721.5	2526.29	1722.15	4056.49	3381.11	700.772	672.477	1337.85	3479.27	2761.22	3019.26	1367.62	1175.83	1197.69		2638.07	903.701	3086.58	1247.05		2638.07	3329.73	4813.63	2608.95		PFK2	1.26218	0.0191042	0.0233825	1.82468	0.458057	0.446821
PGA13	1301.09	5552.52	1436.29	5929.84	1844.76	1050.04	179	377.531	387.854	430.266	176.188	391.687	346.84	894.834	411.511		1421.34	6710.08	1436.29	6580.62	2435.35	2530.43	774.31	476.744	387.854	430.266	659.932	1019.76	1066.33	894.834	536.005		3519.02	546.302	703.32	832.388		3519.02	2012.88	1096.85	1741.44		PGA13	0.571999	0.0839786	0.0574625	0.311692	0.0986477	0.161055
PGA17	4.09399	46.5205	18.2919	60.8437	90.7649	33.0385	16.0004	7.53102	31.8539	45.2663	1	17.6868	25.8396	236.834	181.511		4.47234	56.2188	18.2919	67.5211	119.823	79.6177	69.2137	9.51012	31.8539	45.2663	1	46.0478	79.4415	236.834	236.423		57.6574	36.8593	30.7714	184.233		57.6574	135.81	47.989	385.433		PGA17	2.35546	0.475286	0.232036	0.832313	0.351378	0.363325
PGA25	8.09399	32.5205	9.29192	39.8437	67.7649	38.0385	1	1	1	1	1	1	1	187.834	107.511		8.84201	39.3002	9.29192	44.2164	89.4594	91.667	1	1	1	1	1	1	1	187.834	140.036		47.1295	1	1	109.623		47.1295	1	1	229.343		PGA25	0.0212181	0.0736588	0.0516206	0.0212181	0.0736588	0.138202
PGA34	795.094	786.52	847.292	863.844	1013.76	458.039	98.0004	403.531	511.854	1588.27	362.188	522.687	141.84	595.834	429.511		868.575	950.49	847.292	958.647	1338.31	1103.8	423.925	509.576	511.854	1588.27	1356.62	1360.82	436.073	595.834	559.45		1011.19	481.785	1435.23	530.452		1011.19	1775.16	2238.3	1109.76		PGA34	1.75552	0.00209523	0.00520216	2.21354	0.00986346	0.0493491
PGA37	86.094	160.52	112.292	178.844	149.765	34.0385	1	16.531	52.8539	105.266	1	33.6868	2.83962	50.834	16.5107		94.0506	193.985	112.292	198.471	197.711	82.0276	1	20.8753	52.8539	105.266	3.74562	87.704	8.73015	50.834	21.5057		146.423	24.9097	65.572	27.0233		146.423	91.781	102.262	56.5353		PGA37	0.626821	0.0102038	0.0145362	0.6984	0.0782461	0.14209
PGA48	5280.09	2991.52	5297.29	3195.84	4568.76	3080.04	184	623.531	1299.85	4144.27	961.188	1287.69	912.84	1984.83	2085.51		5768.07	3615.18	5297.29	3546.57	6031.42	7422.42	795.938	787.391	1299.85	4144.27	3600.24	3352.51	2806.44	1984.83	2716.44		5280.16	961.061	3699	2502.57		5280.16	3541.07	5768.73	5235.62		PGA48	0.670638	0.00196938	0.00503351	1.09253	0.124542	0.19607
PGA53	200.094	373.52	241.292	479.844	90.7649	56.0385	16.0004	29.531	18.8539	1	1	1	24.8396	197.834	85.5107		218.586	451.39	241.292	532.505	119.823	135.044	69.2137	37.2916	18.8539	1	1	1	76.3671	197.834	111.38		283.107	41.7864	1	128.527		283.107	153.964	1	268.891		PGA53	0.543837	0.0502991	0.0414654	0.00353224	0.0276198	0.0804042
PGA7	1374.09	6978.52	1615.29	7515.84	3021.76	1477.04	246	1157.53	1142.85	2217.27	698.188	654.687	1122.84	3924.83	2544.51		1501.08	8433.37	1615.29	8340.68	3989.16	3559.43	1064.13	1461.72	1142.85	2217.27	2615.14	1704.48	3452.07	3924.83	3314.3		4573.17	1222.9	2178.97	3563.73		4573.17	4505.84	3398.17	7455.68		PGA7	0.985278	0.115631	0.0733455	0.743067	0.241703	0.286736
PHO89	846.094	1782.52	903.292	1989.84	924.765	654.039	59.0004	363.531	471.854	1107.27	288.188	373.687	138.84	488.834	472.511		924.288	2154.13	903.292	2208.22	1220.82	1576.13	255.221	459.065	471.854	1107.27	1079.44	972.898	426.85	488.834	615.459		1497.81	395.38	1053.2	510.381		1497.81	1456.79	1642.5	1067.77		PHO89	0.972613	0.0164728	0.0207461	1.0966	0.244031	0.286736
PHR1	3664.09	7632.52	4072.29	8429.84	3667.76	1892.04	716	1969.53	1766.85	4022.27	1206.19	1546.69	456.84	1299.83	940.511		4002.72	9223.71	4072.29	9354.98	4841.97	4559.52	3097.23	2487.11	1766.85	4022.27	4517.92	4026.82	1404.51	1299.83	1225.04		6009.2	2450.4	4189	1309.8		6009.2	9028.61	6532.89	2740.22		PHR1	1.50246	0.0553743	0.0429645	1.08715	0.274015	0.305754
PHR2	737.094	988.52	851.292	1084.84	996.765	367.039	220	683.531	377.854	738.266	201.188	353.687	209.84	986.834	603.511		805.214	1194.6	851.292	1203.9	1315.87	884.506	951.665	863.159	377.854	738.266	753.573	920.828	645.133	986.834	786.09		1042.56	730.893	804.222	806.019		1042.56	2693.01	1254.21	1686.27		PHR2	2.58306	0.11951	0.0752566	1.20301	0.125151	0.19607
PIL1	5738.09	7381.52	6175.29	7946.84	2253.76	1895.04	771	1685.53	1561.85	1880.27	547.188	847.687	635.84	3048.83	1702.51		6268.39	8920.38	6175.29	8818.98	2975.29	4566.75	3335.15	2128.48	1561.85	1880.27	2049.56	2206.96	1954.83	3048.83	2217.57		6287.52	2341.83	2045.59	2407.08		6287.52	8628.57	3190.18	5035.84		PIL1	1.37233	0.0287096	0.0304429	0.507383	0.0189652	0.0671052
PIR1	7471.09	1993.52	8155.29	2080.84	3470.76	2936.04	299	679.531	1094.85	2264.27	614.188	1323.69	911.84	2021.83	2045.51		8161.55	2409.12	8155.29	2309.21	4581.91	7075.4	1293.4	858.107	1094.85	2264.27	2300.51	3446.23	2803.37	2021.83	2664.34		5448.75	1082.12	2670.34	2496.51		5448.75	3987.12	4164.48	5222.95		PIR1	0.73175	0.0317152	0.0311824	0.764301	0.135933	0.208093
PLB5	231.094	408.52	263.292	427.844	371.765	129.039	17.0004	218.531	194.854	661.266	128.188	220.687	95.8396	252.834	164.511		252.451	493.687	263.292	474.798	490.783	310.963	73.5395	275.96	194.854	661.266	480.143	574.561	294.65	252.834	214.28		380.996	181.451	571.99	253.921		380.996	668.564	892.038	531.228		PLB5	1.75478	0.0413269	0.0359131	2.34133	0.0442608	0.0980692
POL1	61.094	130.52	70.2919	119.844	49.7649	24.0385	7.00043	22.531	31.8539	64.2663	1	9.6868	1	20.834	10.5107		66.7401	157.731	70.2919	132.996	65.6968	57.9291	30.2821	28.452	31.8539	64.2663	1	25.2197	1	20.834	13.6905		91.8975	30.196	30.162	11.8415		91.8975	111.259	47.0387	24.7736		POL1	1.21068	0.0449069	0.0386377	0.511861	0.0635129	0.124694
PRA1	2050.09	23608.5	2497.29	26134.8	1580.76	1155.04	246	871.531	1413.85	1314.27	316.188	354.687	369.84	2242.83	879.511		2239.56	28530.3	2497.29	29003	2086.84	2783.46	1064.13	1100.56	1413.85	1314.27	1184.32	923.431	1137.04	2242.83	1145.59		11190.1	1192.85	1140.67	1508.49		11190.1	4395.11	1778.92	3155.9		PRA1	0.392768	0.258991	0.138076	0.158973	0.25674	0.297167
RBR1	90.094	84.5205	129.292	73.8437	162.765	40.0385	194	204.531	72.8539	28.2663	21.1879	99.6868	7.83962	21.834	3.51072		98.4203	102.141	129.292	81.9478	214.873	96.4866	839.196	258.28	72.8539	28.2663	79.3618	259.536	24.1022	21.834	4.57281		120.527	390.11	122.388	16.8363		120.527	1437.38	190.868	35.2232		RBR1	11.9258	0.123284	0.0765244	1.58362	0.973649	0.811898
RBR2	57.094	116.52	50.2919	147.844	156.765	116.039	50.0004	68.531	78.8539	28.2663	0.187916	22.6868	30.8396	190.834	154.511		62.3705	140.812	50.2919	164.069	206.952	279.635	216.289	86.5405	78.8539	28.2663	0.70386	59.0653	94.8136	190.834	201.255		150.688	127.228	29.3452	162.301		150.688	468.777	45.7648	339.549		RBR2	3.1109	0.705973	0.331616	0.303705	0.0566349	0.113338
RBT1	42.094	25.5205	58.2919	32.8437	22.7649	6.03852	1	1	1	1	1	1	1	1	1		45.9842	30.8408	58.2919	36.4482	30.0529	14.5519	1	1	1	1	1	1	1	1	1		36.0283	1	1	1		36.0283	1	1	1		RBT1	0.0277559	0.00576118	0.00974902	0.0277559	0.00576118	0.0339598
RBT5	6645.09	37538.5	7578.29	39023.8	13588.8	7244.04	1128	4445.53	5121.85	10939.3	3145.19	3792.69	5498.84	24877.8	12775.5		7259.22	45364.4	7578.29	43306.6	17939.1	17457	4879.44	5613.79	5121.85	10939.3	11780.7	9874.3	16905.7	24877.8	16640.5		23150.8	5205.03	10864.7	19474.7		23150.8	19178.2	16943.9	40742.9		RBT5	0.828403	0.121701	0.0760852	0.731896	0.267471	0.300614
RCT1	3097.09	9731.52	3670.29	10665.8	3910.76	2104.04	998	2624.53	2083.85	3041.27	1170.19	1533.69	999.84	4485.83	2425.51		3383.32	11760.3	3670.29	11836.4	5162.77	5070.41	4317.09	3314.24	2083.85	3041.27	4383.08	3992.97	3073.91	4485.83	3159.3		6813.91	3238.4	3805.77	3573.02		6813.91	11932	5935.23	7475.1		RCT1	1.75113	0.177453	0.0988503	0.871046	0.243356	0.286736
RFG1	576.094	758.52	555.292	782.844	506.765	253.039	93.0004	318.531	254.854	620.266	106.188	190.687	69.8396	487.834	294.511		629.335	916.653	555.292	868.758	669.002	609.784	402.296	402.239	254.854	620.266	397.739	496.455	214.715	487.834	383.609		708.137	353.13	504.82	362.053		708.137	1301.12	787.285	757.45		RFG1	1.83739	0.00703831	0.0110325	1.11177	0.0770908	0.14209
RFX2	277.094	355.52	294.292	413.844	239.765	99.0385	16.0004	124.531	121.854	385.266	43.1879	125.687	19.8396	64.834	30.5107		302.702	429.638	294.292	459.261	316.524	238.668	69.2137	157.257	121.854	385.266	161.765	327.227	60.9951	64.834	39.7411		340.181	116.108	291.42	55.19		340.181	427.806	454.479	115.463		RFX2	1.25758	0.00420523	0.00794422	1.33599	0.492393	0.474349
RHR2	1739.09	752.52	2011.29	852.844	1211.76	544.039	1079	1972.53	986.854	1903.27	574.188	1044.69	549.84	3121.83	555.511		1899.82	909.402	2011.29	946.44	1599.7	1311.05	4667.48	2490.9	986.854	1903.27	2150.69	2719.85	1690.43	3121.83	723.569		1446.28	2715.08	2257.94	1845.28		1446.28	10003.8	3521.33	3860.5		RHR2	6.91692	0.136187	0.0820707	2.43474	0.0399703	0.0932964
RIM101	7090.09	4789.52	8296.29	4943.84	7170.76	3828.04	413	1479.53	2632.85	7235.27	2001.19	3094.69	1007.84	2863.83	2465.51		7745.34	5788.02	8296.29	5486.41	9466.44	9224.98	1786.53	1868.34	2632.85	7235.27	7495.68	8057.05	3098.51	2863.83	3211.4		7667.91	2095.91	7596	3057.91		7667.91	7722.47	11846.2	6397.46		RIM101	1.00712	0.000985665	0.00407878	1.54491	0.946024	0.797436
RNR22	5482.09	3580.52	6264.29	3989.84	4644.76	2301.04	88.0004	301.531	861.854	2061.27	423.188	547.687	486.84	1765.83	1209.51		5988.74	4326.97	6264.29	4427.71	6131.75	5545.15	380.667	380.771	861.854	2061.27	1585.1	1425.91	1496.74	1765.83	1575.42		5447.44	541.098	1690.76	1612.67		5447.44	1993.7	2636.8	3373.86		RNR22	0.365988	3.41935e-05	0.000495236	0.484044	0.000198725	0.00616445
ROB1	354.094	395.52	392.292	418.844	293.765	174.039	29.0004	183.531	146.854	381.266	73.1879	92.6868	64.8396	416.834	160.511		386.818	477.977	392.292	464.81	387.812	419.406	125.448	231.762	146.854	381.266	274.134	241.311	199.343	416.834	209.07		421.519	168.021	298.904	275.082		421.519	619.082	466.151	575.499		ROB1	1.46869	0.000102491	0.000809679	1.10588	0.0125808	0.0571328
RPN4	479.094	351.52	522.292	361.844	512.765	276.039	122	441.531	297.854	988.266	171.188	287.687	111.84	402.834	237.511		523.371	424.804	522.292	401.555	676.923	665.21	527.742	557.563	297.854	988.266	641.204	748.996	343.841	402.834	309.365		535.692	461.053	792.822	352.013		535.692	1698.77	1236.43	736.446		RPN4	3.17117	0.423003	0.208858	2.3081	0.0322901	0.0872247
RTA3	7.09399	14.5205	21.2919	2.84374	1.76489	1	1	1	1	1	1	1	1	1	1		7.74959	17.5476	21.2919	3.15583	2.32991	2.40985	1	1	1	1	1	1	1	1	1		9.08079	1	1	1		9.08079	1	1	1		RTA3	0.110123	0.148968	0.0863627	0.110123	0.148968	0.208153
SAP1	79.094	75.5205	67.2919	61.8437	52.7649	12.0385	1	1	1	1	1	1	1	1	1		86.4037	91.2646	67.2919	68.6308	69.6572	29.011	1	1	1	1	1	1	1	1	1		68.7099	1	1	1		68.7099	1	1	1		SAP1	0.014554	0.00129413	0.00451908	0.014554	0.00129413	0.0182472
SAP10	8.09399	22.5205	13.2919	25.8437	14.7649	1	1	1	1	1	1	1	1	1	1		8.84201	27.2154	13.2919	28.68	19.4918	2.40985	1	1	1	1	1	1	1	1	1		16.6552	1	1	1		16.6552	1	1	1		SAP10	0.0600415	0.0396937	0.0353893	0.0600415	0.0396937	0.0932964
SAP2	6.09399	1.52046	4.29192	9.84374	1	1	1	1	1	1	1	1	1	1	1		6.65718	1.83743	4.29192	10.9241	1.32014	2.40985	1	1	1	1	1	1	1	1	1		4.57343	1	1	1		4.57343	1	1	1		SAP2	0.218654	0.147681	0.0863627	0.218654	0.147681	0.208153
SAP4	2636.09	2643.52	2649.29	2853.84	2222.76	562.039	508	976.531	697.854	533.266	226.188	363.687	171.84	244.834	98.5107		2879.72	3194.63	2649.29	3167.04	2934.37	1354.43	2197.48	1233.16	697.854	533.266	847.213	946.863	528.305	244.834	128.313		2696.58	1376.16	775.781	300.484		2696.58	5070.54	1209.86	628.642		SAP4	1.88036	0.0337164	0.0321973	0.448664	0.00252655	0.0244917
SAP5	8826.09	13279.5	9586.29	14592.8	8715.76	2864.04	967	5759.53	5546.85	11685.3	3104.19	3704.69	1076.84	2616.83	1918.51		9641.78	16048	9586.29	16194.3	11506.1	6901.89	4182.99	7273.1	5546.85	11685.3	11627.1	9645.19	3310.64	2616.83	2498.92		11646.4	5667.65	10985.9	2808.8		11646.4	20882.7	17132.8	5876.28		SAP5	1.79306	0.0368975	0.0337003	1.47108	0.781549	0.684849
SAP6	2719.09	2945.52	2925.29	3304.84	1271.76	405.039	120	660.531	565.854	1079.27	326.188	420.687	141.84	157.834	65.5107		2970.39	3559.59	2925.29	3667.54	1678.91	976.08	519.091	834.114	565.854	1079.27	1221.77	1095.26	436.073	157.834	85.3296		2629.63	639.686	1132.1	226.412		2629.63	2356.95	1765.55	473.676		SAP6	0.896305	0.0177989	0.0220961	0.671406	0.052812	0.110691
SAP9	2890.09	3583.52	3193.29	3925.84	3883.76	1905.04	255	1004.53	1148.85	2678.27	759.188	937.687	512.84	1620.83	1313.51		3157.19	4330.6	3193.29	4356.69	5127.13	4590.85	1103.07	1268.52	1148.85	2678.27	2843.63	2441.28	1576.68	1620.83	1710.89		4125.96	1173.48	2654.39	1636.13		4125.96	4323.73	4139.61	3422.95		SAP9	1.04793	0.000429235	0.00219415	1.00331	0.0179107	0.0661418
SCW11	224.094	85.5205	237.292	121.844	192.765	94.0385	1	29.531	24.8539	68.2663	5.18792	19.6868	85.8396	121.834	130.511		244.804	103.349	237.292	135.216	254.477	226.618	1	37.2916	24.8539	68.2663	19.4319	51.2548	263.906	121.834	169.994		200.293	21.0485	46.3177	185.245		200.293	77.5541	72.2341	387.55		SCW11	0.387204	0.00249548	0.00586101	0.360642	0.00591176	0.0339598
SCW4	35.094	73.5205	26.2919	93.8437	123.765	70.0385	1	9.53102	20.8539	1	1	1	40.8396	388.834	371.511		38.3373	88.8476	26.2919	104.143	163.387	168.782	1	12.0357	20.8539	1	1	1	125.558	388.834	483.903		98.2982	11.2965	1	332.765		98.2982	41.6226	1	696.177		SCW4	0.423432	0.0470507	0.0396962	0.0101731	0.0304009	0.0857306
SEF1	311.094	274.52	342.292	308.844	649.765	269.039	62.0004	343.531	191.854	554.266	175.188	189.687	88.8396	330.834	201.511		339.845	331.751	342.292	342.738	857.783	648.341	268.198	433.809	191.854	554.266	656.187	493.852	273.129	330.834	262.474		477.125	297.954	568.102	288.812		477.125	1097.82	885.974	604.224		SEF1	2.30091	0.246489	0.134716	1.8569	0.528769	0.503142
SEF2	143.094	239.52	132.292	248.844	238.765	68.0385	29.0004	441.531	147.854	301.266	84.1879	114.687	75.8396	391.834	221.511		156.318	289.455	132.292	276.153	315.204	163.962	125.448	557.563	147.854	301.266	315.336	298.588	233.162	391.834	288.524		222.231	276.955	305.063	304.507		222.231	1020.45	475.757	637.058		SEF2	4.59186	0.613668	0.291409	2.14082	0.12708	0.197101
SGA1	139.094	112.52	121.292	109.844	194.765	62.0385	29.0004	126.531	86.8539	213.266	39.1879	88.6868	8.83962	55.834	20.5107		151.949	135.978	121.292	121.899	257.118	149.503	125.448	159.783	86.8539	213.266	146.783	230.897	27.1766	55.834	26.7158		156.29	124.028	196.982	36.5755		156.29	456.988	307.2	76.5194		SGA1	2.92398	0.367644	0.185746	1.96558	0.280962	0.309059
SIN3	304.094	302.52	389.292	368.844	218.765	119.039	28.0004	131.531	103.854	249.266	53.1879	51.6868	41.8396	221.834	107.511		332.198	365.588	389.292	409.323	288.801	286.864	121.123	166.097	103.854	249.266	199.222	134.567	128.632	221.834	140.036		345.344	130.358	194.352	163.501		345.344	480.309	303.098	342.059		SIN3	1.39081	0.000332409	0.00192576	0.877669	0.00511661	0.0317435
SIT1	752.094	2431.52	837.292	2660.84	1630.76	723.039	191	792.531	513.854	1907.27	519.188	561.687	493.84	1457.83	1021.51		821.601	2938.43	837.292	2952.86	2152.84	1742.41	826.219	1000.8	513.854	1907.27	1944.68	1462.36	1518.26	1457.83	1330.55		1907.57	780.292	1771.43	1435.55		1907.57	2875.02	2762.61	3003.31		SIT1	1.50716	0.0924678	0.0613393	1.44823	0.821179	0.707583
SMC2	49.094	83.5205	39.2919	103.844	29.7649	1	1	1	1	1	1	1	1	1	1		53.6311	100.932	39.2919	115.24	39.2939	2.40985	1	1	1	1	1	1	1	1	1		58.4666	1	1	1		58.4666	1	1	1		SMC2	0.0171038	0.0569977	0.0434482	0.0171038	0.0569977	0.113338
SOD4	243.094	294.52	241.292	364.844	238.765	117.039	83.0004	268.531	148.854	171.266	47.1879	86.6868	79.8396	331.834	151.511		265.56	355.921	241.292	404.884	315.204	282.045	359.038	339.099	148.854	171.266	176.748	225.69	245.46	331.834	197.347		310.818	282.331	191.235	258.214		310.818	1040.26	298.237	540.208		SOD4	3.34685	0.632739	0.298832	0.959525	0.016561	0.0642153
SOD5	40524.1	50504.5	45886.3	54901.8	31343.8	18527	983	6445.53	8960.85	22851.3	7143.19	11076.7	3529.84	8712.83	7506.51		44269.2	61033.5	45886.3	60927.1	41378.3	44647.3	4252.21	8139.38	8960.85	22851.3	26755.6	28838.3	10852.2	8712.83	9777.45		49690.3	7117.48	26148.4	9780.82		49690.3	26224.7	40779.3	20462.4		SOD5	0.527763	9.82942e-05	0.000809679	0.82067	0.00339283	0.0263114
SOD6	1058.09	244.52	1220.29	255.844	1130.76	619.039	27.0004	154.531	263.854	866.266	183.188	381.687	239.84	501.834	623.511		1155.88	295.497	1220.29	283.922	1492.77	1491.79	116.797	195.141	263.854	866.266	686.152	993.726	737.365	501.834	812.141		990.025	191.931	848.715	683.78		990.025	707.177	1323.6	1430.53		SOD6	0.714302	0.0490205	0.0409604	1.33694	0.689717	0.618988
SOG2	115.094	227.52	111.292	217.844	140.765	60.0385	1	25.531	29.8539	105.266	1	18.6868	8.83962	90.834	43.5107		125.731	274.953	111.292	241.751	185.83	144.684	1	32.2404	29.8539	105.266	1	48.6513	27.1766	90.834	56.674		180.707	21.0314	51.6392	58.2282		180.707	77.4913	80.5331	121.819		SOG2	0.428824	0.00523088	0.00909126	0.445657	0.0221199	0.0729956
SSB1	1176.09	1355.52	1375.29	1445.84	814.765	331.039	359	769.531	538.854	1284.27	300.188	386.687	262.84	1221.83	461.511		1284.79	1638.11	1375.29	1604.52	1075.61	797.752	1552.94	971.759	538.854	1284.27	1124.39	1006.74	808.076	1221.83	601.131		1296.01	1021.19	1138.47	877.014		1296.01	3762.6	1775.48	1834.8		SSB1	2.90322	0.345415	0.175536	1.36996	0.454475	0.446133
STF2	36762.1	10997.5	42001.3	12288.8	25707.8	16907	1743	5864.53	10124.9	25109.3	6571.19	11296.7	7509.84	17258.8	18153.5		40159.6	13290.2	42001.3	13637.5	33937.9	40743.4	7539.77	7405.69	10124.9	25109.3	24613.2	29411.1	23088.3	17258.8	23645.5		30628.3	8356.77	26377.8	21330.9		30628.3	30790.9	41137.1	44626.3		STF2	1.00531	0.0290718	0.0304429	1.34311	0.619333	0.571777
STP2	3321.09	2612.52	3716.29	2880.84	5152.76	2712.04	325	1488.53	1909.85	6153.27	1497.19	2021.69	866.84	2405.83	2133.51		3628.02	3157.17	3716.29	3197	6802.39	6535.59	1405.87	1879.71	1909.85	6153.27	5607.89	5263.48	2665.02	2405.83	2778.96		4506.08	1731.81	5674.88	2616.6		4506.08	6380.93	8850.17	5474.19		STP2	1.41607	0.029427	0.0304429	1.96405	0.291879	0.317392
SUT1	236.094	196.52	204.292	211.844	236.765	91.0385	17.0004	152.531	98.8539	219.266	71.1879	71.6868	57.8396	351.834	162.511		257.913	237.49	204.292	235.093	312.564	219.389	73.5395	192.615	98.8539	219.266	266.643	186.637	177.823	351.834	211.675		244.457	121.67	224.182	247.11		244.457	448.297	349.62	516.979		SUT1	1.83385	0.00723649	0.0110325	1.43019	0.481862	0.467105
TEC1	10612.1	3236.52	11927.3	3676.84	14003.8	7019.04	496	2218.53	4529.85	13886.3	3286.19	5124.69	2817.84	6195.83	7315.51		11592.8	3911.25	11927.3	4080.36	18487	16914.8	2145.57	2801.55	4529.85	13886.3	12308.8	13342.2	8663.19	6195.83	9528.66		11152.3	3158.99	13179.1	8129.23		11152.3	11639.4	20553.2	17007.1		TEC1	1.04369	0.0684839	0.0496586	1.84297	0.600734	0.561289
TPK1	109.094	119.52	150.292	150.844	373.765	126.039	25.0004	129.531	118.854	379.266	81.1879	128.687	42.8396	151.834	126.511		119.176	144.437	150.292	167.398	493.423	303.733	108.145	163.571	118.854	379.266	304.099	335.038	131.706	151.834	164.784		229.743	130.19	339.468	149.441		229.743	479.691	529.411	312.646		TPK1	2.08794	0.291092	0.153222	2.30436	0.250839	0.29252
TPK2	418.094	249.52	422.292	301.844	187.765	121.039	29.0004	56.531	66.8539	157.266	26.1879	54.6868	24.8396	141.834	85.5107		456.733	301.539	422.292	334.97	247.877	291.684	125.448	71.387	66.8539	157.266	98.0899	142.378	76.3671	141.834	111.38		342.516	87.8964	132.578	109.86		342.516	323.858	206.76	229.839		TPK2	0.945528	0.00138999	0.0046326	0.603651	0.00391665	0.0276124
TPS2	6723.09	5434.52	7851.29	5929.84	5040.76	2397.04	312	1326.53	2373.85	5890.27	1483.19	2016.69	920.84	1872.83	1826.51		7344.43	6567.48	7851.29	6580.62	6654.53	5776.49	1349.63	1675.13	2373.85	5890.27	5555.45	5250.47	2831.04	1872.83	2379.08		6795.81	1799.54	5565.4	2360.98		6795.81	6630.49	8679.43	4939.41		TPS2	0.975673	1.47051e-05	0.000420459	1.27717	0.0279937	0.0804042
TRR1	440.094	656.52	578.292	732.844	538.765	154.039	80.0004	281.531	158.854	224.266	72.1879	128.687	131.84	427.834	258.511		480.766	793.389	578.292	813.27	711.247	371.209	346.061	355.516	158.854	224.266	270.388	335.038	405.329	427.834	336.718		624.696	286.81	276.564	389.96		624.696	1056.77	431.311	815.835		TRR1	1.69165	0.0213029	0.0240418	0.690434	0.0148901	0.0592168
TRX1	1046.09	1093.52	987.292	1272.84	1023.76	445.039	349	888.531	554.854	860.266	242.188	379.687	204.84	764.834	561.511		1142.77	1321.49	987.292	1412.53	1351.52	1072.47	1509.69	1122.03	554.854	860.266	907.143	988.519	629.761	764.834	731.384		1214.68	1062.19	918.643	708.66		1214.68	3913.69	1432.66	1482.59		TRX1	3.22199	0.487962	0.235577	1.17945	0.0259478	0.0793299
TTR1	755.094	550.52	813.292	640.844	361.765	176.039	103	355.531	217.854	344.266	83.1879	110.687	60.8396	308.834	181.511		824.878	665.29	813.292	711.174	477.581	424.226	445.553	448.962	217.854	344.266	311.59	288.174	187.046	308.834	236.423		652.74	370.79	314.677	244.101		652.74	1366.19	490.75	510.683		TTR1	2.09301	0.0405291	0.0355755	0.75183	0.0124276	0.0571328
TUP1	579.094	696.52	611.292	690.844	402.765	194.039	54.0004	192.531	164.854	313.266	80.1879	112.687	79.8396	383.834	155.511		632.612	841.728	611.292	766.661	531.707	467.603	233.592	243.127	164.854	313.266	300.353	293.381	245.46	383.834	202.557		641.934	213.858	302.334	277.284		641.934	787.968	471.5	580.104		TUP1	1.22749	0.00156826	0.00463925	0.734499	0.00497393	0.0317435
TYE7	9360.09	4005.52	9856.29	4366.84	7906.76	3827.04	359	1768.53	3295.85	8587.27	1978.19	2767.69	1068.84	3097.83	2647.51		10225.1	4840.57	9856.29	4846.09	10438.1	9222.57	1552.94	2233.29	3295.85	8587.27	7409.53	7205.7	3286.05	3097.83	3448.46		8238.12	2360.7	7734.17	3277.45		8238.12	8698.09	12061.7	6856.74		TYE7	1.05583	0.00854522	0.0128031	1.46413	0.764165	0.673421
UCF1	56702.1	52377.5	61026.3	56435.8	70298.8	38733	3078	11991.5	20065.9	54880.3	12345.2	16014.7	13916.8	44168.8	37078.5		61942.4	63296.9	61026.3	62629.4	92804.4	93340.6	13314.6	15142.8	20065.9	54880.3	46240.3	41694.4	42786	44168.8	48295.8		72506.7	16174.4	47605	45083.6		72506.7	59595.4	74241.7	94319.2		UCF1	0.82193	0.000627799	0.00303087	1.02393	0.0395165	0.0932964
UGA32	42.094	111.52	37.2919	131.844	61.7649	25.0385	10.0004	16.531	29.8539	12.2663	17.1879	1	1	32.834	8.51072		45.9842	134.77	37.2919	146.313	81.5385	60.339	43.2593	20.8753	29.8539	12.2663	64.3793	1	1	32.834	11.0855		84.3727	31.3295	25.8819	14.9731		84.3727	115.435	40.3637	31.3253		UGA32	1.36815	0.0991396	0.0652669	0.478398	0.095766	0.158014
UGP1	1717.09	1133.52	1891.29	1202.84	1217.76	497.039	230	602.531	534.854	1275.27	358.188	434.687	337.84	1062.83	647.511		1875.78	1369.83	1891.29	1334.85	1607.62	1197.79	994.923	760.872	534.854	1275.27	1341.63	1131.71	1038.66	1062.83	843.401		1546.19	763.55	1249.54	981.631		1546.19	2813.33	1948.7	2053.67		UGP1	1.81952	0.00515372	0.00909126	1.26032	0.1426	0.208093
UME6	470.094	385.52	429.292	397.844	500.765	213.039	40.0004	126.531	157.854	459.266	71.1879	100.687	1	1	1		513.539	465.892	429.292	441.505	661.081	513.39	173.032	159.783	157.854	459.266	266.643	262.139	1	1	1		504.117	163.556	329.349	1		504.117	602.629	513.632	1		UME6	1.19542	0.000271753	0.00181656	1.01888	0.0331802	0.0872247
UPC2	247.094	470.52	283.292	507.844	771.765	313.039	15.0004	139.531	92.8539	403.266	77.1879	175.687	68.8396	219.834	224.511		269.93	568.612	283.292	563.578	1018.84	754.374	64.888	176.199	92.8539	403.266	289.116	457.403	211.641	219.834	292.432		576.438	111.314	383.262	241.302		576.438	410.14	597.71	504.828		UPC2	0.711508	0.0304558	0.0311	1.0369	0.302734	0.323821
WH11	83155.1	10182.5	89730.3	10881.8	10146.8	17370	6148	7765.53	7587.85	2972.27	2550.19	4542.69	4674.84	13982.8	8387.51		90840.1	12305.3	89730.3	12076.1	13395.2	41859.1	26594.7	9806.26	7587.85	2972.27	9552.03	11826.9	14372.4	13982.8	10925		43367.7	14662.9	8117.08	13093.4		43367.7	54026.2	12658.9	27392.7		WH11	1.24577	0.253819	0.136153	0.291896	0.166316	0.221567
YHB1	13174.1	5644.52	14172.3	6081.84	17031.8	5851.04	364	2343.53	3199.85	9800.27	2525.19	4356.69	2123.84	5435.83	3488.51		14391.6	6821.26	14172.3	6749.3	22484.4	14100.1	1574.57	2959.4	3199.85	9800.27	9458.39	11342.7	6529.55	5435.83	4543.89		13119.8	2577.94	10200.4	5503.09		13119.8	9498.54	15907.9	11513		YHB1	0.723984	0.0200167	0.0238281	1.21251	0.434498	0.434779
YWP1	2396.09	214.52	2646.29	257.844	385.765	314.039	1	5.53102	19.8539	63.2663	1	100.687	100.84	117.834	73.5107		2617.54	259.243	2646.29	286.141	509.265	756.784	1	6.98453	19.8539	63.2663	1	262.139	310.022	117.834	95.7498		1179.21	9.27948	108.802	174.535		1179.21	34.1907	169.68	365.145		YWP1	0.0289945	0.129497	0.0792483	0.143893	0.161012	0.217156
ZAP1	203.094	791.52	233.292	928.844	204.765	58.0385	10.0004	79.531	63.8539	96.2663	14.1879	32.6868	24.8396	170.834	50.5107		221.863	956.533	233.292	1030.78	270.319	139.864	43.2593	100.431	63.8539	96.2663	53.1425	85.1005	76.3671	170.834	65.7917		475.442	69.1815	78.1698	104.331		475.442	254.902	121.908	218.271		ZAP1	0.536138	0.136942	0.0820707	0.256411	0.144376	0.208093
ZCF20	214.094	442.52	209.292	496.844	214.765	90.0385	11.0004	100.531	90.8539	206.266	49.1879	56.6868	27.8396	214.834	110.511		233.88	534.775	209.292	551.37	283.52	216.979	47.585	126.95	90.8539	206.266	184.239	147.585	85.5903	214.834	143.943		338.303	88.463	179.363	148.123		338.303	325.946	279.723	309.887		ZCF20	0.963473	0.0370697	0.0337003	0.826843	0.144399	0.208093
ZCF3	150.094	114.52	149.292	118.844	182.765	84.0385	61.0004	177.531	111.854	230.266	63.1879	62.6868	51.8396	303.834	106.511		163.965	138.395	149.292	131.886	241.276	202.52	263.872	224.185	111.854	230.266	236.678	163.206	159.376	303.834	138.733		171.222	199.97	210.05	200.648		171.222	736.8	327.58	419.775		ZCF3	4.30317	0.48684	0.235577	1.91319	0.232547	0.282734
ZCF31	81.094	206.52	94.2919	233.844	126.765	64.0385	1	20.531	24.8539	48.2663	10.1879	31.6868	1	1	1		88.5885	249.575	94.2919	259.507	167.348	154.323	1	25.9264	24.8539	48.2663	38.16	82.4969	1	1	1		168.939	17.2601	56.3078	1		168.939	63.5957	87.8139	1		ZCF31	0.376442	0.0109565	0.0150814	0.519797	0.039974	0.0932964
ZCF34	40.094	67.5205	33.2919	80.8437	28.7649	1	1	4.53102	4.85391	1	1	1	1	1	1		43.7994	81.5968	33.2919	89.716	37.9738	2.40985	1	5.72174	4.85391	1	1	1	1	1	1		48.1313	3.85855	1	1		48.1313	14.217	1	1		ZCF34	0.29538	0.0569196	0.0434482	0.0207765	0.0456541	0.0997317
ZCF39	560.094	683.52	621.292	728.844	807.765	396.039	71.0004	366.531	325.854	633.266	192.188	246.687	81.8396	375.834	216.511		611.857	826.017	621.292	808.831	1066.37	954.392	307.13	462.853	325.854	633.266	719.862	642.252	251.608	375.834	282.011		814.792	365.279	665.127	303.151		814.792	1345.89	1037.29	634.222		ZCF39	1.65181	0.00513146	0.00909126	1.27307	0.211805	0.26927
ZCF7	10.094	19.5205	2.29192	19.8437	5.76489	1	1	1	1	1	1	1	1	1	1		11.0268	23.59	2.29192	22.0215	7.61048	2.40985	1	1	1	1	1	1	1	1	1		11.4918	1	1	1		11.4918	1	1	1		ZCF7	0.0870188	0.103336	0.0675181	0.0870188	0.103336	0.166952
ZRT1	1367.09	18363.5	1464.29	20479.8	1250.76	910.039	171	530.531	1057.85	975.266	228.188	268.687	212.84	1524.83	549.511		1493.44	22191.9	1464.29	22727.4	1651.19	2193.05	739.704	669.951	1057.85	975.266	854.704	699.529	654.356	1524.83	715.754		8620.21	822.503	843.167	964.981		8620.21	3030.55	1314.95	2018.84		ZRT1	0.351563	0.263193	0.13946	0.152542	0.26433	0.300614
ZRT2	3436.09	14009.5	3815.29	15876.8	1877.76	901.039	187	681.531	1172.85	1164.27	267.188	320.687	427.84	3487.83	1308.51		3753.65	16930.2	3815.29	17619.3	2478.92	2171.36	808.916	860.633	1172.85	1164.27	1000.78	834.912	1315.35	3487.83	1704.37		7794.77	947.468	999.987	2169.19		7794.77	3490.99	1559.51	4538.15		ZRT2	0.447862	0.164327	0.0927276	0.200072	0.16714	0.221567
orf19.1424	85.094	175.52	113.292	209.844	78.7649	30.0385	2.00043	49.531	22.8539	62.2663	1	13.6868	1	75.834	46.5107		92.9582	212.112	113.292	232.873	103.981	72.3882	8.65335	62.5475	22.8539	62.2663	3.74562	35.6337	3.07441	75.834	60.5816		137.934	31.3516	33.8819	46.4966		137.934	115.516	52.84	97.2755		orf19.1424	0.837474	0.0372293	0.0337003	0.383081	0.041177	0.0932964
orf19.1534	730.094	3166.52	744.292	3451.84	887.765	370.039	36.0004	240.531	418.854	1046.27	197.188	250.687	112.84	777.834	417.511		797.568	3826.66	744.292	3830.67	1171.98	891.736	155.729	303.741	418.854	1046.27	738.59	652.666	346.915	777.834	543.82		1877.15	292.775	812.508	556.19		1877.15	1078.74	1267.13	1163.6		orf19.1534	0.574669	0.124876	0.0769624	0.67503	0.280812	0.309059
orf19.1691	65.094	138.52	41.2919	165.844	51.7649	1	1	1	1	1	1	1	1	1	1		71.1098	167.399	41.2919	184.044	68.3371	2.40985	1	1	1	1	1	1	1	1	1		89.0986	1	1	1		89.0986	1	1	1		orf19.1691	0.0112235	0.0788083	0.0547875	0.0112235	0.0788083	0.14209
orf19.1862	1561.09	1370.52	1832.29	1435.84	828.765	765.039	543	736.531	501.854	440.266	283.188	489.687	346.84	1326.83	686.511		1705.37	1656.24	1832.29	1593.42	1094.09	1843.62	2348.88	930.087	501.854	440.266	1060.71	1274.91	1066.33	1326.83	894.2		1620.84	1260.27	925.295	1095.79		1620.84	4643.53	1443.03	2292.49		orf19.1862	2.8649	0.398343	0.198942	0.890298	0.0201806	0.0685478
orf19.2125	2647.09	4152.52	2939.29	4546.84	2619.76	1426.04	283	1297.53	1012.85	1967.27	555.188	900.687	949.84	3604.83	2321.51		2891.73	5018.22	2939.29	5045.84	3458.46	3436.53	1224.19	1638.51	1012.85	1967.27	2079.52	2344.95	2920.19	3604.83	3023.84		3798.35	1291.85	2130.58	3182.95		3798.35	4759.88	3322.71	6659.05		orf19.2125	1.25315	0.00417871	0.00794422	0.874778	0.0260853	0.0793299
orf19.3615	394.094	556.52	447.292	629.844	513.765	261.039	69.0004	477.531	278.854	451.266	173.188	261.687	76.8396	324.834	234.511		430.515	672.541	447.292	698.967	678.243	629.063	298.478	603.023	278.854	451.266	648.696	681.305	236.236	324.834	305.457		592.77	393.452	593.755	288.842		592.77	1449.69	925.982	604.287		orf19.3615	2.44562	0.0863275	0.0586083	1.56213	0.991228	0.822136
orf19.409	5497.09	3150.52	5863.29	3411.84	5348.76	2837.04	288	2014.53	3154.85	7483.27	1826.19	2401.69	1354.84	2449.83	1983.51		6005.12	3807.33	5863.29	3786.28	7061.13	6836.82	1245.82	2543.94	3154.85	7483.27	6840.2	6252.82	4165.33	2449.83	2583.58		5560	2314.87	6858.76	3066.25		5560	8529.24	10696.5	6414.89		orf19.409	1.53404	0.0105026	0.0147205	1.92383	0.188902	0.244155
orf19.411	319.094	403.52	374.292	451.844	572.765	230.039	1	24.531	93.8539	286.266	74.1879	129.687	51.8396	247.834	167.511		348.584	487.644	374.292	501.432	756.132	554.357	1	30.9776	93.8539	286.266	277.88	337.641	159.376	247.834	218.188		503.74	41.9438	300.596	208.466		503.74	154.544	468.789	436.131		orf19.411	0.306793	0.00130008	0.00451908	0.930617	0.0551933	0.112638
orf19.4174	165.094	289.52	190.292	302.844	321.765	128.039	1	17.531	39.8539	116.266	23.1879	49.6868	6.83962	97.834	36.5107		180.352	349.878	190.292	336.08	424.776	308.553	1	22.1381	39.8539	116.266	86.853	129.36	21.0278	97.834	47.5563		298.322	20.9973	110.827	55.4727		298.322	77.3656	172.838	116.054		orf19.4174	0.259336	0.00194194	0.00503351	0.579367	0.014138	0.0578115
orf19.449	6892.09	4189.52	8012.29	4451.84	6776.76	3306.04	179	1379.53	2606.85	6388.27	1645.19	2416.69	839.84	2437.83	2257.51		7529.04	5062.93	8012.29	4940.42	8946.3	7967.04	774.31	1742.06	2606.85	6388.27	6162.24	6291.87	2582.01	2437.83	2940.47		7076.34	1707.74	6280.79	2653.44		7076.34	6292.25	9795.12	5551.25		orf19.449	0.889196	0.00143936	0.0046326	1.38421	0.452623	0.446133
orf19.4706	574.094	1127.52	606.292	1232.84	846.765	348.039	143	550.531	363.854	581.266	189.188	247.687	101.84	468.834	289.511		627.15	1362.58	606.292	1368.14	1117.85	838.719	618.583	695.207	363.854	581.266	708.625	644.855	313.097	468.834	377.096		986.789	559.215	644.916	386.342		986.789	2060.45	1005.77	808.266		orf19.4706	2.08804	0.089599	0.0598935	1.01923	0.144901	0.208093
orf19.5517	149.094	20.5205	138.292	46.8437	78.7649	20.0385	127	241.531	124.854	54.2663	26.1879	86.6868	35.8396	149.834	13.5107		162.873	24.7985	138.292	51.9847	103.981	48.2897	549.371	305.004	124.854	54.2663	98.0899	225.69	110.186	149.834	17.5981		88.3698	326.41	126.015	92.5392		88.3698	1202.67	196.525	193.601		orf19.5517	13.6095	0.029129	0.0304429	2.2239	0.45084	0.446133
orf19.5626	5825.09	1096.52	6024.29	1207.84	3689.76	2371.04	205	661.531	1581.85	4553.27	786.188	1261.69	655.84	1547.83	1867.51		6363.44	1325.12	6024.29	1340.4	4871.02	5713.84	886.779	835.377	1581.85	4553.27	2944.76	3284.82	2016.32	1547.83	2432.49		4273.02	1101.34	3594.28	1998.88		4273.02	4057.92	5605.4	4181.85		orf19.5626	0.949663	0.0581024	0.0439052	1.31181	0.649322	0.595916
orf19.5848	124.094	211.52	138.292	247.844	234.765	115.039	1	76.531	99.8539	338.266	80.1879	103.687	20.8396	151.834	110.511		135.562	255.617	138.292	275.044	309.923	277.225	1	96.6429	99.8539	338.266	300.353	269.95	64.0695	151.834	143.943		231.944	65.8323	302.856	119.949		231.944	242.562	472.315	250.945		orf19.5848	1.04578	0.0126591	0.0169242	2.03633	0.175254	0.22842
orf19.6578	2718.09	1731.52	3036.29	1974.84	3716.76	2029.04	189	941.531	1514.85	3862.27	962.188	1353.69	779.84	2130.83	2153.51		2969.29	2092.5	3036.29	2191.57	4906.66	4889.67	817.567	1188.96	1514.85	3862.27	3603.99	3524.34	2397.55	2130.83	2805.01		3347.67	1173.79	3663.53	2444.46		3347.67	4324.89	5713.4	5114.06		orf19.6578	1.29191	0.0250512	0.0275563	1.70668	0.688989	0.618988
orf19.6660	352.094	178.52	386.292	175.844	248.765	73.0385	16.0004	156.531	134.854	238.266	62.1879	120.687	36.8396	277.834	84.5107		384.634	215.738	386.292	195.142	328.405	176.012	69.2137	197.666	134.854	238.266	232.932	314.209	113.26	277.834	110.078		281.037	133.911	261.803	167.057		281.037	493.402	408.29	349.5		orf19.6660	1.75565	0.051255	0.0414654	1.4528	0.75895	0.672647
orf19.670.2	20156.1	19107.5	22848.3	21019.8	18914.8	12845	815	5619.53	6904.85	14763.3	4392.19	5363.69	3952.84	11958.8	9113.51		22018.9	23091	22848.3	23326.7	24970.2	30954.6	3525.48	7096.31	6904.85	14763.3	16451.5	13964.4	12152.6	11958.8	11870.6		24534.9	5842.21	15059.7	11994		24534.9	21525.9	23486.1	25092.7		orf19.670.2	0.877357	4.6921e-05	0.000582491	0.957253	0.00225636	0.0233308
ARP3	114.094	273.52	130.292	316.844	106.765	47.0385	6.00043	24.531	19.8539	45.2663	1	6.6868	13.8396	151.834	54.5107		124.638	330.543	130.292	351.616	140.945	113.356	25.9563	30.9776	19.8539	45.2663	1	17.4092	42.5486	151.834	71.0018		198.565	25.5959	21.2252	88.4615		198.565	94.3094	33.1014	185.07		ARP3	0.474955	0.035048	0.0327492	0.166703	0.0327944	0.0872247
CLN3	810.094	1304.52	860.292	1421.84	1048.76	564.039	214	655.531	838.854	2046.27	481.188	683.687	182.84	788.834	579.511		884.961	1576.48	860.292	1577.89	1384.52	1359.25	925.711	827.8	838.854	2046.27	1802.35	1779.99	562.124	788.834	754.83		1273.9	864.122	1876.2	701.929		1273.9	3183.89	2926	1468.5		CLN3	2.49933	0.0735515	0.0516206	2.29689	0.0203301	0.0685478
CMK2	183.094	504.52	189.292	557.844	149.765	86.0385	16.0004	63.531	43.8539	63.2663	2.18792	19.6868	3.83962	122.834	51.5107		200.015	609.7	189.292	619.065	197.711	207.34	69.2137	80.2266	43.8539	63.2663	8.19509	51.2548	11.8046	122.834	67.0942		337.187	64.4314	40.9054	67.2442		337.187	237.4	63.7934	140.682		CMK2	0.704061	0.0715644	0.050975	0.189193	0.0550236	0.112638
YRA1	271.094	579.52	296.292	518.844	287.765	98.0385	19.0004	77.531	84.8539	187.266	40.1879	50.6868	62.8396	368.834	183.511		296.148	700.336	296.292	575.785	379.891	236.258	82.191	97.9057	84.8539	187.266	150.529	131.964	193.195	368.834	239.028		414.118	88.3169	156.586	267.019		414.118	325.407	244.202	558.63		YRA1	0.785784	0.0208949	0.0238917	0.589691	0.0521996	0.110691
orf19.3456	1.09399	39.5205	9.29192	22.8437	6.76489	1	1	1	1	1	1	1	1	1	1		1.19509	47.7595	9.29192	25.3508	8.93063	2.40985	1	1	1	1	1	1	1	1	1		15.823	1	1	1		15.823	1	1	1		orf19.3456	0.0631993	0.207466	0.114106	0.0631993	0.207466	0.265934
Sum	832537	752583	909478	819537	688924	377401	57071.1	195499	246875	583212	155705	224010	141406	434740	333766																		909477	246836	583172	434720
NF	1.09242	1.20848	1	1.10975	1.32014	2.40985	4.32574	1.26279	1	1	3.74562	2.60351	3.07441	1	1.30253																		1	3.68454	1.55953	2.0921
[truncated: 3 more columns]
