# Supplementary material for: Intravital imaging-based genetic screen reveals the transcriptional network governing Candida albicans filamentation during mammalian infection
Source: eLife. 2023 Feb 27;12:e85114. doi: 10.7554/eLife.85114 (PMC9995110; doi:10.7554/eLife.85114)
Supplement: Supplementary file 6. — The gene names; raw nCounter counts for wild type (WT) and the mutant strains; normalized counts; average counts for the strains; counts normalized to WT; fold-change for the gene expression in the mutant relative to WT; the p value calculated using Student’s t test; and the false discovery rate (FDR) calculated using the Benjamini-Yekutieli procedure are provided. Red indicates a gene downregulated by twofold relative to WT with FDR ≤0.1; green indicates a gene upregulated using the same criteria. [file elife-85114-supp6.xlsx]

## Sheet: RPMI+10%Serum-efg1nrg1
Probe Name		Counts after background subtraction										Normalize count - H			Normalize count - efg1			Normalize count-efg1ΔΔ+nrg1ΔΔ				Avg_Individual replicates				Normalize to WT-Avg				Probe name	efg1ΔΔ/WT			efg1ΔΔ nrg1ΔΔ/wt
		WT_H1	WT_H2	WT_H3	efg1ΔΔ	efg1ΔΔ	efg1ΔΔ	efg1ΔΔ nrg1ΔΔ	efg1ΔΔ nrg1ΔΔ	efg1ΔΔ nrg1ΔΔ		WT_H1	WT_H2	WT_H3	efg1ΔΔ	efg1ΔΔ	efg1ΔΔ	efg1ΔΔ nrg1ΔΔ	efg1ΔΔ nrg1ΔΔ	efg1ΔΔ nrg1ΔΔ		Avg_WT	Avg_efg1ΔΔ	Avg_efg1ΔΔ nrg1ΔΔ		WT	efg1ΔΔ	efg1ΔΔ nrg1ΔΔ			FC	T-test	FDR	FC	T-test	FDR
ACE2		261.562	241.277	209.498	122.506	269.598	208.075	233.237	235.35	187.407		289.071	248.485	209.498	163.801	269.598	276.57	305.31	299.456	187.407		249.018	236.656	264.057		249.018	258.835	284.631		ACE2	1.03943	0.788567	0.214503	1.14301	0.753513	0.477079
ACS1		19954.6	21972.3	19044.5	2248.51	3670.6	2427.07	2091.24	2036.35	11663.4		22053.2	22628.6	19044.5	3006.43	3670.6	3226.03	2737.45	2591.02	11663.4		21242.1	3301.02	5663.96		21242.1	3610.39	6105.25		ACS1	0.169964	9.14403e-05	0.000140355	0.287413	0.00822363	0.0151789
ACS2		2689.56	2871.28	2835.5	3019.51	4294.6	3371.07	7897.24	8036.35	4790.41		2972.42	2957.05	2835.5	4037.32	4294.6	4480.78	10337.6	10225.3	4790.41		2921.66	4270.9	8451.1		2921.66	4671.17	9109.55		ACS2	1.59881	0.000573971	0.000424075	3.11794	0.0391762	0.0479358
ADH5		15924.6	17451.3	21201.5	9128.51	10263.6	7095.07	1587.24	1610.35	10647.4		17599.3	17972.6	21201.5	12205.5	10263.6	9430.66	2077.71	2048.99	10647.4		18924.5	10633.3	4924.7		18924.5	11629.8	5308.4		ADH5	0.614538	0.00416257	0.00204009	0.280504	0.010471	0.0186934
AHR1		711.562	709.277	538.498	265.506	536.598	435.075	658.237	706.35	544.407		786.397	730.465	538.498	355.003	536.598	578.295	861.638	898.75	544.407		685.12	489.965	768.265		685.12	535.884	828.122		AHR1	0.782176	0.127306	0.0422928	1.20873	0.571823	0.384392
ALS1		11885.6	12346.3	15774.5	61.5064	137.598	113.075	489.237	526.35	5655.41		13135.6	12715.1	15774.5	82.239	137.598	150.297	640.416	669.72	5655.41		13875.1	123.378	2321.85		13875.1	134.941	2502.75		ALS1	0.00972544	0.000136676	0.000172136	0.180378	0.00385811	0.00919739
ALS2		78.5622	93.277	125.498	566.506	766.598	613.075	108.237	127.35	170.407		86.8246	96.0634	125.498	757.465	766.598	814.89	141.683	162.038	170.407		102.795	779.651	158.043		102.795	852.719	170.356		ALS2	8.29532	5.83696e-06	3.8288e-05	1.65724	0.0187099	0.0281165
ALS3		25020.6	25896.3	20372.5	115.506	272.598	154.075	17408.2	18669.4	31129.4		27652	26669.9	20372.5	154.441	272.598	204.794	22787.5	23754.6	31129.4		24898.1	210.611	25890.5		24898.1	230.349	27907.7		ALS3	0.00925168	0.000413277	0.000346752	1.12088	0.789916	0.492475
ALS4		365.562	369.277	260.498	928.506	1024.6	926.075	360.237	365.35	689.407		404.008	380.308	260.498	1241.49	1024.6	1230.92	471.554	464.866	689.407		348.271	1165.67	541.942		348.271	1274.92	584.166		ALS4	3.6607	0.000607794	0.000424724	1.67733	0.0877039	0.0918361
ALS5		137.562	175.277	121.498	66.5064	199.598	153.075	71.2372	82.35	49.4065		152.03	180.513	121.498	88.9244	199.598	203.465	93.2501	104.781	49.4065		151.347	163.996	82.4792		151.347	179.365	88.9054		ALS5	1.18513	0.774348	0.214135	0.587429	0.0453648	0.0548914
ALS6		5.56224	18.277	1	1	22.5982	5.07474	1	1	1		6.14722	18.823	1	1	22.5982	6.74527	1	1	1		8.65674	10.1145	1		8.65674	11.0624	1		ALS6	1.2779	0.869921	0.232763	0.115517	0.221761	0.185768
ALS7		501.562	486.277	528.498	5858.51	9852.6	6747.07	434.237	436.35	506.407		554.312	500.803	528.498	7833.29	9852.6	8968.11	568.42	555.205	506.407		527.871	8884.67	543.344		527.871	9717.33	585.678		ALS7	18.4085	0.000139137	0.000172136	1.10951	0.560115	0.379519
ALS9		45.5622	50.277	1	15.5064	110.598	73.0747	58.2372	57.35	37.4065		50.354	51.7789	1	20.7333	110.598	97.1298	76.233	72.9713	37.4065		34.3776	76.1538	62.2036		34.3776	83.2908	67.0501		ALS9	2.42282	0.269059	0.0848306	1.9504	0.252261	0.203491
AOX2		1981.56	2145.28	2303.5	358.506	882.598	386.075	61.2372	66.35	297.407		2189.96	2209.36	2303.5	479.352	882.598	513.165	80.16	84.4228	297.407		2234.27	625.038	153.996		2234.27	683.616	165.995		AOX2	0.305968	0.000274188	0.000256092	0.0742947	1.28834e-05	0.000229115
ARG1		438.562	464.277	484.498	187.506	217.598	289.075	74.2372	59.35	114.407		484.686	478.146	484.498	250.711	217.598	384.234	97.1771	75.5161	114.407		482.443	284.181	95.6999		482.443	310.814	103.156		ARG1	0.64425	0.0177016	0.00700983	0.21382	4.59004e-06	0.000229115
ARG81		192.562	215.277	172.498	246.506	485.598	324.075	172.237	161.35	232.407		212.814	221.708	172.498	329.599	485.598	430.755	225.46	205.299	232.407		202.34	415.317	221.055		202.34	454.241	238.278		ARG81	2.24494	0.0114685	0.00485206	1.17761	0.337338	0.253353
BCR1		702.562	731.277	720.498	439.506	805.598	649.075	594.237	627.35	574.407		776.451	753.122	720.498	587.655	805.598	862.74	777.862	798.231	574.407		750.023	751.998	716.833		750.023	822.474	772.684		BCR1	1.0966	0.982654	0.258731	1.03021	0.674062	0.439639
BRG1		2178.56	2446.28	3135.5	273.506	403.598	376.075	1341.24	1333.35	891.407		2407.68	2519.35	3135.5	365.7	403.598	499.873	1755.69	1696.54	891.407		2687.51	423.057	1447.88		2687.51	462.705	1560.69		BRG1	0.172169	0.000594893	0.000424724	0.580718	0.0259948	0.0345224
CAP1		717.562	807.277	657.498	491.506	841.598	525.075	330.237	361.35	742.407		793.028	831.392	657.498	657.184	841.598	697.921	432.283	459.777	742.407		760.639	732.234	544.822		760.639	800.859	587.271		CAP1	1.05288	0.730506	0.204294	0.772075	0.12694	0.122653
CAT1		1815.56	1965.28	1782.5	79.5064	263.598	103.075	258.237	285.35	893.407		2006.5	2023.98	1782.5	106.306	263.598	137.005	338.035	363.075	893.407		1937.66	168.97	531.506		1937.66	184.806	572.917		CAT1	0.0953756	4.21139e-05	9.0628e-05	0.295674	0.00204049	0.00600567
CDC10		163.562	202.277	143.498	344.506	470.598	289.075	674.237	636.35	356.407		180.764	208.319	143.498	460.633	470.598	384.234	882.582	809.683	356.407		177.527	438.488	682.89		177.527	479.583	736.096		CDC10	2.70146	0.00140268	0.000826591	4.14639	0.0380064	0.0470329
CDR1		3178.56	3347.28	3967.5	788.506	1368.6	997.075	1454.24	1425.35	2001.41		3512.85	3447.27	3967.5	1054.3	1368.6	1325.3	1903.61	1813.59	2001.41		3642.54	1249.4	1906.2		3642.54	1366.49	2054.72		CDR1	0.375147	0.000232812	0.000249712	0.56409	0.000545892	0.00258468
CDR2		24.5622	24.277	1	1	37.5982	2.07474	5.23721	2.35002	4.40654		27.1455	25.0022	1	1	37.5982	2.75771	6.85555	2.99013	4.40654		17.7159	13.7853	4.75074		17.7159	15.0773	5.12088		CDR2	0.851058	0.800669	0.216575	0.289056	0.200012	0.175656
CHT2		2718.56	2843.28	3098.5	3937.51	5603.6	4308.07	4584.24	4719.35	3832.41		3004.47	2928.21	3098.5	5264.76	5603.6	5726.23	6000.81	6004.83	3832.41		3010.39	5531.53	5279.35		3010.39	6049.94	5690.68		CHT2	2.00968	6.6941e-05	0.000127748	1.89034	0.0352205	0.044599
CHT3		772.562	939.277	650.498	1895.51	2413.6	2185.07	690.237	763.35	493.407		853.813	967.335	650.498	2534.44	2413.6	2904.37	903.526	971.276	493.407		823.882	2617.47	789.403		823.882	2862.78	850.907		CHT3	3.47474	0.000503139	0.000395293	1.0328	0.854002	0.519558
CIT1		16859.6	17534.3	19110.5	1440.51	3570.6	1948.07	8028.24	8313.35	12108.4		18632.7	18058.1	19110.5	1926.07	3570.6	2589.35	10509	10577.8	12108.4		18600.4	2695.34	11065.1		18600.4	2947.95	11927.2		CIT1	0.158488	9.5644e-06	4.1161e-05	0.641232	0.000237766	0.00161829
CPH1		304.562	319.277	409.498	98.5064	209.598	152.075	509.237	553.35	317.407		336.593	328.815	409.498	131.711	209.598	202.135	666.596	704.075	317.407		358.302	181.148	562.692		358.302	198.125	606.533		CPH1	0.552956	0.00770913	0.00340715	1.6928	0.179469	0.160199
CPH2		1358.56	1387.28	1337.5	1699.51	2462.6	1659.07	1252.24	1276.35	1437.41		1501.44	1428.72	1337.5	2272.38	2462.6	2205.22	1639.19	1624.01	1437.41		1422.55	2313.4	1566.87		1422.55	2530.21	1688.95		CPH2	1.77864	0.000597382	0.000424724	1.18727	0.146965	0.14039
CRH11		1167.56	1266.28	1084.5	1996.51	2380.6	1528.07	811.237	918.35	1141.41		1290.35	1304.1	1084.5	2669.49	2380.6	2031.09	1061.92	1168.5	1141.41		1226.32	2360.39	1123.94		1226.32	2581.61	1211.51		CRH11	2.10517	0.00457977	0.00220097	0.987923	0.259013	0.205887
CSA1		9499.56	9951.28	11636.5	5616.51	6140.6	4482.07	16271.2	16510.4	12667.4		10498.6	10248.5	11636.5	7509.72	6140.6	5957.5	21299.2	21007.5	12667.4		10794.6	6535.94	18324.7		10794.6	7148.48	19752.4		CSA1	0.66223	0.00280353	0.00146077	1.82985	0.0581179	0.0666214
CSH1		1233.56	1382.28	1399.5	1392.51	2236.6	1472.07	2392.24	2455.35	4466.41		1363.3	1423.57	1399.5	1861.89	2236.6	1956.66	3131.46	3124.15	4466.41		1395.45	2018.38	3574.01		1395.45	2207.54	3852.47		CSH1	1.58195	0.00542729	0.00255858	2.76073	0.00816861	0.0151789
DAK2		1037.56	1215.28	1145.5	3515.51	3874.6	3178.07	825.237	871.35	1598.41		1146.68	1251.58	1145.5	4700.51	3874.6	4224.25	1080.24	1108.69	1598.41		1181.25	4266.45	1262.45		1181.25	4666.3	1360.81		DAK2	3.9503	0.000217836	0.00024189	1.152	0.661156	0.436363
DDR48		10279.6	11521.3	8854.5	1	48.5982	31.0747	1149.24	1173.35	16229.4		11360.7	11865.4	8854.5	1	48.5982	41.3041	1504.36	1492.95	16229.4		10693.5	30.3008	6408.91		10693.5	33.1405	6908.24		DDR48	0.00309912	0.000331773	0.000288142	0.646021	0.439599	0.310859
DFG5		521.562	584.277	425.498	624.506	840.598	577.075	646.237	659.35	850.407		576.415	601.731	425.498	835.015	840.598	767.039	845.93	838.947	850.407		534.548	814.217	845.095		534.548	890.525	910.938		DFG5	1.66594	0.00951397	0.00416764	1.70413	0.00488175	0.0106324
ECE1		58600.6	62013.3	60486.5	1	1	1	20268.2	20615.4	34172.4		64763.6	63865.8	60486.5	1	1	1	26531.3	26230.7	34172.4		63038.6	1	28978.1		63038.6	1.09372	31235.9		ECE1	1.735e-05	1.08921e-06	3.7363e-05	0.495504	0.000303303	0.00183498
ECM331		1054.56	1166.28	822.498	460.506	650.598	592.075	226.237	233.35	336.407		1165.47	1201.12	822.498	615.734	650.598	786.977	296.146	296.911	336.407		1063.03	684.436	309.821		1063.03	748.581	333.96		ECM331	0.704197	0.0450848	0.0164095	0.31416	0.00343653	0.0087032
EFG1		1646.56	1753.28	2407.5	1	1	1	1	1	1		1819.73	1805.65	2407.5	1	1	1	1	1	1		2010.96	1	1		2010.96	1.09372	1		EFG1	0.000543879	0.000533473	0.000409875	0.000497275	0.000533473	0.00258468
ELF1		1057.56	1059.28	1230.5	301.506	432.598	469.075	589.237	580.35	265.407		1168.79	1090.92	1230.5	403.138	432.598	623.487	771.317	738.429	265.407		1163.4	486.408	591.717		1163.4	531.993	637.82		ELF1	0.457274	0.00106877	0.000669691	0.548237	0.0273812	0.0354978
ENA2		2798.56	2755.28	3196.5	1145.51	2437.6	1438.07	1841.24	1951.35	1518.41		3092.89	2837.58	3196.5	1531.63	2437.6	1911.47	2410.2	2482.87	1518.41		3042.32	1960.23	2137.16		3042.32	2143.94	2303.67		ENA2	0.704706	0.0188261	0.00739597	0.757207	0.0508299	0.0595202
ENA21		6191.56	6624.28	6962.5	1685.51	2679.6	1994.07	4780.24	4785.35	6399.41		6842.73	6822.16	6962.5	2253.66	2679.6	2650.49	6257.37	6088.81	6399.41		6875.8	2527.92	6248.53		6875.8	2764.83	6735.37		ENA21	0.402111	7.20376e-06	3.9622e-05	0.979577	0.00328079	0.0087032
FAV2		176.562	193.277	182.498	1	10.5982	1.07474	57.2372	66.35	32.4065		195.131	199.051	182.498	1.33708	10.5982	1.42853	74.924	84.4228	32.4065		192.226	4.45461	63.9178		192.226	4.87209	68.8978		FAV2	0.0253456	5.66788e-06	3.8288e-05	0.35842	0.00156241	0.00531709
FBP1		6480.56	7211.28	9464.5	2847.51	5663.6	3267.07	3076.24	3010.35	5441.41		7162.12	7426.69	9464.5	3807.34	5663.6	4342.55	4026.82	3830.33	5441.41		8017.77	4604.5	4432.85		8017.77	5036.02	4778.23		FBP1	0.628108	0.0201395	0.00784965	0.595954	0.0155775	0.0260983
FDH1		3535.56	3828.28	3677.5	12601.5	20363.6	12417.1	415.237	416.35	4157.41		3907.4	3942.64	3677.5	16849.2	20363.6	16504.6	543.549	529.758	4157.41		3842.51	17905.8	1743.57		3842.51	19583.9	1879.42		FDH1	5.09665	0.000339978	0.000290172	0.489112	0.157763	0.149395
FGR15		177.562	225.277	209.498	197.506	362.598	295.075	177.237	204.35	184.407		196.236	232.007	209.498	264.082	362.598	392.209	232.005	260.012	184.407		212.58	339.63	225.475		212.58	371.459	243.042		FGR15	1.74738	0.033942	0.0128254	1.1433	0.625327	0.415232
FKH2		149.562	165.277	174.498	262.506	425.598	248.075	234.237	204.35	225.407		165.292	170.214	174.498	350.992	425.598	329.737	306.619	260.012	225.407		170.001	368.776	264.012		170.001	403.337	284.582		FKH2	2.37256	0.00242951	0.00132154	1.674	0.0165352	0.0265995
FRP1		3956.56	4152.28	5663.5	4595.51	6337.6	5235.07	1629.24	1593.35	3488.41		4372.67	4276.31	5663.5	6144.56	6337.6	6958.38	2132.69	2027.36	3488.41		4770.83	6480.18	2549.48		4770.83	7087.5	2748.12		FRP1	1.48559	0.0285523	0.0109561	0.576026	0.0267239	0.0350631
FRP2		7071.56	7331.28	7562.5	2599.51	3827.6	3077.07	3459.24	3558.35	3050.41		7815.28	7550.28	7562.5	3475.75	3827.6	4090	4528.17	4527.59	3050.41		7642.68	3797.78	4035.39		7642.68	4153.71	4349.8		FRP2	0.543488	4.12924e-05	9.0628e-05	0.569145	0.0019573	0.00600567
FRP3		6535.56	7452.28	8470.5	1656.51	2939.6	1680.07	1305.24	1310.35	5640.41		7222.91	7674.89	8470.5	2214.88	2939.6	2233.13	1708.57	1667.27	5640.41		7789.43	2462.54	3005.41		7789.43	2693.32	3239.57		FRP3	0.345766	0.000257172	0.000254628	0.415894	0.0249091	0.0334889
FTR1		5267.56	5503.28	7165.5	9121.51	9714.6	9012.07	15285.2	15747.4	15140.4		5821.55	5667.67	7165.5	12196.2	9714.6	11978.7	20008.5	20036.7	15140.4		6218.24	11296.5	18395.2		6218.24	12355.2	19828.4		FTR1	1.98693	0.00536564	0.00255382	3.18875	0.00199095	0.00600567
GAL1		1927.56	2074.28	1791.5	3647.51	6505.6	3700.07	2608.24	2655.35	3223.41		2130.28	2136.24	1791.5	4877.01	6505.6	4918.08	3414.2	3378.63	3223.41		2019.34	5433.56	3338.75		2019.34	5942.79	3598.88		GAL1	2.94294	0.00338316	0.00170886	1.7822	0.000501378	0.00258468
GAL4		1035.56	1124.28	1141.5	932.506	1120.6	901.075	1379.24	1352.35	2126.41		1144.47	1157.86	1141.5	1246.84	1120.6	1197.69	1805.43	1720.71	2126.41		1147.94	1188.38	1884.18		1147.94	1299.75	2030.99		GAL4	1.13224	0.336833	0.103561	1.76924	0.00399403	0.00925425
GAP2		1760.56	2072.28	1936.5	721.506	2094.6	1125.07	1323.24	1296.35	2365.41		1945.72	2134.18	1936.5	964.712	2094.6	1495.43	1732.13	1649.46	2365.41		2005.47	1518.25	1915.66		2005.47	1660.54	2064.92		GAP2	0.828005	0.216889	0.0701699	1.02965	0.721939	0.465202
GCA2		443.562	461.277	299.498	339.506	600.598	363.075	119.237	105.35	579.407		490.212	475.056	299.498	453.947	600.598	482.593	156.083	134.046	579.407		421.589	512.38	289.845		421.589	560.399	312.428		GCA2	1.32926	0.297638	0.0932472	0.741072	0.449456	0.313755
GCN4		1726.56	1743.28	1281.5	1189.51	1465.6	1267.07	2715.24	2898.35	1900.41		1908.14	1795.35	1281.5	1590.47	1465.6	1684.18	3554.27	3687.82	1900.41		1661.66	1580.08	3047.5		1661.66	1728.16	3284.94		GCN4	1.04002	0.70828	0.200342	1.97689	0.084263	0.0899631
GIS2		2792.56	2882.28	3020.5	3205.51	4370.6	3111.07	2476.24	2621.35	3351.41		3086.26	2968.38	3020.5	4286.02	4370.6	4135.19	3241.42	3335.37	3351.41		3025.04	4263.94	3309.4		3025.04	4663.55	3567.24		GIS2	1.54165	8.65184e-05	0.000138153	1.17924	0.00418458	0.00949377
GNP1		6656.56	7244.28	9139.5	4778.51	6465.6	3823.07	7536.24	7638.35	2228.41		7356.63	7460.68	9139.5	6389.25	6465.6	5081.57	9865	9718.93	2228.41		7985.6	5978.81	7270.78		7985.6	6539.13	7837.26		GNP1	0.818865	0.0517816	0.0187094	0.981424	0.795986	0.492516
GPD2		7142.56	7414.28	9552.5	914.506	885.598	903.075	2481.24	2688.35	1080.41		7893.75	7635.76	9552.5	1222.77	885.598	1200.35	3247.96	3420.62	1080.41		8360.67	1102.91	2583		8360.67	1206.27	2784.24		GPD2	0.144279	0.000286426	0.00026145	0.333017	0.00388503	0.00919739
HAC1		1576.56	1683.28	1706.5	1210.51	1819.6	1502.07	1536.24	1680.35	1874.41		1742.37	1733.56	1706.5	1618.54	1819.6	1996.53	2010.95	2138.05	1874.41		1727.48	1811.56	2007.8		1727.48	1981.34	2164.24		HAC1	1.14695	0.486206	0.141572	1.25283	0.0218482	0.0313062
HAP2		1074.56	1095.28	1277.5	723.506	1140.6	753.075	874.237	844.35	796.407		1187.57	1128	1277.5	967.386	1140.6	1000.98	1144.38	1074.34	796.407		1197.69	1036.32	1005.04		1197.69	1133.44	1083.35		HAP2	0.946358	0.0782036	0.0268825	0.904533	0.168634	0.155416
HAP3		185.562	138.277	231.498	240.506	478.598	324.075	188.237	210.35	281.407		205.078	142.408	231.498	321.576	478.598	430.755	246.404	267.646	281.407		192.994	410.31	265.152		192.994	448.764	285.811		HAP3	2.32527	0.0152775	0.00619866	1.48093	0.063395	0.0714207
HAP43		1193.56	1317.28	1444.5	922.506	1526.6	1369.07	1721.24	1651.35	1226.41		1319.09	1356.63	1444.5	1233.47	1526.6	1819.75	2253.11	2101.15	1226.41		1373.4	1526.61	1860.22		1373.4	1669.68	2005.16		HAP43	1.21572	0.426567	0.127199	1.45999	0.205198	0.17735
HEM1		391.562	385.277	377.498	196.506	254.598	189.075	327.237	358.35	255.407		432.743	396.786	377.498	262.745	254.598	251.315	428.356	455.959	255.407		402.342	256.219	379.907		402.342	280.232	409.507		HEM1	0.696502	0.000906331	0.000598158	1.01781	0.746672	0.475512
HGT7		4365.56	4558.28	3357.5	100936	86173.6	87266.1	16298.2	16616.4	20176.4		4824.69	4694.44	3357.5	134959	86173.6	115993	21334.5	21142.4	20176.4		4292.21	112375	20884.4		4292.21	122907	22511.6		HGT7	28.6348	0.00160191	0.000932871	5.24476	9.52007e-06	0.000229115
HOG1		1086.56	1278.28	1244.5	1099.51	1771.6	1260.07	1483.24	1542.35	1643.41		1200.84	1316.46	1244.5	1470.13	1771.6	1674.87	1941.57	1962.46	1643.41		1253.93	1638.87	1849.15		1253.93	1792.46	1993.22		HOG1	1.42947	0.0154771	0.00622859	1.58958	0.00536368	0.011453
HSP104		1900.56	2106.28	2849.5	1778.51	2873.6	1564.07	2166.24	2230.35	2120.41		2100.44	2169.2	2849.5	2378.01	2873.6	2078.94	2835.62	2837.87	2120.41		2373.05	2443.52	2597.97		2373.05	2672.52	2800.38		HSP104	1.1262	0.842714	0.226708	1.18008	0.542038	0.371245
HSP70		6626.56	7344.28	10138.5	4847.51	8956.6	4284.07	4795.24	4784.35	997.407		7323.48	7563.67	10138.5	6481.51	8956.6	5694.33	6277.01	6087.54	997.407		8341.88	7044.14	4453.98		8341.88	7704.31	4801.01		HSP70	0.92357	0.385516	0.115655	0.57553	0.116916	0.115747
HTA1		8586.56	9399.28	7443.5	22614.5	34379.6	25156.1	11536.2	12110.4	21144.4		9489.61	9680.05	7443.5	30237.4	34379.6	33437.1	15101	15409	21144.4		8871.05	32684.7	17218.2		8871.05	35747.9	18559.7		HTA1	4.02972	7.90692e-05	0.000134964	2.09216	0.0162512	0.0265995
HTA2		4982.56	5487.28	4353.5	12177.5	18607.6	13561.1	6776.24	7106.35	11758.4		5506.58	5651.19	4353.5	16282.3	18607.6	18025.2	8870.15	9042.02	11758.4		5170.42	17638.4	9890.19		5170.42	19291.4	10660.8		HTA2	3.73111	0.00010409	0.000147227	2.06187	0.00988021	0.0179326
HWP1		37835.6	38984.3	31967.5	1	1	1	65145.2	67393.4	37238.4		41814.7	40148.8	31967.5	1	1	1	85275.7	85750.3	37238.4		37977	1	69421.5		37977	1.09372	74830.3		HWP1	2.87995e-05	0.000237114	0.000249712	1.97041	0.127271	0.122653
HYR1		1312.56	1430.28	1637.5	1	38.5982	16.0747	345.237	320.35	726.407		1450.6	1473	1637.5	1	38.5982	21.3663	451.918	407.609	726.407		1520.37	20.3215	528.645		1520.37	22.226	569.833		HYR1	0.0146188	1.51093e-05	4.6181e-05	0.374799	0.00102125	0.00427747
IFD6		238.562	270.277	188.498	388.506	544.598	409.075	178.237	179.35	177.407		263.652	278.351	188.498	519.464	544.598	543.736	233.314	228.202	177.407		243.5	535.933	212.974		243.5	586.16	229.568		IFD6	2.40723	0.000545604	0.000409875	0.942783	0.408047	0.290524
IHD1		9368.56	10248.3	11705.5	1	1	1	8036.24	8019.35	5241.41		10353.9	10554.4	11705.5	1	1	1	10519.5	10203.7	5241.41		10871.3	1	8654.87		10871.3	1.09372	9329.2		IHD1	0.000100606	1.33808e-05	4.5606e-05	0.858153	0.27646	0.213908
INO4		296.562	299.277	292.498	267.506	564.598	352.075	291.237	295.35	395.407		327.752	308.217	292.498	357.678	564.598	467.972	381.232	375.799	395.407		309.489	463.416	384.146		309.489	506.847	414.076		INO4	1.63769	0.0640905	0.0224999	1.33793	0.00314721	0.00856827
IRE1		244.562	286.277	192.498	554.506	804.598	563.075	380.237	389.35	413.407		270.283	294.829	192.498	741.42	804.598	748.43	497.734	495.403	413.407		252.536	764.816	468.848		252.536	836.494	505.377		IRE1	3.31237	0.000153728	0.000185565	2.00121	0.00644802	0.0125648
IRO1		746.562	802.277	994.498	284.506	500.598	321.075	1179.24	1070.35	1997.41		825.078	826.243	994.498	380.408	500.598	426.768	1543.63	1361.9	1997.41		881.94	435.925	1634.31		881.94	476.779	1761.65		IRO1	0.540603	0.00253953	0.00133729	1.99747	0.0188476	0.0281165
KIP4		998.562	973.277	1143.5	563.506	698.598	632.075	1265.24	1316.35	1019.41		1103.58	1002.35	1143.5	753.453	698.598	840.144	1656.21	1674.9	1019.41		1083.14	764.065	1450.17		1083.14	835.673	1563.16		KIP4	0.771526	0.00560723	0.00261846	1.44317	0.16983	0.155416
KRE1		1103.56	1153.28	1033.5	45.5064	223.598	167.075	1730.24	1830.35	552.407		1219.62	1187.73	1033.5	60.8457	223.598	222.073	2264.9	2328.91	552.407		1146.95	168.839	1715.4		1146.95	184.662	1849.06		KRE1	0.161003	0.000242872	0.000250491	1.61215	0.38594	0.278337
MAC1		120.562	123.277	108.498	1	82.5982	59.0747	171.237	155.35	75.4065		133.242	126.96	108.498	1	82.5982	78.5212	224.151	197.665	75.4065		122.9	54.0398	165.741		122.9	59.1044	178.654		MAC1	0.480916	0.0669037	0.023159	1.45366	0.408175	0.290524
MAE1		612.562	678.277	794.498	1005.51	1695.6	1136.07	4635.24	4822.35	2571.41		676.985	698.539	794.498	1344.44	1695.6	1510.05	6067.57	6135.89	2571.41		723.341	1516.7	4924.95		723.341	1658.84	5308.67		MAE1	2.29331	0.00180728	0.00104025	7.3391	0.023412	0.0318695
MBF1		3789.56	4302.28	4435.5	3209.51	4923.6	3716.07	4614.24	4540.35	5842.41		4188.11	4430.8	4435.5	4291.37	4923.6	4939.35	6040.08	5777.08	5842.41		4351.47	4718.11	5886.52		4351.47	5160.28	6345.15		MBF1	1.18587	0.18389	0.0599688	1.45816	0.000174071	0.00126725
MDM34		2819.56	3280.28	3006.5	1639.51	3977.6	1905.07	440.237	439.35	1469.41		3116.1	3378.27	3006.5	2192.15	3977.6	2532.2	576.274	559.023	1469.41		3166.95	2900.65	868.234		3166.95	3172.49	935.881		MDM34	1.00175	0.658287	0.188354	0.295515	0.00199438	0.00600567
MET28		1122.56	1142.28	1064.5	512.506	821.598	573.075	1398.24	1484.35	1276.41		1240.62	1176.4	1064.5	685.262	821.598	761.722	1830.3	1888.67	1276.41		1160.51	756.194	1665.13		1160.51	827.064	1794.86		MET28	0.712675	0.00337078	0.00170886	1.54662	0.0666901	0.0741077
NDT80		1060.56	1138.28	1262.5	627.506	1046.6	967.075	1174.24	1198.35	252.407		1172.1	1172.28	1262.5	839.026	1046.6	1285.42	1537.09	1524.76	252.407		1202.29	1057.02	1104.75		1202.29	1156.08	1190.83		NDT80	0.961561	0.334256	0.103411	0.990463	0.83061	0.508165
NPR1		285.562	327.277	299.498	217.506	395.598	247.075	514.237	507.35	498.407		315.595	337.054	299.498	290.824	395.598	328.408	673.141	645.545	498.407		317.382	338.277	605.697		317.382	369.98	652.889		NPR1	1.16572	0.555504	0.159869	2.05711	0.00646123	0.0125648
NRG1		1273.56	1326.28	1184.5	2346.51	2960.6	2759.07	1	1	1		1407.5	1365.9	1184.5	3137.47	2960.6	3667.32	1	1	1		1319.3	3255.13	1		1319.3	3560.2	1		NRG1	2.69855	0.000970736	0.000624021	0.000757978	4.28683e-05	0.000511365
PCK1		21033.6	23655.3	24151.5	3912.51	8851.6	3779.07	5845.24	5999.35	8290.41		23245.7	24361.9	24151.5	5231.34	8851.6	5023.09	7651.47	7633.49	8290.41		23919.7	6368.67	7858.45		23919.7	6965.54	8470.73		PCK1	0.291205	0.000168577	0.000198707	0.354132	2.4131e-06	0.000229115
PES1		125.562	131.277	176.498	1	45.5982	21.0747	28.2372	35.35	25.4065		138.768	135.199	176.498	1	45.5982	28.0122	36.9627	44.9789	25.4065		150.155	24.8701	35.7827		150.155	27.201	38.5706		PES1	0.181153	0.00248795	0.00133661	0.256873	0.001354	0.00480621
PFK2		1211.56	1310.28	1171.5	8417.51	7373.6	6995.07	3163.24	3361.35	5535.41		1338.98	1349.42	1171.5	11254.9	7373.6	9297.75	4140.7	4276.93	5535.41		1286.63	9308.74	4651.01		1286.63	10181.1	5013.39		PFK2	7.91302	0.00202416	0.00113861	3.89652	0.00167786	0.00553694
PGA13		333.562	347.277	343.498	1	28.5982	14.0747	827.237	854.35	584.407		368.643	357.651	343.498	1	28.5982	18.7079	1082.86	1087.06	584.407		356.597	16.1021	918.11		356.597	17.6111	989.642		PGA13	0.0493866	6.18791e-06	3.8288e-05	2.77524	0.028251	0.0361945
PGA17		297.562	293.277	343.498	1	5.59823	8.07474	51.2372	59.35	894.407		328.857	302.038	343.498	1	5.59823	10.7328	67.0699	75.5161	894.407		324.797	5.77702	345.664		324.797	6.31843	372.596		PGA17	0.0194535	1.38234e-05	4.5606e-05	1.14716	0.943087	0.558164
PGA25		181.562	175.277	200.498	1	12.5982	7.07474	27.2372	20.35	571.407		200.657	180.513	200.498	1	12.5982	9.40364	35.6537	25.8931	571.407		193.889	7.66729	210.984		193.889	8.38586	227.423		PGA25	0.0432508	1.58645e-05	4.6181e-05	1.17295	0.929044	0.552857
PGA34		949.562	968.277	944.498	1613.51	2471.6	1650.07	1639.24	1666.35	475.407		1049.43	997.202	944.498	2157.39	2471.6	2193.25	2145.78	2120.24	475.407		997.042	2274.08	1580.47		997.042	2487.2	1703.61		PGA34	2.49458	0.000250914	0.00025346	1.70867	0.35124	0.261986
PGA37		310.562	328.277	394.498	1	69.5982	28.0747	54.2372	57.35	101.407		343.224	338.083	394.498	1	69.5982	37.3165	70.997	72.9713	101.407		358.602	35.9716	81.7916		358.602	39.3428	88.1642		PGA37	0.109712	0.000272018	0.000256092	0.245856	0.000174552	0.00126725
PGA48		1869.56	1877.28	1563.5	3013.51	4173.6	2890.07	941.237	1034.35	2032.41		2066.18	1933.36	1563.5	4029.3	4173.6	3841.44	1232.09	1316.09	2032.41		1854.35	4014.78	1526.86		1854.35	4391.04	1645.82		PGA48	2.36797	0.000267365	0.000256092	0.88755	0.329371	0.249087
PGA53		1436.56	1489.28	1831.5	781.506	822.598	786.075	9924.24	10054.4	9128.41		1587.65	1533.77	1831.5	1044.94	822.598	1044.84	12990.9	12793	9128.41		1650.97	970.791	11637.4		1650.97	1061.77	12544.1		PGA53	0.643121	0.0044689	0.00216873	7.59805	0.00136816	0.00480621
PGA7		6483.56	6927.28	8266.5	5142.51	6394.6	5792.07	5783.24	5810.35	6097.41		7165.44	7134.21	8266.5	6875.94	6394.6	7698.74	7570.31	7393.01	6097.41		7522.05	6989.76	7020.24		7522.05	7644.83	7567.21		PGA7	1.01632	0.374106	0.112916	1.006	0.446578	0.313755
PHO89		4094.56	4448.28	2810.5	2241.51	2770.6	2080.07	2680.24	2809.35	4296.41		4525.19	4581.16	2810.5	2997.07	2770.6	2764.8	3508.45	3574.58	4296.41		3972.28	2844.16	3793.15		3972.28	3110.71	4088.68		PHO89	0.783104	0.126584	0.0422928	1.0293	0.791397	0.492475
PHR1		4722.56	4863.28	7594.5	3237.51	3797.6	2797.07	8470.24	8662.35	3517.41		5219.23	5008.55	7594.5	4328.81	3797.6	3717.83	11087.6	11021.8	3517.41		5940.76	3948.08	8542.29		5940.76	4318.09	9207.84		PHR1	0.726858	0.0792381	0.0270502	1.54994	0.381141	0.276709
PHR2		278.562	264.277	238.498	21.5064	77.5982	58.0747	1	14.35	42.4065		307.859	272.172	238.498	28.7558	77.5982	77.1921	1	18.2588	42.4065		272.843	61.182	20.5551		272.843	66.9159	22.1566		PHR2	0.245255	0.00119693	0.000731439	0.0812065	0.000416206	0.00238552
PIL1		12218.6	13150.3	13320.5	8775.51	12588.6	9156.07	5594.24	5684.35	15127.4		13503.6	13543.1	13320.5	11733.6	12588.6	12170.1	7322.9	7232.69	15127.4		13455.7	12164.1	9894.33		13455.7	13304.1	10665.2		PIL1	0.988731	0.00727371	0.00324368	0.792616	0.245267	0.200824
PIR1		2567.56	2465.28	2986.5	5364.51	8010.6	6075.07	753.237	759.35	4726.41		2837.59	2538.92	2986.5	7172.78	8010.6	8074.9	985.994	966.186	4726.41		2787.67	7752.76	2226.2		2787.67	8479.34	2399.64		PIR1	3.04173	9.94729e-05	0.000144817	0.860806	0.67823	0.439639
PLB5		467.562	517.277	529.498	56.5064	152.598	111.075	367.237	403.35	315.407		516.736	532.729	529.498	75.5536	152.598	147.639	480.717	513.217	315.407		526.321	125.264	436.447		526.321	137.003	470.451		PLB5	0.260303	9.35704e-05	0.000140355	0.893849	0.217333	0.18347
POL1		154.562	184.277	184.498	116.506	366.598	204.075	264.237	309.35	181.407		170.818	189.782	184.498	155.778	366.598	271.253	345.889	393.613	181.407		181.699	264.543	306.969		181.699	289.336	330.886		POL1	1.59239	0.247357	0.0789947	1.82107	0.124166	0.121817
PRA1		57.5622	48.277	43.4975	1	65.5982	21.0747	175.237	142.35	2955.41		63.6161	49.7192	43.4975	1	65.5982	28.0122	229.387	181.124	2955.41		52.2776	31.5368	1121.97		52.2776	34.4924	1209.39		PRA1	0.659794	0.350777	0.106538	23.134	0.308138	0.236312
RBR1		36.5622	49.277	53.4975	1	1	1	1	1	1		40.4075	50.749	53.4975	1	1	1	1	1	1		48.218	1	1		48.218	1	1		RBR1	0.0226828	0.000290475	0.00026145	0.0207391	0.000290475	0.00183498
RBR2		677.562	737.277	712.498	86.5064	210.598	157.075	150.237	147.35	1896.41		748.821	759.301	712.498	115.666	210.598	208.781	196.662	187.486	1896.41		740.207	178.349	760.185		740.207	195.063	819.413		RBR2	0.263525	8.22836e-05	0.000135762	1.10701	0.973641	0.565061
RBT1		348.562	395.277	358.498	1	1	1	680.237	713.35	286.407		385.221	407.085	358.498	1	1	1	890.436	907.656	286.407		383.601	1	694.833		383.601	1	748.969		RBT1	0.00285119	1.08116e-05	4.1161e-05	1.95247	0.20314	0.176976
RBT5		56791.6	59683.3	63232.5	40572.5	53606.6	40071.1	138773	143784	86093.4		62764.3	61466.2	63232.5	54248.7	53606.6	53261.9	181655	182949	86093.4		62487.7	53705.7	150233		62487.7	58739	161938		RBT5	0.940009	0.000128676	0.000172136	2.59151	0.0521454	0.060411
RCT1		8896.56	9828.28	13581.5	793.506	1004.6	790.075	4046.24	4051.35	7243.41		9832.21	10121.9	13581.5	1060.98	1004.6	1050.16	5296.56	5154.88	7243.41		11178.5	1038.58	5898.28		11178.5	1135.91	6357.83		RCT1	0.101616	0.0010901	0.000674499	0.568754	0.0186805	0.0281165
RFG1		857.562	863.277	639.498	2465.51	3683.6	3189.07	1216.24	1155.35	646.407		947.752	889.065	639.498	3296.58	3683.6	4238.87	1592.06	1470.05	646.407		825.438	3739.68	1236.17		825.438	4090.16	1332.49		RFG1	4.95514	0.00054649	0.000409875	1.61428	0.257937	0.205887
RFX2		305.562	309.277	393.498	1	32.5982	22.0747	252.237	257.35	185.407		337.698	318.516	393.498	1	32.5982	29.3414	330.181	327.448	185.407		349.904	20.9799	281.012		349.904	22.9461	302.906		RFX2	0.0655783	0.000181677	0.000209166	0.865684	0.262236	0.206938
RHR2		11146.6	11343.3	12908.5	2343.51	2521.6	1998.07	555.237	629.35	341.407		12318.8	11682.1	12908.5	3133.46	2521.6	2655.81	726.81	800.776	341.407		12303.2	2770.29	622.998		12303.2	3029.92	671.537		RHR2	0.246272	1.83528e-05	4.7807e-05	0.0545825	6.7925e-06	0.000229115
RIM101		3049.56	3355.28	4197.5	1170.51	1886.6	1288.07	2762.24	2805.35	2224.41		3370.28	3455.51	4197.5	1565.06	1886.6	1712.09	3615.79	3569.49	2224.41		3674.43	1721.25	3136.56		3674.43	1882.56	3380.94		RIM101	0.512342	0.00218087	0.00121297	0.920127	0.364722	0.266566
RNR22		291.562	339.277	379.498	3249.51	2320.6	2928.07	158.237	205.35	336.407		322.226	349.412	379.498	4344.85	2320.6	3891.95	207.134	261.284	336.407		350.378	3519.13	268.275		350.378	3848.94	289.177		RNR22	10.9851	0.0066781	0.0030608	0.825328	0.115578	0.115472
ROB1		1474.56	1666.28	1506.5	5299.51	6221.6	6009.07	1379.24	1377.35	1022.41		1629.64	1716.05	1506.5	7085.87	6221.6	7987.17	1805.43	1752.52	1022.41		1617.4	7098.21	1526.79		1617.4	7763.45	1645.74		ROB1	4.79996	0.000435883	0.000348017	1.01753	0.744907	0.475512
RPN4		815.562	827.277	916.498	1263.51	1705.6	1303.07	417.237	418.35	412.407		901.335	851.99	916.498	1689.41	1705.6	1732.03	546.167	532.303	412.407		889.941	1709.01	496.959		889.941	1869.18	535.678		RPN4	2.10034	3.77422e-06	3.7363e-05	0.601926	0.00109327	0.00440952
RTA3		10.5622	3.27702	1	1	1	1	8.23721	7.35002	3.40654		11.6731	3.37491	1	1	1	1	10.7826	9.35206	3.40654		5.34933	1	7.84706		5.34933	1	8.45844		RTA3	0.204459	0.250024	0.0793344	1.58122	0.561089	0.379519
SAP1		20.5622	32.277	1	1	49.5982	8.07474	0.237208	2.35002	25.4065		22.7248	33.2412	1	1.33708	49.5982	10.7328	0.310508	2.99013	25.4065		18.9887	20.556	9.56906		18.9887	22.4825	10.3146		SAP1	1.184	0.933165	0.247014	0.543198	0.489322	0.339409
SAP10		64.5622	92.277	81.4975	90.5064	169.598	119.075	25.2372	9.35002	64.4065		71.3522	95.0335	81.4975	121.014	169.598	158.272	33.0357	11.8968	64.4065		82.6278	149.628	36.4464		82.6278	163.651	39.286		SAP10	1.98058	0.0144246	0.00595015	0.475458	0.050788	0.0595202
SAP2		13.5622	7.27702	1	1	1	1	1	1	1		14.9886	7.4944	1	1	1	1	1	1	1		7.82766	1	1		7.82766	1	1		SAP2	0.139725	0.16642	0.0549185	0.127752	0.16642	0.154898
SAP4		101.562	81.277	58.4975	1	1	1	1	1	1		112.244	83.7049	58.4975	1	1	1	1	1	1		84.8153	1	1		84.8153	1	1		SAP4	0.0128953	0.00569709	0.00263557	0.0117903	0.00569709	0.0117059
SAP5		2194.56	2425.28	3218.5	1	1	1	3330.24	3276.35	5783.41		2425.36	2497.73	3218.5	1	1	1	4359.31	4168.78	5783.41		2713.86	1	4770.5		2713.86	1	5142.18		SAP5	0.000403012	0.00042989	0.000348017	1.89478	0.0224515	0.0317529
SAP6		549.562	532.277	653.498	1	1	1	1	1	1		607.36	548.177	653.498	1	1	1	1	1	1		603.012	1	1		603.012	1	1		SAP6	0.00181376	3.87668e-05	9.0628e-05	0.00165834	3.87668e-05	0.000511365
SAP9		2881.56	3209.28	3181.5	990.506	1443.6	943.075	535.237	535.35	1737.41		3184.62	3305.15	3181.5	1324.39	1443.6	1253.52	700.63	681.172	1737.41		3223.75	1340.5	1039.74		3223.75	1466.13	1120.74		SAP9	0.454791	1.05897e-05	4.1161e-05	0.347652	0.00340542	0.0087032
SCW11		820.562	965.277	659.498	2176.51	3518.6	2554.07	1139.24	1210.35	1172.41		906.861	994.112	659.498	2910.16	3518.6	3394.84	1491.27	1540.03	1172.41		853.49	3274.53	1401.24		853.49	3581.42	1510.41		SCW11	4.1962	0.000329147	0.000288142	1.76969	0.0230444	0.0317663
SCW4		294.562	311.277	383.498	1	1	1	21.2372	13.35	1017.41		325.541	320.576	383.498	1	1	1	27.7997	16.9864	1017.41		343.205	1	354.064		343.205	1	381.65		SCW4	0.00318678	7.11477e-05	0.000130442	1.11202	0.975496	0.565061
SEF1		1588.56	1649.28	1443.5	1049.51	1699.6	1492.07	1734.24	1791.35	599.407		1755.63	1698.54	1443.5	1403.27	1699.6	1983.24	2270.13	2279.29	599.407		1632.56	1695.37	1716.28		1632.56	1854.26	1850		SEF1	1.1358	0.761125	0.211661	1.13319	0.88969	0.535289
SEF2		415.562	443.277	496.498	50.5064	267.598	171.075	181.237	214.35	292.407		459.267	456.519	496.498	67.5311	267.598	227.39	237.241	272.736	292.407		470.761	187.506	267.461		470.761	205.079	288.3		SEF2	0.435634	0.010529	0.00453205	0.612412	0.000597983	0.00271335
SGA1		482.562	475.277	444.498	82.5064	305.598	150.075	64.2372	46.35	556.407		533.313	489.475	444.498	110.318	305.598	199.477	84.0871	58.9751	556.407		489.095	205.131	233.156		489.095	224.356	251.322		SGA1	0.458716	0.0101795	0.00442005	0.513851	0.193216	0.171067
SIN3		869.562	912.277	1102.5	1234.51	1991.6	1291.07	810.237	859.35	1318.41		961.014	939.529	1102.5	1650.63	1991.6	1716.08	1060.61	1093.42	1318.41		1001.01	1786.1	1157.48		1001.01	1953.49	1247.66		SIN3	1.95152	0.00251117	0.00133661	1.2464	0.177747	0.159972
SIT1		2274.56	2329.28	2162.5	484.506	565.598	632.075	318.237	321.35	410.407		2513.78	2398.86	2162.5	647.824	565.598	840.144	416.575	408.881	410.407		2358.38	684.522	411.954		2358.38	748.675	444.051		SIT1	0.317453	0.000219904	0.00024189	0.188287	4.69573e-05	0.000511365
SMC2		134.562	115.277	162.498	216.506	495.598	314.075	208.237	253.35	212.407		148.714	118.721	162.498	289.486	495.598	417.463	272.584	322.359	212.407		143.311	400.849	269.117		143.311	438.417	290.084		SMC2	3.0592	0.0137956	0.00573851	2.02416	0.0214612	0.0311616
SOD4		348.562	382.277	236.498	414.506	698.598	494.075	753.237	781.35	713.407		385.221	393.696	236.498	554.228	698.598	656.717	985.994	994.179	713.407		338.472	636.514	897.86		338.472	696.168	967.814		SOD4	2.0568	0.0110698	0.00472375	2.85937	0.00606492	0.0122309
SOD5		25247.6	26888.3	34605.5	3043.51	5994.6	3383.07	8471.24	8605.35	16786.4		27902.8	27691.5	34605.5	4069.41	5994.6	4496.73	11088.9	10949.3	16786.4		30066.6	4853.58	12941.6		30066.6	5308.45	13949.9		SOD5	0.176556	0.000423577	0.000348017	0.463965	0.00451808	0.0100412
SOD6		553.562	630.277	831.498	447.506	757.598	481.075	1	1	1		611.78	649.105	831.498	598.352	757.598	639.437	1	1	1		697.461	665.129	1		697.461	727.464	1		SOD6	1.04302	0.716667	0.201563	0.00143377	0.000508733	0.00258468
SOG2		234.562	243.277	262.498	243.506	553.598	309.075	309.237	296.35	206.407		259.231	250.544	262.498	325.588	553.598	410.817	404.794	377.072	206.407		257.424	430.001	329.424		257.424	470.3	355.09		SOG2	1.82695	0.0606338	0.0214384	1.3794	0.310983	0.236825
SSB1		4952.56	5277.28	6185.5	2946.51	4831.6	3612.07	11982.2	12289.4	7818.41		5473.42	5434.92	6185.5	3939.72	4831.6	4801.11	15684.9	15636.8	7818.41		5697.95	4524.14	13046.7		5697.95	4948.14	14063.2		SSB1	0.868408	0.0368458	0.0137133	2.46811	0.0488642	0.058476
STF2		26412.6	28402.3	33206.5	30070.5	52476.6	33298.1	3436.24	3509.35	35817.4		29190.4	29250.7	33206.5	40206.7	52476.6	44259.3	4498.06	4465.25	35817.4		30549.2	45647.5	14926.9		30549.2	49925.6	16089.9		STF2	1.63427	0.0171678	0.00685327	0.526688	0.212051	0.180409
STP2		2027.56	2065.28	2075.5	2772.51	4313.6	2927.07	1134.24	1168.35	2345.41		2240.8	2126.97	2075.5	3707.06	4313.6	3890.62	1484.73	1486.59	2345.41		2147.76	3970.43	1772.24		2147.76	4342.53	1910.32		STP2	2.02189	0.000609164	0.000424724	0.88945	0.266044	0.208433
SUT1		266.562	310.277	218.498	743.506	655.598	585.075	644.237	629.35	145.407		294.597	319.546	218.498	994.128	655.598	777.672	843.312	800.776	145.407		277.547	809.133	596.498		277.547	884.964	642.973		SUT1	3.18852	0.00681978	0.00307179	2.31663	0.234258	0.193263
TEC1		2010.56	1988.28	2016.5	89.5064	242.598	194.075	318.237	327.35	420.407		2222.01	2047.67	2016.5	119.677	242.598	257.961	416.575	416.515	420.407		2095.39	206.746	417.832		2095.39	226.122	450.387		TEC1	0.107914	1.68099e-05	4.6228e-05	0.214941	1.25558e-05	0.000229115
TPK1		653.562	746.277	570.498	364.506	518.598	421.075	196.237	222.35	290.407		722.297	768.57	570.498	487.374	518.598	559.686	256.876	282.915	290.407		687.122	521.886	276.733		687.122	570.797	298.294		TPK1	0.830707	0.059607	0.021227	0.43412	0.00249311	0.00696153
TPK2		780.562	727.277	576.498	1895.51	2674.6	1771.07	867.237	926.35	1499.41		862.654	749.002	576.498	2534.44	2674.6	2354.09	1135.22	1178.67	1499.41		729.385	2521.04	1271.1		729.385	2757.31	1370.14		TPK2	3.78033	0.000135942	0.000172136	1.87848	0.0187753	0.0281165
TPS2		4413.56	5005.28	5841.5	2005.51	2975.6	2213.07	1029.24	1101.35	5149.41		4877.74	5154.8	5841.5	2681.52	2975.6	2941.58	1347.28	1401.34	5149.41		5291.34	2866.24	2632.68		5291.34	3134.86	2837.8		TPS2	0.59245	0.00129113	0.000769993	0.536309	0.10846	0.109364
TRR1		1218.56	1388.28	1838.5	805.506	1273.6	1095.07	4401.24	4342.35	725.407		1346.72	1429.75	1838.5	1077.03	1273.6	1455.56	5761.26	5525.14	725.407		1538.32	1268.73	4003.94		1538.32	1387.63	4315.89		TRR1	0.902042	0.223269	0.071765	2.80559	0.208889	0.179118
TRX1		3047.56	3073.28	2559.5	5668.51	6941.6	4704.07	3255.24	3260.35	6429.41		3368.07	3165.08	2559.5	7579.25	6941.6	6252.58	4261.13	4148.42	6429.41		3030.88	6924.48	4946.32		3030.88	7573.43	5331.7		TRX1	2.49875	0.00101166	0.00064204	1.75912	0.070248	0.0772728
TTR1		1217.56	1328.28	1275.5	556.506	930.598	615.075	1181.24	1258.35	1257.41		1345.61	1367.96	1275.5	744.094	930.598	817.548	1546.25	1601.11	1257.41		1329.69	830.747	1468.25		1329.69	908.603	1582.65		TTR1	0.68332	0.00121483	0.000733324	1.19024	0.27696	0.213908
TUP1		633.562	744.277	756.498	1497.51	2134.6	1530.07	2518.24	2769.35	1158.41		700.194	766.51	756.498	2002.29	2134.6	2033.75	3296.39	3523.68	1158.41		741.067	2056.88	2659.49		741.067	2249.65	2866.7		TUP1	3.03569	8.09294e-06	4.006e-05	3.86834	0.0636163	0.0714207
TYE7		2793.56	2964.28	2586.5	2678.51	2697.6	2605.07	1699.24	1698.35	388.407		3087.36	3052.83	2586.5	3581.38	2697.6	3462.63	2224.32	2160.96	388.407		2908.9	3247.2	1591.23		2908.9	3551.52	1715.2		TYE7	1.22092	0.350822	0.106538	0.589641	0.101905	0.104693
UCF1		34365.6	36516.3	28164.5	84012.5	102733	82038.1	7915.24	8173.35	79527.4		37979.8	37607.1	28164.5	112331	102733	109044	10361.1	10399.7	79527.4		34583.8	108036	33429.4		34583.8	118161	36034		UCF1	3.41666	6.70993e-05	0.000127748	1.04193	0.962815	0.564256
UGA32		150.562	143.277	192.498	21.5064	100.598	55.0747	148.237	131.35	142.407		166.397	147.557	192.498	28.7558	100.598	73.2045	194.044	167.128	142.407		168.817	67.5195	167.859		168.817	73.8474	180.938		UGA32	0.43744	0.0147526	0.00603516	1.0718	0.963742	0.564256
UGP1		2981.56	3195.28	4168.5	1924.51	2677.6	1995.07	4304.24	4393.35	7390.41		3295.13	3290.73	4168.5	2573.22	2677.6	2651.82	5634.28	5590.04	7390.41		3584.79	2634.21	6204.91		3584.79	2881.09	6688.35		UGP1	0.803699	0.0317254	0.0120801	1.86576	0.0166094	0.0265995
UME6		204.562	235.277	198.498	1	1	1	137.237	110.35	377.407		226.076	242.305	198.498	1	1	1	179.645	140.408	377.407		222.293	1	232.486		222.293	1	250.6		UME6	0.00492017	6.54236e-05	0.000127748	1.12734	0.897707	0.537145
UPC2		149.562	192.277	162.498	664.506	610.598	500.075	241.237	262.35	183.407		165.292	198.021	162.498	888.498	610.598	664.692	315.782	333.81	183.407		175.27	721.263	277.666		175.27	788.859	299.3		UPC2	4.50082	0.00312963	0.0016137	1.70765	0.103695	0.105536
WH11		22900.6	25348.3	23746.5	55.5064	150.598	88.0747	157.237	156.35	9223.41		25309	26105.5	23746.5	74.2165	150.598	117.068	205.825	198.938	9223.41		25053.7	113.961	3209.39		25053.7	124.641	3459.44		WH11	0.00497496	3.56275e-06	3.7363e-05	0.138081	0.00210181	0.00602335
YHB1		10245.6	10446.3	10483.5	826.506	2096.6	778.075	429.237	418.35	3849.41		11323.1	10758.3	10483.5	1105.11	2096.6	1034.2	561.875	532.303	3849.41		10855	1411.97	1647.86		10855	1544.3	1776.25		YHB1	0.142266	2.37718e-05	5.8831e-05	0.163635	0.00122728	0.00465692
YWP1		170.562	163.277	167.498	9048.51	11165.6	8773.07	1	1	1		188.5	168.154	167.498	12098.6	11165.6	11661	1	1	1		174.717	11641.7	1		174.717	12732.8	1		YWP1	72.8765	1.82626e-06	3.7363e-05	0.00572353	1.47273e-05	0.000229115
ZAP1		37.5622	45.277	53.4975	1	65.5982	36.0747	125.237	174.35	113.407		41.5127	46.6295	53.4975	1	65.5982	47.95	163.937	221.84	113.407		47.2133	38.1827	166.395		47.2133	41.7612	179.359		ZAP1	0.884523	0.668719	0.190239	3.79891	0.019413	0.0285686
ZCF20		415.562	391.277	356.498	512.506	714.598	638.075	500.237	458.35	392.407		459.267	402.965	356.498	685.262	714.598	848.119	654.815	583.198	392.407		406.243	749.327	543.473		406.243	819.553	585.817		ZCF20	2.01739	0.00415823	0.00204009	1.44203	0.176681	0.159972
ZCF3		1191.56	1226.28	1013.5	782.506	1301.6	1368.07	592.237	546.35	504.407		1316.88	1262.91	1013.5	1046.27	1301.6	1818.42	775.244	695.168	504.407		1197.76	1388.77	658.273		1197.76	1518.92	709.561		ZCF3	1.26813	0.480163	0.141477	0.592405	0.0118923	0.0208883
ZCF31		80.5622	107.277	75.4975	401.506	603.598	382.075	270.237	228.35	374.407		89.035	110.482	75.4975	536.846	603.598	507.848	353.743	290.549	374.407		91.6714	549.431	339.566		91.6714	600.923	366.023		ZCF31	6.55519	0.00010932	0.000150288	3.99277	0.000804327	0.00350365
ZCF34		111.562	113.277	89.4975	60.5064	161.598	104.075	278.237	314.35	142.407		123.295	116.661	89.4975	80.9019	161.598	138.335	364.215	399.974	142.407		109.818	126.945	302.199		109.818	138.842	325.744		ZCF34	1.26429	0.547738	0.158556	2.96622	0.0769373	0.0829551
ZCF39		820.562	869.277	987.498	405.506	619.598	402.075	337.237	387.35	901.407		906.861	895.244	987.498	542.195	619.598	534.432	441.446	492.859	901.407		929.868	565.408	611.904		929.868	618.398	659.579		ZCF39	0.665038	0.000786264	0.000533176	0.709326	0.0987555	0.102424
ZCF7		104.562	84.277	57.4975	20.5064	125.598	59.0747	56.2372	85.35	122.407		115.559	86.7946	57.4975	27.4187	125.598	78.5212	73.615	108.598	122.407		86.6171	77.1794	101.54		86.6171	84.4126	109.451		ZCF7	0.974549	0.788678	0.214503	1.26362	0.53787	0.370722
ZRT1		72.5622	67.277	72.4975	1	22.5982	8.07474	105.237	145.35	912.407		80.1936	69.2867	72.4975	1	22.5982	10.7328	137.756	184.941	912.407		73.9926	11.4437	411.701		73.9926	12.5162	443.778		ZRT1	0.169154	0.000883567	0.000591057	5.9976	0.249283	0.202589
ZRT2		199.562	232.277	299.498	18.5064	134.598	60.0747	2133.24	2274.35	548.407		220.55	239.216	299.498	24.7445	134.598	79.8504	2792.43	2893.85	548.407		253.088	79.7311	2078.23		253.088	87.2034	2240.15		ZRT2	0.344558	0.0119612	0.00501762	8.85127	0.0757267	0.0824664
orf19.1424		298.562	298.277	330.498	186.506	409.598	263.075	364.237	384.35	644.407		329.962	307.187	330.498	249.374	409.598	349.675	476.79	489.041	644.407		322.549	336.216	536.746		322.549	367.726	578.565		orf19.1424	1.14006	0.787275	0.214503	1.79373	0.0170902	0.0269728
orf19.1534		103.562	79.277	38.4975	22.5064	115.598	56.0747	204.237	248.35	212.407		114.454	81.6452	38.4975	30.0929	115.598	74.5337	267.348	315.997	212.407		78.1989	73.4083	265.251		78.1989	80.288	285.917		orf19.1534	1.02672	0.891811	0.237337	3.65628	0.00729792	0.0139429
orf19.1691		63.5622	65.277	1	805.506	372.598	728.075	48.2372	49.35	25.4065		70.2471	67.227	1	1077.03	372.598	967.746	63.1429	62.7923	25.4065		46.158	805.79	50.4472		46.158	881.308	54.3777		orf19.1691	19.0933	0.0260028	0.0100558	1.17808	0.876183	0.53009
orf19.1862		4616.56	5165.28	5439.5	656.506	1034.6	793.075	319.237	264.35	2644.41		5102.09	5319.58	5439.5	877.802	1034.6	1054.14	417.884	336.355	2644.41		5287.05	988.848	1132.88		5287.05	1081.52	1221.15		orf19.1862	0.20456	2.89664e-06	3.7363e-05	0.230969	0.00551473	0.0115491
orf19.2125		1218.56	1306.28	1289.5	645.506	1312.6	786.075	1029.24	1037.35	1505.41		1346.72	1345.3	1289.5	863.094	1312.6	1044.84	1347.28	1319.91	1505.41		1327.17	1073.51	1390.87		1327.17	1174.12	1499.23		orf19.2125	0.884677	0.126819	0.0422928	1.12964	0.35399	0.262242
orf19.3615		918.562	922.277	855.498	455.506	814.598	523.075	192.237	235.35	747.407		1015.17	949.828	855.498	609.049	814.598	695.263	251.64	299.456	747.407		940.164	706.303	432.834		940.164	772.497	466.558		orf19.3615	0.821662	0.0362996	0.0136124	0.496251	0.0368205	0.0460891
orf19.409		4626.56	5002.28	4848.5	2209.51	3562.6	2291.07	1784.24	1817.35	1225.41		5113.14	5151.71	4848.5	2954.29	3562.6	3045.26	2335.58	2312.37	1225.41		5037.78	3187.38	1957.79		5037.78	3486.1	2110.32		orf19.409	0.691991	0.000950139	0.000618815	0.418899	0.00124014	0.00465692
orf19.411		182.562	188.277	275.498	263.506	284.598	218.075	141.237	167.35	249.407		201.762	193.901	275.498	352.329	284.598	289.862	184.881	212.934	249.407		223.72	308.93	215.74		223.72	337.882	232.549		orf19.411	1.51029	0.0657576	0.0229225	1.03946	0.815379	0.501665
orf19.4174		338.562	375.277	430.498	345.506	716.598	384.075	206.237	234.35	499.407		374.169	386.487	430.498	461.97	716.598	510.506	269.966	298.184	499.407		397.051	563.025	355.852		397.051	615.791	383.578		orf19.4174	1.55091	0.106368	0.036063	0.966066	0.608471	0.406518
orf19.449		2756.56	3212.28	3838.5	1658.51	3931.6	2074.07	816.237	846.35	5875.41		3046.47	3308.23	3838.5	2217.56	3931.6	2756.83	1068.46	1076.88	5875.41		3397.73	2968.66	2673.58		3397.73	3246.88	2881.89		orf19.449	0.955602	0.484128	0.141572	0.84818	0.677599	0.439639
orf19.4706		640.562	751.277	743.498	194.506	440.598	275.075	88.2372	97.35	523.407		707.93	773.719	743.498	260.071	440.598	365.625	115.503	123.867	523.407		741.716	355.431	254.259		741.716	388.742	274.069		orf19.4706	0.524112	0.00227109	0.0012491	0.369507	0.023043	0.0317663
orf19.5517		258.562	291.277	162.498	36.5064	111.598	100.075	558.237	639.35	139.407		285.755	299.978	162.498	48.812	111.598	133.018	730.737	813.5	139.407		249.41	97.8093	561.215		249.41	106.976	604.94		orf19.5517	0.428915	0.0397126	0.0145613	2.42548	0.223575	0.185858
orf19.5626		1490.56	1667.28	1204.5	2930.51	3858.6	2232.07	227.237	235.35	1606.41		1647.32	1717.08	1204.5	3918.32	3858.6	2966.84	297.455	299.456	1606.41		1522.97	3581.25	734.439		1522.97	3916.88	791.662		orf19.5626	2.57188	0.00405045	0.0020252	0.519815	0.164884	0.154792
orf19.5848		250.562	319.277	351.498	87.5064	310.598	179.075	100.237	94.35	222.407		276.914	328.815	351.498	117.003	310.598	238.023	131.211	120.05	222.407		319.075	221.875	157.889		319.075	242.669	170.191		orf19.5848	0.760538	0.184147	0.0599688	0.533387	0.0147357	0.0254229
orf19.6578		1834.56	2107.28	1850.5	156.506	375.598	202.075	461.237	494.35	706.407		2027.5	2170.23	1850.5	209.262	375.598	268.595	603.763	629.004	706.407		2016.08	284.485	646.391		2016.08	311.146	696.753		orf19.6578	0.154333	7.76903e-05	0.000134964	0.345599	0.000148953	0.00124777
orf19.6660		216.562	259.277	253.498	126.506	257.598	177.075	66.2372	73.35	106.407		239.338	267.022	253.498	169.149	257.598	235.365	86.7051	93.3295	106.407		253.286	220.704	95.4804		253.286	241.388	102.92		orf19.6660	0.953027	0.30534	0.0950586	0.406337	8.94071e-05	0.000811369
orf19.670.2		35350.6	41057.3	43613.5	11508.5	28172.6	15493.1	4459.24	4502.35	9796.41		39068.4	42283.8	43613.5	15387.8	28172.6	20593.2	5837.18	5728.73	9796.41		41655.2	21384.5	7120.77		41655.2	23388.7	7675.57		orf19.670.2	0.561482	0.00682619	0.00307179	0.184264	5.39118e-05	0.000533727
ARP3		821.562	873.277	1075.5	1078.51	1430.6	1024.07	1315.24	1351.35	1442.41		907.966	899.364	1075.5	1442.05	1430.6	1361.18	1721.66	1719.44	1442.41		960.942	1411.28	1627.83		960.942	1543.54	1754.66		ARP3	1.60628	0.00198455	0.00112911	1.82598	0.00361524	0.00894772
CLN3		1113.56	1226.28	728.498	899.506	1135.6	1012.07	513.237	517.35	710.407		1230.68	1262.91	728.498	1202.71	1135.6	1345.23	671.832	658.269	710.407		1074.03	1227.85	680.169		1074.03	1342.92	733.163		CLN3	1.25036	0.449565	0.133254	0.68263	0.0859915	0.0909172
CMK2		886.562	995.277	1107.5	890.506	1536.6	1017.07	686.237	637.35	1276.41		979.802	1025.01	1107.5	1190.68	1536.6	1351.88	898.29	810.955	1276.41		1037.44	1359.72	995.217		1037.44	1487.15	1072.76		CMK2	1.43349	0.0391437	0.0144598	1.03405	0.789121	0.492475
YRA1		1011.56	1129.28	990.498	1523.51	2411.6	1643.07	1760.24	1752.35	1590.41		1117.95	1163.01	990.498	2037.05	2411.6	2183.95	2304.17	2229.66	1590.41		1090.49	2210.87	2041.41		1090.49	2418.07	2200.46		YRA1	2.21742	0.00074648	0.000513219	2.01788	0.0149409	0.0254229
orf19.3456		79.5622	134.277	98.4975	1	59.5982	48.0747	59.2372	84.35	84.4065		87.9298	138.288	98.4975	1	59.5982	63.9002	77.542	107.326	84.4065		108.239	41.4995	89.7581		108.239	45.3888	96.7514		orf19.3456	0.41934	0.0585226	0.0209918	0.893872	0.357324	0.262923
Sum		724412	777376	800598	547462	732001	550714	567400	583732	742732											Sum	800598	731996	742730
NF		1.10517	1.02987	1	1.33708	1	1.32918	1.30901	1.27239	1											NF	1	1.09372	1.07791

## Sheet: In vivo_Ear-efg1nrg1
Probe Name		Counts after Background subtraction													Normalize count - WT						Normalize count - efg1			Normalize count-efg1ΔΔ+nrg1ΔΔ				Avg_Individual replicates				Normalize to WT-Avg				Probe name	efg1ΔΔ/WT			efg1ΔΔ nrg1ΔΔ/wt
		WT_E1	WT_E2	WT_E3	WT_E4	WT_E5	WT_E6	efg1ΔΔ	efg1ΔΔ	efg1ΔΔ	efg1ΔΔ nrg1ΔΔ	efg1ΔΔ nrg1ΔΔ	efg1ΔΔ nrg1ΔΔ		WT_E1	WT_E2	WT_E3	WT_E4	WT_E5	WT_E6	efg1ΔΔ	efg1ΔΔ	efg1ΔΔ	efg1ΔΔ nrg1ΔΔ	efg1ΔΔ nrg1ΔΔ	efg1ΔΔ nrg1ΔΔ		Avg_WT	Avg_efg1ΔΔ	Avg_efg1ΔΔ nrg1ΔΔ		WT	efg1ΔΔ	efg1ΔΔ nrg1ΔΔ			FC	T-test	FDR	FC	T-test	FDR
ACE2		171.094	146.52	201.292	167.844	191.765	106.039	260.76	380.993	201.239	515.032	1434.9	737.066		186.906	177.066	201.292	186.264	253.157	255.536	393.863	602.044	201.239	1332.33	1434.9	2168.65		210.037	399.049	1645.29		210.037	1287.02	2759.31		ACE2	6.12758	0.0471996	0.0423422	13.1373	7.40548e-05	0.00239709
ACS1		1412.09	2601.52	1574.29	2954.84	1594.76	1414.04	2307.76	1943.99	3780.24	676.032	2168.9	379.066		1542.6	3143.87	1574.29	3279.13	2105.32	3407.61	3485.74	3071.89	3780.24	1748.82	2168.9	1115.32		2508.8	3445.96	1677.68		2508.8	11114	2813.63		ACS1	4.42998	0.124088	0.0875249	1.1215	0.179001	0.155102
ACS2		723.094	1369.52	731.292	1497.84	612.765	280.039	466.76	428.993	592.239	86.0317	441.898	67.0662		789.921	1655.03	731.292	1662.23	808.937	674.85	705.014	677.893	592.239	222.554	441.898	197.327		1053.71	658.382	287.26		1053.71	2123.43	481.762		ACS2	2.01519	0.204148	0.131911	0.457206	0.0315393	0.0461112
ADH5		24870.1	12890.5	27998.3	14068.8	20733.8	14121	568.76	538.993	1088.24	2064.03	3745.9	1250.07		27168.5	15577.9	27998.3	15612.8	27371.5	34029.5	859.079	851.715	1088.24	5339.42	3745.9	3678.04		24626.4	933.011	4254.45		24626.4	3009.16	7135.12		ADH5	0.122192	0.00109077	0.00299267	0.289734	0.00258599	0.0129519
AHR1		2491.09	1344.52	2530.29	1423.84	2911.76	1402.04	97.7602	76.9927	167.239	457.032	926.898	368.066		2721.31	1624.82	2530.29	1580.1	3843.95	3378.7	147.661	121.664	167.239	1182.29	926.898	1082.95		2613.2	145.521	1064.05		2613.2	469.338	1784.51		AHR1	0.179603	0.00271752	0.00542309	0.682883	0.0254249	0.0396834
ALS1		4263.09	2930.52	4923.29	3157.84	5836.76	3520.04	63.7602	74.9927	171.239	699.032	1438.9	717.066		4657.08	3541.46	4923.29	3504.4	7705.36	8482.75	96.3061	118.503	171.239	1808.32	1438.9	2109.81		5469.06	128.683	1785.67		5469.06	415.03	2994.75		ALS1	0.0758869	0.00402831	0.0069685	0.54758	0.0235281	0.0377429
ALS2		42.094	46.5205	41.2919	62.8437	30.7649	4.03852	245.76	302.993	278.239	1	1	1		45.9842	56.2188	41.2919	69.7406	40.6141	9.73221	371.206	478.788	278.239	1	1	1		43.9303	376.078	1		43.9303	1212.93	1		ALS2	27.6104	6.92979e-05	0.000426888	0.0227633	0.00892987	0.0198346
ALS3		10774.1	10238.5	10950.3	11292.8	8766.76	3759.04	130.76	126.993	155.239	3176.03	6985.9	3069.07		11769.8	12373	10950.3	12532.2	11573.4	9058.7	197.506	200.674	155.239	8216.04	6985.9	9030.04		11376.2	184.473	8077.32		11376.2	594.965	13546.4		ALS3	0.0522989	1.58694e-06	2.9328e-05	1.19077	0.00616356	0.0174759
ALS4		4614.09	648.52	4714.29	781.844	978.765	1001.04	281.76	325.993	429.239	207.032	357.898	232.066		5040.52	783.721	4714.29	867.648	1292.11	2412.35	425.582	515.133	429.239	535.568	357.898	682.803		2518.44	456.651	525.423		2518.44	1472.8	881.184		ALS4	0.584807	0.115452	0.0833418	0.349893	0.126426	0.124524
ALS5		105.094	35.5205	114.292	21.8437	114.765	27.0385	38.7602	53.9927	52.239	25.0317	29.8979	7.06618		114.807	42.9256	114.292	24.241	151.506	65.1587	58.545	85.3191	52.239	64.7541	29.8979	20.7907		85.4883	65.3677	38.4809		85.4883	210.825	64.5361		ALS5	2.46613	0.524573	0.276974	0.754912	0.168252	0.147692
ALS6		1	1	1	1	1	1	1	1	1	1	1	1		1	1	1	1	1	1	1	1	1	1	1	1		1	1	1		1	1	1		ALS6	3.22522	1	0.491489	1	1	0.614362
ALS7		758.094	512.52	810.292	548.844	1489.76	922.039	4248.76	4961.99	5383.24	325.032	363.898	232.066		828.155	619.368	810.292	609.077	1966.7	2221.97	6417.5	7840.93	5383.24	840.82	363.898	682.803		1175.93	6547.22	629.174		1175.93	21116.2	1055.18		ALS7	17.9571	6.39376e-05	0.000426888	0.897321	0.255039	0.20176
ALS9		56.094	76.5205	82.2919	86.8437	52.7649	6.03852	58.7602	41.9927	134.239	1	1	1		61.2781	92.4731	82.2919	96.3745	69.6572	14.5519	88.7539	66.3567	134.239	1	1	1		69.4378	96.4499	1		69.4378	311.072	1		ALS9	4.47987	0.262922	0.150894	0.0144014	0.00656738	0.0176403
AOX2		4342.09	2849.52	4840.29	3008.84	3898.76	1830.04	4004.76	3648.99	3748.24	2327.03	9103.9	4874.07		4743.38	3443.57	4840.29	3339.05	5146.93	4410.11	6048.95	5766.13	3748.24	6019.77	9103.9	14340.8		4320.56	5187.77	9821.51		4320.56	16731.7	16471.6		AOX2	3.87258	0.227595	0.139853	3.81238	0.0126365	0.0256056
ARG1		140.094	142.52	139.292	170.844	93.7649	31.0385	145.76	98.9927	436.239	32.0317	187.898	1		153.041	172.232	139.292	189.593	123.783	74.798	220.162	156.428	436.239	82.8623	187.898	1		142.123	270.943	90.5867		142.123	873.851	151.923		ARG1	6.14854	0.0705916	0.0572163	1.06895	0.268228	0.20709
ARG81		135.094	167.52	142.292	175.844	316.765	112.039	131.76	125.993	219.239	19.0317	41.8979	1		147.579	202.444	142.292	195.142	418.175	269.996	199.016	199.093	219.239	49.2328	41.8979	1		229.271	205.783	30.7102		229.271	663.694	51.504		ARG81	2.8948	0.715837	0.366146	0.224642	0.0156379	0.0306131
BCR1		778.094	557.52	929.292	566.844	1228.76	648.039	161.76	176.993	294.239	344.032	1119.9	229.066		850.004	673.75	929.292	629.053	1622.15	1561.67	244.329	279.683	294.239	889.971	1119.9	673.976		1044.32	272.751	894.615		1044.32	879.68	1500.36		BCR1	0.842348	0.021684	0.0250552	1.43668	0.603584	0.407684
BRG1		3437.09	1575.52	4080.29	1761.84	4078.76	2210.04	52.7602	39.9927	127.239	542.032	2000.9	430.066		3754.74	1903.98	4080.29	1955.2	5384.55	5325.85	79.6912	63.1963	127.239	1402.17	2000.9	1265.37		3734.1	90.0422	1556.15		3734.1	290.406	2609.81		BRG1	0.0777712	0.00550702	0.00829543	0.698912	0.0523586	0.0643343
CAP1		1603.09	1206.52	1642.29	1321.84	1829.76	928.039	597.76	520.993	780.239	430.032	1380.9	278.066		1751.25	1458.05	1642.29	1466.91	2415.55	2236.43	902.882	823.272	780.239	1112.44	1380.9	818.148		1828.41	835.464	1103.83		1828.41	2694.55	1851.23		CAP1	1.47371	0.00466347	0.00730352	1.01248	0.0288635	0.0432953
CAT1		2842.09	1639.52	2983.29	1719.84	907.765	788.039	1670.76	1248.99	2933.24	464.032	967.898	201.066		3104.75	1981.32	2983.29	1908.59	1198.38	1899.05	2523.58	1973.66	2933.24	1200.4	967.898	591.592		2179.23	2476.83	919.963		2179.23	7988.31	1542.87		CAT1	3.66565	0.54844	0.287931	0.707986	0.0267725	0.0412296
CDC10		337.094	691.52	382.292	773.844	224.765	99.0385	1	4.99268	23.239	1	1	1		368.247	835.685	382.292	858.77	296.722	238.668	1	7.88942	23.239	1	1	1		496.731	10.7095	1		496.731	34.5404	1		CDC10	0.0695355	0.0216928	0.0250552	0.00201316	0.0199301	0.0349053
CDR1		1427.09	1467.52	1524.29	1710.84	1858.76	741.039	275.76	203.993	427.239	814.032	997.898	780.066		1558.98	1773.46	1524.29	1898.6	2453.84	1785.79	416.52	322.349	427.239	2105.81	997.898	2295.17		1832.49	388.702	1799.63		1832.49	1253.65	3018.14		CDR1	0.684123	0.000187097	0.00078582	1.64701	0.924032	0.570726
CDR2		21.094	25.5205	15.2919	28.8437	1	1	1	1	1	1	1	1		23.0434	30.8408	15.2919	32.0092	1.32014	2.40985	1	1	1	1	1	1		17.4859	1	1		17.4859	1	1		CDR2	0.184447	0.0806187	0.062598	0.0571889	0.0806187	0.0870229
CHT2		111.094	1230.52	111.292	1301.84	118.765	92.0385	233.76	178.993	404.239	183.032	879.898	241.066		121.361	1487.05	111.292	1444.72	156.787	221.799	353.081	282.844	404.239	473.482	879.898	709.283		590.501	346.721	687.555		590.501	1118.25	1153.09		CHT2	1.89373	0.567707	0.296362	1.95274	0.821034	0.515377
CHT3		298.094	186.52	318.292	190.844	254.765	151.039	644.76	439.993	808.239	40.0317	94.8979	21.0662		325.643	225.405	318.292	211.788	336.326	363.98	973.872	695.275	808.239	103.557	94.8979	61.9825		296.906	825.796	86.8126		296.906	2663.37	145.593		CHT3	8.97043	8.09641e-05	0.000440041	0.490368	0.000936254	0.00826644
CIT1		2130.09	2954.52	2228.29	3167.84	2202.76	1362.04	3048.76	2220.99	6444.24	828.032	1743.9	410.066		2326.95	3570.46	2228.29	3515.5	2907.96	3282.3	4604.97	3509.61	6444.24	2142.02	1743.9	1206.53		2971.91	4852.94	1697.48		2971.91	15651.8	2846.84		CIT1	5.26657	0.0248771	0.0280322	0.957916	0.0142218	0.0283211
CPH1		121.094	124.52	136.292	159.844	71.7649	15.0385	28.7602	21.9927	39.239	4.03166	55.8979	1		132.285	150.48	136.292	177.386	94.7399	36.2405	43.4406	34.7528	39.239	10.4295	55.8979	1		121.237	39.1441	22.4425		121.237	126.248	37.6381		CPH1	1.04133	0.0278034	0.030388	0.31045	0.0167626	0.0312271
CPH2		1306.09	1103.52	1407.29	1350.84	1844.76	872.039	842.76	1059.99	1715.24	1677.03	3081.9	1770.07		1426.8	1333.58	1407.29	1499.09	2435.35	2101.48	1272.94	1675	1715.24	4338.29	3081.9	5208.02		1700.6	1554.39	4209.4		1700.6	5013.25	7059.57		CPH2	2.94793	0.626603	0.32527	4.15123	0.00132359	0.00849302
CRH11		609.094	1114.52	634.292	1133.84	888.765	409.039	172.76	152.993	389.239	95.0317	398.898	56.0662		665.385	1346.87	634.292	1258.28	1173.3	985.72	260.944	241.759	389.239	245.836	398.898	164.962		1010.64	297.314	269.899		1010.64	958.902	452.646		CRH11	0.948807	0.00611581	0.00869385	0.44788	0.00548047	0.0174759
CSA1		2691.09	19588.5	2922.29	21704.8	3442.76	1865.04	1077.76	1274.99	2371.24	1153.03	3614.9	1082.07		2939.8	23672.2	2922.29	24086.9	4544.94	4494.45	1627.89	2014.74	2371.24	2982.76	3614.9	3183.74		10443.4	2004.62	3260.47		10443.4	6465.35	5468.11		CSA1	0.619083	0.218069	0.137015	0.523594	0.28719	0.219672
CSH1		1409.09	4572.52	1657.29	4830.84	903.765	500.039	363.76	445.993	1158.24	675.032	1116.9	242.066		1539.32	5525.78	1657.29	5361.01	1193.1	1205.02	549.438	704.757	1158.24	1746.23	1116.9	712.226		2746.92	804.145	1191.78		2746.92	2593.54	1998.74		CSH1	0.944164	0.166729	0.113277	0.727629	0.259935	0.204234
DAK2		341.094	267.52	388.292	294.844	151.765	93.0385	154.76	143.993	344.239	78.0317	182.898	32.0662		372.617	323.292	388.292	327.202	200.351	224.208	233.756	227.537	344.239	201.859	182.898	94.3476		305.994	268.511	159.702		305.994	866.006	267.835		DAK2	2.83014	0.497517	0.267271	0.875295	0.0240204	0.0380049
DDR48		7073.09	23028.5	7396.29	24984.8	6700.76	4604.04	71.7602	82.9927	435.239	1795.03	9143.9	1131.07		7726.77	27829.4	7396.29	27726.8	8845.97	11095	108.39	131.145	435.239	4643.54	9143.9	3327.91		15103.4	224.924	5705.12		15103.4	725.431	9568.03		DDR48	0.048031	0.0401684	0.0379327	0.633502	0.163016	0.144834
DFG5		269.094	632.52	279.292	644.844	275.765	94.0385	125.76	132.993	177.239	45.0317	365.898	30.0662		293.963	764.385	279.292	715.613	364.049	226.618	189.953	210.155	177.239	116.492	365.898	88.463		440.653	192.449	190.284		440.653	620.69	319.125		DFG5	1.40857	0.122789	0.0872748	0.724208	0.145014	0.137558
ECE1		179799	114509	193992	122733	151346	73162	2.76023	9.99268	19.239	41993	96551.9	27843.1		196416	138381	193992	136202	199798	176309	4.16916	15.7904	19.239	108631	96551.9	81922		173516	13.0662	95701.7		173516	42.1413	160501		ECE1	0.000242867	2.23203e-05	0.000229152	0.92499	0.00365355	0.0150709
ECM331		1322.09	1807.52	1346.29	1962.84	1303.76	819.039	52.7602	45.9927	172.239	91.0317	397.898	0.0661801		1444.28	2184.34	1346.29	2178.26	1721.16	1973.76	79.6912	72.6775	172.239	235.489	397.898	0.19472		1808.01	108.203	211.194		1808.01	348.977	354.192		ECM331	0.193017	0.000107365	0.000506352	0.195901	0.000221319	0.00365176
EFG1		664.094	1408.52	718.292	1477.84	1156.76	438.039	1	1	1	1	1	1		725.468	1702.16	718.292	1640.03	1527.1	1055.61	1	1	1	1	1	1		1228.11	1	1		1228.11	1	1		EFG1	0.00262617	0.00269131	0.00542309	0.00081426	0.00269131	0.0129519
ELF1		125.094	103.52	156.292	124.844	112.765	36.0385	66.7602	46.9927	269.239	63.0317	136.898	85.0662		136.655	125.102	156.292	138.545	148.866	86.8473	100.837	74.2577	269.239	163.056	136.898	250.288		132.051	148.111	183.414		132.051	477.692	307.603		ELF1	3.61747	0.717235	0.366146	2.32942	0.0971004	0.100135
ENA2		1303.09	1418.52	1430.29	1582.84	1605.76	982.039	483.76	423.993	753.239	370.032	911.898	438.066		1423.52	1714.25	1430.29	1756.55	2119.84	2366.56	730.691	669.992	753.239	957.23	911.898	1288.91		1801.84	717.974	1052.68		1801.84	2315.62	1765.45		ENA2	1.28515	0.00197247	0.00455647	0.979803	0.0163227	0.0311392
ENA21		2159.09	3905.52	2424.29	4270.84	2266.76	1050.04	487.76	434.993	1142.24	1404.03	4454.9	1597.07		2358.63	4719.72	2424.29	4739.55	2992.45	2530.43	736.733	687.374	1142.24	3632.07	4454.9	4699.01		3294.18	855.449	4261.99		3294.18	2759.01	7147.77		ENA21	0.83754	0.00916038	0.0120917	2.16982	0.214927	0.177075
FAV2		166.094	116.52	170.292	93.8437	125.765	26.0385	16.7602	25.9927	151.239	49.0317	60.8979	1		181.444	140.812	170.292	104.143	166.028	62.7488	25.3153	41.0736	151.239	126.839	60.8979	1		137.578	72.5426	62.9124		137.578	233.966	105.51		FAV2	1.70061	0.12855	0.089985	0.766912	0.0787752	0.0862394
FBP1		1521.09	1090.52	1716.29	1217.84	924.765	399.039	905.76	776.993	1381.24	739.032	1254.9	395.066		1661.67	1317.87	1716.29	1351.5	1220.82	961.621	1368.1	1227.8	1381.24	1911.79	1254.9	1162.39		1371.63	1325.71	1443.03		1371.63	4275.71	2420.1		FBP1	3.11725	0.796568	0.400015	1.7644	0.763782	0.483568
FDH1		1346.09	2555.52	1463.29	2957.84	1938.76	1222.04	5102.76	4462.99	10599.2	954.032	2288.9	641.066		1470.5	3088.28	1463.29	3282.45	2559.45	2944.92	7707.42	7052.41	10599.2	2467.97	2288.9	1886.19		2468.15	8453.02	2214.35		2468.15	27262.8	3713.68		FDH1	11.0459	0.00022322	0.00085932	1.50464	0.625682	0.417724
FGR15		62.094	55.5205	50.2919	56.8437	47.7649	1	38.7602	16.9927	88.239	1	1	1		67.8326	67.0951	50.2919	63.0821	63.0565	2.40985	58.545	26.8518	88.239	1	1	1		52.2947	57.8786	1		52.2947	186.671	1		FGR15	3.5696	0.777704	0.392677	0.0191224	0.0114314	0.0236162
FKH2		133.094	63.5205	115.292	92.8437	53.7649	24.0385	29.7602	24.9927	44.239	1.03166	37.8979	1		145.394	76.7629	115.292	103.033	70.9773	57.9291	44.9511	39.4934	44.239	2.66879	37.8979	1		94.8981	42.8945	13.8556		94.8981	138.344	23.2371		FKH2	1.45782	0.0320742	0.0331612	0.244864	0.00620356	0.0174759
FRP1		1156.09	4330.52	1321.29	4775.84	3064.76	1018.04	1074.76	1137.99	1816.24	1731.03	5289.9	987.066		1262.94	5233.33	1321.29	5299.97	4045.93	2453.32	1623.36	1798.25	1816.24	4477.98	5289.9	2904.22		3269.46	1745.95	4224.03		3269.46	5631.07	7084.11		FRP1	1.72232	0.210403	0.135009	2.16675	0.450872	0.31561
FRP2		493.094	2073.52	501.292	2195.84	504.765	275.039	271.76	265.993	433.239	298.032	1465.9	173.066		538.665	2505.8	501.292	2436.83	666.362	662.8	410.478	420.321	433.239	770.974	1465.9	509.209		1218.62	421.346	915.36		1218.62	1358.93	1535.15		FRP2	1.11514	0.212602	0.135479	1.25974	0.63467	0.42129
FRP3		1190.09	1491.52	1242.29	1489.84	1033.76	866.039	3182.76	2219.99	5421.24	586.032	1710.9	397.066		1300.08	1802.47	1242.29	1653.35	1364.72	2087.02	4807.37	3508.03	5421.24	1516	1710.9	1168.28		1574.99	4578.88	1465.06		1574.99	14767.9	2457.04		FRP3	9.37651	0.000182555	0.00078582	1.56004	0.638418	0.421356
FTR1		5565.09	9311.52	6044.29	10192.8	8183.76	3451.04	3542.76	4130.99	7758.24	3518.03	11875.9	2815.07		6079.41	11252.7	6044.29	11311.5	10803.7	8316.47	5351.13	6527.79	7758.24	9100.75	11875.9	8282.7		8968.02	6545.72	9753.12		8968.02	21111.4	16356.9		FTR1	2.35407	0.165633	0.113277	1.82392	0.650281	0.426747
GAL1		7377.09	3094.52	7823.29	3351.84	6504.76	3427.04	1045.76	1107.99	1832.24	1584.03	3411.9	862.066		8058.87	3739.65	7823.29	3719.69	8587.22	8258.63	1579.56	1750.85	1832.24	4097.71	3411.9	2536.44		6697.89	1720.88	3348.68		6697.89	5550.22	5616.06		GAL1	0.828652	0.00875547	0.0117248	0.838482	0.0496409	0.0623209
GAL4		758.094	744.52	821.292	850.844	616.765	438.039	242.76	208.993	359.239	178.032	555.898	117.066		828.155	899.734	821.292	944.22	814.218	1055.61	366.675	330.25	359.239	460.548	555.898	344.441		893.871	352.055	453.629		893.871	1135.45	760.779		GAL4	1.27027	2.96701e-05	0.000274151	0.851106	0.000381675	0.00539017
GAP2		327.094	1032.52	398.292	1134.84	542.765	528.039	1203.76	890.993	1387.24	111.032	341.898	158.066		357.323	1247.78	398.292	1259.39	716.527	1272.49	1818.21	1407.94	1387.24	287.226	341.898	465.074		875.3	1537.8	364.733		875.3	4959.73	611.692		GAP2	5.66633	0.0487595	0.0433209	0.698837	0.0951849	0.0990438
GCA2		1561.09	385.52	1629.29	395.844	417.765	326.039	238.76	208.993	420.239	234.032	338.898	93.0662		1705.37	465.892	1629.29	439.286	551.509	785.702	360.633	330.25	420.239	605.414	338.898	273.826		929.508	370.374	406.046		929.508	1194.54	680.978		GCA2	1.28513	0.154146	0.106292	0.732622	0.184691	0.158013
GCN4		2526.09	2770.52	2607.29	2791.84	2439.76	1283.04	1650.76	1051.99	2026.24	998.032	3118.9	745.066		2759.55	3348.11	2607.29	3098.24	3220.84	3091.92	2493.38	1662.36	2026.24	2581.8	3118.9	2192.19		3020.99	2060.66	2630.96		3020.99	6646.07	4412.37		GCN4	2.19996	0.00421864	0.00708725	1.46057	0.15332	0.140543
GIS2		748.094	361.52	825.292	384.844	539.765	273.039	743.76	597.993	1389.24	133.032	373.898	146.066		817.231	436.888	825.292	427.079	712.567	657.981	1123.41	944.947	1389.24	344.138	373.898	429.767		646.173	1152.53	382.601		646.173	3717.16	641.658		GIS2	5.75258	0.00733508	0.0101159	0.993013	0.0438358	0.0588725
GNP1		12312.1	6378.52	14128.3	6951.84	9610.76	5358.04	2671.76	2340.99	3433.24	3328.03	6052.9	3540.07		13449.9	7708.28	14128.3	7714.78	12687.6	12912	4035.54	3699.23	3433.24	8609.24	6052.9	10415.9		11433.5	3722.67	8359.33		11433.5	12006.4	14019.4		GNP1	1.05011	0.00315284	0.00606643	1.22617	0.156098	0.141421
GPD2		399.094	176.52	467.292	177.844	499.765	246.039	53.7602	43.9927	277.239	224.032	908.898	108.066		435.977	213.321	467.292	197.361	659.761	592.915	81.2017	69.5171	277.239	579.545	908.898	317.961		427.771	142.653	602.134		427.771	460.086	1009.84		GPD2	1.07554	0.0523559	0.0460732	2.36069	0.31113	0.233347
HAC1		605.094	740.52	593.292	826.844	645.765	237.039	340.76	337.993	654.239	381.032	2557.9	254.066		661.015	894.901	593.292	917.586	852.502	571.226	514.698	534.095	654.239	985.686	2557.9	747.533		748.42	567.678	1430.37		748.42	1830.88	2398.87		HAC1	2.44633	0.108722	0.0806258	3.20525	0.118626	0.119141
HAP2		184.094	324.52	189.292	393.844	468.765	171.039	93.7602	96.9927	193.239	123.032	358.898	109.066		201.108	392.175	189.292	437.066	618.837	412.176	141.619	153.268	193.239	318.269	358.898	320.903		375.109	162.709	332.69		375.109	524.771	557.953		HAP2	1.39898	0.0642727	0.0549889	1.48744	0.67393	0.437297
HAP3		29.094	56.5205	26.2919	66.8437	41.7649	8.03852	18.7602	41.9927	62.239	1.03166	93.8979	1		31.7828	68.3036	26.2919	74.1796	55.1356	19.3716	28.3362	66.3567	62.239	2.66879	93.8979	1		45.8442	52.3107	32.5222		45.8442	168.713	54.5429		HAP3	3.68015	0.69661	0.359591	1.18975	0.60185	0.407684
HAP43		229.094	357.52	307.292	379.844	501.765	228.039	395.76	378.993	709.239	407.032	1027.9	165.066		250.266	432.055	307.292	421.53	662.401	549.538	597.772	598.883	709.239	1052.95	1027.9	485.67		437.18	635.298	855.504		437.18	2048.98	1434.76		HAP43	4.6868	0.072974	0.0581276	3.28186	0.0279732	0.0425119
HEM1		161.094	115.52	159.292	152.844	187.765	45.0385	172.76	122.993	311.239	61.0317	112.898	95.0662		175.982	139.604	159.292	169.618	247.877	108.536	260.944	194.353	311.239	157.882	112.898	279.711		166.818	255.512	183.497		166.818	824.082	307.742		HEM1	4.94001	0.0414632	0.0379327	1.84478	0.708924	0.457434
HGT7		10475.1	3268.52	10598.3	3506.84	8920.76	4072.04	2976.76	3078.99	4349.24	178.032	260.898	159.066		11443.2	3949.93	10598.3	3891.71	11776.7	9812.98	4496.22	4865.42	4349.24	460.548	260.898	468.017		8578.79	4570.29	396.487		8578.79	14740.2	664.947		HGT7	1.71821	0.110817	0.0806258	0.0775106	0.00738185	0.0189681
HOG1		211.094	396.52	234.292	434.844	172.765	74.0385	96.7602	84.9927	183.239	20.0317	175.898	4.06618		230.603	479.185	234.292	482.566	228.074	178.421	146.151	134.305	183.239	51.8197	175.898	11.9638		305.524	154.565	79.8938		305.524	498.506	133.99		HOG1	1.63164	0.110532	0.0806258	0.438557	0.0376866	0.0537383
HSP104		8048.09	2518.52	9155.29	2670.84	4472.76	3800.04	9047.76	11256	13406.2	9772.03	26409.9	18948.1		8791.88	3043.57	9155.29	2963.96	5904.69	9157.51	13666.1	17786.7	13406.2	25279.1	26409.9	55750.4		6502.82	14953	35813.2		6502.82	48226.7	60062.1		HSP104	7.41628	0.00395745	0.0069685	9.23632	0.00343155	0.0146794
HSP70		10830.1	6390.52	12551.3	7130.84	4478.76	3663.04	5946.76	6694.99	8757.24	7168.03	14404.9	11594.1		11831	7722.78	12551.3	7913.42	5912.61	8827.36	8982.23	10579.4	8757.24	18542.9	14404.9	34112.9		9126.41	9439.63	22353.6		9126.41	30444.9	37489.1		HSP70	3.33591	0.848339	0.423711	4.10776	0.0164458	0.0311392
HTA1		4114.09	4302.52	4320.29	4824.84	4038.76	2070.04	1145.76	981.993	2702.24	822.032	3327.9	604.066		4494.31	5199.49	4320.29	5354.35	5331.75	4988.47	1730.6	1551.74	2702.24	2126.5	3327.9	1777.33		4948.11	1994.86	2410.58		4948.11	6433.86	4042.77		HTA1	1.30027	6.83146e-05	0.000426888	0.817033	0.000420013	0.00539017
HTA2		1216.09	1544.52	1394.29	1625.84	1288.76	715.039	494.76	428.993	1215.24	328.032	1224.9	201.066		1328.48	1866.51	1394.29	1804.27	1701.35	1723.13	747.306	677.893	1215.24	848.581	1224.9	591.592		1636.34	880.146	888.357		1636.34	2838.66	1489.86		HTA2	1.73476	0.00323128	0.00606643	0.910482	0.00415951	0.0160141
HWP1		39715.1	43402.5	42031.3	48826.8	25640.8	14473	5.76023	1	1.23903	9261.03	28571.9	12419.1		43385.5	52450.9	42031.3	54185.4	33849.5	34877.8	8.70049	1	1.23903	23957.2	28571.9	36540.3		43463.4	3.64651	29689.8		43463.4	11.7608	49792.7		HWP1	0.00027059	6.06595e-05	0.000426888	1.14562	0.0445554	0.0589824
HYR1		6385.09	18549.5	7065.29	20574.8	3514.76	1656.04	6.76023	5.99268	35.239	1148.03	5435.9	1331.07		6975.19	22416.6	7065.29	22832.8	4639.99	3990.8	10.2109	9.46962	35.239	2969.83	5435.9	3916.36		11320.1	18.3065	4107.36		11320.1	59.0425	6888.44		HYR1	0.00521571	0.0697815	0.0572163	0.608513	0.216169	0.177075
IFD6		512.094	605.52	538.292	666.844	140.765	100.039	202.76	193.993	356.239	180.032	277.898	56.0662		559.42	731.756	538.292	740.027	185.83	241.077	306.257	306.547	356.239	465.722	277.898	164.962		499.401	323.014	302.861		499.401	1041.79	507.926		IFD6	2.08608	0.255262	0.148677	1.01707	0.240138	0.191282
IHD1		4548.09	8534.52	5150.29	9013.84	5327.76	1973.04	1.76023	1	5.23903	1550.03	4001.9	1783.07		4968.42	10313.8	5150.29	10003.1	7033.41	4754.72	2.65872	1	5.23903	4009.76	4001.9	5246.27		7037.28	2.96592	4419.31		7037.28	9.56573	7411.61		IHD1	0.00135929	0.00245208	0.00539462	1.05319	0.134936	0.130817
INO4		95.094	168.52	82.2919	192.844	112.765	40.0385	130.76	97.9927	175.239	8.03166	76.8979	1		103.882	203.653	82.2919	214.008	148.866	96.4866	197.506	154.848	175.239	20.777	76.8979	1		141.531	175.864	32.8916		141.531	567.2	55.1624		INO4	4.0076	0.357741	0.199128	0.389755	0.0219637	0.0367654
IRE1		211.094	318.52	214.292	347.844	340.765	184.039	81.7602	81.9927	240.239	34.0317	171.898	24.0662		230.603	384.924	214.292	386.018	449.858	443.504	123.494	129.565	240.239	88.0361	171.898	70.8094		351.533	164.433	110.248		351.533	530.331	184.896		IRE1	1.50862	0.0265383	0.0295438	0.52597	0.0077186	0.0189681
IRO1		431.094	610.52	545.292	673.844	578.765	274.039	53.7602	42.9927	77.239	265.032	733.898	209.066		470.935	737.799	545.292	747.795	764.052	660.391	81.2017	67.9369	77.239	685.607	733.898	615.13		654.377	75.4592	678.212		654.377	243.372	1137.43		IRO1	0.371915	9.14719e-05	0.000469546	1.73818	0.762348	0.483568
KIP4		996.094	1533.52	1092.29	1671.84	812.765	456.039	85.7602	81.9927	148.239	169.032	450.898	72.0662		1088.15	1853.22	1092.29	1855.32	1072.97	1098.98	129.536	129.565	148.239	437.266	450.898	212.039		1343.49	135.78	366.734		1343.49	437.92	615.048		KIP4	0.325957	0.00139052	0.00347249	0.457799	0.00494379	0.0173033
KRE1		449.094	550.52	460.292	640.844	750.765	350.039	98.7602	90.9927	138.239	242.032	684.898	138.066		490.598	665.29	460.292	711.174	991.117	843.539	149.172	143.786	138.239	626.109	684.898	406.229		693.668	143.732	572.412		693.668	463.568	959.989		KRE1	0.668285	0.00275248	0.00542309	1.38393	0.395167	0.281994
MAC1		87.094	194.52	85.2919	224.844	72.7649	23.0385	54.7602	27.9927	90.239	4.03166	74.8979	1		95.143	235.073	85.2919	249.519	96.0601	55.5193	82.7121	44.234	90.239	10.4295	74.8979	1		136.101	72.395	28.7758		136.101	233.49	48.2597		MAC1	1.71556	0.250693	0.147541	0.354587	0.0791461	0.0862394
MAE1		751.094	1056.52	893.292	1219.84	526.765	285.039	255.76	217.993	421.239	368.032	747.898	371.066		820.508	1276.78	893.292	1353.72	695.405	686.899	386.311	344.472	421.239	952.056	747.898	1091.78		954.433	384.007	930.578		954.433	1238.51	1560.67		MAE1	1.29764	0.0137186	0.0171297	1.63518	0.901469	0.559783
MBF1		1739.09	1864.52	2072.29	2030.84	1920.76	1033.04	934.76	824.993	1288.24	478.032	1457.9	256.066		1899.82	2253.23	2072.29	2253.72	2535.68	2489.46	1411.9	1303.65	1288.24	1236.61	1457.9	753.417		2250.7	1334.6	1149.31		2250.7	4304.37	1927.5		MBF1	1.91246	0.000430516	0.00137166	0.856401	0.000866401	0.00826644
MDM34		10184.1	6119.52	10903.3	6895.84	10397.8	5753.04	3958.76	4381.99	5245.24	4211.03	7390.9	2290.07		11125.3	7395.29	10903.3	7652.63	13726.5	13863.9	5979.47	6924.42	5245.24	10893.5	7390.9	6738.01		10777.8	6049.71	8340.79		10777.8	19511.6	13988.3		MDM34	1.81035	0.0279543	0.030388	1.29788	0.236268	0.189506
MET28		612.094	560.52	627.292	608.844	513.765	205.039	361.76	229.993	552.239	203.032	519.898	117.066		668.662	677.375	627.292	675.662	678.243	494.111	546.417	363.434	552.239	525.22	519.898	344.441		636.891	487.363	463.186		636.891	1571.85	776.808		MET28	2.46801	0.0399644	0.0379327	1.21969	0.0204569	0.0352652
NDT80		604.094	555.52	717.292	583.844	841.765	278.039	431.76	394.993	701.239	208.032	589.898	182.066		659.923	671.333	717.292	647.918	1111.25	670.03	652.148	624.167	701.239	538.154	589.898	535.689		746.291	659.185	554.58		746.291	2126.01	930.085		NDT80	2.84877	0.449577	0.242929	1.24628	0.120266	0.119748
NPR1		163.094	138.52	187.292	141.844	215.765	88.0385	48.7602	40.9927	77.239	40.0317	89.8979	9.06618		178.167	167.399	187.292	157.411	284.841	212.159	73.6495	64.7765	77.239	103.557	89.8979	26.6752		197.878	71.8883	73.3768		197.878	231.856	123.06		NPR1	1.17171	0.00275846	0.00542309	0.621899	0.00582754	0.0174759
NRG1		1078.09	441.52	1194.29	482.844	2343.76	956.039	164.76	118.993	417.239	1	1	1		1177.73	533.566	1194.29	535.834	3094.1	2303.91	248.861	188.032	417.239	1	1	1		1473.24	284.711	1		1473.24	918.254	1		NRG1	0.623289	0.0939828	0.0717687	0.000678777	0.0470831	0.0603438
PCK1		18953.1	11821.5	20346.3	12848.8	14040.8	6109.04	2482.76	2117.99	5597.24	3657.03	7070.9	4365.07		20704.7	14286	20346.3	14259	18535.8	14721.8	3750.06	3346.85	5597.24	9460.33	7070.9	12843.2		17142.3	4231.38	9791.49		17142.3	13647.1	16421.3		PCK1	0.79611	0.000247661	0.000915499	0.95794	0.0108875	0.0232871
PES1		1.09399	1	4.29192	7.84374	3.76489	1	5.76023	1.99268	17.239	1	1	1		1.19509	1.20848	4.29192	8.70456	4.9702	2.40985	8.70049	3.14883	17.239	1	1	1		3.79668	9.69611	1		3.79668	31.2721	1		PES1	8.23669	0.106246	0.0798141	0.263388	0.146647	0.137558
PFK2		2216.09	1424.52	2526.29	1551.84	3072.76	1403.04	313.76	344.993	450.239	954.032	962.898	824.066		2420.9	1721.5	2526.29	1722.15	4056.49	3381.11	473.916	545.157	450.239	2467.97	962.898	2424.63		2638.07	489.771	1951.83		2638.07	1579.62	3273.41		PFK2	0.598777	0.00610824	0.00869385	1.24083	0.320592	0.237361
PGA13		1301.09	5552.52	1436.29	5929.84	1844.76	1050.04	13.7602	41.9927	263.239	906.032	2412.9	380.066		1421.34	6710.08	1436.29	6580.62	2435.35	2530.43	20.784	66.3567	263.239	2343.8	2412.9	1118.26		3519.02	116.793	1958.32		3519.02	376.684	3284.29		PGA13	0.107042	0.0545214	0.0475262	0.933297	0.33277	0.244278
PGA17		4.09399	46.5205	18.2919	60.8437	90.7649	33.0385	349.76	287.993	504.239	101.032	285.898	48.0662		4.47234	56.2188	18.2919	67.5211	119.823	79.6177	528.292	455.085	504.239	261.358	285.898	141.424		57.6574	495.872	229.56		57.6574	1599.3	384.994		PGA17	27.7379	1.27367e-06	2.9328e-05	6.67726	0.00292825	0.0135285
PGA25		8.09399	32.5205	9.29192	39.8437	67.7649	38.0385	345.76	273.993	478.239	28.0317	122.898	11.0662		8.84201	39.3002	9.29192	44.2164	89.4594	91.667	522.25	432.963	478.239	72.5147	122.898	32.5598		47.1295	477.817	75.9908		47.1295	1541.07	127.444		PGA25	32.6985	1.09558e-06	2.9328e-05	2.70412	0.334164	0.244278
PGA34		795.094	786.52	847.292	863.844	1013.76	458.039	801.76	645.993	1403.24	142.032	344.898	129.066		868.575	950.49	847.292	958.647	1338.31	1103.8	1211.01	1020.8	1403.24	367.42	344.898	379.748		1011.19	1211.68	364.022		1011.19	3907.94	610.5		PGA34	3.86471	0.171377	0.114263	0.603746	0.000614596	0.00709858
PGA37		86.094	160.52	112.292	178.844	149.765	34.0385	15.7602	12.9927	23.239	1	1	1		94.0506	193.985	112.292	198.471	197.711	82.0276	23.8049	20.531	23.239	1	1	1		146.423	22.525	1		146.423	72.648	1		PGA37	0.496152	0.00761227	0.0103438	0.00682953	0.00336042	0.0146794
PGA48		5280.09	2991.52	5297.29	3195.84	4568.76	3080.04	785.76	858.993	984.239	835.032	1921.9	449.066		5768.07	3615.18	5297.29	3546.57	6031.42	7422.42	1186.84	1357.38	984.239	2160.13	1921.9	1321.28		5280.16	1176.15	1801.1		5280.16	3793.35	3020.62		PGA48	0.718416	0.00254257	0.00542309	0.57207	0.00644574	0.0176403
PGA53		200.094	373.52	241.292	479.844	90.7649	56.0385	64.7602	58.9927	258.239	389.032	2388.9	528.066		218.586	451.39	241.292	532.505	119.823	135.044	97.8165	93.2201	258.239	1006.38	2388.9	1553.72		283.107	149.759	1649.67		283.107	483.004	2766.65		PGA53	1.70609	0.255955	0.148677	9.77245	0.00187039	0.00981956
PGA7		1374.09	6978.52	1615.29	7515.84	3021.76	1477.04	1302.76	1198.99	2246.24	1087.03	3231.9	660.066		1501.08	8433.37	1615.29	8340.68	3989.16	3559.43	1967.74	1894.65	2246.24	2812.03	3231.9	1942.1		4573.17	2036.21	2662.01		4573.17	6567.22	4464.44		PGA7	1.43603	0.216017	0.136712	0.976225	0.343355	0.249418
PHO89		846.094	1782.52	903.292	1989.84	924.765	654.039	32.7602	19.9927	89.239	668.032	1775.9	450.066		924.288	2154.13	903.292	2208.22	1220.82	1576.13	49.4824	31.5924	89.239	1728.12	1775.9	1324.22		1497.81	56.7713	1609.41		1497.81	183.1	2699.14		PHO89	0.122245	0.00439048	0.00711723	1.80205	0.766173	0.483568
PHR1		3664.09	7632.52	4072.29	8429.84	3667.76	1892.04	366.76	325.993	911.239	1161.03	3099.9	1001.07		4002.72	9223.71	4072.29	9354.98	4841.97	4559.52	553.97	515.133	911.239	3003.46	3099.9	2945.41		6009.2	660.114	3016.26		6009.2	2129.01	5058.55		PHR1	0.354292	0.0101115	0.0129764	0.841801	0.0913674	0.0959357
PHR2		737.094	988.52	851.292	1084.84	996.765	367.039	406.76	369.993	731.239	112.032	352.898	19.0662		805.214	1194.6	851.292	1203.9	1315.87	884.506	614.387	584.662	731.239	289.813	352.898	56.098		1042.56	643.429	232.936		1042.56	2075.2	390.657		PHR2	1.99048	0.0209651	0.0248356	0.374707	0.000799786	0.00826644
PIL1		5738.09	7381.52	6175.29	7946.84	2253.76	1895.04	1380.76	1517.99	3434.24	891.032	3230.9	620.066		6268.39	8920.38	6175.29	8818.98	2975.29	4566.75	2085.56	2398.73	3434.24	2305	3230.9	1824.41		6287.52	2639.51	2453.43		6287.52	8512.99	4114.64		PIL1	1.35395	0.0371887	0.0369488	0.654415	0.0308013	0.0456096
PIR1		7471.09	1993.52	8155.29	2080.84	3470.76	2936.04	1139.76	1187.99	2107.24	2226.03	4176.9	988.066		8161.55	2409.12	8155.29	2309.21	4581.91	7075.4	1721.54	1877.26	2107.24	5758.49	4176.9	2907.16		5448.75	1902.01	4280.85		5448.75	6134.41	7179.4		PIR1	1.12584	0.0662005	0.0556084	1.31762	0.518169	0.356241
PLB5		231.094	408.52	263.292	427.844	371.765	129.039	54.7602	48.9927	99.239	36.0317	140.898	12.0662		252.451	493.687	263.292	474.798	490.783	310.963	82.7121	77.4181	99.239	93.2098	140.898	35.502		380.996	86.4564	89.8699		380.996	278.841	150.72		PLB5	0.731874	0.00407253	0.0069685	0.395596	0.00523363	0.0174759
POL1		61.094	130.52	70.2919	119.844	49.7649	24.0385	22.7602	13.9927	25.239	1	1	1		66.7401	157.731	70.2919	132.996	65.6968	57.9291	34.378	22.1112	25.239	1	1	1		91.8975	27.2427	1		91.8975	87.8638	1		POL1	0.956107	0.0384528	0.0377983	0.0108817	0.00882871	0.0198346
PRA1		2050.09	23608.5	2497.29	26134.8	1580.76	1155.04	66.7602	85.9927	803.239	735.032	1674.9	227.066		2239.56	28530.3	2497.29	29003	2086.84	2783.46	100.837	135.885	803.239	1901.44	1674.9	668.091		11190.1	346.654	1414.81		11190.1	1118.03	2372.77		PRA1	0.099913	0.224528	0.139237	0.212043	0.268948	0.20709
RBR1		90.094	84.5205	129.292	73.8437	162.765	40.0385	16.7602	19.9927	134.239	36.0317	37.8979	1		98.4203	102.141	129.292	81.9478	214.873	96.4866	25.3153	31.5924	134.239	93.2098	37.8979	2.94228		120.527	63.7156	44.6833		120.527	205.497	74.9382		RBR1	1.70499	0.170336	0.114263	0.621756	0.0598583	0.0705473
RBR2		57.094	116.52	50.2919	147.844	156.765	116.039	348.76	256.993	619.239	45.0317	324.898	58.0662		62.3705	140.812	50.2919	164.069	206.952	279.635	526.782	406.099	619.239	116.492	324.898	170.847		150.688	517.373	204.079		150.688	1668.64	342.26		RBR2	11.0735	0.000846971	0.00244571	2.27131	0.44637	0.314364
RBT1		42.094	25.5205	58.2919	32.8437	22.7649	6.03852	1	1	1	1	1	1		45.9842	30.8408	58.2919	36.4482	30.0529	14.5519	1	1	1	1	1	1		36.0283	1	1		36.0283	1	1		RBT1	0.0895189	0.00576118	0.00844976	0.0277559	0.00576118	0.0174759
RBT5		6645.09	37538.5	7578.29	39023.8	13588.8	7244.04	2613.76	2798.99	7227.24	4896.03	14576.9	4933.07		7259.22	45364.4	7578.29	43306.6	17939.1	17457	3947.93	4422.96	7227.24	12665.5	14576.9	14514.4		23150.8	5199.38	13918.9		23150.8	16769.1	23343.4		RBT5	0.724345	0.122247	0.0872748	1.00832	0.395524	0.281994
RCT1		3097.09	9731.52	3670.29	10665.8	3910.76	2104.04	325.76	293.993	555.239	525.032	2882.9	456.066		3383.32	11760.3	3670.29	11836.4	5162.77	5070.41	492.042	464.567	555.239	1358.2	2882.9	1341.87		6813.91	503.949	1860.99		6813.91	1625.35	3121.06		RCT1	0.238533	0.0311491	0.0327066	0.458042	0.0750455	0.084153
RFG1		576.094	758.52	555.292	782.844	506.765	253.039	851.76	698.993	1377.24	184.032	643.898	89.0662		629.335	916.653	555.292	868.758	669.002	609.784	1286.53	1104.55	1377.24	476.069	643.898	262.057		708.137	1256.11	460.675		708.137	4051.22	772.596		RFG1	5.72095	0.00110125	0.00299267	1.09103	0.0673473	0.0765505
RFX2		277.094	355.52	294.292	413.844	239.765	99.0385	7.76023	1	11.239	26.0317	83.8979	4.06618		302.702	429.638	294.292	459.261	316.524	238.668	11.7214	1	11.239	67.341	83.8979	11.9638		340.181	7.9868	54.4009		340.181	25.7592	91.2355		RFX2	0.075722	0.000335936	0.00110847	0.268197	0.00102235	0.00826644
RHR2		1739.09	752.52	2011.29	852.844	1211.76	544.039	212.76	229.993	965.239	482.032	738.898	123.066		1899.82	909.402	2011.29	946.44	1599.7	1311.05	321.362	363.434	965.239	1246.96	738.898	362.095		1446.28	550.012	782.651		1446.28	1773.91	1312.58		RHR2	1.22653	0.0239557	0.0273272	0.907554	0.0821587	0.0870581
RIM101		7090.09	4789.52	8296.29	4943.84	7170.76	3828.04	1106.76	1027.99	1501.24	1511.03	3124.9	1566.07		7745.34	5788.02	8296.29	5486.41	9466.44	9224.98	1671.7	1624.43	1501.24	3908.87	3124.9	4607.8		7667.91	1599.12	3880.52		7667.91	5157.52	6508.01		RIM101	0.67261	0.000547437	0.00168599	0.848732	0.00868341	0.0198346
RNR22		5482.09	3580.52	6264.29	3989.84	4644.76	2301.04	767.76	791.993	1160.24	221.032	586.898	180.066		5988.74	4326.97	6264.29	4427.71	6131.75	5545.15	1159.66	1251.51	1160.24	571.784	586.898	529.804		5447.44	1190.47	562.829		5447.44	3839.52	943.918		RNR22	0.70483	7.55903e-05	0.000436532	0.173277	3.08807e-05	0.00178336
ROB1		354.094	395.52	392.292	418.844	293.765	174.039	770.76	635.993	1227.24	40.0317	122.898	21.0662		386.818	477.977	392.292	464.81	387.812	419.406	1164.19	1004.99	1227.24	103.557	122.898	61.9825		421.519	1132.14	96.1459		421.519	3651.4	161.246		ROB1	8.66248	1.93073e-06	2.9737e-05	0.382535	6.16474e-06	0.000712027
RPN4		479.094	351.52	522.292	361.844	512.765	276.039	747.76	951.993	1289.24	622.032	1499.9	393.066		523.371	424.804	522.292	401.555	676.923	665.21	1129.45	1504.34	1289.24	1609.13	1499.9	1156.51		535.692	1307.67	1421.84		535.692	4217.54	2384.57		RPN4	7.87306	0.000109569	0.000506352	4.45138	0.00010377	0.00239709
RTA3		7.09399	14.5205	21.2919	2.84374	1.76489	1	1	1	1	1	1	1		7.74959	17.5476	21.2919	3.15583	2.32991	2.40985	1	1	1	1	1	1		9.08079	1	1		9.08079	1	1		RTA3	0.355169	0.148968	0.103494	0.110123	0.148968	0.137647
SAP1		79.094	75.5205	67.2919	61.8437	52.7649	12.0385	0.760229	3.99268	6.23903	12.0317	86.8979	1		86.4037	91.2646	67.2919	68.6308	69.6572	29.011	1.14828	6.30922	6.23903	31.1246	86.8979	1		68.7099	4.56551	39.6742		68.7099	14.7248	66.5374		SAP1	0.214304	0.00179236	0.00424661	0.968381	0.210109	0.174587
SAP10		8.09399	22.5205	13.2919	25.8437	14.7649	1	7.76023	1	18.239	1	1	1		8.84201	27.2154	13.2919	28.68	19.4918	2.40985	11.7214	1.5802	18.239	1	1	1		16.6552	10.5135	1		16.6552	33.9084	1		SAP10	2.03591	0.407556	0.22283	0.0600415	0.0396937	0.0552364
SAP2		6.09399	1.52046	4.29192	9.84374	1	1	20.7602	38.9927	320.239	1	1	1		6.65718	1.83743	4.29192	10.9241	1.32014	2.40985	31.3571	61.6161	320.239	1	1	1		4.57343	137.737	1		4.57343	444.233	1		SAP2	97.1335	0.0621043	0.0536303	0.218654	0.147681	0.137558
SAP4		2636.09	2643.52	2649.29	2853.84	2222.76	562.039	1	1	1	439.032	1159.9	56.0662		2879.72	3194.63	2649.29	3167.04	2934.37	1354.43	1	1	1	1135.73	1159.9	164.962		2696.58	1	820.195		2696.58	1	1375.55		SAP4	0.00119604	0.000315539	0.00107971	0.510108	0.00488017	0.0173033
SAP5		8826.09	13279.5	9586.29	14592.8	8715.76	2864.04	1	1	1	5960.03	14954.9	4847.07		9641.78	16048	9586.29	16194.3	11506.1	6901.89	1	1	1	15417.9	14954.9	14261.4		11646.4	1	14878.1		11646.4	1	24952		SAP5	0.000276929	0.00128565	0.00335977	2.14246	0.195869	0.166344
SAP6		2719.09	2945.52	2925.29	3304.84	1271.76	405.039	1	1	1	91.0317	398.898	28.0662		2970.39	3559.59	2925.29	3667.54	1678.91	976.08	1	1	1	235.489	398.898	82.5785		2629.63	1	238.988		2629.63	1	400.806		SAP6	0.00122649	0.00463273	0.00730352	0.152419	0.00762037	0.0189681
SAP9		2890.09	3583.52	3193.29	3925.84	3883.76	1905.04	509.76	516.993	910.239	658.032	2973.9	407.066		3157.19	4330.6	3193.29	4356.69	5127.13	4590.85	769.963	816.951	910.239	1702.25	2973.9	1197.7		4125.96	832.384	1957.95		4125.96	2684.62	3283.67		SAP9	0.650666	0.000218598	0.00085932	0.795857	0.00761922	0.0189681
SCW11		224.094	85.5205	237.292	121.844	192.765	94.0385	103.76	61.9927	170.239	6.03166	89.8979	1		244.804	103.349	237.292	135.216	254.477	226.618	156.724	97.9607	170.239	15.6032	89.8979	1		200.293	141.641	35.5004		200.293	456.824	59.5375		SCW11	2.28078	0.195915	0.127483	0.297253	0.00599491	0.0174759
SCW4		35.094	73.5205	26.2919	93.8437	123.765	70.0385	674.76	454.993	810.239	134.032	399.898	89.0662		38.3373	88.8476	26.2919	104.143	163.387	168.782	1019.19	718.978	810.239	346.725	399.898	262.057		98.2982	849.468	336.227		98.2982	2739.72	563.884		SCW4	27.8715	1.14885e-05	0.000151668	5.73647	0.00107356	0.00826644
SEF1		311.094	274.52	342.292	308.844	649.765	269.039	213.76	272.993	337.239	284.032	805.898	118.066		339.845	331.751	342.292	342.738	857.783	648.341	322.872	431.382	337.239	734.758	805.898	347.383		477.125	363.831	629.346		477.125	1173.44	1055.47		SEF1	2.45939	0.430992	0.234257	2.21215	0.381607	0.275473
SEF2		143.094	239.52	132.292	248.844	238.765	68.0385	213.76	166.993	437.239	226.032	412.898	18.0662		156.318	289.455	132.292	276.153	315.204	163.962	322.872	263.881	437.239	584.718	412.898	53.1557		222.231	341.331	350.257		222.231	1100.87	587.415		SEF2	4.95371	0.079994	0.062598	2.64327	0.294904	0.224088
SGA1		139.094	112.52	121.292	109.844	194.765	62.0385	38.7602	32.9927	101.239	68.0317	210.898	1		151.949	135.978	121.292	121.899	257.118	149.503	58.545	52.135	101.239	175.99	210.898	1		156.29	70.6397	129.296		156.29	227.828	216.842		SGA1	1.45773	0.0322999	0.0331612	1.38744	0.621913	0.417622
SIN3		304.094	302.52	389.292	368.844	218.765	119.039	236.76	228.993	468.239	63.0317	276.898	50.0662		332.198	365.588	389.292	409.323	288.801	286.864	357.612	361.854	468.239	163.056	276.898	147.309		345.344	395.902	195.754		345.344	1276.87	328.298		SIN3	3.69738	0.233851	0.141228	0.95064	0.00793535	0.0190944
SIT1		752.094	2431.52	837.292	2660.84	1630.76	723.039	251.76	314.993	584.239	283.032	1741.9	284.066		821.601	2938.43	837.292	2952.86	2152.84	1742.41	380.269	497.751	584.239	732.171	1741.9	835.801		1907.57	487.42	1103.29		1907.57	1572.03	1850.32		SIT1	0.824102	0.042171	0.038202	0.969988	0.227843	0.185023
SMC2		49.094	83.5205	39.2919	103.844	29.7649	1	26.7602	10.9927	27.239	1	1	1		53.6311	100.932	39.2919	115.24	39.2939	2.40985	40.4197	17.3706	27.239	1	1	1		58.4666	28.3431	1		58.4666	91.4128	1		SMC2	1.56351	0.278255	0.158708	0.0171038	0.0569977	0.0678683
SOD4		243.094	294.52	241.292	364.844	238.765	117.039	43.7602	56.9927	238.239	85.0317	316.898	8.06618		265.56	355.921	241.292	404.884	315.204	282.045	66.0972	90.0597	238.239	219.967	316.898	23.7329		310.818	131.465	186.866		310.818	424.004	313.392		SOD4	1.36416	0.00950965	0.0123759	1.00828	0.107645	0.109061
SOD5		40524.1	50504.5	45886.3	54901.8	31343.8	18527	291.76	321.993	561.239	2538.03	9152.9	2265.07		44269.2	61033.5	45886.3	60927.1	41378.3	44647.3	440.687	508.812	561.239	6565.6	9152.9	6664.45		49690.3	503.579	7460.98		49690.3	1624.15	12512.8		SOD5	0.0326855	3.49404e-05	0.000293496	0.251816	9.68675e-05	0.00239709
SOD6		1058.09	244.52	1220.29	255.844	1130.76	619.039	60.7602	57.9927	51.239	109.032	93.8979	11.0662		1155.88	295.497	1220.29	283.922	1492.77	1491.79	91.7747	91.6399	51.239	282.053	93.8979	32.5598		990.025	78.2179	136.17		990.025	252.27	228.37		SOD6	0.254812	0.0295371	0.0317352	0.230671	0.0394693	0.0552364
SOG2		115.094	227.52	111.292	217.844	140.765	60.0385	89.7602	61.9927	126.239	18.0317	100.898	1		125.731	274.953	111.292	241.751	185.83	144.684	135.578	97.9607	126.239	46.6459	100.898	1		180.707	119.926	49.5146		180.707	386.787	83.0407		SOG2	2.14041	0.173604	0.114579	0.459533	0.0199459	0.0349053
SSB1		1176.09	1355.52	1375.29	1445.84	814.765	331.039	477.76	390.993	1868.24	192.032	526.898	389.066		1284.79	1638.11	1375.29	1604.52	1075.61	797.752	721.629	617.846	1868.24	496.764	526.898	1144.74		1296.01	1069.24	722.801		1296.01	3448.53	1212.21		SSB1	2.66088	0.507791	0.271213	0.935336	0.0458321	0.0594787
STF2		36762.1	10997.5	42001.3	12288.8	25707.8	16907	7445.76	6707.99	8572.24	4636.03	11532.9	2467.07		40159.6	13290.2	42001.3	13637.5	33937.9	40743.4	11246.4	10600	8572.24	11992.9	11532.9	7258.79		30628.3	10139.5	10261.5		30628.3	32702.2	17209.6		STF2	1.06771	0.0399044	0.0379327	0.561884	0.0415756	0.0564939
STP2		3321.09	2612.52	3716.29	2880.84	5152.76	2712.04	1527.76	1540.99	2337.24	1740.03	3803.9	1084.07		3628.02	3157.17	3716.29	3197	6802.39	6535.59	2307.59	2435.07	2337.24	4501.27	3803.9	3189.62		4506.08	2359.97	3831.6		4506.08	7611.41	6425.95		STP2	1.68914	0.0715798	0.0575128	1.42606	0.537829	0.36757
SUT1		236.094	196.52	204.292	211.844	236.765	91.0385	861.76	763.993	1479.24	182.032	383.898	93.0662		257.913	237.49	204.292	235.093	312.564	219.389	1301.64	1207.26	1479.24	470.895	383.898	273.826		244.457	1329.38	376.207		244.457	4287.54	630.934		SUT1	17.539	2.71883e-07	2.5124e-05	2.58097	0.0194785	0.0349053
TEC1		10612.1	3236.52	11927.3	3676.84	14003.8	7019.04	58.7602	42.9927	102.239	2318.03	7699.9	2668.07		11592.8	3911.25	11927.3	4080.36	18487	16914.8	88.7539	67.9369	102.239	5996.49	7699.9	7850.19		11152.3	86.3099	7182.19		11152.3	278.368	12045.2		TEC1	0.0249607	0.0198885	0.0238662	1.08007	0.31969	0.237361
TPK1		109.094	119.52	150.292	150.844	373.765	126.039	109.76	145.993	215.239	233.032	736.898	155.066		119.176	144.437	150.292	167.398	493.423	303.733	165.786	230.697	215.239	602.827	736.898	456.248		229.743	203.908	598.657		229.743	657.646	1004.01		TPK1	2.86253	0.776169	0.392677	4.37012	0.00832974	0.0196344
TPK2		418.094	249.52	422.292	301.844	187.765	121.039	128.76	138.993	235.239	55.0317	150.898	1		456.733	301.539	422.292	334.97	247.877	291.684	194.485	219.636	235.239	142.361	150.898	1		342.516	216.453	98.0862		342.516	698.109	164.5		TPK2	2.03818	0.0366936	0.0368531	0.48027	0.00391305	0.0155847
TPS2		6723.09	5434.52	7851.29	5929.84	5040.76	2397.04	260.76	283.993	395.239	1442.03	2520.9	729.066		7344.43	6567.48	7851.29	6580.62	6654.53	5776.49	393.863	448.765	395.239	3730.37	2520.9	2145.11		6795.81	412.622	2798.8		6795.81	1330.8	4693.85		TPS2	0.195826	1.48043e-06	2.9328e-05	0.690698	0.000133902	0.00257761
TRR1		440.094	656.52	578.292	732.844	538.765	154.039	324.76	225.993	342.239	148.032	331.898	41.0662		480.766	793.389	578.292	813.27	711.247	371.209	490.531	357.113	342.239	382.941	331.898	120.828		624.696	396.628	278.556		624.696	1279.21	467.165		TRR1	2.04774	0.0786213	0.0620907	0.747828	0.0224642	0.0369651
TRX1		1046.09	1093.52	987.292	1272.84	1023.76	445.039	684.76	561.993	1249.24	338.032	1076.9	183.066		1142.77	1321.49	987.292	1412.53	1351.52	1072.47	1034.29	888.06	1249.24	874.45	1076.9	538.631		1214.68	1057.2	829.993		1214.68	3409.69	1391.98		TRX1	2.80707	0.241797	0.144142	1.14596	0.0327674	0.047308
TTR1		755.094	550.52	813.292	640.844	361.765	176.039	245.76	195.993	300.239	68.0317	185.898	20.0662		824.878	665.29	813.292	711.174	477.581	424.226	371.206	309.707	300.239	175.99	185.898	59.0402		652.74	327.051	140.309		652.74	1054.81	235.312		TTR1	1.61597	0.0150258	0.0185118	0.360499	0.00171261	0.00977055
TUP1		579.094	696.52	611.292	690.844	402.765	194.039	271.76	221.993	498.239	123.032	332.898	130.066		632.612	841.728	611.292	766.661	531.707	467.603	410.478	350.792	498.239	318.269	332.898	382.691		641.934	419.836	344.619		641.934	1354.06	577.959		TUP1	2.10935	0.0406871	0.0379327	0.900341	0.0100628	0.0219293
TYE7		9360.09	4005.52	9856.29	4366.84	7906.76	3827.04	987.76	1394.99	1580.24	777.032	2214.9	656.066		10225.1	4840.57	9856.29	4846.09	10438.1	9222.57	1491.95	2204.36	1580.24	2010.09	2214.9	1930.33		8238.12	1758.85	2051.77		8238.12	5672.68	3441.02		TYE7	0.68859	0.00483414	0.00744451	0.417695	0.00600091	0.0174759
UCF1		56702.1	52377.5	61026.3	56435.8	70298.8	38733	30936.8	33270	42453.2	20052	51940.9	13306.1		61942.4	63296.9	61026.3	62629.4	92804.4	93340.6	46728.2	52573.2	42453.2	51872.3	51940.9	39150.1		72506.7	47251.5	47654.5		72506.7	152396	79921.1		UCF1	2.10183	0.035553	0.0361	1.10226	0.0408202	0.0561278
UGA32		42.094	111.52	37.2919	131.844	61.7649	25.0385	69.7602	53.9927	76.239	1	1	1		45.9842	134.77	37.2919	146.313	81.5385	60.339	105.369	85.3191	76.239	1	1	1		84.3727	88.9756	1		84.3727	286.966	1		UGA32	3.40117	0.874751	0.434554	0.0118522	0.0193184	0.0349053
UGP1		1717.09	1133.52	1891.29	1202.84	1217.76	497.039	222.76	219.993	422.239	262.032	668.898	210.066		1875.78	1369.83	1891.29	1334.85	1607.62	1197.79	336.466	347.632	422.239	677.846	668.898	618.073		1546.19	368.779	654.939		1546.19	1189.39	1098.4		UGP1	0.769239	0.000278725	0.000990457	0.710386	0.00142919	0.00868796
UME6		470.094	385.52	429.292	397.844	500.765	213.039	1	1	1	30.0317	275.898	3.06618		513.539	465.892	429.292	441.505	661.081	513.39	1	1	1	77.6885	275.898	9.02155		504.117	1	120.869		504.117	1	202.709		UME6	0.00639776	2.21086e-05	0.000229152	0.402108	0.0011679	0.00843074
UPC2		247.094	470.52	283.292	507.844	771.765	313.039	96.7602	94.9927	150.239	74.0317	261.898	8.06618		269.93	568.612	283.292	563.578	1018.84	754.374	146.151	150.107	150.239	191.512	261.898	23.7329		576.438	148.832	159.047		576.438	480.017	266.738		UPC2	0.832729	0.0406126	0.0379327	0.462735	0.0502451	0.0624012
WH11		83155.1	10182.5	89730.3	10881.8	10146.8	17370	399.76	587.993	3563.24	3677.03	5028.9	1303.07		90840.1	12305.3	89730.3	12076.1	13395.2	41859.1	603.814	929.145	3563.24	9512.07	5028.9	3833.98		43367.7	1698.73	6124.98		43367.7	5478.78	10272.2		WH11	0.126333	0.109833	0.0806258	0.236863	0.146105	0.137558
YHB1		13174.1	5644.52	14172.3	6081.84	17031.8	5851.04	20301.8	12992	16605.2	4518.03	9199.9	3473.07		14391.6	6821.26	14172.3	6749.3	22484.4	14100.1	30664.6	20529.9	16605.2	11687.6	9199.9	10218.7		13119.8	22599.9	10368.8		13119.8	72889.7	17389.4		YHB1	5.55569	0.070497	0.0572163	1.32543	0.461694	0.321239
YWP1		2396.09	214.52	2646.29	257.844	385.765	314.039	362.76	387.993	401.239	1	1	1		2617.54	259.243	2646.29	286.141	509.265	756.784	547.928	613.105	401.239	1	1	1		1179.21	520.757	1		1179.21	1679.56	1		YWP1	1.42431	0.366612	0.202844	0.000848025	0.127219	0.124524
ZAP1		203.094	791.52	233.292	928.844	204.765	58.0385	68.7602	120.993	215.239	48.0317	142.898	1		221.863	956.533	233.292	1030.78	270.319	139.864	103.858	191.192	215.239	124.252	142.898	1		475.442	170.097	89.3835		475.442	548.598	149.905		ZAP1	1.15387	0.248611	0.147254	0.315295	0.156726	0.141421
ZCF20		214.094	442.52	209.292	496.844	214.765	90.0385	135.76	106.993	255.239	48.0317	201.898	10.0662		233.88	534.775	209.292	551.37	283.52	216.979	205.058	169.07	255.239	124.252	201.898	29.6175		338.303	209.789	118.589		338.303	676.615	198.886		ZCF20	2.00003	0.22885	0.139853	0.587892	0.0670877	0.0765505
ZCF3		150.094	114.52	149.292	118.844	182.765	84.0385	157.76	118.993	211.239	97.0317	260.898	23.0662		163.965	138.395	149.292	131.886	241.276	202.52	238.288	188.032	211.239	251.01	260.898	67.8671		171.222	212.52	193.258		171.222	685.422	324.113		ZCF3	4.00311	0.171889	0.114263	1.89293	0.66213	0.432068
ZCF31		81.094	206.52	94.2919	233.844	126.765	64.0385	53.7602	59.9927	84.239	6.03166	81.8979	1		88.5885	249.575	94.2919	259.507	167.348	154.323	81.2017	94.8003	84.239	15.6032	81.8979	1		168.939	86.747	32.8337		168.939	279.778	55.0653		ZCF31	1.65609	0.103705	0.078544	0.325948	0.0227232	0.0369651
ZCF34		40.094	67.5205	33.2919	80.8437	28.7649	1	18.7602	16.9927	48.239	1	1	1		43.7994	81.5968	33.2919	89.716	37.9738	2.40985	28.3362	26.8518	48.239	2.58689	1	1		48.1313	34.4757	1.52896		48.1313	111.192	2.56422		ZCF34	2.31017	0.515499	0.273748	0.0532755	0.0475436	0.0603438
ZCF39		560.094	683.52	621.292	728.844	807.765	396.039	116.76	137.993	240.239	203.032	433.898	44.0662		611.857	826.017	621.292	808.831	1066.37	954.392	176.359	218.056	240.239	525.22	433.898	129.655		814.792	211.551	362.924		814.792	682.299	608.659		ZCF39	0.837391	0.000833909	0.00244571	0.747011	0.0114503	0.0236162
ZCF7		10.094	19.5205	2.29192	19.8437	5.76489	1	20.7602	1	25.239	1	1	1		11.0268	23.59	2.29192	22.0215	7.61048	2.40985	31.3571	1	25.239	1	1	1		11.4918	19.1987	1		11.4918	61.92	1		ZCF7	5.38821	0.381844	0.210014	0.0870188	0.103336	0.105622
ZRT1		1367.09	18363.5	1464.29	20479.8	1250.76	910.039	45.7602	69.9927	402.239	433.032	1057.9	147.066		1493.44	22191.9	1464.29	22727.4	1651.19	2193.05	69.1181	110.602	402.239	1120.2	1057.9	432.709		8620.21	193.986	870.27		8620.21	625.649	1459.53		ZRT1	0.0725793	0.230061	0.139853	0.169315	0.265946	0.20709
ZRT2		3436.09	14009.5	3815.29	15876.8	1877.76	901.039	1579.76	2281.99	3831.24	906.032	1555.9	206.066		3753.65	16930.2	3815.29	17619.3	2478.92	2171.36	2386.13	3606	3831.24	2343.8	1555.9	606.304		7794.77	3274.46	1502		7794.77	10560.8	2519		ZRT2	1.35486	0.340261	0.190546	0.323165	0.197562	0.166558
orf19.1424		85.094	175.52	113.292	209.844	78.7649	30.0385	95.7602	74.9927	140.239	37.0317	101.898	1.06618		92.9582	212.112	113.292	232.873	103.981	72.3882	144.64	118.503	140.239	95.7967	101.898	3.137		137.934	134.461	66.9439		137.934	433.665	112.271		orf19.1424	3.14401	0.934092	0.461551	0.813949	0.161018	0.144167
orf19.1534		730.094	3166.52	744.292	3451.84	887.765	370.039	41.7602	68.9927	119.239	268.032	579.898	51.0662		797.568	3826.66	744.292	3830.67	1171.98	891.736	63.0764	109.022	119.239	693.368	579.898	150.251		1877.15	97.1125	474.505		1877.15	313.209	795.791		orf19.1534	0.166853	0.0906909	0.069832	0.423936	0.168791	0.147692
orf19.1691		65.094	138.52	41.2919	165.844	51.7649	1	146.76	154.993	531.239	1	1	1		71.1098	167.399	41.2919	184.044	68.3371	2.40985	221.673	244.919	531.239	1	1	1		89.0986	332.61	1		89.0986	1072.74	1		orf19.1691	12.0399	0.0167871	0.0204096	0.0112235	0.0788083	0.0862394
orf19.1862		1561.09	1370.52	1832.29	1435.84	828.765	765.039	488.76	541.993	1006.24	299.032	878.898	126.066		1705.37	1656.24	1832.29	1593.42	1094.09	1843.62	738.244	856.456	1006.24	773.561	878.898	370.922		1620.84	866.979	674.46		1620.84	2796.2	1131.13		orf19.1862	1.72515	0.00328271	0.00606643	0.69787	0.00177646	0.00977055
orf19.2125		2647.09	4152.52	2939.29	4546.84	2619.76	1426.04	1859.76	1684.99	1898.24	744.032	3189.9	356.066		2891.73	5018.22	2939.29	5045.84	3458.46	3436.53	2809.06	2662.62	1898.24	1924.73	3189.9	1047.65		3798.35	2456.64	2054.09		3798.35	7923.2	3444.91		orf19.2125	2.08596	0.066159	0.0556084	0.906949	0.044939	0.0589824
orf19.3615		394.094	556.52	447.292	629.844	513.765	261.039	180.76	147.993	225.239	84.0317	844.898	1		430.515	672.541	447.292	698.967	678.243	629.063	273.028	233.858	225.239	217.38	844.898	1		592.77	244.041	354.426		592.77	787.087	594.407		orf19.3615	1.32781	0.00205256	0.00462586	1.00276	0.229076	0.185023
orf19.409		5497.09	3150.52	5863.29	3411.84	5348.76	2837.04	2370.76	2400.99	3755.24	1243.03	4289.9	1977.07		6005.12	3807.33	5863.29	3786.28	7061.13	6836.82	3580.89	3794.04	3755.24	3215.58	4289.9	5817.08		5560	3710.06	4440.85		5560	11965.7	7447.73		orf19.409	2.15211	0.0691668	0.0572163	1.33952	0.296957	0.224174
orf19.411		319.094	403.52	374.292	451.844	572.765	230.039	41.7602	50.9927	70.239	17.0317	222.898	25.0662		348.584	487.644	374.292	501.432	756.132	554.357	63.0764	80.5785	70.239	44.059	222.898	73.7516		503.74	71.298	113.57		503.74	229.952	190.467		orf19.411	0.456488	0.00168524	0.0040977	0.378106	0.00447524	0.0166739
orf19.4174		165.094	289.52	190.292	302.844	321.765	128.039	35.7602	39.9927	66.239	1	1	1		180.352	349.878	190.292	336.08	424.776	308.553	54.0137	63.1963	66.239	1	1	1		298.322	61.1497	1		298.322	197.221	1		orf19.4174	0.661102	0.00432486	0.00711723	0.00335209	0.00125278	0.00849302
orf19.449		6892.09	4189.52	8012.29	4451.84	6776.76	3306.04	1243.76	1361.99	1656.24	3345.03	6331.9	2480.07		7529.04	5062.93	8012.29	4940.42	8946.3	7967.04	1878.63	2152.22	1656.24	8653.22	6331.9	7297.04		7076.34	1895.69	7427.39		7076.34	6114.03	12456.4		orf19.449	0.86401	0.00130899	0.00335977	1.76029	0.757324	0.483568
orf19.4706		574.094	1127.52	606.292	1232.84	846.765	348.039	188.76	189.993	299.239	105.032	848.898	6.06618		627.15	1362.58	606.292	1368.14	1117.85	838.719	285.111	300.226	299.239	271.705	848.898	17.8484		986.789	294.859	379.484		986.789	950.984	636.431		orf19.4706	0.963715	0.0123805	0.0156707	0.644951	0.0537074	0.0652969
orf19.5517		149.094	20.5205	138.292	46.8437	78.7649	20.0385	28.7602	29.9927	63.239	42.0317	53.8979	1		162.873	24.7985	138.292	51.9847	103.981	48.2897	43.4406	47.3944	63.239	108.731	53.8979	1		88.3698	51.358	54.543		88.3698	165.641	91.4739		orf19.5517	1.87441	0.302408	0.171426	1.03513	0.412056	0.291978
orf19.5626		5825.09	1096.52	6024.29	1207.84	3689.76	2371.04	1486.76	1631.99	2353.24	1175.03	1402.9	357.066		6363.44	1325.12	6024.29	1340.4	4871.02	5713.84	2245.66	2578.87	2353.24	3039.67	1402.9	1050.59		4273.02	2392.59	1831.05		4273.02	7716.63	3070.85		orf19.5626	1.8059	0.219461	0.137015	0.718661	0.135914	0.130817
orf19.5848		124.094	211.52	138.292	247.844	234.765	115.039	44.7602	33.9927	52.239	36.0317	133.898	10.0662		135.562	255.617	138.292	275.044	309.923	277.225	67.6077	53.7152	52.239	93.2098	133.898	29.6175		231.944	57.854	85.5751		231.944	186.592	143.518		orf19.5848	0.804469	0.00636251	0.0089075	0.61876	0.0209772	0.0356303
orf19.6578		2718.09	1731.52	3036.29	1974.84	3716.76	2029.04	93.7602	97.9927	172.239	741.032	1250.9	646.066		2969.29	2092.5	3036.29	2191.57	4906.66	4889.67	141.619	154.848	172.239	1916.97	1250.9	1900.91		3347.67	156.235	1689.59		3347.67	503.893	2833.6		orf19.6578	0.150521	0.00387736	0.0069685	0.846442	0.067603	0.0765505
orf19.6660		352.094	178.52	386.292	175.844	248.765	73.0385	62.7602	48.9927	177.239	44.0317	242.898	5.06618		384.634	215.738	386.292	195.142	328.405	176.012	94.7956	77.4181	177.239	113.905	242.898	14.9061		281.037	116.484	123.903		281.037	375.687	207.797		orf19.6660	1.33679	0.0311163	0.0327066	0.739394	0.0658296	0.0765505
orf19.670.2		20156.1	19107.5	22848.3	21019.8	18914.8	12845	15646.8	13904	18452.2	8794.03	28903.9	12440.1		22018.9	23091	22848.3	23326.7	24970.2	30954.6	23633.5	21971.1	18452.2	22749.2	28903.9	36602.1		24534.9	21352.3	29418.4		24534.9	68865.7	49337.5		orf19.670.2	2.80684	0.192275	0.126001	2.01091	0.179945	0.155102
ARP3		114.094	273.52	130.292	316.844	106.765	47.0385	53.7602	69.9927	142.239	8.03166	89.8979	5.06618		124.638	330.543	130.292	351.616	140.945	113.356	81.2017	110.602	142.239	20.777	89.8979	14.9061		198.565	111.348	41.8603		198.565	359.12	70.2038		ARP3	1.80858	0.236096	0.141658	0.353556	0.0550486	0.0662303
CLN3		810.094	1304.52	860.292	1421.84	1048.76	564.039	199.76	212.993	693.239	378.032	1656.9	189.066		884.961	1576.48	860.292	1577.89	1384.52	1359.25	301.726	336.571	693.239	977.925	1656.9	556.285		1273.9	443.845	1063.7		1273.9	1431.5	1783.93		CLN3	1.12372	0.0055662	0.00829543	1.40037	0.48578	0.335974
CMK2		183.094	504.52	189.292	557.844	149.765	86.0385	90.7602	104.993	229.239	21.0317	153.898	1		200.015	609.7	189.292	619.065	197.711	207.34	137.088	165.909	229.239	54.4065	153.898	1		337.187	177.412	69.7681		337.187	572.193	117.008		CMK2	1.69696	0.25745	0.148677	0.347012	0.0818181	0.0870581
YRA1		271.094	579.52	296.292	518.844	287.765	98.0385	503.76	421.993	653.239	149.032	371.898	140.066		296.148	700.336	296.292	575.785	379.891	236.258	760.9	666.832	653.239	385.528	371.898	412.113		414.118	693.657	389.846		414.118	2237.2	653.81		YRA1	5.40231	0.0412063	0.0379327	1.5788	0.83171	0.519257
orf19.3456		1.09399	39.5205	9.29192	22.8437	6.76489	1	0.760229	1	10.239	1	1	1		1.19509	47.7595	9.29192	25.3508	8.93063	2.40985	1.14828	1	10.239	1	1	1		15.823	4.1291	1		15.823	13.3173	1		orf19.3456	0.841642	0.31723	0.178732	0.0631993	0.207466	0.17364
Sum		832537	752583	909478	819537	688924	377401	186696	178455	281994	209646	542331	184324														Sum	909477	281989	542293
NF		1.09242	1.20848	1	1.10975	1.32014	2.40985	1.51044	1.5802	1	2.58689	1	2.94228														NF	1	3.22522	1.6771
																									1

## Sheet: RPMI+10%Serum-rob1nrg1
Probe Name		Counts after background subtraction										Normalize count - H			Normalize count - rob1			Normalize count-rob1ΔΔ+nrg1ΔΔ				Avg_Individual replicates				Normalize to WT-Avg				Probe name	rob1ΔΔ/WT			rob1ΔΔ nrg1ΔΔ/wt
		WT_H1	WT_H2	WT_H3	rob1ΔΔ	rob1ΔΔ	rob1ΔΔ	rob1ΔΔ nrg1ΔΔ	rob1ΔΔ nrg1ΔΔ	rob1ΔΔ nrg1ΔΔ		WT_H1	WT_H2	WT_H3	rob1ΔΔ	rob1ΔΔ	rob1ΔΔ	rob1ΔΔ nrg1ΔΔ	rob1ΔΔ nrg1ΔΔ	rob1ΔΔ nrg1ΔΔ		Avg_WT	Avg_rob1ΔΔ	Avg_rob1ΔΔ+nrg1ΔΔ		WT	rob1ΔΔ	rob1ΔΔ nrg1ΔΔ			FC	T-test	FDR	FC	T-test	FDR
ACE2		261.562	241.277	209.498	165.699	154.408	91.6748	86.8667	70.413	61.7421		289.071	248.485	209.498	192.518	154.408	104.732	87.1163	91.3383	61.7421		249.018	150.553	80.0656		249.018	163.592	91.7986		ACE2	0.656949	0.0452775	0.335098	0.368643	0.0024125	0.00116765
ACS1		19954.6	21972.3	19044.5	37567.7	44377.4	46228.7	5363.87	4959.41	6122.74		22053.2	22628.6	19044.5	43648.2	44377.4	52812.9	5379.28	6433.25	6122.74		21242.1	46946.2	5978.42		21242.1	51012.1	6854.52		ACS1	2.40146	0.00121867	0.205647	0.322686	0.000189071	0.000198936
ACS2		2689.56	2871.28	2835.5	3066.7	3618.41	3044.67	9338.87	5239.41	8062.74		2972.42	2957.05	2835.5	3563.05	3618.41	3478.32	9365.7	6796.46	8062.74		2921.66	3553.26	8074.97		2921.66	3861.01	9258.3		ACS2	1.32151	0.000444532	0.00460506	3.16885	0.00226865	0.00113199
ADH5		15924.6	17451.3	21201.5	7251.7	12498.4	8359.67	23129.9	23922.4	23118.7		17599.3	17972.6	21201.5	8425.41	12498.4	9550.32	23196.3	31031.7	23118.7		18924.5	10158	25782.2		18924.5	11037.8	29560.5		ADH5	0.583257	0.00627448	0.00500876	1.56202	0.0747438	0.024949
AHR1		711.562	709.277	538.498	504.699	649.408	446.675	730.867	472.413	778.742		786.397	730.465	538.498	586.386	649.408	510.293	732.967	612.805	778.742		685.12	582.029	708.171		685.12	632.438	811.949		AHR1	0.923106	0.292717	0.292908	1.18512	0.810299	0.211172
ALS1		11885.6	12346.3	15774.5	7829.7	12723.4	7915.67	1446.87	1756.41	1763.74		13135.6	12715.1	15774.5	9096.96	12723.4	9043.08	1451.02	2278.38	1763.74		13875.1	10287.8	1831.05		13875.1	11178.8	2099.38		ALS1	0.805679	0.0815329	0.33005	0.151306	0.000259276	0.000246058
ALS2		78.5622	93.277	125.498	237.699	189.408	121.675	2056.87	895.413	1061.74		86.8246	96.0634	125.498	276.171	189.408	139.005	2062.78	1161.51	1061.74		102.795	201.528	1428.68		102.795	218.982	1638.04		ALS2	2.13028	0.0771108	0.00456513	15.935	0.0141223	0.00551227
ALS3		25020.6	25896.3	20372.5	3172.7	3395.41	3502.67	16114.9	9388.41	17640.7		27652	26669.9	20372.5	3686.21	3395.41	4001.55	16161.2	12178.5	17640.7		24898.1	3694.39	15326.8		24898.1	4014.36	17572.8		ALS3	0.161231	0.000752946	0.00190546	0.70579	0.0269346	0.010028
ALS4		365.562	369.277	260.498	636.699	851.408	725.675	4158.87	1692.41	2704.74		404.008	380.308	260.498	739.751	851.408	829.031	4170.82	2195.36	2704.74		348.271	806.73	3023.64		348.271	876.6	3466.73		ALS4	2.517	0.00121264	0.00160561	9.95412	0.010777	0.00434672
ALS5		137.562	175.277	121.498	83.6989	86.408	70.6748	162.867	74.413	137.742		152.03	180.513	121.498	97.2458	86.408	80.7408	163.335	96.5271	137.742		151.347	88.1315	132.535		151.347	95.7645	151.957		ALS5	0.632749	0.023405	0.0703105	1.00403	0.507337	0.135664
ALS6		5.56224	18.277	1	1	1	1	1	1	1		6.14722	18.823	1	1	1	1	1	1	1		8.65674	1	1		8.65674	1	1		ALS6	0.125522	0.221761	0.121128	0.115517	0.221761	0.0638884
ALS7		501.562	486.277	528.498	456.699	440.408	379.675	558.867	509.413	551.742		554.312	500.803	528.498	530.617	440.408	433.751	560.472	660.8	551.742		527.871	468.259	591.005		527.871	508.814	677.613		ALS7	0.963899	0.16234	0.0132353	1.28367	0.174152	0.0513962
ALS9		45.5622	50.277	1	61.6989	61.408	74.6748	102.867	103.413	92.7421		50.354	51.7789	1	71.685	61.408	85.3105	103.162	134.145	92.7421		34.3776	72.8012	110.017		34.3776	79.1064	126.139		ALS9	2.3011	0.100649	0.0366133	3.66921	0.0220857	0.00841692
AOX2		1981.56	2145.28	2303.5	417.699	315.408	315.675	1	1	1		2189.96	2209.36	2303.5	485.305	315.408	360.635	1	1	1		2234.27	387.116	1		2234.27	420.644	1		AOX2	0.188269	7.42627e-06	0.00461831	0.000447573	3.63923e-07	1.09121e-05
ARG1		438.562	464.277	484.498	114.699	114.408	133.675	30.8667	63.413	33.7421		484.686	478.146	484.498	133.263	114.408	152.714	30.9554	82.2581	33.7421		482.443	133.462	48.9852		482.443	145.021	56.1636		ARG1	0.300596	6.46989e-06	0.235293	0.116415	1.33858e-05	2.95561e-05
ARG81		192.562	215.277	172.498	255.699	234.408	222.675	182.867	122.413	181.742		212.814	221.708	172.498	297.085	234.408	254.39	183.392	158.792	181.742		202.34	261.961	174.642		202.34	284.649	200.235		ARG81	1.40679	0.0671084	0.00413527	0.989596	0.180514	0.0529509
BCR1		702.562	731.277	720.498	681.699	653.408	551.675	692.867	545.413	668.742		776.451	753.122	720.498	792.034	653.408	630.248	694.857	707.499	668.742		750.023	691.897	690.366		750.023	751.821	791.535		BCR1	1.0024	0.334798	0.155229	1.05535	0.0396539	0.0138075
BRG1		2178.56	2446.28	3135.5	1282.7	1656.41	1685.67	2009.87	1852.41	1898.74		2407.68	2519.35	3135.5	1490.31	1656.41	1925.76	2015.64	2402.91	1898.74		2687.51	1690.83	2105.77		2687.51	1837.27	2414.35		BRG1	0.683631	0.0184335	0.000870182	0.89836	0.0999357	0.032904
CAP1		717.562	807.277	657.498	966.699	839.408	798.675	933.867	665.413	1029.74		793.028	831.392	657.498	1123.16	839.408	912.428	936.55	863.161	1029.74		760.639	958.333	943.151		760.639	1041.33	1081.36		CAP1	1.36902	0.119472	0.0163622	1.42165	0.0630187	0.0213294
CAT1		1815.56	1965.28	1782.5	1339.7	1720.41	1077.67	790.867	518.413	598.742		2006.5	2023.98	1782.5	1556.53	1720.41	1231.16	793.139	672.475	598.742		1937.66	1502.7	688.119		1937.66	1632.85	788.958		CAT1	0.842691	0.0563234	0.0118242	0.40717	0.000202728	0.000207558
CDC10		163.562	202.277	143.498	74.6989	159.408	116.675	2408.87	1642.41	2407.74		180.764	208.319	143.498	86.7891	159.408	133.292	2415.79	2130.51	2407.74		177.527	126.497	2318.01		177.527	137.452	2657.7		CDC10	0.774261	0.146246	0.0703105	14.9707	2.36036e-05	4.08005e-05
CDR1		3178.56	3347.28	3967.5	2709.7	3172.41	3508.67	1342.87	982.413	1117.74		3512.85	3447.27	3967.5	3148.27	3172.41	4008.41	1346.72	1274.37	1117.74		3642.54	3443.03	1246.28		3642.54	3741.23	1428.91		CDR1	1.02709	0.574382	0.00391088	0.392284	0.000172248	0.000185262
CDR2		24.5622	24.277	1	21.6989	10.408	1	1	1.41299	1.74211		27.1455	25.0022	1	25.2109	10.408	1	1	1.8329	1.74211		17.7159	12.2063	1.52501		17.7159	13.2635	1.74848		CDR2	0.748676	0.641284	0.186816	0.0986958	0.125679	0.0400189
CHT2		2718.56	2843.28	3098.5	944.699	1208.41	619.675	3993.87	3353.41	3989.74		3004.47	2928.21	3098.5	1097.6	1208.41	707.933	4005.34	4349.98	3989.74		3010.39	1004.65	4115.02		3010.39	1091.66	4718.05		CHT2	0.36263	0.000230462	0.00391088	1.56725	0.000975512	0.000655761
CHT3		772.562	939.277	650.498	1233.7	1114.41	1035.67	15.8667	1.41299	5.74211		853.813	967.335	650.498	1433.38	1114.41	1183.18	15.9123	1.8329	5.74211		823.882	1243.66	7.82911		823.882	1351.37	8.97642		CHT3	1.64025	0.035173	0.000605135	0.0108953	0.000921439	0.000628136
CIT1		16859.6	17534.3	19110.5	46369.7	49980.4	45305.7	778.867	884.413	861.742		18632.7	18058.1	19110.5	53874.8	49980.4	51758.4	781.104	1147.24	861.742		18600.4	51871.2	930.03		18600.4	56363.7	1066.32		CIT1	3.03024	8.97779e-06	0.0366133	0.0573277	6.75671e-07	1.09121e-05
CPH1		304.562	319.277	409.498	153.699	162.408	106.675	594.867	555.413	533.742		336.593	328.815	409.498	178.576	162.408	121.868	596.576	720.471	533.742		358.302	154.284	616.93		358.302	167.646	707.336		CPH1	0.467891	0.00267372	0.0138034	1.97414	0.0129558	0.00509805
CPH2		1358.56	1387.28	1337.5	896.699	1300.41	1004.67	1117.87	857.413	1030.74		1501.44	1428.72	1337.5	1041.83	1300.41	1147.77	1121.08	1112.22	1030.74		1422.55	1163.34	1088.01		1422.55	1264.09	1247.45		CPH2	0.888608	0.0432521	0.037379	0.876912	0.00380746	0.0017385
CRH11		1167.56	1266.28	1084.5	348.699	831.408	465.675	104.867	69.413	107.742		1290.35	1304.1	1084.5	405.137	831.408	531.999	105.168	90.0412	107.742		1226.32	589.515	100.984		1226.32	640.572	115.782		CRH11	0.522354	0.0117554	0.0259554	0.0944145	9.3822e-05	0.000108119
CSA1		9499.56	9951.28	11636.5	8124.7	16533.4	11152.7	9282.87	8500.41	10160.7		10498.6	10248.5	11636.5	9439.71	16533.4	12741.1	9309.54	11026.6	10160.7		10794.6	12904.7	10165.6		10794.6	14022.4	11655.3		CSA1	1.29903	0.370481	0.000328545	1.07974	0.390868	0.106881
CSH1		1233.56	1382.28	1399.5	4925.7	5564.41	6453.67	6178.87	6088.41	6727.74		1363.3	1423.57	1399.5	5722.94	5564.41	7372.85	6196.62	7897.77	6727.74		1395.45	6220.07	6940.71		1395.45	6758.78	7957.82		CSH1	4.84343	0.00112957	0.00461831	5.70268	0.000384238	0.000326265
DAK2		1037.56	1215.28	1145.5	1211.7	1618.41	1254.67	8032.87	4722.41	6457.74		1146.68	1251.58	1145.5	1407.82	1618.41	1433.37	8055.95	6125.82	6457.74		1181.25	1486.53	6879.84		1181.25	1615.28	7888.03		DAK2	1.36743	0.0152804	0.000495446	6.67768	0.000672084	0.000492862
DDR48		10279.6	11521.3	8854.5	6360.7	7287.41	4985.67	12610.9	10685.4	11623.7		11360.7	11865.4	8854.5	7390.2	7287.41	5695.77	12647.1	13860.9	11623.7		10693.5	6791.13	12710.6		10693.5	7379.3	14573.2		DDR48	0.690071	0.0225262	0.020439	1.36281	0.149775	0.0458805
DFG5		521.562	584.277	425.498	319.699	470.408	340.675	457.867	291.413	446.742		576.415	601.731	425.498	371.443	470.408	389.196	459.182	378.015	446.742		534.548	410.349	427.98		534.548	445.889	490.697		DFG5	0.834143	0.119478	0.0229925	0.917967	0.153093	0.0466018
ECE1		58600.6	62013.3	60486.5	305.699	218.408	151.675	1083.87	458.413	542.742		64763.6	63865.8	60486.5	355.177	218.408	173.277	1086.98	594.644	542.742		63038.6	248.954	741.456		63038.6	270.516	850.111		ECE1	0.00429127	1.11039e-06	9.32501e-05	0.0134856	1.18265e-06	1.09121e-05
ECM331		1054.56	1166.28	822.498	88.6989	89.408	43.6748	1118.87	624.413	949.742		1165.47	1201.12	822.498	103.055	89.408	49.8952	1122.08	809.976	949.742		1063.03	80.7861	960.6		1063.03	87.7829	1101.37		ECM331	0.0825782	0.00128223	0.00414756	1.03607	0.534056	0.141248
EFG1		1646.56	1753.28	2407.5	1226.7	2252.41	1362.67	2634.87	2719.41	2227.74		1819.73	1805.65	2407.5	1425.24	2252.41	1556.76	2642.44	3527.57	2227.74		2010.96	1744.8	2799.25		2010.96	1895.92	3209.46		EFG1	0.942793	0.457931	0.0458007	1.59598	0.141807	0.0439964
ELF1		1057.56	1059.28	1230.5	353.699	411.408	507.675	704.867	466.413	487.742		1168.79	1090.92	1230.5	410.946	411.408	579.981	706.892	605.022	487.742		1163.4	467.445	599.885		1163.4	507.93	687.794		ELF1	0.436591	0.000551562	0.247399	0.591193	0.0016876	0.000954901
ENA2		2798.56	2755.28	3196.5	3195.7	2840.41	2730.67	203.867	267.413	249.742		3092.89	2837.58	3196.5	3712.93	2840.41	3119.6	204.452	346.883	249.742		3042.32	3224.31	267.026		3042.32	3503.57	306.157		ENA2	1.15161	0.549103	0.228261	0.100633	1.72639e-05	3.48155e-05
ENA21		6191.56	6624.28	6962.5	5238.7	6144.41	6325.67	1525.87	1131.41	1198.74		6842.73	6822.16	6962.5	6086.6	6144.41	7226.62	1530.25	1467.65	1198.74		6875.8	6485.88	1398.88		6875.8	7047.61	1603.88		ENA21	1.02499	0.355236	0.0193691	0.233264	9.98732e-07	1.09121e-05
FAV2		176.562	193.277	182.498	120.699	126.408	73.6748	64.8667	76.413	70.7421		195.131	199.051	182.498	140.234	126.408	84.168	65.0531	99.1214	70.7421		192.226	116.937	78.3055		192.226	127.065	89.7807		FAV2	0.661015	0.012839	0.000370278	0.467057	0.00061497	0.000457916
FBP1		6480.56	7211.28	9464.5	8294.7	7233.41	8072.67	3951.87	4336.41	4359.74		7162.12	7426.69	9464.5	9637.22	7233.41	9222.44	3963.22	5625.11	4359.74		8017.77	8697.69	4649.36		8017.77	9450.99	5330.69		FBP1	1.17876	0.548561	0.0434663	0.664859	0.018884	0.00725385
FDH1		3535.56	3828.28	3677.5	8942.7	16076.4	7138.67	392.867	509.413	546.742		3907.4	3942.64	3677.5	10390.1	16076.4	8155.42	393.995	660.8	546.742		3842.51	11540.6	533.846		3842.51	12540.2	612.077		FDH1	3.26354	0.0309967	0.0638193	0.159291	8.24654e-06	2.60275e-05
FGR15		177.562	225.277	209.498	187.699	178.408	112.675	269.867	237.413	222.742		196.236	232.007	209.498	218.079	178.408	128.723	270.642	307.967	222.742		212.58	175.07	267.117		212.58	190.232	306.261		FGR15	0.894874	0.249662	0.00581655	1.44069	0.111427	0.0359539
FKH2		149.562	165.277	174.498	104.699	126.408	119.675	303.867	233.413	257.742		165.292	170.214	174.498	121.645	126.408	136.72	304.74	302.779	257.742		170.001	128.257	288.42		170.001	139.366	330.686		FKH2	0.819793	0.00129075	0.0166531	1.9452	0.00160701	0.00093456
FRP1		3956.56	4152.28	5663.5	3909.7	3926.41	3256.67	1286.87	1464.41	1371.74		4372.67	4276.31	5663.5	4542.5	3926.41	3720.51	1290.56	1899.61	1371.74		4770.83	4063.14	1520.64		4770.83	4415.04	1743.48		FRP1	0.925425	0.238199	0.0229152	0.365445	0.00260488	0.00123604
FRP2		7071.56	7331.28	7562.5	7280.7	7654.41	7424.67	1003.87	999.413	1332.74		7815.28	7550.28	7562.5	8459.1	7654.41	8482.15	1006.75	1296.42	1332.74		7642.68	8198.55	1211.97		7642.68	8908.62	1389.58		FRP2	1.16564	0.12341	0.000370278	0.181818	1.14584e-06	1.09121e-05
FRP3		6535.56	7452.28	8470.5	13324.7	18801.4	16633.7	1257.87	1300.41	1379.74		7222.91	7674.89	8470.5	15481.3	18801.4	19002.8	1261.48	1686.87	1379.74		7789.43	17761.8	1442.7		7789.43	19300.2	1654.12		FRP3	2.47774	0.00113991	0.414863	0.212354	8.01709e-05	9.46408e-05
FTR1		5267.56	5503.28	7165.5	5512.7	8104.41	8839.67	17127.9	11835.4	15480.7		5821.55	5667.67	7165.5	6404.95	8104.41	10098.7	17177.1	15352.7	15480.7		6218.24	8202.68	16003.5		6218.24	8913.11	18348.7		FTR1	1.43338	0.164722	0.0383804	2.95079	0.000205843	0.000207558
GAL1		1927.56	2074.28	1791.5	2334.7	2080.41	2798.67	2260.87	1926.41	3036.74		2130.28	2136.24	1791.5	2712.58	2080.41	3197.28	2267.36	2498.9	3036.74		2019.34	2663.42	2601		2019.34	2894.1	2982.16		GAL1	1.43319	0.133482	0.000689757	1.4768	0.0845115	0.0280162
GAL4		1035.56	1124.28	1141.5	1608.7	1609.41	1435.67	2305.87	1884.41	2337.74		1144.47	1157.86	1141.5	1869.07	1609.41	1640.15	2312.49	2444.42	2337.74		1147.94	1706.21	2364.89		1147.94	1853.98	2711.44		GAL4	1.61505	0.00243976	0.234617	2.362	7.4827e-06	2.60275e-05
GAP2		1760.56	2072.28	1936.5	9724.7	12417.4	8416.67	98.8667	203.413	135.742		1945.72	2134.18	1936.5	11298.7	12417.4	9615.44	99.1508	263.863	135.742		2005.47	11110.5	166.252		2005.47	12072.8	190.615		GAP2	6.01994	0.000368684	0.0122945	0.0950478	2.28361e-05	4.08005e-05
GCA2		443.562	461.277	299.498	324.699	336.408	291.675	1021.87	1163.41	1301.74		490.212	475.056	299.498	377.252	336.408	333.217	1024.8	1509.16	1301.74		421.589	348.959	1278.57		421.589	379.182	1465.93		GCA2	0.899413	0.311988	0.145191	3.47716	0.00499642	0.00217862
GCN4		1726.56	1743.28	1281.5	1572.7	2100.41	1431.67	2142.87	1189.41	2291.74		1908.14	1795.35	1281.5	1827.25	2100.41	1635.58	2149.02	1542.88	2291.74		1661.66	1854.41	1994.55		1661.66	2015.02	2286.84		GCN4	1.21265	0.458754	0.00385499	1.37623	0.329118	0.0923112
GIS2		2792.56	2882.28	3020.5	2094.7	2672.41	2427.67	5144.87	3460.41	4719.74		3086.26	2968.38	3020.5	2433.73	2672.41	2773.44	5159.65	4488.78	4719.74		3025.04	2626.53	4789.39		3025.04	2854.01	5491.24		GIS2	0.94346	0.0199835	0.000870182	1.81526	0.000906028	0.000626454
GNP1		6656.56	7244.28	9139.5	3296.7	6415.41	4358.67	3095.87	3036.41	3082.74		7356.63	7460.68	9139.5	3830.28	6415.41	4979.47	3104.76	3938.77	3082.74		7985.6	5075.05	3375.43		7985.6	5514.6	3870.07		GNP1	0.690568	0.0369295	0.00909399	0.484631	0.00200084	0.00106418
GPD2		7142.56	7414.28	9552.5	3395.7	3642.41	3005.67	1205.87	759.413	869.742		7893.75	7635.76	9552.5	3945.3	3642.41	3433.76	1209.33	985.095	869.742		8360.67	3673.83	1021.39		8360.67	3992.01	1171.07		GPD2	0.477475	0.0016276	0.0593015	0.140069	0.000271449	0.000252656
HAC1		1576.56	1683.28	1706.5	1171.7	970.408	901.675	1371.87	1064.41	1310.74		1742.37	1733.56	1706.5	1361.34	970.408	1030.1	1375.81	1380.74	1310.74		1727.48	1120.62	1355.76		1727.48	1217.67	1554.44		HAC1	0.704885	0.00764348	0.037379	0.899833	0.000119227	0.0001342
HAP2		1074.56	1095.28	1277.5	501.699	641.408	520.675	387.867	300.413	402.742		1187.57	1128	1277.5	582.901	641.408	594.833	388.981	389.69	402.742		1197.69	606.381	393.804		1197.69	658.899	451.514		HAP2	0.550142	0.000229269	0.0458007	0.376987	5.12988e-05	6.71044e-05
HAP3		185.562	138.277	231.498	453.699	309.408	291.675	205.867	126.413	136.742		205.078	142.408	231.498	527.132	309.408	333.217	206.458	163.98	136.742		192.994	389.919	169.06		192.994	423.689	193.835		HAP3	2.19535	0.0559808	0.00385499	1.00436	0.512139	0.136195
HAP43		1193.56	1317.28	1444.5	1566.7	1207.41	1048.67	1049.87	923.413	1039.74		1319.09	1356.63	1444.5	1820.27	1207.41	1198.03	1052.88	1197.83	1039.74		1373.4	1408.57	1096.82		1373.4	1530.57	1257.55		HAP43	1.11443	0.874655	0.00335172	0.915645	0.0116653	0.00462788
HEM1		391.562	385.277	377.498	129.699	207.408	191.675	824.867	453.413	566.742		432.743	396.786	377.498	150.691	207.408	218.974	827.237	588.158	566.742		402.342	192.358	660.712		402.342	209.018	757.535		HEM1	0.519503	0.00139142	0.0540334	1.88281	0.0384776	0.0134951
HGT7		4365.56	4558.28	3357.5	6152.7	5943.41	6348.67	82733.9	40118.4	81732.7		4824.69	4694.44	3357.5	7148.53	5943.41	7252.9	82971.6	52040.8	81732.7		4292.21	6781.61	72248.4		4292.21	7368.96	82835.9		HGT7	1.71682	0.016762	0.00060918	19.2991	0.00256145	0.00122747
HOG1		1086.56	1278.28	1244.5	1240.7	1339.41	1161.67	1647.87	1333.41	1677.74		1200.84	1316.46	1244.5	1441.51	1339.41	1327.13	1652.6	1729.68	1677.74		1253.93	1369.35	1686.67		1253.93	1487.95	1933.84		HOG1	1.18663	0.0801269	0.00657169	1.54222	0.000440366	0.000355229
HSP104		1900.56	2106.28	2849.5	1425.7	2096.41	1909.67	3304.87	4257.41	3877.74		2100.44	2169.2	2849.5	1656.45	2096.41	2181.66	3314.36	5522.63	3877.74		2373.05	1978.18	4238.25		2373.05	2149.5	4859.33		HSP104	0.905799	0.243854	0.382188	2.04772	0.057078	0.0194547
HSP70		6626.56	7344.28	10138.5	7197.7	6384.41	6864.67	9942.87	14862.4	11606.7		7323.48	7563.67	10138.5	8362.67	6384.41	7842.39	9971.43	19279.2	11606.7		8341.88	7529.82	13619.1		8341.88	8181.98	15614.9		HSP70	0.980831	0.493221	0.0294227	1.87187	0.154146	0.0466291
HTA1		8586.56	9399.28	7443.5	2932.7	3212.41	1907.67	14241.9	9015.41	13355.7		9489.61	9680.05	7443.5	3407.37	3212.41	2179.38	14282.8	11694.6	13355.7		8871.05	2933.05	13111		8871.05	3187.08	15032.4		HTA1	0.359267	0.00185118	0.0296418	1.69454	0.0152326	0.00589805
HTA2		4982.56	5487.28	4353.5	1654.7	1475.41	843.675	8217.87	4840.41	7868.74		5506.58	5651.19	4353.5	1922.52	1475.41	963.837	8241.48	6278.89	7868.74		5170.42	1453.92	7463.04		5170.42	1579.84	8556.69		HTA2	0.305554	0.00168743	0.0118147	1.65493	0.0346129	0.0124094
HWP1		37835.6	38984.3	31967.5	407.699	395.408	208.675	3263.87	1887.41	3661.74		41814.7	40148.8	31967.5	473.686	395.408	238.396	3273.24	2448.31	3661.74		37977	369.163	3127.77		37977	401.136	3586.12		HWP1	0.0105626	0.000246583	0.000820743	0.0944287	0.000340764	0.000299872
HYR1		1312.56	1430.28	1637.5	22.6989	4.40797	7.67476	1	1	1		1450.6	1473	1637.5	26.3728	4.40797	8.76785	1	1	1		1520.37	13.1829	1		1520.37	14.3246	1		HYR1	0.00942181	1.42327e-05	0.000318087	0.000657735	1.34346e-05	2.95561e-05
IFD6		238.562	270.277	188.498	102.699	79.408	80.6748	316.867	247.413	270.742		263.652	278.351	188.498	119.321	79.408	92.165	317.777	320.939	270.742		243.5	96.9647	303.153		243.5	105.363	347.578		IFD6	0.432701	0.00833915	0.0565129	1.42742	0.137712	0.0430016
IHD1		9368.56	10248.3	11705.5	5057.7	5112.41	5696.67	12352.9	10327.4	12353.7		10353.9	10554.4	11705.5	5876.3	5112.41	6508.04	12388.4	13396.5	12353.7		10871.3	5832.25	12712.9		10871.3	6337.38	14575.9		IHD1	0.582948	0.000986891	0.000437563	1.34077	0.0274081	0.0101263
INO4		296.562	299.277	292.498	574.699	554.408	397.675	153.867	150.413	155.742		327.752	308.217	292.498	667.716	554.408	454.314	154.309	195.113	155.742		309.489	558.813	168.388		309.489	607.211	193.064		INO4	1.96198	0.0162593	0.00434493	0.623816	0.0011032	0.000711934
IRE1		244.562	286.277	192.498	228.699	421.408	245.675	647.867	415.413	661.742		270.283	294.829	192.498	265.715	421.408	280.666	649.728	538.866	661.742		252.536	322.596	616.779		252.536	350.536	707.163		IRE1	1.38806	0.296497	0.0188919	2.80024	0.00186019	0.00100037
IRO1		746.562	802.277	994.498	1260.7	1024.41	726.675	2799.87	2902.41	2802.74		825.078	826.243	994.498	1464.75	1024.41	830.173	2807.91	3764.95	2802.74		881.94	1106.44	3125.2		881.94	1202.27	3583.18		IRO1	1.36321	0.315856	0.0290391	4.06284	0.002305	0.00113839
KIP4		998.562	973.277	1143.5	183.699	151.408	105.675	1020.87	838.413	1035.74		1103.58	1002.35	1143.5	213.431	151.408	120.726	1023.8	1087.57	1035.74		1083.14	161.855	1049.04		1083.14	175.873	1202.77		KIP4	0.162373	5.13749e-05	0.000328545	1.11044	0.502606	0.135145
KRE1		1103.56	1153.28	1033.5	444.699	453.408	318.675	746.867	497.413	685.742		1219.62	1187.73	1033.5	516.675	453.408	364.063	749.013	645.234	685.742		1146.95	444.715	693.33		1146.95	483.232	794.932		KRE1	0.421319	0.000637247	0.00498767	0.693084	0.00220693	0.0011127
MAC1		120.562	123.277	108.498	119.699	93.408	73.6748	63.8667	80.413	50.7421		133.242	126.96	108.498	139.073	93.408	84.168	64.0502	104.31	50.7421		122.9	105.55	73.0342		122.9	114.691	83.7368		MAC1	0.933209	0.402019	0.274392	0.681343	0.0482158	0.0166689
MAE1		612.562	678.277	794.498	883.699	728.408	874.675	3252.87	2728.41	3319.74		676.985	698.539	794.498	1026.73	728.408	999.252	3262.21	3539.24	3319.74		723.341	918.13	3373.73		723.341	997.648	3868.13		MAE1	1.37922	0.128273	0.00385499	5.34759	8.5699e-06	2.60275e-05
MBF1		3789.56	4302.28	4435.5	5465.7	4630.41	4111.67	11323.9	9191.41	10742.7		4188.11	4430.8	4435.5	6350.34	4630.41	4697.29	11356.4	11922.9	10742.7		4351.47	5226.01	11340.7		4351.47	5678.63	13002.6		MBF1	1.30499	0.198726	0.000328545	2.98809	3.72916e-05	5.51857e-05
MDM34		2819.56	3280.28	3006.5	3361.7	3018.41	3232.67	439.867	566.413	672.742		3116.1	3378.27	3006.5	3905.8	3018.41	3693.1	441.13	734.74	672.742		3166.95	3539.1	616.204		3166.95	3845.62	706.505		MDM34	1.2143	0.267769	0.35491	0.223087	5.63639e-05	6.9949e-05
MET28		1122.56	1142.28	1064.5	1784.7	1852.41	1677.67	2299.87	1518.41	2359.74		1240.62	1176.4	1064.5	2073.56	1852.41	1916.62	2306.47	1969.66	2359.74		1160.51	1947.53	2211.96		1160.51	2116.2	2536.1		MET28	1.82352	0.000704497	0.00630915	2.18534	0.00136616	0.000826529
NDT80		1060.56	1138.28	1262.5	592.699	597.408	471.675	543.867	364.413	374.742		1172.1	1172.28	1262.5	688.629	597.408	538.854	545.429	472.709	374.742		1202.29	608.297	464.294		1202.29	660.981	532.333		NDT80	0.549767	0.000359967	0.211247	0.442764	0.000218196	0.000215524
NPR1		285.562	327.277	299.498	392.699	461.408	249.675	500.867	350.413	447.742		315.595	337.054	299.498	456.259	461.408	285.235	502.306	454.549	447.742		317.382	400.967	468.199		317.382	435.695	536.81		NPR1	1.37278	0.228862	0.00272808	1.69137	0.00175979	0.000976999
NRG1		1273.56	1326.28	1184.5	2169.7	2973.41	2930.67	1	1	1		1407.5	1365.9	1184.5	2520.87	2973.41	3348.08	1	1	1		1319.3	2947.45	1		1319.3	3202.73	1		NRG1	2.4276	0.00281654	0.00391088	0.000757978	4.28683e-05	5.92807e-05
PCK1		21033.6	23655.3	24151.5	12745.7	19811.4	19948.7	8717.87	8020.41	10140.7		23245.7	24361.9	24151.5	14808.6	19811.4	22789.9	8742.91	10403.9	10140.7		23919.7	19136.6	9762.53		23919.7	20794.1	11193.2		PCK1	0.869328	0.11193	0.175426	0.467947	2.16273e-05	4.08005e-05
PES1		125.562	131.277	176.498	45.6989	47.408	43.6748	63.8667	61.413	41.7421		138.768	135.199	176.498	53.0954	47.408	49.8952	64.0502	79.6637	41.7421		150.155	50.1329	61.8187		150.155	54.4748	70.8778		PES1	0.362792	0.00168019	0.00460506	0.472032	0.00680251	0.00283709
PFK2		1211.56	1310.28	1171.5	1919.7	2747.41	2325.67	11200.9	6424.41	9404.74		1338.98	1349.42	1171.5	2230.41	2747.41	2656.91	11233	8333.62	9404.74		1286.63	2544.91	9657.14		1286.63	2765.32	11072.3		PFK2	2.14927	0.001758	0.020439	8.60566	0.000592107	0.000447781
PGA13		333.562	347.277	343.498	169.699	288.408	212.675	2645.87	2365.41	2979.74		368.643	357.651	343.498	197.165	288.408	242.965	2653.47	3068.37	2979.74		356.597	242.846	2900.53		356.597	263.879	3325.58		PGA13	0.739992	0.0141149	0.00037008	9.32587	3.59302e-05	5.51857e-05
PGA17		297.562	293.277	343.498	6.69887	21.408	10.6748	1	1	1		328.857	302.038	343.498	7.78311	21.408	12.1951	1	1	1		324.797	13.7954	1		324.797	14.9902	1		PGA17	0.0461525	1.69475e-05	0.0242777	0.00307884	1.17427e-05	2.95561e-05
PGA25		181.562	175.277	200.498	1	1	1	1	1	1		200.657	180.513	200.498	1	1	1	1	1	1		193.889	1	1		193.889	1	1		PGA25	0.00560428	8.60414e-06	0.0369056	0.00515758	8.60414e-06	2.60275e-05
PGA34		949.562	968.277	944.498	44.6989	54.408	64.6748	1	1	1		1049.43	997.202	944.498	51.9335	54.408	73.8862	1	1	1		997.042	60.0759	1		997.042	65.279	1		PGA34	0.0654727	7.20749e-06	0.000328545	0.00100297	5.10049e-06	2.60275e-05
PGA37		310.562	328.277	394.498	56.6989	73.408	21.6748	1	1	1		343.224	338.083	394.498	65.8758	73.408	24.7618	1	1	1		358.602	54.6819	1		358.602	59.4178	1		PGA37	0.165693	0.000206639	0.000638114	0.00278861	3.79508e-05	5.51857e-05
PGA48		1869.56	1877.28	1563.5	940.699	1104.41	1040.67	816.867	513.413	780.742		2066.18	1933.36	1563.5	1092.95	1104.41	1188.9	819.214	665.989	780.742		1854.35	1128.75	755.315		1854.35	1226.51	866.001		PGA48	0.661426	0.00910502	0.214525	0.467012	0.00220651	0.0011127
PGA53		1436.56	1489.28	1831.5	1088.7	1577.41	1314.67	2748.87	2245.41	2068.74		1587.65	1533.77	1831.5	1264.91	1577.41	1501.92	2756.76	2912.71	2068.74		1650.97	1448.08	2579.4		1650.97	1573.5	2957.4		PGA53	0.953074	0.197309	0.0703105	1.79131	0.0278765	0.0102214
PGA7		6483.56	6927.28	8266.5	6486.7	7497.41	7084.67	2242.87	2313.41	2433.74		7165.44	7134.21	8266.5	7536.59	7497.41	8093.72	2249.31	3000.91	2433.74		7522.05	7709.24	2561.32		7522.05	8376.93	2936.67		PGA7	1.11365	0.6783	0.00200761	0.390408	0.000339198	0.000299872
PHO89		4094.56	4448.28	2810.5	1372.7	1940.41	1974.67	688.867	410.413	540.742		4525.19	4581.16	2810.5	1594.87	1940.41	2255.92	690.846	532.38	540.742		3972.28	1930.4	587.989		3972.28	2097.59	674.155		PHO89	0.528057	0.0288836	0.33785	0.169715	0.00439175	0.00196815
PHR1		4722.56	4863.28	7594.5	2088.7	3188.41	2268.67	4214.87	4103.41	3997.74		5219.23	5008.55	7594.5	2426.76	3188.41	2591.8	4226.98	5322.87	3997.74		5940.76	2735.66	4515.86		5940.76	2972.59	5177.63		PHR1	0.500372	0.0204115	0.219717	0.871543	0.198085	0.0574092
PHR2		278.562	264.277	238.498	54.6989	57.408	20.6748	93.8667	23.413	42.7421		307.859	272.172	238.498	63.5521	57.408	23.6194	94.1364	30.3709	42.7421		272.843	48.1932	55.7498		272.843	52.3671	63.9196		PHR2	0.191932	0.000675675	0.193331	0.234273	0.00148449	0.000876214
PIL1		12218.6	13150.3	13320.5	13780.7	16832.4	13506.7	12269.9	9655.41	12175.7		13503.6	13543.1	13320.5	16011.2	16832.4	15430.4	12305.1	12524.8	12175.7		13455.7	16091.3	12335.2		13455.7	17485	14142.9		PIL1	1.29944	0.00307851	0.00951921	1.05107	0.000800663	0.000578389
PIR1		2567.56	2465.28	2986.5	4075.7	4298.41	4048.67	1408.87	1335.41	1561.74		2837.59	2538.92	2986.5	4735.36	4298.41	4625.32	1412.91	1732.27	1561.74		2787.67	4553.03	1568.98		2787.67	4947.36	1798.9		PIR1	1.77473	0.000685321	0.000177331	0.645305	0.00162196	0.00093456
PLB5		467.562	517.277	529.498	235.699	207.408	207.675	449.867	370.413	386.742		516.736	532.729	529.498	273.848	207.408	237.253	451.159	480.492	386.742		526.321	239.503	439.465		526.321	260.246	503.865		PLB5	0.494463	0.00013265	0.366562	0.957334	0.0365987	0.0129297
POL1		154.562	184.277	184.498	62.6989	79.408	42.6748	578.867	375.413	491.742		170.818	189.782	184.498	72.8469	79.408	48.7528	580.53	486.978	491.742		181.699	67.0026	519.75		181.699	72.8056	595.916		POL1	0.400694	0.000461032	0.405452	3.27969	0.000398568	0.000332598
PRA1		57.5622	48.277	43.4975	149.699	220.408	219.675	1	4.41299	17.7421		63.6161	49.7192	43.4975	173.928	220.408	250.962	1	5.72445	17.7421		52.2776	215.1	8.15552		52.2776	233.729	9.35065		PRA1	4.47092	0.00216105	0.00838959	0.178865	0.00472198	0.00209673
RBR1		36.5622	49.277	53.4975	1	1	1	1	1	1		40.4075	50.749	53.4975	1	1	1	1	1	1		48.218	1	1		48.218	1	1		RBR1	0.0225353	0.000290475	0.000870182	0.0207391	0.000290475	0.000265264
RBR2		677.562	737.277	712.498	159.699	175.408	160.675	47.8667	67.413	47.7421		748.821	759.301	712.498	185.547	175.408	183.559	48.0043	87.4468	47.7421		740.207	181.505	61.0644		740.207	197.225	70.013		RBR2	0.266445	2.72209e-06	0.22192	0.0945857	3.94717e-06	2.60275e-05
RBT1		348.562	395.277	358.498	175.699	163.408	108.675	599.867	465.413	906.742		385.221	407.085	358.498	204.136	163.408	124.153	601.59	603.725	906.742		383.601	163.899	704.019		383.601	178.094	807.188		RBT1	0.46427	0.00124602	0.0464355	2.10424	0.0351464	0.012508
RBT5		56791.6	59683.3	63232.5	51073.7	82459.4	64501.7	37503.9	28109.4	34648.7		62764.3	61466.2	63232.5	59340.2	82459.4	73688.5	37611.6	36463	34648.7		62487.7	71829.3	36241.1		62487.7	78050.4	41552		RBT5	1.24905	0.239107	0.000328545	0.664963	1.31015e-05	2.95561e-05
RCT1		8896.56	9828.28	13581.5	8164.7	10723.4	7235.67	6954.87	7920.41	6983.74		9832.21	10121.9	13581.5	9486.18	10723.4	8266.23	6974.85	10274.2	6983.74		11178.5	9491.94	8077.6		11178.5	10314	9261.31		RCT1	0.922665	0.29405	0.0496699	0.828491	0.129874	0.0410842
RFG1		857.562	863.277	639.498	1038.7	1043.41	904.675	2469.87	1568.41	2409.74		947.752	889.065	639.498	1206.82	1043.41	1033.53	2476.96	2034.51	2409.74		825.438	1094.58	2307.07		825.438	1189.38	2645.16		RFG1	1.44091	0.070596	0.0294227	3.20455	0.000890925	0.000626454
RFX2		305.562	309.277	393.498	132.699	79.408	67.6748	400.867	408.413	393.742		337.698	318.516	393.498	154.177	79.408	77.3135	402.018	529.785	393.742		349.904	103.633	441.849		349.904	112.608	506.598		RFX2	0.321826	0.00189319	0.00152552	1.44782	0.136467	0.0428895
RHR2		11146.6	11343.3	12908.5	1954.7	2923.41	1781.67	5145.87	2393.41	3221.74		12318.8	11682.1	12908.5	2271.07	2923.41	2035.43	5160.65	3104.69	3221.74		12303.2	2409.97	3829.03		12303.2	2618.7	4390.14		RHR2	0.212848	2.37254e-05	0.0113189	0.356831	0.000358629	0.000309958
RIM101		3049.56	3355.28	4197.5	2043.7	2557.41	1943.67	789.867	983.413	818.742		3370.28	3455.51	4197.5	2374.48	2557.41	2220.51	792.136	1275.66	818.742		3674.43	2384.13	962.181		3674.43	2590.62	1103.18		RIM101	0.70504	0.00998828	0.116885	0.300232	0.00089475	0.000626454
RNR22		291.562	339.277	379.498	286.699	206.408	203.675	5051.87	3043.41	3554.74		322.226	349.412	379.498	333.102	206.408	232.684	5066.38	3947.86	3554.74		350.378	257.398	4189.66		350.378	279.691	4803.63		RNR22	0.798254	0.0912297	0.15077	13.7098	0.00106339	0.000695512
ROB1		1474.56	1666.28	1506.5	1	1	1	1	1	1		1629.64	1716.05	1506.5	1	1	1	1	1	1		1617.4	1	1		1617.4	1	1		ROB1	0.000671826	1.19002e-05	0.000495446	0.000618277	1.19002e-05	2.95561e-05
RPN4		815.562	827.277	916.498	619.699	788.408	729.675	916.867	630.413	789.742		901.335	851.99	916.498	719.999	788.408	833.6	919.501	817.759	789.742		889.941	780.669	842.334		889.941	848.282	965.772		RPN4	0.95319	0.0463781	0.00574704	1.08521	0.33984	0.0939899
RTA3		10.5622	3.27702	1	6.69887	9.40797	7.67476	1	1	1		11.6731	3.37491	1	7.78311	9.40797	8.76785	1	1	1		5.34933	8.65298	1		5.34933	9.40241	1		RTA3	1.75768	0.369463	0.00209999	0.186939	0.250024	0.0716044
SAP1		20.5622	32.277	1	24.6989	19.408	15.6748	25.8667	11.413	10.7421		22.7248	33.2412	1	28.6965	19.408	17.9073	25.9411	14.8047	10.7421		18.9887	22.0039	17.1626		18.9887	23.9096	19.6777		SAP1	1.25915	0.779626	0.0568756	1.03629	0.870676	0.225351
SAP10		64.5622	92.277	81.4975	91.6989	91.408	68.6748	32.8667	31.413	17.7421		71.3522	95.0335	81.4975	106.541	91.408	78.4559	32.9612	40.7483	17.7421		82.6278	92.1348	30.4839		82.6278	100.115	34.9511		SAP10	1.21163	0.421524	0.00348609	0.422994	0.00563203	0.00243384
SAP2		13.5622	7.27702	1	1	1	1	1	1	1		14.9886	7.4944	1	1	1	1	1	1	1		7.82766	1	1		7.82766	1	1		SAP2	0.138817	0.16642	0.0925032	0.127752	0.16642	0.0497205
SAP4		101.562	81.277	58.4975	1	1	1	1	1	1		112.244	83.7049	58.4975	1	1	1	1	1	1		84.8153	1	1		84.8153	1	1		SAP4	0.0128115	0.00569709	0.0130707	0.0117903	0.00569709	0.00244017
SAP5		2194.56	2425.28	3218.5	51.6989	29.408	11.6748	1	1	1		2425.36	2497.73	3218.5	60.0665	29.408	13.3376	1	1	1		2713.86	34.2707	1		2713.86	37.2388	1		SAP5	0.0137217	0.000453579	0.00123425	0.000368479	0.00042989	0.000352656
SAP6		549.562	532.277	653.498	1	1	1	1	1	1		607.36	548.177	653.498	1	1	1	1	1	1		603.012	1	1		603.012	1	1		SAP6	0.00180197	3.87668e-05	0.000328545	0.00165834	3.87668e-05	5.51857e-05
SAP9		2881.56	3209.28	3181.5	1287.7	2094.41	1589.67	837.867	727.413	907.742		3184.62	3305.15	3181.5	1496.12	2094.41	1816.09	840.274	943.586	907.742		3223.75	1802.2	897.201		3223.75	1958.29	1028.68		SAP9	0.607457	0.00132067	0.0546192	0.319094	1.35274e-06	1.09121e-05
SCW11		820.562	965.277	659.498	1526.7	1276.41	1304.67	186.867	109.413	160.742		906.861	994.112	659.498	1773.8	1276.41	1490.5	187.404	141.928	160.742		853.49	1513.57	163.358		853.49	1644.66	187.297		SCW11	1.92698	0.0197473	0.00200761	0.219448	0.00240634	0.00116765
SCW4		294.562	311.277	383.498	21.6989	1	2.67476	1	1	1		325.541	320.576	383.498	25.2109	1	3.05572	1	1	1		343.205	9.75554	1		343.205	10.6005	1		SCW4	0.0308867	0.00010338	0.0375257	0.00291371	7.11477e-05	8.60887e-05
SEF1		1588.56	1649.28	1443.5	634.699	523.408	608.675	836.867	535.413	776.742		1755.63	1698.54	1443.5	737.427	523.408	695.367	839.271	694.527	776.742		1632.56	652.067	770.18		1632.56	708.542	883.045		SEF1	0.434007	0.00107902	0.405452	0.540896	0.0011852	0.000745478
SEF2		415.562	443.277	496.498	516.699	464.408	221.675	749.867	570.413	569.742		459.267	456.519	496.498	600.328	464.408	253.247	752.021	739.928	569.742		470.761	439.328	687.231		470.761	477.378	787.939		SEF2	1.01406	0.772897	0.0818489	1.67376	0.0228957	0.00859031
SGA1		482.562	475.277	444.498	379.699	400.408	336.675	196.867	120.413	203.742		533.313	489.475	444.498	441.154	400.408	384.626	197.432	156.197	203.742		489.095	408.73	185.791		489.095	444.129	213.017		SGA1	0.908063	0.058808	0.15077	0.435533	0.000515303	0.000395884
SIN3		869.562	912.277	1102.5	1203.7	1153.41	1154.67	1587.87	1490.41	1549.74		961.014	939.529	1102.5	1398.52	1153.41	1319.13	1592.43	1933.33	1549.74		1001.01	1290.35	1691.84		1001.01	1402.11	1939.76		SIN3	1.40069	0.0307752	0.00381402	1.9378	0.0063173	0.00265876
SIT1		2274.56	2329.28	2162.5	1892.7	1981.41	2011.67	260.867	126.413	164.742		2513.78	2398.86	2162.5	2199.04	1981.41	2298.19	261.616	163.98	164.742		2358.38	2159.55	196.78		2358.38	2346.58	225.616		SIT1	0.994999	0.227052	0.0120764	0.0956659	3.72758e-05	5.51857e-05
SMC2		134.562	115.277	162.498	141.699	122.408	65.6748	233.867	204.413	171.742		148.714	118.721	162.498	164.633	122.408	75.0286	234.539	265.16	171.742		143.311	120.69	223.814		143.311	131.143	256.612		SMC2	0.915094	0.477929	0.0237383	1.7906	0.0569949	0.0194547
SOD4		348.562	382.277	236.498	428.699	621.408	1051.67	350.867	205.413	383.742		385.221	393.696	236.498	498.085	621.408	1201.46	351.875	266.458	383.742		338.472	773.652	334.025		338.472	840.657	382.974		SOD4	2.48369	0.12247	0.0599464	1.13148	0.946181	0.243591
SOD5		25247.6	26888.3	34605.5	16552.7	19528.4	14266.7	14562.9	16762.4	19942.7		27902.8	27691.5	34605.5	19231.8	19528.4	16298.6	14604.7	21743.9	19942.7		30066.6	18353	18763.8		30066.6	19942.5	21513.5		SOD5	0.663277	0.00932167	0.00437757	0.715527	0.022357	0.00845373
SOD6		553.562	630.277	831.498	237.699	264.408	209.675	242.867	315.413	323.742		611.78	649.105	831.498	276.171	264.408	239.538	243.565	409.147	323.742		697.461	260.039	325.485		697.461	282.561	373.182		SOD6	0.405128	0.0031253	0.0118147	0.535058	0.0109873	0.00439492
SOG2		234.562	243.277	262.498	207.699	231.408	172.675	172.867	178.413	183.742		259.231	250.544	262.498	241.316	231.408	197.268	173.363	231.434	183.742		257.424	223.331	196.18		257.424	242.673	224.929		SOG2	0.942697	0.0690372	0.00418357	0.873766	0.0283271	0.0103085
SSB1		4952.56	5277.28	6185.5	3117.7	3723.41	3348.67	18407.9	14332.4	16644.7		5473.42	5434.92	6185.5	3622.31	3723.41	3825.62	18460.8	18591.7	16644.7		5697.95	3723.78	17899.1		5697.95	4046.29	20522.1		SSB1	0.710131	0.00141192	0.0155758	3.60166	5.47624e-05	6.975e-05
STF2		26412.6	28402.3	33206.5	40689.7	35137.4	31181.7	21119.9	23379.4	24485.7		29190.4	29250.7	33206.5	47275.5	35137.4	35622.8	21180.5	30327.3	24485.7		30549.2	39345.2	25331.2		30549.2	42752.9	29043.3		STF2	1.39948	0.103396	0.203817	0.950706	0.155473	0.0467385
STP2		2027.56	2065.28	2075.5	1803.7	2091.41	1832.67	1692.87	1341.41	1713.74		2240.8	2126.97	2075.5	2095.63	2091.41	2093.7	1697.73	1740.05	1713.74		2147.76	2093.58	1717.18		2147.76	2274.9	1968.82		STP2	1.0592	0.32962	0.0925032	0.916685	0.00102817	0.000681691
SUT1		266.562	310.277	218.498	364.699	233.408	378.675	294.867	215.413	343.742		294.597	319.546	218.498	423.727	233.408	432.608	295.714	279.429	343.742		277.547	363.248	306.295		277.547	394.708	351.181		SUT1	1.42213	0.298155	0.0142255	1.2653	0.469305	0.126896
TEC1		2010.56	1988.28	2016.5	1656.7	1496.41	2005.67	509.867	390.413	504.742		2222.01	2047.67	2016.5	1924.84	1496.41	2291.34	511.332	506.436	504.742		2095.39	1904.2	507.503		2095.39	2069.12	581.874		TEC1	0.987459	0.467564	0.405452	0.277692	1.5641e-05	3.29141e-05
TPK1		653.562	746.277	570.498	216.699	242.408	243.675	211.867	129.413	172.742		722.297	768.57	570.498	251.772	242.408	278.381	212.475	167.872	172.742		687.122	257.52	184.363		687.122	279.824	211.38		TPK1	0.407241	0.00211459	0.366562	0.307632	0.00121679	0.000745478
TPK2		780.562	727.277	576.498	966.699	1242.41	862.675	1555.87	997.413	1663.74		862.654	749.002	576.498	1123.16	1242.41	985.543	1560.34	1293.82	1663.74		729.385	1117.04	1505.97		729.385	1213.78	1726.66		TPK2	1.66412	0.0254131	0.0148903	2.36728	0.00491313	0.00216178
TPS2		4413.56	5005.28	5841.5	5348.7	4046.41	3828.67	7147.87	7554.41	7516.74		4877.74	5154.8	5841.5	6214.4	4046.41	4373.98	7168.4	9799.43	7516.74		5291.34	4878.26	8161.53		5291.34	5300.77	9357.54		TPS2	1.00178	0.603168	0.00348609	1.76846	0.0303251	0.0109532
TRR1		1218.56	1388.28	1838.5	1148.7	942.408	936.675	1747.87	1542.41	1527.74		1346.72	1429.75	1838.5	1334.62	942.408	1070.08	1752.89	2000.79	1527.74		1538.32	1115.7	1760.47		1538.32	1212.33	2018.46		TRR1	0.788089	0.0912302	0.0346324	1.31212	0.338131	0.0939899
TRX1		3047.56	3073.28	2559.5	3556.7	6215.41	4207.67	10288.9	5897.41	10246.7		3368.07	3165.08	2559.5	4132.36	6215.41	4806.96	10318.4	7650.01	10246.7		3030.88	5051.58	9405.06		3030.88	5489.09	10783.3		TRX1	1.81105	0.0375892	0.00114925	3.55781	0.00219351	0.0011127
TTR1		1217.56	1328.28	1275.5	1052.7	1605.41	1213.67	2524.87	2043.41	2546.74		1345.61	1367.96	1275.5	1223.08	1605.41	1386.53	2532.12	2650.67	2546.74		1329.69	1405.01	2576.51		1329.69	1526.69	2954.08		TTR1	1.14816	0.545596	0.000754948	2.22163	1.15681e-05	2.95561e-05
TUP1		633.562	744.277	756.498	898.699	1314.41	952.675	1413.87	1299.41	1389.74		700.194	766.51	756.498	1044.16	1314.41	1088.36	1417.93	1685.57	1389.74		741.067	1148.98	1497.75		741.067	1248.49	1717.23		TUP1	1.68472	0.00909078	0.000870182	2.31724	0.00142852	0.000853584
TYE7		2793.56	2964.28	2586.5	2409.7	2011.41	2832.67	3469.87	2293.41	3415.74		3087.36	3052.83	2586.5	2799.72	2011.41	3236.12	3479.84	2974.97	3415.74		2908.9	2682.42	3290.18		2908.9	2914.74	3772.34		TYE7	1.00201	0.595378	0.00460506	1.29683	0.167472	0.0497279
UCF1		34365.6	36516.3	28164.5	50572.7	50906.4	48359.7	66752.9	50051.4	76228.7		37979.8	37607.1	28164.5	58758.1	50906.4	55247.4	66944.7	64925.7	76228.7		34583.8	54970.6	69366.4		34583.8	59731.6	79531.5		UCF1	1.72716	0.00659139	0.372588	2.29968	0.00182963	0.000994992
UGA32		150.562	143.277	192.498	285.699	313.408	226.675	230.867	192.413	163.742		166.397	147.557	192.498	331.94	313.408	258.959	231.53	249.594	163.742		168.817	301.436	214.955		168.817	327.543	246.456		UGA32	1.94022	0.0064986	0.303362	1.4599	0.189245	0.0551774
UGP1		2981.56	3195.28	4168.5	3791.7	3839.41	3362.67	9521.87	9137.41	8712.74		3295.13	3290.73	4168.5	4405.4	3839.41	3841.61	9549.22	11852.9	8712.74		3584.79	4028.81	10038.3		3584.79	4377.74	11509.3		UGP1	1.2212	0.270252	0.23653	3.2106	0.00278709	0.00130966
UME6		204.562	235.277	198.498	15.6989	18.408	1	166.867	107.413	134.742		226.076	242.305	198.498	18.2398	18.408	1	167.346	139.334	134.742		222.293	12.5493	147.141		222.293	13.6361	168.703		UME6	0.0613431	0.000116636	0.000638114	0.758923	0.0100579	0.00409077
UPC2		149.562	192.277	162.498	133.699	118.408	116.675	497.867	379.413	461.742		165.292	198.021	162.498	155.338	118.408	133.292	499.297	492.167	461.742		175.27	135.68	484.402		175.27	147.431	555.388		UPC2	0.841164	0.0647565	0.0762267	3.16876	4.45072e-05	5.98375e-05
WH11		22900.6	25348.3	23746.5	12939.7	19229.4	17662.7	1314.87	1594.41	1177.74		25309	26105.5	23746.5	15034	19229.4	20178.3	1318.64	2068.24	1177.74		25053.7	18147.3	1521.54		25053.7	19719	1744.51		WH11	0.787069	0.0161026	0.297176	0.0696311	6.0172e-06	2.60275e-05
YHB1		10245.6	10446.3	10483.5	2277.7	2535.41	1935.67	2000.87	1101.41	1691.74		11323.1	10758.3	10483.5	2646.35	2535.41	2211.37	2006.62	1428.73	1691.74		10855	2464.38	1709.03		10855	2677.81	1959.48		YHB1	0.24669	7.33077e-06	0.000177331	0.180514	6.74159e-06	2.60275e-05
YWP1		170.562	163.277	167.498	8583.7	9852.41	11090.7	50129.9	33104.4	46356.7		188.5	168.154	167.498	9973	9852.41	12670.3	50273.9	42942.4	46356.7		174.717	10831.9	46524.3		174.717	11770	53342.2		YWP1	67.3662	0.00031713	0.00385499	305.305	2.58062e-05	4.30697e-05
ZAP1		37.5622	45.277	53.4975	80.6989	85.408	77.6748	50.8667	33.413	20.7421		41.5127	46.6295	53.4975	93.7603	85.408	88.7378	51.0129	43.3427	20.7421		47.2133	89.302	38.3659		47.2133	97.0364	43.9881		ZAP1	2.05528	0.000576418	0.0874097	0.931691	0.414483	0.112702
ZCF20		415.562	391.277	356.498	342.699	472.408	300.675	168.867	114.413	139.742		459.267	402.965	356.498	398.166	472.408	343.499	169.352	148.414	139.742		406.243	404.691	152.503		406.243	439.741	174.851		ZCF20	1.08246	0.975614	0.00460506	0.43041	0.00121115	0.000745478
ZCF3		1191.56	1226.28	1013.5	702.699	449.408	775.675	732.867	395.413	597.742		1316.88	1262.91	1013.5	816.433	449.408	886.152	734.972	512.922	597.742		1197.76	717.331	615.212		1197.76	779.458	705.367		ZCF3	0.650763	0.0432699	0.0403934	0.588904	0.00685826	0.00283709
ZCF31		80.5622	107.277	75.4975	51.6989	117.408	55.6748	167.867	146.413	162.742		89.035	110.482	75.4975	60.0665	117.408	63.6044	168.349	189.924	162.742		91.6714	80.3596	173.672		91.6714	87.3195	199.122		ZCF31	0.952527	0.621335	0.0703806	2.17213	0.00335018	0.00154427
ZCF34		111.562	113.277	89.4975	161.699	127.408	84.6748	289.867	233.413	258.742		123.295	116.661	89.4975	187.87	127.408	96.7347	290.7	302.779	258.742		109.818	137.338	284.073		109.818	149.232	325.702		ZCF34	1.35891	0.39192	0.00733472	2.96584	0.000478522	0.000373556
ZCF39		820.562	869.277	987.498	776.699	1027.41	809.675	894.867	785.413	824.742		906.861	895.244	987.498	902.41	1027.41	924.994	897.438	1018.82	824.742		929.868	951.604	913.667		929.868	1034.02	1047.56		ZCF39	1.11201	0.675209	0.121641	1.12657	0.81153	0.211172
ZCF7		104.562	84.277	57.4975	81.6989	61.408	48.6748	44.8667	61.413	68.7421		115.559	86.7946	57.4975	94.9221	61.408	55.6074	44.9956	79.6637	68.7421		86.6171	70.6458	64.4672		86.6171	76.7644	73.9144		ZCF7	0.88625	0.484656	0.417976	0.853347	0.322436	0.0912627
ZRT1		72.5622	67.277	72.4975	111.699	130.408	147.675	1	1	1		80.1936	69.2867	72.4975	129.778	130.408	168.708	1	1	1		73.9926	142.964	1		73.9926	155.346	1		ZRT1	2.09949	0.00653298	0.0387783	0.0135149	2.2879e-05	4.08005e-05
ZRT2		199.562	232.277	299.498	937.699	1021.41	575.675	195.867	170.413	189.742		220.55	239.216	299.498	1089.47	1021.41	657.666	196.429	221.056	189.742		253.088	922.848	202.409		253.088	1002.77	232.071		ZRT2	3.96216	0.0079312	0.0341899	0.916959	0.119426	0.0382795
orf19.1424		298.562	298.277	330.498	407.699	374.408	272.675	253.867	261.413	272.742		329.962	307.187	330.498	473.686	374.408	311.511	254.596	339.1	272.742		322.549	386.535	288.813		322.549	420.013	331.136		orf19.1424	1.30217	0.251944	0.0196078	1.02662	0.276674	0.0787706
orf19.1534		103.562	79.277	38.4975	88.6989	190.408	133.675	123.867	87.413	140.742		114.454	81.6452	38.4975	103.055	190.408	152.714	124.223	113.39	140.742		78.1989	148.726	126.118		78.1989	161.607	144.6		orf19.1534	2.06661	0.103186	0.0230696	1.84913	0.109827	0.0356752
orf19.1691		63.5622	65.277	1	5.69887	9.40797	5.67476	9365.87	4710.41	6809.74		70.2471	67.227	1	6.62125	9.40797	6.483	9392.78	6110.25	6809.74		46.158	7.50408	7437.59		46.158	8.154	8527.52		orf19.1691	0.176654	0.162603	0.205647	184.746	0.00177636	0.000976999
orf19.1862		4616.56	5165.28	5439.5	6852.7	6989.41	8081.67	3215.87	3813.41	3757.74		5102.09	5319.58	5439.5	7961.83	6989.41	9232.72	3225.11	4946.68	3757.74		5287.05	8061.32	3976.51		5287.05	8759.51	4559.24		orf19.1862	1.65678	0.0134465	0.13721	0.862341	0.0647871	0.0217757
orf19.2125		1218.56	1306.28	1289.5	865.699	865.408	863.675	2721.87	2047.41	2802.74		1346.72	1345.3	1289.5	1005.82	865.408	986.685	2729.69	2655.86	2802.74		1327.17	952.636	2729.43		1327.17	1035.14	3129.41		orf19.2125	0.779962	0.00143606	0.0346174	2.35795	7.13967e-06	2.60275e-05
orf19.3615		918.562	922.277	855.498	1023.7	833.408	677.675	589.867	479.413	647.742		1015.17	949.828	855.498	1189.39	833.408	774.194	591.561	621.885	647.742		940.164	932.33	620.396		940.164	1013.08	711.311		orf19.3615	1.07755	0.957357	0.15077	0.756582	0.00287077	0.00133601
orf19.409		4626.56	5002.28	4848.5	1892.7	2221.41	2363.67	1909.87	1521.41	1983.74		5113.14	5151.71	4848.5	2199.04	2221.41	2700.33	1915.35	1973.55	1983.74		5037.78	2373.59	1957.55		5037.78	2579.17	2244.41		orf19.409	0.511965	0.000147731	0.155229	0.445516	6.01905e-06	2.60275e-05
orf19.411		182.562	188.277	275.498	569.699	515.408	446.675	183.867	177.413	118.742		201.762	193.901	275.498	661.907	515.408	510.293	184.395	230.137	118.742		223.72	562.536	177.758		223.72	611.257	203.807		orf19.411	2.73224	0.00378796	0.00070452	0.91099	0.329955	0.0923112
orf19.4174		338.562	375.277	430.498	322.699	384.408	295.675	184.867	189.413	176.742		374.169	386.487	430.498	374.929	384.408	337.787	185.398	245.703	176.742		397.051	365.708	202.614		397.051	397.382	232.306		orf19.4174	1.00083	0.231563	0.15077	0.585078	0.0021453	0.0011127
orf19.449		2756.56	3212.28	3838.5	4036.7	3168.41	2848.67	912.867	1460.41	1555.74		3046.47	3308.23	3838.5	4690.05	3168.41	3254.4	915.489	1894.42	1555.74		3397.73	3704.29	1455.22		3397.73	4025.11	1668.47		orf19.449	1.18465	0.604285	0.0837682	0.491053	0.00627753	0.00265876
orf19.4706		640.562	751.277	743.498	622.699	639.408	358.675	448.867	357.413	431.742		707.93	773.719	743.498	723.485	639.408	409.76	450.156	463.629	431.742		741.716	590.884	448.509		741.716	642.06	514.235		orf19.4706	0.865642	0.190009	0.0728214	0.693305	0.000156658	0.000172324
orf19.5517		258.562	291.277	162.498	153.699	184.408	159.675	354.867	153.413	286.742		285.755	299.978	162.498	178.576	184.408	182.417	355.886	199.004	286.742		249.41	181.8	280.544		249.41	197.546	321.656		orf19.5517	0.792051	0.1966	0.0390025	1.28967	0.646957	0.170178
orf19.5626		1490.56	1667.28	1204.5	1685.7	2103.41	2167.67	1778.87	1435.41	2621.74		1647.32	1717.08	1204.5	1958.53	2103.41	2476.41	1783.98	1861.99	2621.74		1522.97	2179.45	2089.24		1522.97	2368.21	2395.4		orf19.5626	1.555	0.0420117	0.0237994	1.57285	0.143428	0.044216
orf19.5848		250.562	319.277	351.498	162.699	147.408	99.6748	85.8667	101.413	93.7421		276.914	328.815	351.498	189.032	147.408	113.871	86.1134	131.551	93.7421		319.075	150.104	103.802		319.075	163.104	119.014		orf19.5848	0.511178	0.00549217	0.00551049	0.372995	0.00118984	0.000745478
orf19.6578		1834.56	2107.28	1850.5	1360.7	1634.41	1707.67	791.867	805.413	1173.74		2027.5	2170.23	1850.5	1580.93	1634.41	1950.89	794.142	1044.77	1173.74		2016.08	1722.08	1004.22		2016.08	1871.23	1151.38		orf19.6578	0.928153	0.117773	0.00385499	0.571098	0.002207	0.0011127
orf19.6660		216.562	259.277	253.498	260.699	262.408	240.675	657.867	488.413	549.742		239.338	267.022	253.498	302.894	262.408	274.953	659.757	633.56	549.742		253.286	280.085	614.353		253.286	304.343	704.382		orf19.6660	1.20158	0.136019	0.00514134	2.78098	0.000451648	0.000358357
orf19.670.2		35350.6	41057.3	43613.5	58450.7	45010.4	43350.7	6238.87	10518.4	9961.74		39068.4	42283.8	43613.5	67911.1	45010.4	49525	6256.79	13644.3	9961.74		41655.2	54148.8	9954.27		41655.2	58838.6	11413		orf19.670.2	1.41252	0.154707	0.312492	0.273987	0.000231083	0.000223688
ARP3		821.562	873.277	1075.5	865.699	1262.41	938.675	1002.87	1017.41	949.742		907.966	899.364	1075.5	1005.82	1262.41	1072.37	1005.75	1319.77	949.742		960.942	1113.53	1091.75		960.942	1209.97	1251.74		ARP3	1.25915	0.186801	0.0109991	1.30262	0.36669	0.10084
CLN3		1113.56	1226.28	728.498	854.699	1167.41	902.675	2652.87	1550.41	2565.74		1230.68	1262.91	728.498	993.035	1167.41	1031.24	2660.49	2011.17	2565.74		1074.03	1063.89	2412.47		1074.03	1156.04	2766		CLN3	1.07636	0.958023	0.0109991	2.57535	0.00735889	0.00301839
CMK2		886.562	995.277	1107.5	1006.7	1169.41	879.675	1408.87	1140.41	1360.74		979.802	1025.01	1107.5	1169.64	1169.41	1004.96	1412.91	1479.32	1360.74		1037.44	1114.67	1417.66		1037.44	1211.21	1625.41		CMK2	1.1675	0.309296	0.356044	1.56675	0.00169672	0.000954901
YRA1		1011.56	1129.28	990.498	1557.7	1213.41	1031.67	779.867	538.413	773.742		1117.95	1163.01	990.498	1809.82	1213.41	1178.61	782.107	698.419	773.742		1090.49	1400.61	751.423		1090.49	1521.92	861.539		YRA1	1.39563	0.216023	0.0188919	0.79005	0.00429982	0.00194497
orf19.3456		79.5622	134.277	98.4975	119.699	53.408	82.6748	56.8667	70.413	38.7421		87.9298	138.288	98.4975	139.073	53.408	94.4499	57.0301	91.3383	38.7421		108.239	95.6435	62.3702		108.239	103.927	71.5101		orf19.3456	0.960167	0.687484	0.0231479	0.660672	0.102528	0.0335296
Sum		724412	777376	800598	634147	736786	644931	696272	538301	698273											Sum	800598	736786	698271
NF		1.10517	1.02987	1	1.16185	1	1.14243	1.00287	1.29718	1											NF	1	1.08661	1.14654

## Sheet: In vivo_Ear-rob1nrg1
Probe Name		Counts after Background subtraction													Normalize count - WT						Normalize count - rob1			Normalize count-robg1ΔΔ+nrg1ΔΔ				Avg_Individual replicates				Normalize to WT-Avg				Probe name	rob1ΔΔ/WT			rob1ΔΔ nrg1ΔΔ/WT
		WT_E1	WT_E2	WT_E3	WT_E4	WT_E5	WT_E6	rob1ΔΔ	rob1ΔΔ	rob1ΔΔ	rob1ΔΔ nrg1ΔΔ	rob1ΔΔ nrg1ΔΔ	rob1ΔΔ nrg1ΔΔ		WT_E1	WT_E2	WT_E3	WT_E4	WT_E5	WT_E6	rob1ΔΔ	rob1ΔΔ	rob1ΔΔ	rob1ΔΔ nrg1ΔΔ	rob1ΔΔ nrg1ΔΔ	rob1ΔΔ nrg1ΔΔ		Avg_WT	Avg_rob1ΔΔ	Avg_rob1ΔΔ nrg1ΔΔ		WT	rob1ΔΔ	rob1ΔΔ nrg1ΔΔ			FC	T-test	FDR	FC	T-test	FDR
ACE2		171.094	146.52	201.292	167.844	191.765	106.039	1297.89	1485.72	976.048	205.789	409.179	220.737		186.906	177.066	201.292	186.264	253.157	255.536	1702.01	1485.72	1359.62	205.789	426.353	393.639		210.037	1515.78	341.927		210.037	8098.11	780.968		ACE2	38.5557	2.78964e-07	1.08885e-05	3.71824	0.0326682	0.0696923
ACS1		1412.09	2601.52	1574.29	2954.84	1594.76	1414.04	857.893	1079.72	949.048	1568.79	1046.18	530.737		1542.6	3143.87	1574.29	3279.13	2105.32	3407.61	1125.01	1079.72	1322.01	1568.79	1090.09	946.458		2508.8	1175.58	1201.78		2508.8	6280.57	2744.89		ACS1	2.50341	0.0377421	0.0115496	1.0941	0.0441509	0.0845344
ACS2		723.094	1369.52	731.292	1497.84	612.765	280.039	143.893	215.719	127.048	520.789	513.179	168.737		789.921	1655.03	731.292	1662.23	808.937	674.85	188.696	215.719	176.976	520.789	534.718	300.908		1053.71	193.797	452.138		1053.71	1035.37	1032.69		ACS2	0.982591	0.0184688	0.00647998	0.980055	0.0733148	0.112601
ADH5		24870.1	12890.5	27998.3	14068.8	20733.8	14121	1884.89	2366.72	1710.05	15205.8	13750.2	10938.7		27168.5	15577.9	27998.3	15612.8	27371.5	34029.5	2471.78	2366.72	2382.07	15205.8	14327.3	19506.9		24626.4	2406.86	16346.7		24626.4	12858.7	37336.1		ADH5	0.52215	0.00157223	0.00110825	1.5161	0.112864	0.148516
AHR1		2491.09	1344.52	2530.29	1423.84	2911.76	1402.04	193.893	265.719	198.048	2022.79	2332.18	899.737		2721.31	1624.82	2530.29	1580.1	3843.95	3378.7	254.264	265.719	275.877	2022.79	2430.06	1604.49		2613.2	265.287	2019.12		2613.2	1417.3	4611.7		AHR1	0.542364	0.00354338	0.00194886	1.76478	0.329744	0.305447
ALS1		4263.09	2930.52	4923.29	3157.84	5836.76	3520.04	461.893	607.719	486.048	2880.79	2595.18	1586.74		4657.08	3541.46	4923.29	3504.4	7705.36	8482.75	605.71	607.719	677.057	2880.79	2704.1	2829.61		5469.06	630.162	2804.83		5469.06	3366.66	6406.3		ALS1	0.615583	0.00665481	0.00303588	1.17137	0.0743743	0.112601
ALS2		42.094	46.5205	41.2919	62.8437	30.7649	4.03852	148.893	243.719	156.048	202.789	92.1787	36.7375		45.9842	56.2188	41.2919	69.7406	40.6141	9.73221	195.253	243.719	217.372	202.789	96.0476	65.5135		43.9303	218.781	121.45		43.9303	1168.85	277.395		ALS2	26.6068	8.02596e-06	4.66655e-05	6.31443	0.0351763	0.07178
ALS3		10774.1	10238.5	10950.3	11292.8	8766.76	3759.04	113.893	158.719	133.048	4986.79	4456.18	1668.74		11769.8	12373	10950.3	12532.2	11573.4	9058.7	149.355	158.719	185.333	4986.79	4643.21	2975.84		11376.2	164.469	4201.95		11376.2	878.682	9597.34		ALS3	0.0772384	1.56738e-06	1.59483e-05	0.843631	7.04655e-05	0.00182962
ALS4		4614.09	648.52	4714.29	781.844	978.765	1001.04	1748.89	2215.72	1290.05	2241.79	1845.18	914.737		5040.52	783.721	4714.29	867.648	1292.11	2412.35	2293.44	2215.72	1797.02	2241.79	1922.62	1631.24		2518.44	2102.06	1931.88		2518.44	11230.3	4412.47		ALS4	4.45923	0.728399	0.161119	1.75206	0.626649	0.507082
ALS5		105.094	35.5205	114.292	21.8437	114.765	27.0385	32.8929	43.7191	41.0478	46.7892	41.1787	8.73748		114.807	42.9256	114.292	24.241	151.506	65.1587	43.1346	43.7191	57.1789	46.7892	42.9071	15.5814		85.4883	48.0109	35.0926		85.4883	256.5	80.1522		ALS5	3.00041	0.243939	0.0545513	0.937581	0.136905	0.172109
ALS6		1	1	1	1	1	1	1	1	1	29.7892	13.1787	1		1	1	1	1	1	1	1	1	1	29.7892	13.7319	1		1	1	14.8404		1	1	33.8957		ALS6	5.34253	1	0.216489	33.8957	0.0387634	0.0758039
ALS7		758.094	512.52	810.292	548.844	1489.76	922.039	226.893	356.719	270.048	535.789	584.179	322.737		828.155	619.368	810.292	609.077	1966.7	2221.97	297.539	356.719	376.172	535.789	608.698	575.534		1175.93	343.477	573.34		1175.93	1835.04	1309.52		ALS7	1.5605	0.0951326	0.0245057	1.11361	0.205343	0.223328
ALS9		56.094	76.5205	82.2919	86.8437	52.7649	6.03852	23.8929	36.7191	21.0478	164.789	89.1787	19.7375		61.2781	92.4731	82.2919	96.3745	69.6572	14.5519	31.3323	36.7191	29.3193	164.789	92.9217	35.1976		69.4378	32.4569	97.6362		69.4378	173.402	223.003		ALS9	2.49723	0.0788411	0.0208366	3.21155	0.384365	0.342611
AOX2		4342.09	2849.52	4840.29	3008.84	3898.76	1830.04	1277.89	2094.72	1351.05	602.789	770.179	230.737		4743.38	3443.57	4840.29	3339.05	5146.93	4410.11	1675.78	2094.72	1881.99	602.789	802.505	411.472		4320.56	1884.16	605.588		4320.56	10066.2	1383.18		AOX2	2.32984	0.00112504	0.000915783	0.320139	8.45434e-05	0.00182962
ARG1		140.094	142.52	139.292	170.844	93.7649	31.0385	104.893	126.719	121.048	64.7892	61.1787	24.7375		153.041	172.232	139.292	189.593	123.783	74.798	137.553	126.719	168.618	64.7892	63.7465	44.1141		142.123	144.297	57.5499		142.123	770.908	131.445		ARG1	5.42422	0.934464	0.204562	0.924868	0.0107342	0.0335861
ARG81		135.094	167.52	142.292	175.844	316.765	112.039	28.8929	40.7191	28.0478	112.789	74.1787	26.7375		147.579	202.444	142.292	195.142	418.175	269.996	37.8892	40.7191	39.0701	112.789	77.2922	47.6806		229.271	39.2261	79.254		229.271	209.567	181.018		ARG81	0.914056	0.0179378	0.00634841	0.789536	0.0488339	0.0870356
BCR1		778.094	557.52	929.292	566.844	1228.76	648.039	301.893	394.719	270.048	697.789	718.179	357.737		850.004	673.75	929.292	629.053	1622.15	1561.67	395.892	394.719	376.172	697.789	748.322	637.949		1044.32	388.928	694.687		1044.32	2077.86	1586.68		BCR1	1.98968	0.0410214	0.0123672	1.51934	0.225411	0.230951
BRG1		3437.09	1575.52	4080.29	1761.84	4078.76	2210.04	388.893	570.719	360.048	2500.79	2353.18	1031.74		3754.74	1903.98	4080.29	1955.2	5384.55	5325.85	509.98	570.719	501.541	2500.79	2451.95	1839.89		3734.1	527.413	2264.21		3734.1	2817.72	5171.5		BRG1	0.754591	0.0102811	0.00422669	1.38494	0.158803	0.186329
CAP1		1603.09	1206.52	1642.29	1321.84	1829.76	928.039	360.893	609.719	376.048	1950.79	1838.18	642.737		1751.25	1458.05	1642.29	1466.91	2415.55	2236.43	473.262	609.719	523.828	1950.79	1915.33	1146.19		1828.41	535.603	1670.77		1828.41	2861.48	3816.07		CAP1	1.565	0.00110858	0.000915783	2.08709	0.611718	0.49786
CAT1		2842.09	1639.52	2983.29	1719.84	907.765	788.039	472.893	586.719	586.048	531.789	406.179	245.737		3104.75	1981.32	2983.29	1908.59	1198.38	1899.05	620.135	586.719	816.355	531.789	423.227	438.221		2179.23	674.403	464.412		2179.23	3603.02	1060.73		CAT1	1.65334	0.0109109	0.00444073	0.486744	0.00566232	0.0225326
CDC10		337.094	691.52	382.292	773.844	224.765	99.0385	5.89294	2.71909	1	323.789	350.179	83.7375		368.247	835.685	382.292	858.77	296.722	238.668	7.72779	2.71909	1	323.789	364.876	149.328		496.731	3.81562	279.331		496.731	20.3851	637.999		CDC10	0.0410385	0.0204194	0.00692286	1.2844	0.243691	0.245084
CDR1		1427.09	1467.52	1524.29	1710.84	1858.76	741.039	295.893	463.719	277.048	1028.79	847.179	324.737		1558.98	1773.46	1524.29	1898.6	2453.84	1785.79	388.023	463.719	385.923	1028.79	882.736	579.101		1832.49	412.555	830.209		1832.49	2204.09	1896.21		CDR1	1.20278	0.000204509	0.000332942	1.03477	0.00255074	0.0133016
CDR2		21.094	25.5205	15.2919	28.8437	1	1	1	1	1	5.78919	3.17874	1		23.0434	30.8408	15.2919	32.0092	1.32014	2.40985	1	1	1	5.78919	3.31216	1.78329		17.4859	1	3.62821		17.4859	1	8.28691		CDR2	0.305534	0.0806187	0.0211689	0.47392	0.131425	0.166709
CHT2		111.094	1230.52	111.292	1301.84	118.765	92.0385	34.8929	57.7191	21.0478	795.789	697.179	355.737		121.361	1487.05	111.292	1444.72	156.787	221.799	45.7574	57.7191	29.3193	795.789	726.441	634.383		590.501	44.2652	718.871		590.501	236.488	1641.92		CHT2	0.400487	0.22044	0.050404	2.78055	0.761714	0.60005
CHT3		298.094	186.52	318.292	190.844	254.765	151.039	127.893	148.719	108.048	1	1	1		325.643	225.405	318.292	211.788	336.326	363.98	167.714	148.719	150.509	1	1	1		296.906	155.647	1		296.906	831.551	1		CHT3	2.80072	0.00721094	0.00319006	0.00336807	9.95927e-05	0.00182962
CIT1		2130.09	2954.52	2228.29	3167.84	2202.76	1362.04	718.893	910.719	1077.05	955.789	806.179	568.737		2326.95	3570.46	2228.29	3515.5	2907.96	3282.3	942.731	910.719	1500.31	955.789	840.016	1014.22		2971.91	1117.92	936.676		2971.91	5972.52	2139.39		CIT1	2.00966	0.00160703	0.00110858	0.719869	0.000680769	0.00599077
CPH1		121.094	124.52	136.292	159.844	71.7649	15.0385	24.8929	9.71909	18.0478	93.7892	94.1787	21.7375		132.285	150.48	136.292	177.386	94.7399	36.2405	32.6437	9.71909	25.1403	93.7892	98.1316	38.7642		121.237	22.501	76.895		121.237	120.212	175.63		CPH1	0.991547	0.0131762	0.00505917	1.44865	0.210315	0.223328
CPH2		1306.09	1103.52	1407.29	1350.84	1844.76	872.039	561.893	684.719	463.048	1698.79	1597.18	1558.74		1426.8	1333.58	1407.29	1499.09	2435.35	2101.48	736.846	684.719	645.018	1698.79	1664.22	2779.68		1700.6	688.861	2047.56		1700.6	3680.26	4676.67		CPH2	2.1641	0.00755408	0.00327076	2.75002	0.370597	0.335705
CRH11		609.094	1114.52	634.292	1133.84	888.765	409.039	39.8929	43.7191	19.0478	156.789	109.179	77.7375		665.385	1346.87	634.292	1258.28	1173.3	985.72	52.3142	43.7191	26.5333	156.789	113.761	138.628		1010.64	40.8555	136.393		1010.64	218.272	311.524		CRH11	0.215974	0.0010818	0.000915783	0.308245	0.00195227	0.0114533
CSA1		2691.09	19588.5	2922.29	21704.8	3442.76	1865.04	423.893	408.719	131.048	3258.79	3520.18	2137.74		2939.8	23672.2	2922.29	24086.9	4544.94	4494.45	555.878	408.719	182.547	3258.79	3667.93	3812.2		10443.4	382.382	3579.64		10443.4	2042.88	8175.97		CSA1	0.195614	0.150645	0.0360857	0.782882	0.307417	0.288562
CSH1		1409.09	4572.52	1657.29	4830.84	903.765	500.039	328.893	371.719	228.048	2163.79	1958.18	912.737		1539.32	5525.78	1657.29	5361.01	1193.1	1205.02	431.298	371.719	317.667	2163.79	2040.37	1627.67		2746.92	373.561	1943.94		2746.92	1995.76	4440.01		CSH1	0.726546	0.100187	0.0253729	1.61636	0.543544	0.465112
DAK2		341.094	267.52	388.292	294.844	151.765	93.0385	84.8929	80.7191	75.0478	526.789	368.179	196.737		372.617	323.292	388.292	327.202	200.351	224.208	111.326	80.7191	104.54	526.789	383.632	350.84		305.994	98.8617	420.42		305.994	528.171	960.249		DAK2	1.72609	0.00297018	0.00165598	3.13813	0.0897266	0.127611
DDR48		7073.09	23028.5	7396.29	24984.8	6700.76	4604.04	1164.89	1513.72	777.048	6602.79	7154.18	4237.74		7726.77	27829.4	7396.29	27726.8	8845.97	11095	1527.6	1513.72	1082.41	6602.79	7454.45	7557.11		15103.4	1374.58	7204.78		15103.4	7343.72	16455.9		DDR48	0.48623	0.0534348	0.0155343	1.08955	0.223999	0.230951
DFG5		269.094	632.52	279.292	644.844	275.765	94.0385	29.8929	42.7191	22.0478	284.789	227.179	118.737		293.963	764.385	279.292	715.613	364.049	226.618	39.2005	42.7191	30.7122	284.789	236.714	211.743		440.653	37.544	244.415		440.653	200.58	558.25		DFG5	0.455187	0.0246227	0.00801717	1.26687	0.209547	0.223328
ECE1		179799	114509	193992	122733	151346	73162	37.8929	46.7191	46.0478	1108.79	1090.18	429.737		196416	138381	193992	136202	199798	176309	49.6914	46.7191	64.1438	1108.79	1135.94	766.346		173516	53.5181	1003.69		173516	285.922	2292.45		ECE1	0.00164781	2.23546e-05	9.09849e-05	0.0132117	2.31795e-05	0.00108789
ECM331		1322.09	1807.52	1346.29	1962.84	1303.76	819.039	47.8929	69.7191	40.0478	868.789	1020.18	225.737		1444.28	2184.34	1346.29	2178.26	1721.16	1973.76	62.8051	69.7191	55.7859	868.789	1063	402.555		1808.01	62.77	778.114		1808.01	335.351	1777.23		ECM331	0.18548	8.81347e-05	0.000179355	0.982973	0.00465684	0.0203568
EFG1		664.094	1408.52	718.292	1477.84	1156.76	438.039	321.893	440.719	268.048	2394.79	2249.18	1403.74		725.468	1702.16	718.292	1640.03	1527.1	1055.61	422.119	440.719	373.386	2394.79	2343.58	2503.27		1228.11	412.075	2413.88		1228.11	2201.52	5513.35		EFG1	1.79261	0.0196436	0.00671845	4.4893	0.00334743	0.0159283
ELF1		125.094	103.52	156.292	124.844	112.765	36.0385	34.8929	23.7191	20.0478	184.789	109.179	41.7375		136.655	125.102	156.292	138.545	148.866	86.8473	45.7574	23.7191	27.9263	184.789	113.761	74.43		132.051	32.4676	124.327		132.051	173.459	283.965		ELF1	1.31357	0.000338222	0.000431916	2.15042	0.772904	0.601242
ENA2		1303.09	1418.52	1430.29	1582.84	1605.76	982.039	378.893	398.719	331.048	676.789	663.179	457.737		1423.52	1714.25	1430.29	1756.55	2119.84	2366.56	496.867	398.719	461.144	676.789	691.014	816.278		1801.84	452.243	728.027		1801.84	2416.12	1662.83		ENA2	1.34092	0.000559701	0.000599468	0.922853	0.00214211	0.0116004
ENA21		2159.09	3905.52	2424.29	4270.84	2266.76	1050.04	554.893	649.719	424.048	1686.79	1933.18	1198.74		2358.63	4719.72	2424.29	4739.55	2992.45	2530.43	727.667	649.719	590.692	1686.79	2014.32	2137.7		3294.18	656.026	1946.27		3294.18	3504.84	4445.32		ENA21	1.06395	0.00597041	0.00285877	1.34945	0.0891341	0.127611
FAV2		166.094	116.52	170.292	93.8437	125.765	26.0385	31.8929	28.7191	21.0478	167.789	111.179	19.7375		181.444	140.812	170.292	104.143	166.028	62.7488	41.8233	28.7191	29.3193	167.789	115.845	35.1976		137.578	33.2872	106.277		137.578	177.838	242.74		FAV2	1.29263	0.00686686	0.00307122	1.76438	0.428891	0.379798
FBP1		1521.09	1090.52	1716.29	1217.84	924.765	399.039	312.893	490.719	356.048	1307.79	743.179	344.737		1661.67	1317.87	1716.29	1351.5	1220.82	961.621	410.317	490.719	495.969	1307.79	774.371	614.766		1371.63	465.668	898.976		1371.63	2487.85	2053.28		FBP1	1.81379	0.00106584	0.000915783	1.49697	0.0660228	0.105636
FDH1		1346.09	2555.52	1463.29	2957.84	1938.76	1222.04	743.893	1013.72	711.048	1216.79	896.179	628.737		1470.5	3088.28	1463.29	3282.45	2559.45	2944.92	975.515	1013.72	990.478	1216.79	933.793	1121.22		2468.15	993.237	1090.6		2468.15	5306.4	2490.96		FDH1	2.14995	0.0187693	0.00652914	1.00924	0.0256027	0.0610992
FGR15		62.094	55.5205	50.2919	56.8437	47.7649	1	19.8929	16.7191	13.0478	62.7892	25.1787	1		67.8326	67.0951	50.2919	63.0821	63.0565	2.40985	26.0869	16.7191	18.1754	62.7892	26.2355	1		52.2947	20.3271	30.0082		52.2947	108.598	68.5395		FGR15	2.07666	0.0735814	0.0197024	1.31064	0.281838	0.2718
FKH2		133.094	63.5205	115.292	92.8437	53.7649	24.0385	17.8929	19.7191	20.0478	69.7892	28.1787	1		145.394	76.7629	115.292	103.033	70.9773	57.9291	23.4642	19.7191	27.9263	69.7892	29.3615	1		94.8981	23.7032	33.3835		94.8981	126.635	76.2487		FKH2	1.33443	0.00820402	0.00351477	0.80348	0.034175	0.0707624
FRP1		1156.09	4330.52	1321.29	4775.84	3064.76	1018.04	373.893	438.719	208.048	2228.79	2324.18	1358.74		1262.94	5233.33	1321.29	5299.97	4045.93	2453.32	490.31	438.719	289.807	2228.79	2421.73	2423.02		3269.46	406.279	2357.85		3269.46	2170.56	5385.37		FRP1	0.663888	0.0358768	0.011062	1.64717	0.436595	0.384204
FRP2		493.094	2073.52	501.292	2195.84	504.765	275.039	89.8929	99.7191	71.0478	626.789	715.179	319.737		538.665	2505.8	501.292	2436.83	666.362	662.8	117.882	99.7191	98.9684	626.789	745.196	570.184		1218.62	105.523	647.39		1218.62	563.761	1478.65		FRP2	0.462621	0.0970969	0.0248544	1.21338	0.359304	0.328507
FRP3		1190.09	1491.52	1242.29	1489.84	1033.76	866.039	605.893	854.719	875.048	914.789	454.179	195.737		1300.08	1802.47	1242.29	1653.35	1364.72	2087.02	794.546	854.719	1218.93	914.789	473.241	349.056		1574.99	956.064	579.029		1574.99	5107.8	1322.51		FRP3	3.24308	0.024364	0.0079969	0.839699	0.003276	0.0159283
FTR1		5565.09	9311.52	6044.29	10192.8	8183.76	3451.04	974.893	1257.72	633.048	8833.79	7701.18	3900.74		6079.41	11252.7	6044.29	11311.5	10803.7	8316.47	1278.44	1257.72	881.825	8833.79	8024.41	6956.14		8968.02	1139.33	7938.11		8968.02	6086.89	18130.8		FTR1	0.678733	0.00122676	0.000958307	2.02172	0.524893	0.453405
GAL1		7377.09	3094.52	7823.29	3351.84	6504.76	3427.04	925.893	1260.72	1006.05	1269.79	1654.18	662.737		8058.87	3739.65	7823.29	3719.69	8587.22	8258.63	1214.18	1260.72	1401.41	1269.79	1723.61	1181.85		6697.89	1292.1	1391.75		6697.89	6903.1	3178.79		GAL1	1.03064	0.00582546	0.00282257	0.474595	0.00648345	0.0242728
GAL4		758.094	744.52	821.292	850.844	616.765	438.039	163.893	226.719	156.048	450.789	501.179	185.737		828.155	899.734	821.292	944.22	814.218	1055.61	214.923	226.719	217.372	450.789	522.214	331.224		893.871	219.671	434.742		893.871	1173.6	992.961		GAL4	1.31294	6.62469e-06	4.49375e-05	1.11085	0.000246642	0.00289393
GAP2		327.094	1032.52	398.292	1134.84	542.765	528.039	381.893	454.719	308.048	2483.79	1542.18	1473.74		357.323	1247.78	398.292	1259.39	716.527	1272.49	500.801	454.719	429.106	2483.79	1606.91	2628.1		875.3	461.542	2239.6		875.3	2465.8	5115.29		GAP2	2.81709	0.159543	0.0377523	5.84405	0.00477114	0.0203568
GCA2		1561.09	385.52	1629.29	395.844	417.765	326.039	334.893	401.719	386.048	1110.79	1105.18	452.737		1705.37	465.892	1629.29	439.286	551.509	785.702	439.167	401.719	537.758	1110.79	1151.57	807.362		929.508	459.548	1023.24		929.508	2455.15	2337.1		GCA2	2.64134	0.221906	0.0504557	2.51434	0.800288	0.615741
GCN4		2526.09	2770.52	2607.29	2791.84	2439.76	1283.04	570.893	862.719	732.048	2191.79	2328.18	716.737		2759.55	3348.11	2607.29	3098.24	3220.84	3091.92	748.649	862.719	1019.73	2191.79	2425.9	1278.15		3020.99	877.033	1965.28		3020.99	4685.57	4488.74		GCN4	1.55101	5.78518e-06	4.49375e-05	1.48585	0.00754556	0.0259126
GIS2		748.094	361.52	825.292	384.844	539.765	273.039	235.893	300.719	293.048	857.789	548.179	223.737		817.231	436.888	825.292	427.079	712.567	657.981	309.342	300.719	408.211	857.789	571.187	398.989		646.173	339.424	609.322		646.173	1813.38	1391.7		GIS2	2.80634	0.0255146	0.00817672	2.15376	0.79658	0.615741
GNP1		12312.1	6378.52	14128.3	6951.84	9610.76	5358.04	1300.89	1666.72	1217.05	5524.79	3189.18	2172.74		13449.9	7708.28	14128.3	7714.78	12687.6	12912	1705.94	1666.72	1695.33	5524.79	3323.03	3874.62		11433.5	1689.33	4240.81		11433.5	9025.3	9686.11		GNP1	0.789374	0.000839041	0.000853723	0.84717	0.00523384	0.0216742
GPD2		399.094	176.52	467.292	177.844	499.765	246.039	20.8929	21.7191	27.0478	242.789	130.179	55.7375		435.977	213.321	467.292	197.361	659.761	592.915	27.3983	21.7191	37.6772	242.789	135.643	99.396		427.771	28.9315	159.276		427.771	154.567	363.79		GPD2	0.361332	0.0100101	0.00415726	0.85043	0.0560336	0.0958444
HAC1		605.094	740.52	593.292	826.844	645.765	237.039	113.893	129.719	113.048	657.789	499.179	177.737		661.015	894.901	593.292	917.586	852.502	571.226	149.355	129.719	157.474	657.789	520.13	316.957		748.42	145.516	498.292		748.42	777.423	1138.11		HAC1	1.03875	0.00036886	0.000454918	1.52068	0.064782	0.105636
HAP2		184.094	324.52	189.292	393.844	468.765	171.039	56.8929	67.7191	37.0478	417.789	353.179	284.737		201.108	392.175	189.292	437.066	618.837	412.176	74.6074	67.7191	51.607	417.789	368.002	507.769		375.109	64.6445	431.187		375.109	345.365	984.84		HAP2	0.920706	0.0146136	0.00544453	2.62548	0.592111	0.490407
HAP3		29.094	56.5205	26.2919	66.8437	41.7649	8.03852	13.8929	19.7191	11.0478	47.7892	40.1787	1		31.7828	68.3036	26.2919	74.1796	55.1356	19.3716	18.2187	19.7191	15.3894	47.7892	41.8651	1		45.8442	17.7757	30.2181		45.8442	94.9674	69.0188		HAP3	2.07153	0.0822609	0.0214617	1.50551	0.384465	0.342611
HAP43		229.094	357.52	307.292	379.844	501.765	228.039	118.893	161.719	103.048	584.789	498.179	186.737		250.266	432.055	307.292	421.53	662.401	549.538	155.912	161.719	143.544	584.789	519.088	333.007		437.18	153.725	478.961		437.18	821.28	1093.96		HAP43	1.87858	0.0168581	0.00601864	2.5023	0.698085	0.561659
HEM1		161.094	115.52	159.292	152.844	187.765	45.0385	37.8929	40.7191	22.0478	230.789	134.179	34.7375		175.982	139.604	159.292	169.618	247.877	108.536	49.6914	40.7191	30.7122	230.789	139.81	61.947		166.818	40.3743	144.182		166.818	215.701	329.315		HEM1	1.29303	0.00278689	0.00157537	1.9741	0.609756	0.49786
HGT7		10475.1	3268.52	10598.3	3506.84	8920.76	4072.04	2358.89	4271.72	3317.05	2427.79	2228.18	812.737		11443.2	3949.93	10598.3	3891.71	11776.7	9812.98	3093.37	4271.72	4620.59	2427.79	2321.7	1449.35		8578.79	3995.23	2066.28		8578.79	21344.6	4719.42		HGT7	2.48807	0.0773304	0.0205709	0.550127	0.0212582	0.0534492
HOG1		211.094	396.52	234.292	434.844	172.765	74.0385	40.8929	31.7191	27.0478	264.789	183.179	55.7375		230.603	479.185	234.292	482.566	228.074	178.421	53.6255	31.7191	37.6772	264.789	190.867	99.396		305.524	41.0073	185.017		305.524	219.083	422.584		HOG1	0.717072	0.0146962	0.00544453	1.38315	0.212542	0.223328
HSP104		8048.09	2518.52	9155.29	2670.84	4472.76	3800.04	13067.9	13574.7	7937.05	10558.8	16759.2	17399.7		8791.88	3043.57	9155.29	2963.96	5904.69	9157.51	17136.8	13574.7	11056.2	10558.8	17462.6	31028.8		6502.82	13922.6	19683.4		6502.82	74381.7	44957.3		HSP104	11.4384	0.00996369	0.00415726	6.91351	0.0185258	0.0500585
HSP70		10830.1	6390.52	12551.3	7130.84	4478.76	3663.04	13092.9	14923.7	10452	17072.8	22659.2	17794.7		11831	7722.78	12551.3	7913.42	5912.61	8827.36	17169.6	14923.7	14559.5	17072.8	23610.2	31733.2		9126.41	15550.9	24138.7		9126.41	83081.3	55133.4		HSP70	9.1034	0.00548109	0.00272049	6.04108	0.00212255	0.0116004
HTA1		4114.09	4302.52	4320.29	4824.84	4038.76	2070.04	549.893	702.719	434.048	1935.79	1482.18	860.737		4494.31	5199.49	4320.29	5354.35	5331.75	4988.47	721.11	702.719	604.622	1935.79	1544.39	1534.94		4948.11	676.15	1671.71		4948.11	3612.35	3818.21		HTA1	0.730047	8.64811e-07	1.17326e-05	0.771651	7.17088e-06	0.00050483
HTA2		1216.09	1544.52	1394.29	1625.84	1288.76	715.039	356.893	360.719	324.048	797.789	586.179	241.737		1328.48	1866.51	1394.29	1804.27	1701.35	1723.13	468.017	360.719	451.393	797.789	610.782	431.088		1636.34	426.71	613.22		1636.34	2279.71	1400.61		HTA2	1.39317	4.26983e-05	0.000124334	0.855938	0.000244946	0.00289393
HWP1		39715.1	43402.5	42031.3	48826.8	25640.8	14473	50.8929	40.7191	21.0478	4293.79	4197.18	2263.74		43385.5	52450.9	42031.3	54185.4	33849.5	34877.8	66.7392	40.7191	29.3193	4293.79	4373.34	4036.9		43463.4	45.5925	4234.68		43463.4	243.579	9672.09		HWP1	0.00560424	6.1039e-05	0.000138016	0.222534	0.000116878	0.00182962
HYR1		6385.09	18549.5	7065.29	20574.8	3514.76	1656.04	20.8929	12.7191	12.0478	226.789	164.179	102.737		6975.19	22416.6	7065.29	22832.8	4639.99	3990.8	27.3983	12.7191	16.7824	226.789	171.07	183.211		11320.1	18.9666	193.69		11320.1	101.33	442.392		HYR1	0.00895127	0.0697943	0.0191602	0.0390801	0.0732867	0.112601
IFD6		512.094	605.52	538.292	666.844	140.765	100.039	205.893	216.719	162.048	149.789	225.179	64.7375		559.42	731.756	538.292	740.027	185.83	241.077	270.001	216.719	225.73	149.789	234.63	115.446		499.401	237.483	166.622		499.401	1268.76	380.567		IFD6	2.54057	0.108353	0.0272219	0.762048	0.0538834	0.0948348
IHD1		4548.09	8534.52	5150.29	9013.84	5327.76	1973.04	441.893	472.719	367.048	14098.8	8743.18	4482.74		4968.42	10313.8	5150.29	10003.1	7033.41	4754.72	579.483	472.719	511.292	14098.8	9110.15	7994.02		7037.28	521.164	10401		7037.28	2784.34	23756.1		IHD1	0.395655	0.00369641	0.00197952	3.37575	0.129637	0.165935
INO4		95.094	168.52	82.2919	192.844	112.765	40.0385	42.8929	31.7191	33.0478	93.7892	38.1787	11.7375		103.882	203.653	82.2919	214.008	148.866	96.4866	56.2483	31.7191	46.0351	93.7892	39.7812	20.9313		141.531	44.6675	51.5006		141.531	238.637	117.628		INO4	1.68611	0.0254811	0.00817672	0.831113	0.0444286	0.0845344
IRE1		211.094	318.52	214.292	347.844	340.765	184.039	30.8929	68.7191	33.0478	517.789	341.179	190.737		230.603	384.924	214.292	386.018	449.858	443.504	40.5119	68.7191	46.0351	517.789	355.499	340.14		351.533	51.7553	404.476		351.533	276.504	923.832		IRE1	0.786567	0.00193949	0.00127318	2.62801	0.488041	0.424174
IRO1		431.094	610.52	545.292	673.844	578.765	274.039	52.8929	54.7191	62.0478	1316.79	1006.18	456.737		470.935	737.799	545.292	747.795	764.052	660.391	69.3619	54.7191	86.4316	1316.79	1048.41	814.495		654.377	70.1709	1059.9		654.377	374.89	2420.83		IRO1	0.572896	8.78634e-05	0.000179355	3.69944	0.011508	0.0352246
KIP4		996.094	1533.52	1092.29	1671.84	812.765	456.039	44.8929	63.7191	62.0478	1147.79	1017.18	441.737		1088.15	1853.22	1092.29	1855.32	1072.97	1098.98	58.871	63.7191	86.4316	1147.79	1059.87	787.745		1343.49	69.6739	998.469		1343.49	372.235	2280.52		KIP4	0.277066	0.00102531	0.000915783	1.69746	0.205009	0.223328
KRE1		449.094	550.52	460.292	640.844	750.765	350.039	89.8929	132.719	85.0478	770.789	969.179	195.737		490.598	665.29	460.292	711.174	991.117	843.539	117.882	132.719	118.47	770.789	1009.86	349.056		693.668	123.024	709.901		693.668	657.259	1621.43		KRE1	0.947512	0.00225327	0.00136878	2.33747	0.928934	0.703193
MAC1		87.094	194.52	85.2919	224.844	72.7649	23.0385	11.8929	11.7191	5.04781	60.7892	59.1787	35.7375		95.143	235.073	85.2919	249.519	96.0601	55.5193	15.596	11.7191	7.03152	60.7892	61.6626	63.7302		136.101	11.4489	62.0607		136.101	61.1659	141.748		MAC1	0.449415	0.0415234	0.0124265	1.04149	0.182313	0.210407
MAE1		751.094	1056.52	893.292	1219.84	526.765	285.039	160.893	191.719	164.048	403.789	338.179	132.737		820.508	1276.78	893.292	1353.72	695.405	686.899	210.989	191.719	228.516	403.789	352.373	236.709		954.433	210.408	330.957		954.433	1124.11	755.913		MAE1	1.17778	0.00368462	0.00197952	0.792002	0.00968074	0.0309784
MBF1		1739.09	1864.52	2072.29	2030.84	1920.76	1033.04	470.893	650.719	525.048	3087.79	2691.18	1040.74		1899.82	2253.23	2072.29	2253.72	2535.68	2489.46	617.512	650.719	731.383	3087.79	2804.13	1855.94		2250.7	666.538	2582.62		2250.7	3561	5898.76		MBF1	1.58217	1.2688e-05	5.7378e-05	2.62085	0.280054	0.2718
MDM34		10184.1	6119.52	10903.3	6895.84	10397.8	5753.04	2082.89	2880.72	1977.05	3700.79	4201.18	2753.74		11125.3	7395.29	10903.3	7652.63	13726.5	13863.9	2731.43	2880.72	2754	3700.79	4377.51	4910.71		10777.8	2788.72	4329.67		10777.8	14898.8	9889.06		MDM34	1.38236	0.00207958	0.00130934	0.917537	0.00670959	0.0242728
MET28		612.094	560.52	627.292	608.844	513.765	205.039	233.893	325.719	239.048	1690.79	1119.18	436.737		668.662	677.375	627.292	675.662	678.243	494.111	306.719	325.719	332.99	1690.79	1166.15	778.829		636.891	321.809	1211.92		636.891	1719.28	2768.06		MET28	2.69948	0.000175331	0.000309337	4.34621	0.0145684	0.042734
NDT80		604.094	555.52	717.292	583.844	841.765	278.039	174.893	196.719	140.048	425.789	292.179	148.737		659.923	671.333	717.292	647.918	1111.25	670.03	229.348	196.719	195.084	425.789	304.442	265.242		746.291	207.051	331.824		746.291	1106.17	757.894		NDT80	1.48223	0.00157932	0.00110825	1.01555	0.00775594	0.0260009
NPR1		163.094	138.52	187.292	141.844	215.765	88.0385	17.8929	30.7191	19.0478	167.789	124.179	22.7375		178.167	167.399	187.292	157.411	284.841	212.159	23.4642	30.7191	26.5333	167.789	129.391	40.5475		197.878	26.9055	112.576		197.878	143.743	257.126		NPR1	0.726425	0.000472778	0.000534504	1.29942	0.0554552	0.0958444
NRG1		1078.09	441.52	1194.29	482.844	2343.76	956.039	467.893	645.719	410.048	1	1	1		1177.73	533.566	1194.29	535.834	3094.1	2303.91	613.578	645.719	571.19	1	1	1		1473.24	610.162	1		1473.24	3259.81	1		NRG1	2.21268	0.201442	0.0465834	0.000678777	0.0470831	0.084991
PCK1		18953.1	11821.5	20346.3	12848.8	14040.8	6109.04	829.893	1055.72	795.048	7682.79	3956.18	3927.74		20704.7	14286	20346.3	14259	18535.8	14721.8	1088.29	1055.72	1107.49	7682.79	4122.23	7004.29		17142.3	1083.83	6269.77		17142.3	5790.41	14320.3		PCK1	0.337786	5.14845e-05	0.000124334	0.835379	0.000890577	0.00729526
PES1		1.09399	1	4.29192	7.84374	3.76489	1	1	8.71909	1.04781	1	1	1		1.19509	1.20848	4.29192	8.70456	4.9702	2.40985	1	8.71909	1.45958	1	1	1		3.79668	3.72622	1		3.79668	19.9075	1		PES1	5.24338	0.977107	0.212664	0.263388	0.146647	0.179254
PFK2		2216.09	1424.52	2526.29	1551.84	3072.76	1403.04	518.893	717.719	458.048	3167.79	2274.18	1971.74		2420.9	1721.5	2526.29	1722.15	4056.49	3381.11	680.458	717.719	638.053	3167.79	2369.63	3516.18		2638.07	678.743	3017.87		2638.07	3626.21	6892.87		PFK2	1.37457	0.00955946	0.00405281	2.61284	0.545053	0.465112
PGA13		1301.09	5552.52	1436.29	5929.84	1844.76	1050.04	92.8929	93.7191	35.0478	6550.79	8190.18	3976.74		1421.34	6710.08	1436.29	6580.62	2435.35	2530.43	121.816	93.7191	48.821	6550.79	8533.94	7091.67		3519.02	88.1189	7392.13		3519.02	470.778	16883.8		PGA13	0.133781	0.052892	0.0154871	4.79787	0.0386542	0.0758039
PGA17		4.09399	46.5205	18.2919	60.8437	90.7649	33.0385	16.8929	11.7191	7.04781	12.7892	3.17874	1		4.47234	56.2188	18.2919	67.5211	119.823	79.6177	22.1528	11.7191	9.81748	12.7892	3.31216	1		57.6574	14.5631	5.70045		57.6574	77.8039	13.0199		PGA17	1.34942	0.131397	0.032216	0.225816	0.0783183	0.117311
PGA25		8.09399	32.5205	9.29192	39.8437	67.7649	38.0385	16.8929	9.71909	6.04781	1	1	1		8.84201	39.3002	9.29192	44.2164	89.4594	91.667	22.1528	9.71909	8.4245	1	1	1		47.1295	13.4321	1		47.1295	71.7615	1		PGA25	1.52265	0.171688	0.0401592	0.0212181	0.0736588	0.112601
PGA34		795.094	786.52	847.292	863.844	1013.76	458.039	41.8929	49.7191	35.0478	34.7892	20.1787	1		868.575	950.49	847.292	958.647	1338.31	1103.8	54.9369	49.7191	48.821	34.7892	21.0257	1		1011.19	51.159	18.9383		1011.19	273.319	43.2555		PGA34	0.270295	5.19334e-05	0.000124334	0.0427769	4.23654e-05	0.00149126
PGA37		86.094	160.52	112.292	178.844	149.765	34.0385	22.8929	25.7191	5.04781	175.789	325.179	190.737		94.0506	193.985	112.292	198.471	197.711	82.0276	30.021	25.7191	7.03152	175.789	338.827	340.14		146.423	20.9239	284.919		146.423	111.786	650.761		PGA37	0.763449	0.00748014	0.00327076	4.44439	0.0253928	0.0610992
PGA48		5280.09	2991.52	5297.29	3195.84	4568.76	3080.04	218.893	404.719	273.048	1204.79	871.179	424.737		5768.07	3615.18	5297.29	3546.57	6031.42	7422.42	287.048	404.719	380.351	1204.79	907.744	757.43		5280.16	357.373	956.654		5280.16	1909.28	2185.02		PGA48	0.361594	0.000897513	0.000878035	0.413817	0.00192563	0.0114533
PGA53		200.094	373.52	241.292	479.844	90.7649	56.0385	104.893	143.719	92.0478	97.7892	105.179	36.7375		218.586	451.39	241.292	532.505	119.823	135.044	137.553	143.719	128.221	97.7892	109.593	65.5135		283.107	136.498	90.9653		283.107	729.243	207.767		PGA53	2.57586	0.193074	0.0449035	0.733882	0.101992	0.138081
PGA7		1374.09	6978.52	1615.29	7515.84	3021.76	1477.04	230.893	283.719	140.048	1581.79	1727.18	739.737		1501.08	8433.37	1615.29	8340.68	3989.16	3559.43	302.785	283.719	195.084	1581.79	1799.67	1319.17		4573.17	260.529	1566.88		4573.17	1391.89	3578.78		PGA7	0.304359	0.0539235	0.0155652	0.782559	0.151264	0.180491
PHO89		846.094	1782.52	903.292	1989.84	924.765	654.039	68.8929	81.7191	46.0478	440.789	464.179	202.737		924.288	2154.13	903.292	2208.22	1220.82	1576.13	90.3437	81.7191	64.1438	440.789	483.661	361.539		1497.81	78.7356	428.663		1497.81	420.647	979.076		PHO89	0.280841	0.00474251	0.00241275	0.65367	0.0183066	0.0500585
PHR1		3664.09	7632.52	4072.29	8429.84	3667.76	1892.04	89.8929	78.7191	69.0478	2143.79	1851.18	682.737		4002.72	9223.71	4072.29	9354.98	4841.97	4559.52	117.882	78.7191	96.1825	2143.79	1928.88	1217.52		6009.2	97.5946	1763.39		6009.2	521.402	4027.63		PHR1	0.0867673	0.0061797	0.00292458	0.670244	0.0282788	0.066361
PHR2		737.094	988.52	851.292	1084.84	996.765	367.039	240.893	281.719	221.048	1095.79	1146.18	639.737		805.214	1194.6	851.292	1203.9	1315.87	884.506	315.898	281.719	307.916	1095.79	1194.29	1140.84		1042.56	301.844	1143.64		1042.56	1612.61	2612.09		PHR2	1.54678	0.000791232	0.000825719	2.50545	0.471206	0.412085
PIL1		5738.09	7381.52	6175.29	7946.84	2253.76	1895.04	1353.89	1710.72	1075.05	3977.79	3674.18	1599.74		6268.39	8920.38	6175.29	8818.98	2975.29	4566.75	1775.45	1710.72	1497.52	3977.79	3828.39	2852.79		6287.52	1661.23	3552.99		6287.52	8875.17	8115.11		PIL1	1.41155	0.0129186	0.00500751	1.29067	0.0945726	0.133158
PIR1		7471.09	1993.52	8155.29	2080.84	3470.76	2936.04	661.893	991.719	805.048	1463.79	1818.18	663.737		8161.55	2409.12	8155.29	2309.21	4581.91	7075.4	867.983	991.719	1121.42	1463.79	1894.49	1183.64		5448.75	993.707	1513.97		5448.75	5308.91	3457.94		PIR1	0.974336	0.0292266	0.00915017	0.634631	0.0470298	0.084991
PLB5		231.094	408.52	263.292	427.844	371.765	129.039	29.8929	43.7191	38.0478	197.789	168.179	74.7375		252.451	493.687	263.292	474.798	490.783	310.963	39.2005	43.7191	53	197.789	175.238	133.279		380.996	45.3065	168.768		380.996	242.051	385.471		PLB5	0.635313	0.00200306	0.00129404	1.01175	0.0204972	0.0524728
POL1		61.094	130.52	70.2919	119.844	49.7649	24.0385	14.8929	6.71909	8.04781	90.7892	47.1787	5.73748		66.7401	157.731	70.2919	132.996	65.6968	57.9291	19.5301	6.71909	11.2105	90.7892	49.1589	10.2316		91.8975	12.4865	50.0599		91.8975	66.7097	114.338		POL1	0.725915	0.0167555	0.00601864	1.24419	0.199491	0.222923
PRA1		2050.09	23608.5	2497.29	26134.8	1580.76	1155.04	111.893	114.719	51.0478	1278.79	1844.18	513.737		2239.56	28530.3	2497.29	29003	2086.84	2783.46	146.732	114.719	71.1088	1278.79	1921.58	916.142		11190.1	110.853	1372.17		11190.1	592.238	3134.07		PRA1	0.0529252	0.215583	0.0495719	0.280076	0.266966	0.26471
RBR1		90.094	84.5205	129.292	73.8437	162.765	40.0385	22.8929	14.7191	13.0478	64.7892	48.1787	5.73748		98.4203	102.141	129.292	81.9478	214.873	96.4866	30.021	14.7191	18.1754	64.7892	50.2009	10.2316		120.527	20.9718	41.7406		120.527	112.043	95.3363		RBR1	0.929607	0.0114352	0.00456285	0.790997	0.0386474	0.0758039
RBR2		57.094	116.52	50.2919	147.844	156.765	116.039	38.8929	51.7191	28.0478	41.7892	21.1787	18.7375		62.3705	140.812	50.2919	164.069	206.952	279.635	51.0028	51.7191	39.0701	41.7892	22.0677	33.4143		150.688	47.264	32.4237		150.688	252.509	74.0565		RBR2	1.67571	0.0876818	0.0227302	0.491454	0.0578436	0.0969569
RBT1		42.094	25.5205	58.2919	32.8437	22.7649	6.03852	1	1	1	1	1	1		45.9842	30.8408	58.2919	36.4482	30.0529	14.5519	1	1	1	1	1	1		36.0283	1	1		36.0283	1	1		RBT1	0.148287	0.00576118	0.00282257	0.0277559	0.00576118	0.0225326
RBT5		6645.09	37538.5	7578.29	39023.8	13588.8	7244.04	1336.89	1416.72	713.048	10694.8	9604.18	8114.74		7259.22	45364.4	7578.29	43306.6	17939.1	17457	1753.15	1416.72	993.264	10694.8	10007.3	14470.9		23150.8	1387.71	11724.3		23150.8	7413.89	26778.6		RBT5	0.320244	0.0701442	0.0191602	1.15671	0.300992	0.286349
RCT1		3097.09	9731.52	3670.29	10665.8	3910.76	2104.04	738.893	928.719	527.048	6124.79	6245.18	3547.74		3383.32	11760.3	3670.29	11836.4	5162.77	5070.41	968.958	928.719	734.169	6124.79	6507.3	6326.64		6813.91	877.282	6319.58		6813.91	4686.9	14434		RCT1	0.687844	0.039286	0.0119324	2.11832	0.839247	0.6407
RFG1		576.094	758.52	555.292	782.844	506.765	253.039	932.893	1197.72	843.048	1393.79	1541.18	461.737		629.335	916.653	555.292	868.758	669.002	609.784	1223.36	1197.72	1174.35	1393.79	1605.86	823.411		708.137	1198.48	1274.36		708.137	6402.9	2910.65		RFG1	9.0419	0.000906085	0.000878035	4.1103	0.0150081	0.0431253
RFX2		277.094	355.52	294.292	413.844	239.765	99.0385	13.8929	1.71909	1	425.789	329.179	174.737		302.702	429.638	294.292	459.261	316.524	238.668	18.2187	1.71909	1	425.789	342.995	311.607		340.181	6.97926	360.131		340.181	37.2869	822.546		RFX2	0.109609	0.000332988	0.000431916	2.41797	0.73102	0.584816
RHR2		1739.09	752.52	2011.29	852.844	1211.76	544.039	143.893	157.719	86.0478	1131.79	662.179	258.737		1899.82	909.402	2011.29	946.44	1599.7	1311.05	188.696	157.719	119.863	1131.79	689.972	461.404		1446.28	155.426	761.055		1446.28	830.369	1738.27		RHR2	0.574139	0.00251334	0.00144075	1.20188	0.0621294	0.102915
RIM101		7090.09	4789.52	8296.29	4943.84	7170.76	3828.04	731.893	864.719	552.048	1474.79	1736.18	1521.74		7745.34	5788.02	8296.29	5486.41	9466.44	9224.98	959.778	864.719	768.994	1474.79	1809.05	2713.7		7667.91	864.497	1999.18		7667.91	4618.6	4566.17		RIM101	0.602328	0.000273646	0.000412502	0.59549	0.000961195	0.00729526
RNR22		5482.09	3580.52	6264.29	3989.84	4644.76	2301.04	595.893	998.719	598.048	5873.79	3585.18	2181.74		5988.74	4326.97	6264.29	4427.71	6131.75	5545.15	781.433	998.719	833.071	5873.79	3735.66	3890.67		5447.44	871.074	4500.04		5447.44	4653.74	10278.2		RNR22	0.854299	4.82251e-05	0.000124334	1.88679	0.209368	0.223328
ROB1		354.094	395.52	392.292	418.844	293.765	174.039	1.89294	1.71909	1	1	1	1		386.818	477.977	392.292	464.81	387.812	419.406	2.48233	1.71909	1.39298	1	1	1		421.519	1.8648	1		421.519	9.96275	1		ROB1	0.0236353	5.35063e-07	1.08885e-05	0.00237237	5.27426e-07	7.42616e-05
RPN4		479.094	351.52	522.292	361.844	512.765	276.039	482.893	702.719	553.048	1373.79	1817.18	512.737		523.371	424.804	522.292	401.555	676.923	665.21	633.249	702.719	770.387	1373.79	1893.45	914.359		535.692	702.118	1393.87		535.692	3751.09	3183.62		RPN4	7.00231	0.0593905	0.0166703	5.943	0.00339381	0.0159283
RTA3		7.09399	14.5205	21.2919	2.84374	1.76489	1	0.892938	0.719086	1	1	1	1		7.74959	17.5476	21.2919	3.15583	2.32991	2.40985	1.17097	0.719086	1	1	1	1		9.08079	0.963351	1		9.08079	5.14673	1		RTA3	0.566771	0.147447	0.0357775	0.110123	0.148968	0.179271
SAP1		79.094	75.5205	67.2919	61.8437	52.7649	12.0385	1	1	1	1	1	1		86.4037	91.2646	67.2919	68.6308	69.6572	29.011	1	1	1	1	1	1		68.7099	1	1		68.7099	1	1		SAP1	0.0777549	0.00129413	0.000958307	0.014554	0.00129413	0.00893637
SAP10		8.09399	22.5205	13.2919	25.8437	14.7649	1	10.8929	6.71909	2.04781	20.7892	14.1787	1		8.84201	27.2154	13.2919	28.68	19.4918	2.40985	14.2846	6.71909	2.85257	20.7892	14.7738	1		16.6552	7.95209	12.1877		16.6552	42.4843	27.8369		SAP10	2.55082	0.22784	0.0512326	1.67137	0.559695	0.474729
SAP2		6.09399	1.52046	4.29192	9.84374	1	1	1	1	1	1	1	1		6.65718	1.83743	4.29192	10.9241	1.32014	2.40985	1	1	1	1	1	1		4.57343	1	1		4.57343	1	1		SAP2	1.16817	0.147681	0.0357775	0.218654	0.147681	0.179254
SAP4		2636.09	2643.52	2649.29	2853.84	2222.76	562.039	13.8929	1	7.04781	167.789	53.1787	45.7375		2879.72	3194.63	2649.29	3167.04	2934.37	1354.43	18.2187	1	9.81748	167.789	55.4107	81.5631		2696.58	9.67873	101.588		2696.58	51.7089	232.028		SAP4	0.0191757	0.000321895	0.000431916	0.0860455	0.000401435	0.00434785
SAP5		8826.09	13279.5	9586.29	14592.8	8715.76	2864.04	12.8929	6.71909	17.0478	244.789	103.179	71.7375		9641.78	16048	9586.29	16194.3	11506.1	6901.89	16.9073	6.71909	23.7473	244.789	107.509	127.929		11646.4	15.7912	160.076		11646.4	84.3652	365.616		SAP5	0.00724389	0.00129501	0.000958307	0.0313931	0.00139093	0.00893637
SAP6		2719.09	2945.52	2925.29	3304.84	1271.76	405.039	1	1	1	1	1	1		2970.39	3559.59	2925.29	3667.54	1678.91	976.08	1	1	1	1	1	1		2629.63	1	1		2629.63	1	1		SAP6	0.00203166	0.00463273	0.00238674	0.000380281	0.00463273	0.0203568
SAP9		2890.09	3583.52	3193.29	3925.84	3883.76	1905.04	271.893	405.719	251.048	1436.79	1404.18	646.737		3157.19	4330.6	3193.29	4356.69	5127.13	4590.85	356.551	405.719	349.705	1436.79	1463.11	1153.32		4125.96	370.658	1351.07		4125.96	1980.25	3085.88		SAP9	0.47995	9.48723e-05	0.000183871	0.747919	0.000649194	0.00599077
SCW11		224.094	85.5205	237.292	121.844	192.765	94.0385	42.8929	30.7191	35.0478	4.78919	7.17874	1		244.804	103.349	237.292	135.216	254.477	226.618	56.2483	30.7191	48.821	4.78919	7.48005	1		200.293	45.2628	4.42308		200.293	241.818	10.1024		SCW11	1.20732	0.00514422	0.00258481	0.0504382	0.00139631	0.00893637
SCW4		35.094	73.5205	26.2919	93.8437	123.765	70.0385	25.8929	21.7191	7.04781	1	1	1		38.3373	88.8476	26.2919	104.143	163.387	168.782	33.9551	21.7191	9.81748	1	1	1		98.2982	21.8305	1		98.2982	116.63	1		SCW4	1.1865	0.0728641	0.0196395	0.0101731	0.0304009	0.0683644
SEF1		311.094	274.52	342.292	308.844	649.765	269.039	44.8929	45.7191	50.0478	257.789	195.179	33.7375		339.845	331.751	342.292	342.738	857.783	648.341	58.871	45.7191	69.7158	257.789	203.371	60.1637		477.125	58.102	173.775		477.125	310.411	396.905		SEF1	0.650587	0.0165829	0.00601864	0.831868	0.0657156	0.105636
SEF2		143.094	239.52	132.292	248.844	238.765	68.0385	68.8929	64.7191	60.0478	435.789	412.179	106.737		156.318	289.455	132.292	276.153	315.204	163.962	90.3437	64.7191	83.6456	435.789	429.479	190.344		222.231	79.5695	351.871		222.231	425.102	803.68		SEF2	1.91289	0.0207409	0.00692286	3.61642	0.111615	0.148259
SGA1		139.094	112.52	121.292	109.844	194.765	62.0385	20.8929	27.7191	24.0478	359.789	250.179	89.7375		151.949	135.978	121.292	121.899	257.118	149.503	27.3983	27.7191	33.4982	359.789	260.679	160.028		156.29	29.5385	260.165		156.29	157.81	594.223		SGA1	1.00973	0.00430798	0.00224788	3.80206	0.0696946	0.110258
SIN3		304.094	302.52	389.292	368.844	218.765	119.039	105.893	140.719	120.048	369.789	240.179	70.7375		332.198	365.588	389.292	409.323	288.801	286.864	138.864	140.719	167.225	369.789	250.259	126.145		345.344	148.936	248.731		345.344	795.695	568.108		SIN3	2.30406	0.000415122	0.000482725	1.64505	0.124476	0.160791
SIT1		752.094	2431.52	837.292	2660.84	1630.76	723.039	162.893	162.719	111.048	683.789	846.179	368.737		821.601	2938.43	837.292	2952.86	2152.84	1742.41	213.612	162.719	154.688	683.789	881.694	657.565		1907.57	177.006	741.016		1907.57	945.661	1692.5		SIT1	0.495741	0.019139	0.00660135	0.887252	0.0812319	0.11914
SMC2		49.094	83.5205	39.2919	103.844	29.7649	1	10.8929	18.7191	16.0478	26.7892	12.1787	1		53.6311	100.932	39.2919	115.24	39.2939	2.40985	14.2846	18.7191	22.3543	26.7892	12.6899	1		58.4666	18.4527	13.493		58.4666	98.584	30.8184		SMC2	1.68616	0.15774	0.0375439	0.527111	0.123846	0.160791
SOD4		243.094	294.52	241.292	364.844	238.765	117.039	41.8929	38.7191	37.0478	367.789	374.179	103.737		265.56	355.921	241.292	404.884	315.204	282.045	54.9369	38.7191	51.607	367.789	389.884	184.994		310.818	48.421	314.222		310.818	258.691	717.69		SOD4	0.832291	0.000182409	0.000309337	2.30904	0.95322	0.717719
SOD5		40524.1	50504.5	45886.3	54901.8	31343.8	18527	310.893	363.719	240.048	7976.79	9042.18	5139.74		44269.2	61033.5	45886.3	60927.1	41378.3	44647.3	407.694	363.719	334.383	7976.79	9421.7	9165.64		49690.3	368.599	8854.71		49690.3	1969.25	20224.3		SOD5	0.0396305	3.43192e-05	0.000116399	0.407008	0.00011695	0.00182962
SOD6		1058.09	244.52	1220.29	255.844	1130.76	619.039	82.8929	110.719	90.0478	338.789	230.179	183.737		1155.88	295.497	1220.29	283.922	1492.77	1491.79	108.703	110.719	125.435	338.789	239.84	327.657		990.025	114.952	302.095		990.025	614.136	689.992		SOD6	0.620324	0.0345944	0.010748	0.696944	0.0791736	0.117344
SOG2		115.094	227.52	111.292	217.844	140.765	60.0385	27.8929	47.7191	40.0478	156.789	56.1787	30.7375		125.731	274.953	111.292	241.751	185.83	144.684	36.5778	47.7191	55.7859	156.789	58.5367	54.8138		180.707	46.6943	90.0466		180.707	249.466	205.668		SOG2	1.3805	0.0116988	0.00462271	1.13813	0.0842796	0.122336
SSB1		1176.09	1355.52	1375.29	1445.84	814.765	331.039	285.893	274.719	248.048	1019.79	677.179	377.737		1284.79	1638.11	1375.29	1604.52	1075.61	797.752	374.91	274.719	345.527	1019.79	705.601	673.615		1296.01	331.718	799.668		1296.01	1772.22	1826.46		SSB1	1.36744	0.00156567	0.00110825	1.40929	0.0460544	0.084991
STF2		36762.1	10997.5	42001.3	12288.8	25707.8	16907	8106.89	11485.7	10045	19760.8	20164.2	10522.7		40159.6	13290.2	42001.3	13637.5	33937.9	40743.4	10631.1	11485.7	13992.6	19760.8	21010.5	18765.1		30628.3	12036.5	19845.5		30628.3	64305.2	45327.5		STF2	2.09953	0.0564275	0.0161732	1.47992	0.226358	0.230951
STP2		3321.09	2612.52	3716.29	2880.84	5152.76	2712.04	782.893	1112.72	702.048	2638.79	2543.18	1385.74		3628.02	3157.17	3716.29	3197	6802.39	6535.59	1026.66	1112.72	977.941	2638.79	2649.92	2471.17		4506.08	1039.11	2586.63		4506.08	5551.45	5907.91		STP2	1.23199	0.0110314	0.00444534	1.3111	0.0997093	0.137598
SUT1		236.094	196.52	204.292	211.844	236.765	91.0385	87.8929	101.719	115.048	278.789	231.179	47.7375		257.913	237.49	204.292	235.093	312.564	219.389	115.26	101.719	160.26	278.789	240.882	85.1297		244.457	125.746	201.6		244.457	671.803	460.459		SUT1	2.74815	0.00230802	0.00138142	1.8836	0.371946	0.335705
TEC1		10612.1	3236.52	11927.3	3676.84	14003.8	7019.04	255.893	357.719	337.048	1226.79	1192.18	806.737		11592.8	3911.25	11927.3	4080.36	18487	16914.8	335.569	357.719	469.502	1226.79	1242.22	1438.65		11152.3	387.597	1302.55		11152.3	2070.75	2975.05		TEC1	0.18568	0.0223369	0.00739115	0.266767	0.0319173	0.0696923
TPK1		109.094	119.52	150.292	150.844	373.765	126.039	28.8929	56.7191	32.0478	142.789	150.179	50.7375		119.176	144.437	150.292	167.398	493.423	303.733	37.8892	56.7191	44.6421	142.789	156.482	90.4796		229.743	46.4168	129.917		229.743	247.983	296.733		TPK1	1.07939	0.0719303	0.0195171	1.29158	0.291327	0.27904
TPK2		418.094	249.52	422.292	301.844	187.765	121.039	62.8929	90.7191	49.0478	202.789	233.179	32.7375		456.733	301.539	422.292	334.97	247.877	291.684	82.4756	90.7191	68.3228	202.789	242.966	58.3804		342.516	80.5058	168.045		342.516	430.105	383.819		TPK2	1.25572	0.00100705	0.000915783	1.12059	0.0237972	0.0587832
TPS2		6723.09	5434.52	7851.29	5929.84	5040.76	2397.04	1313.89	1898.72	1494.05	6394.79	6490.18	3273.74		7344.43	6567.48	7851.29	6580.62	6654.53	5776.49	1722.99	1898.72	2081.18	6394.79	6762.58	5838.02		6795.81	1900.97	6331.8		6795.81	10156	14462		TPS2	1.49445	9.62489e-06	4.89667e-05	2.12807	0.349981	0.322074
TRR1		440.094	656.52	578.292	732.844	538.765	154.039	49.8929	47.7191	38.0478	284.789	217.179	55.7375		480.766	793.389	578.292	813.27	711.247	371.209	65.4278	47.7191	53	284.789	226.294	99.396		624.696	55.3823	203.493		624.696	295.882	464.783		TRR1	0.473641	0.00106933	0.000915783	0.744015	0.0071657	0.0252233
TRX1		1046.09	1093.52	987.292	1272.84	1023.76	445.039	209.893	315.719	237.048	1775.79	1942.18	755.737		1142.77	1321.49	987.292	1412.53	1351.52	1072.47	275.246	315.719	330.204	1775.79	2023.7	1347.7		1214.68	307.056	1715.73		1214.68	1640.46	3918.76		TRX1	1.35053	4.83701e-05	0.000124334	3.22617	0.0188431	0.0500585
TTR1		755.094	550.52	813.292	640.844	361.765	176.039	142.893	151.719	103.048	874.789	792.179	267.737		824.878	665.29	813.292	711.174	477.581	424.226	187.385	151.719	143.544	874.789	825.428	477.453		652.74	160.883	725.89		652.74	859.52	1657.95		TTR1	1.31679	0.00181992	0.00121427	2.53998	0.590493	0.490407
TUP1		579.094	696.52	611.292	690.844	402.765	194.039	141.893	190.719	125.048	508.789	317.179	189.737		632.612	841.728	611.292	766.661	531.707	467.603	186.073	190.719	174.19	508.789	330.491	338.357		641.934	183.661	392.546		641.934	981.213	896.583		TUP1	1.52853	0.000961573	0.000910137	1.39669	0.0305892	0.0683644
TYE7		9360.09	4005.52	9856.29	4366.84	7906.76	3827.04	2303.89	3256.72	2105.05	6022.79	5954.18	3182.74		10225.1	4840.57	9856.29	4846.09	10438.1	9222.57	3021.24	3256.72	2932.3	6022.79	6204.09	5675.74		8238.12	3070.09	5967.54		8238.12	16402	13630		TYE7	1.99099	0.014129	0.0053743	1.6545	0.197318	0.222259
UCF1		56702.1	52377.5	61026.3	56435.8	70298.8	38733	19885.9	29800.7	20933	47137.8	50477.2	26945.7		61942.4	63296.9	61026.3	62629.4	92804.4	93340.6	26077.7	29800.7	29159.4	47137.8	52595.8	48052		72506.7	28345.9	49261.9		72506.7	151439	112515		UCF1	2.08862	0.00242936	0.00142994	1.55179	0.0459187	0.084991
UGA32		42.094	111.52	37.2919	131.844	61.7649	25.0385	16.8929	17.7191	18.0478	62.7892	50.1787	3.73748		45.9842	134.77	37.2919	146.313	81.5385	60.339	22.1528	17.7191	25.1403	62.7892	52.2848	6.66501		84.3727	21.6707	40.5797		84.3727	115.777	92.6849		UGA32	1.3722	0.057465	0.0163554	1.09852	0.185142	0.211935
UGP1		1717.09	1133.52	1891.29	1202.84	1217.76	497.039	308.893	417.719	296.048	1630.79	1199.18	457.737		1875.78	1369.83	1891.29	1334.85	1607.62	1197.79	405.071	417.719	412.39	1630.79	1249.51	816.278		1546.19	411.727	1232.19		1546.19	2199.66	2814.35		UGP1	1.42263	0.000339589	0.000431916	1.82018	0.219965	0.229416
UME6		470.094	385.52	429.292	397.844	500.765	213.039	13.8929	13.7191	8.04781	253.789	215.179	87.7375		513.539	465.892	429.292	441.505	661.081	513.39	18.2187	13.7191	11.2105	253.789	224.21	156.461		504.117	14.3828	211.487		504.117	76.8403	483.041		UME6	0.152426	2.64597e-05	9.7902e-05	0.958192	0.000984446	0.00729526
UPC2		247.094	470.52	283.292	507.844	771.765	313.039	54.8929	104.719	79.0478	340.789	240.179	83.7375		269.93	568.612	283.292	563.578	1018.84	754.374	71.9846	104.719	110.112	340.789	250.259	149.328		576.438	95.6053	246.792		576.438	510.774	563.679		UPC2	0.886088	0.0259425	0.00824891	0.977866	0.100657	0.137598
WH11		83155.1	10182.5	89730.3	10881.8	10146.8	17370	5751.89	5913.72	4679.05	7385.79	6736.18	3945.74		90840.1	12305.3	89730.3	12076.1	13395.2	41859.1	7542.83	5913.72	6517.84	7385.79	7018.91	7036.39		43367.7	6658.13	7147.03		43367.7	35571.2	16324		WH11	0.820225	0.150726	0.0360857	0.376409	0.155435	0.183909
YHB1		13174.1	5644.52	14172.3	6081.84	17031.8	5851.04	1423.89	1836.72	2962.05	2155.79	1368.18	827.737		14391.6	6821.26	14172.3	6749.3	22484.4	14100.1	1867.24	1836.72	4126.08	2155.79	1425.6	1476.09		13119.8	2610.02	1685.83		13119.8	13944.1	3850.47		YHB1	1.06283	0.0207516	0.00692286	0.293485	0.0138185	0.0413968
YWP1		2396.09	214.52	2646.29	257.844	385.765	314.039	4211.89	5767.72	4302.05	5494.79	5275.18	2786.74		2617.54	259.243	2646.29	286.141	509.265	756.784	5523.33	5767.72	5992.68	5494.79	5496.59	4969.56		1179.21	5761.24	5320.31		1179.21	30779.6	12151.7		YWP1	26.1019	0.000284634	0.00041373	10.305	0.000544179	0.00547289
ZAP1		203.094	791.52	233.292	928.844	204.765	58.0385	36.8929	50.7191	20.0478	198.789	177.179	46.7375		221.863	956.533	233.292	1030.78	270.319	139.864	48.3801	50.7191	27.9263	198.789	184.615	83.3464		475.442	42.3418	155.584		475.442	226.212	355.356		ZAP1	0.475794	0.116242	0.0288478	0.747423	0.229214	0.232182
ZCF20		214.094	442.52	209.292	496.844	214.765	90.0385	21.8929	23.7191	25.0478	127.789	62.1787	30.7375		233.88	534.775	209.292	551.37	283.52	216.979	28.7096	23.7191	34.8912	127.789	64.7885	54.8138		338.303	29.1066	82.4638		338.303	155.503	188.349		ZCF20	0.459656	0.0147149	0.00544453	0.556747	0.033873	0.0707624
ZCF3		150.094	114.52	149.292	118.844	182.765	84.0385	29.8929	37.7191	30.0478	229.789	129.179	47.7375		163.965	138.395	149.292	131.886	241.276	202.52	39.2005	37.7191	41.8561	229.789	134.601	85.1297		171.222	39.5919	149.84		171.222	211.521	342.237		ZCF3	1.23536	0.00128659	0.000958307	1.99879	0.587936	0.490407
ZCF31		81.094	206.52	94.2919	233.844	126.765	64.0385	1	1	1	110.789	87.1787	49.7375		88.5885	249.575	94.2919	259.507	167.348	154.323	1	1	1	110.789	90.8378	88.6963		168.939	1	96.7744		168.939	1	221.035		ZCF31	0.031624	0.00647684	0.00302689	1.30837	0.145892	0.179254
ZCF34		40.094	67.5205	33.2919	80.8437	28.7649	1	13.8929	9.71909	9.04781	44.7892	7.17874	9.73748		43.7994	81.5968	33.2919	89.716	37.9738	2.40985	18.2187	9.71909	12.6035	44.7892	7.48005	17.3647		48.1313	13.5137	23.2113		48.1313	72.1976	53.0152		ZCF34	1.50001	0.118993	0.0293515	1.10147	0.268866	0.264729
ZCF39		560.094	683.52	621.292	728.844	807.765	396.039	68.8929	82.7191	48.0478	600.789	494.179	245.737		611.857	826.017	621.292	808.831	1066.37	954.392	90.3437	82.7191	66.9298	600.789	514.92	438.221		814.792	79.9975	517.977		814.792	427.389	1183.07		ZCF39	0.524538	0.000245517	0.000384333	1.45199	0.0326382	0.0696923
ZCF7		10.094	19.5205	2.29192	19.8437	5.76489	1	1.89294	1	0.0478095	1	1	1		11.0268	23.59	2.29192	22.0215	7.61048	2.40985	2.48233	1	0.0665979	1	1	1		11.4918	1.18298	1		11.4918	6.32009	1		ZCF7	0.549966	0.109396	0.0273154	0.0870188	0.103336	0.138569
ZRT1		1367.09	18363.5	1464.29	20479.8	1250.76	910.039	132.893	111.719	56.0478	864.789	1364.18	580.737		1493.44	22191.9	1464.29	22727.4	1651.19	2193.05	174.271	111.719	78.0737	864.789	1421.44	1035.62		8620.21	121.355	1107.28		8620.21	648.341	2529.06		ZRT1	0.0752117	0.226454	0.0512037	0.293387	0.279515	0.2718
ZRT2		3436.09	14009.5	3815.29	15876.8	1877.76	901.039	702.893	1110.72	602.048	1194.79	1850.18	506.737		3753.65	16930.2	3815.29	17619.3	2478.92	2171.36	921.749	1110.72	838.643	1194.79	1927.83	903.659		7794.77	957.037	1342.09		7794.77	5113	3065.37		ZRT2	0.655952	0.164813	0.038774	0.39326	0.187036	0.212377
orf19.1424		85.094	175.52	113.292	209.844	78.7649	30.0385	31.8929	48.7191	38.0478	189.789	118.179	31.7375		92.9582	212.112	113.292	232.873	103.981	72.3882	41.8233	48.7191	53	189.789	123.139	56.5971		137.934	47.8474	123.175		137.934	255.626	281.334		orf19.1424	1.85325	0.0601418	0.0167656	2.03963	0.764624	0.60005
orf19.1534		730.094	3166.52	744.292	3451.84	887.765	370.039	129.893	177.719	94.0478	649.789	949.179	308.737		797.568	3826.66	744.292	3830.67	1171.98	891.736	170.337	177.719	131.007	649.789	989.017	550.568		1877.15	159.688	729.792		1877.15	853.136	1666.86		orf19.1534	0.454485	0.100369	0.0253729	0.887973	0.24862	0.248267
orf19.1691		65.094	138.52	41.2919	165.844	51.7649	1	168.893	242.719	156.048	2961.79	3709.18	1032.74		71.1098	167.399	41.2919	184.044	68.3371	2.40985	221.48	242.719	217.372	2961.79	3864.86	1841.67		89.0986	227.19	2889.44		89.0986	1213.77	6599.54		orf19.1691	13.6228	0.015065	0.00552385	74.0701	0.000167775	0.00236227
orf19.1862		1561.09	1370.52	1832.29	1435.84	828.765	765.039	466.893	612.719	462.048	2866.79	2505.18	1010.74		1705.37	1656.24	1832.29	1593.42	1094.09	1843.62	612.267	612.719	643.625	2866.79	2610.33	1802.44		1620.84	622.87	2426.52		1620.84	3327.7	5542.22		orf19.1862	2.05307	0.000518699	0.00057057	3.41935	0.019455	0.0507271
orf19.2125		2647.09	4152.52	2939.29	4546.84	2619.76	1426.04	688.893	1024.72	912.048	3715.79	3859.18	1418.74		2891.73	5018.22	2939.29	5045.84	3458.46	3436.53	903.39	1024.72	1270.47	3715.79	4021.16	2530.02		3798.35	1066.19	3422.32		3798.35	5696.16	7816.65		orf19.2125	1.49964	0.00245936	0.00142994	2.05791	0.586464	0.490407
orf19.3615		394.094	556.52	447.292	629.844	513.765	261.039	38.8929	49.7191	51.0478	514.789	809.179	168.737		430.515	672.541	447.292	698.967	678.243	629.063	51.0028	49.7191	71.1088	514.789	843.141	300.908		592.77	57.2769	552.946		592.77	306.003	1262.94		orf19.3615	0.516226	0.000154157	0.000285196	2.13057	0.761523	0.60005
orf19.409		5497.09	3150.52	5863.29	3411.84	5348.76	2837.04	1009.89	1532.72	1103.05	3275.79	2648.18	1325.74		6005.12	3807.33	5863.29	3786.28	7061.13	6836.82	1324.34	1532.72	1536.53	3275.79	2759.33	2364.17		5560	1464.53	2799.76		5560	7824.28	6394.72		orf19.409	1.40725	0.00209109	0.00130934	1.15013	0.0163506	0.0460434
orf19.411		319.094	403.52	374.292	451.844	572.765	230.039	143.893	183.719	94.0478	279.789	207.179	212.737		348.584	487.644	374.292	501.432	756.132	554.357	188.696	183.719	131.007	279.789	215.874	379.372		503.74	167.807	291.679		503.74	896.516	666.2		orf19.411	1.77972	0.00671325	0.00303588	1.32251	0.0564992	0.0958444
orf19.4174		165.094	289.52	190.292	302.844	321.765	128.039	13.8929	17.7191	12.0478	116.789	71.1787	38.7375		180.352	349.878	190.292	336.08	424.776	308.553	18.2187	17.7191	16.7824	116.789	74.1662	69.0801		298.322	17.5734	86.6785		298.322	93.8864	197.976		orf19.4174	0.314715	0.00173279	0.00117541	0.663631	0.00820678	0.0268724
orf19.449		6892.09	4189.52	8012.29	4451.84	6776.76	3306.04	1337.89	1924.72	1336.05	4596.79	5221.18	5067.74		7529.04	5062.93	8012.29	4940.42	8946.3	7967.04	1754.47	1924.72	1861.09	4596.79	5440.32	9037.24		7076.34	1846.76	6358.12		7076.34	9866.36	14522.1		orf19.449	1.39428	0.00121346	0.000958307	2.0522	0.608367	0.49786
orf19.4706		574.094	1127.52	606.292	1232.84	846.765	348.039	91.8929	134.719	59.0478	1021.79	1151.18	430.737		627.15	1362.58	606.292	1368.14	1117.85	838.719	120.505	134.719	82.2526	1021.79	1199.5	768.129		986.789	112.492	996.471		986.789	600.993	2275.96		orf19.4706	0.609039	0.00394375	0.00208455	2.30643	0.966525	0.723866
orf19.5517		149.094	20.5205	138.292	46.8437	78.7649	20.0385	10.8929	4.71909	4.04781	94.7892	34.1787	9.73748		162.873	24.7985	138.292	51.9847	103.981	48.2897	14.2846	4.71909	5.63853	94.7892	35.6133	17.3647		88.3698	8.21408	49.2557		88.3698	43.8839	112.501		orf19.5517	0.496595	0.0458515	0.0136216	1.27307	0.318031	0.296548
orf19.5626		5825.09	1096.52	6024.29	1207.84	3689.76	2371.04	839.893	1292.72	951.048	5039.79	4890.18	2236.74		6363.44	1325.12	6024.29	1340.4	4871.02	5713.84	1101.41	1292.72	1324.79	5039.79	5095.43	3988.75		4273.02	1239.64	4707.99		4273.02	6622.81	10753.1		orf19.5626	1.54991	0.0659672	0.0182644	2.51652	0.767109	0.60005
orf19.5848		124.094	211.52	138.292	247.844	234.765	115.039	47.8929	49.7191	46.0478	144.789	94.1787	35.7375		135.562	255.617	138.292	275.044	309.923	277.225	62.8051	49.7191	64.1438	144.789	98.1316	63.7302		231.944	58.8893	102.217		231.944	314.618	233.466		orf19.5848	1.35644	0.00654462	0.00302689	1.00656	0.0299014	0.0683644
orf19.6578		2718.09	1731.52	3036.29	1974.84	3716.76	2029.04	985.893	1323.72	876.048	3604.79	3828.18	2881.74		2969.29	2092.5	3036.29	2191.57	4906.66	4889.67	1292.86	1323.72	1220.32	3604.79	3988.85	5138.97		3347.67	1278.97	4244.2		3347.67	6832.92	9693.85		orf19.6578	2.0411	0.0288155	0.0090914	2.89571	0.306148	0.288562
orf19.6660		352.094	178.52	386.292	175.844	248.765	73.0385	73.8929	93.7191	51.0478	402.789	246.179	126.737		384.634	215.738	386.292	195.142	328.405	176.012	96.9006	93.7191	71.1088	402.789	256.511	226.01		281.037	87.2428	295.103		281.037	466.097	674.022		orf19.6660	1.65849	0.0124139	0.00485813	2.39834	0.841829	0.6407
orf19.670.2		20156.1	19107.5	22848.3	21019.8	18914.8	12845	8770.89	12491.7	8543.05	25331.8	17432.2	11303.7		22018.9	23091	22848.3	23326.7	24970.2	30954.6	11501.8	12491.7	11900.3	25331.8	18163.8	20157.8		24534.9	11964.6	21217.8		24534.9	63921.4	48462		orf19.670.2	2.60532	0.000380032	0.000454918	1.97522	0.21157	0.223328
ARP3		114.094	273.52	130.292	316.844	106.765	47.0385	40.8929	41.7191	16.0478	119.789	90.1787	22.7375		124.638	330.543	130.292	351.616	140.945	113.356	53.6255	41.7191	22.3543	119.789	93.9637	40.5475		198.565	39.233	84.7668		198.565	209.603	193.609		ARP3	1.05559	0.0479336	0.0141369	0.975042	0.138352	0.172388
CLN3		810.094	1304.52	860.292	1421.84	1048.76	564.039	301.893	367.719	236.048	2557.79	2259.18	984.737		884.961	1576.48	860.292	1577.89	1384.52	1359.25	395.892	367.719	328.811	2557.79	2354	1756.07		1273.9	364.14	2222.62		1273.9	1945.43	5076.51		CLN3	1.52715	0.00224981	0.00136878	3.98502	0.00672328	0.0242728
CMK2		183.094	504.52	189.292	557.844	149.765	86.0385	44.8929	52.7191	21.0478	202.789	161.179	25.7375		200.015	609.7	189.292	619.065	197.711	207.34	58.871	52.7191	29.3193	202.789	167.944	45.8974		337.187	46.9698	138.877		337.187	250.937	317.197		CMK2	0.744208	0.0584758	0.0165275	0.940716	0.176985	0.205946
YRA1		271.094	579.52	296.292	518.844	287.765	98.0385	336.893	367.719	331.048	277.789	173.179	75.7375		296.148	700.336	296.292	575.785	379.891	236.258	441.789	367.719	461.144	277.789	180.447	135.062		414.118	423.551	197.766		414.118	2262.83	451.702		YRA1	5.46422	0.934851	0.204562	1.09076	0.0975024	0.135924
orf19.3456		1.09399	39.5205	9.29192	22.8437	6.76489	1	6.89294	5.71909	1	1	1	1		1.19509	47.7595	9.29192	25.3508	8.93063	2.40985	9.03915	5.71909	1	1	1	1		15.823	5.25275	1		15.823	28.063	1		orf19.3456	1.77356	0.359554	0.0799663	0.0631993	0.207466	0.223328
Sum		832537	752583	909478	819537	688924	377401	129816	170236	122209	398197	382157	223294														Sum	909477	170233	398191
NF		1.09242	1.20848	1	1.10975	1.32014	2.40985	1.31136	1	1.39298	1	1.04197	1.78329														NF	1	5.34253	2.28402

## Sheet: RPMI+10%Serum-brg1nrg1
Probe Name		Counts after background subtraction										Normalize count - H			Normalize count - brg1			Normalize count-brg1ΔΔ+nrg1ΔΔ				Avg_Individual replicates				Normalize to WT-Avg				Probe name	brg1ΔΔ/WT			brg1ΔΔ nrg1ΔΔ/wt
		WT_H1	WT_H2	WT_H3	brg1ΔΔ	brg1ΔΔ	brg1ΔΔ	brg1ΔΔ nrg1ΔΔ	brg1ΔΔ nrg1ΔΔ	brg1ΔΔ nrg1ΔΔ		WT_H1	WT_H2	WT_H3	brg1ΔΔ	brg1ΔΔ	brg1ΔΔ	brg1ΔΔ nrg1ΔΔ	brg1ΔΔ nrg1ΔΔ	brg1ΔΔ nrg1ΔΔ		Avg_WT	Avg_brg1ΔΔ	Avg_brg1ΔΔ nrg1ΔΔ		WT	brg1ΔΔ	brg1ΔΔ nrg1ΔΔ			FC	T-test	FDR	FC	T-test	FDR
ACE2		261.562	241.277	209.498	207.885	231.173	242.284	129.844	88.2756	83.6826		289.071	248.485	209.498	231.972	248.234	242.284	129.844	108.227	118.89		249.018	240.83	118.987		249.018	245.644	136.868		ACE2	0.986452	0.744663	0.0424085	0.54963	0.00546175	0.00244767
ACS1		19954.6	21972.3	19044.5	20738.9	17998.2	31514.3	4674.84	3410.28	4393.68		22053.2	22628.6	19044.5	23141.9	19326.4	31514.3	4674.84	4181.04	6242.23		21242.1	24660.9	5032.71		21242.1	25153.8	5788.99		ACS1	1.18415	0.415449	0.00271344	0.272524	0.000219284	0.000221111
ACS2		2689.56	2871.28	2835.5	3671.88	3684.17	3597.28	10492.8	9675.28	7211.68		2972.42	2957.05	2835.5	4097.34	3956.06	3597.28	10492.8	11862	10245.8		2921.66	3883.56	10866.9		2921.66	3961.19	12499.9		ACS2	1.3558	0.00343054	0.00150391	4.27836	9.49697e-05	0.00013133
ADH5		15924.6	17451.3	21201.5	11088.9	9887.17	11418.3	13384.8	10086.3	13597.7		17599.3	17972.6	21201.5	12373.7	10616.8	11418.3	13384.8	12365.9	19318.6		18924.5	11469.6	15023.1		18924.5	11698.9	17280.7		ADH5	0.618188	0.00398424	0.00899342	0.91314	0.18665	0.0564615
AHR1		711.562	709.277	538.498	549.885	699.173	540.284	1504.84	1176.28	1310.68		786.397	730.465	538.498	613.599	750.771	540.284	1504.84	1442.13	1862.12		685.12	634.885	1603.03		685.12	647.576	1843.93		AHR1	0.945201	0.632415	0.18422	2.69139	0.00368421	0.00178316
ALS1		11885.6	12346.3	15774.5	12479.9	14680.2	13285.3	4813.84	2752.28	1526.68		13135.6	12715.1	15774.5	13925.9	15763.6	13285.3	4813.84	3374.32	2169		13875.1	14324.9	3452.39		13875.1	14611.3	3971.19		ALS1	1.05306	0.729277	0.0688662	0.286211	0.00104739	0.000679687
ALS2		78.5622	93.277	125.498	159.885	167.173	174.284	124.844	81.2756	34.6826		86.8246	96.0634	125.498	178.41	179.511	174.284	124.844	99.6449	49.2745		102.795	177.402	91.2544		102.795	180.948	104.968		ALS2	1.76027	0.00317023	0.0663153	1.02113	0.669413	0.179022
ALS3		25020.6	25896.3	20372.5	3432.88	3656.17	4272.28	61402.8	57718.3	32869.7		27652	26669.9	20372.5	3830.65	3925.99	4272.28	61402.8	70763.3	46698.9		24898.1	4009.64	59621.7		24898.1	4089.79	68581.3		ALS3	0.164261	0.000793937	0.00197859	2.75448	0.00921033	0.00371483
ALS4		365.562	369.277	260.498	845.885	914.173	847.284	458.844	397.276	242.683		404.008	380.308	260.498	943.896	981.638	847.284	458.844	487.065	344.786		348.271	924.273	430.232		348.271	942.749	494.884		ALS4	2.70694	0.000648727	0.00271344	1.42097	0.257783	0.0742662
ALS5		137.562	175.277	121.498	202.885	214.173	162.284	205.844	156.276	94.6826		152.03	180.513	121.498	226.393	229.979	162.284	205.844	191.596	134.518		151.347	206.219	177.319		151.347	210.341	203.966		ALS5	1.38979	0.119847	0.0246013	1.34767	0.400946	0.112824
ALS6		5.56224	18.277	1	1	1	1	1	1	1		6.14722	18.823	1	1	1	1	1	1	1		8.65674	1	1		8.65674	1	1		ALS6	0.117826	0.221761	0.150925	0.115517	0.221761	0.0662546
ALS7		501.562	486.277	528.498	586.885	620.173	596.284	468.844	331.276	346.683		554.312	500.803	528.498	654.886	665.941	596.284	468.844	406.148	492.542		527.871	639.037	455.845		527.871	651.811	524.346		ALS7	1.23479	0.0138703	0.118325	0.993323	0.0746007	0.0247306
ALS9		45.5622	50.277	1	109.885	83.1734	73.2839	208.844	159.276	130.683		50.354	51.7789	1	122.617	89.3115	73.2839	208.844	195.274	185.664		34.3776	95.0707	196.594		34.3776	96.9712	226.137		ALS9	2.82076	0.0517764	0.0827944	6.57802	0.000838993	0.000580104
AOX2		1981.56	2145.28	2303.5	2272.88	2491.17	2727.28	1	1	1		2189.96	2209.36	2303.5	2536.24	2675.02	2727.28	1	1	1		2234.27	2646.18	1		2234.27	2699.08	1		AOX2	1.20803	0.00353553	0.000106162	0.000447573	3.63923e-07	8.80694e-06
ARG1		438.562	464.277	484.498	448.885	481.173	194.284	234.844	149.276	121.683		484.686	478.146	484.498	500.896	516.683	194.284	234.844	183.014	172.878		482.443	403.954	196.912		482.443	412.029	226.502		ARG1	0.854048	0.496136	0.000106162	0.46949	0.000121778	0.00015113
ARG81		192.562	215.277	172.498	293.885	298.173	301.284	183.844	158.276	138.683		212.814	221.708	172.498	327.937	320.178	301.284	183.844	194.048	197.03		202.34	316.466	191.641		202.34	322.792	220.439		ARG81	1.5953	0.00261065	0.0593313	1.08945	0.531941	0.147314
BCR1		702.562	731.277	720.498	782.885	822.173	706.284	787.844	588.276	512.683		776.451	753.122	720.498	873.596	882.849	706.284	787.844	721.233	728.383		750.023	820.91	745.82		750.023	837.319	857.897		BCR1	1.11639	0.300249	0.200455	1.14383	0.882219	0.228339
BRG1		2178.56	2446.28	3135.5	1.88472	14.1734	1	1	1	1		2407.68	2519.35	3135.5	2.10309	15.2194	1	1	1	1		2687.51	6.10749	1		2687.51	6.22957	1		BRG1	0.00231797	0.000290703	0.0205154	0.000372092	0.00028832	0.000250709
CAP1		717.562	807.277	657.498	1043.88	1209.17	997.284	960.844	808.276	745.683		793.028	831.392	657.498	1164.84	1298.41	997.284	960.844	990.956	1059.41		760.639	1153.51	1003.74		760.639	1176.57	1154.57		CAP1	1.54682	0.0181803	0.0934104	1.5179	0.0156899	0.00597945
CAT1		1815.56	1965.28	1782.5	867.885	760.173	1422.28	520.844	407.276	357.683		2006.5	2023.98	1782.5	968.445	816.273	1422.28	520.844	499.325	508.17		1937.66	1069	509.446		1937.66	1090.37	586.002		CAT1	0.562724	0.0117943	0.0512326	0.302428	5.23231e-05	9.26257e-05
CDC10		163.562	202.277	143.498	193.885	214.173	205.284	3483.84	2813.28	2440.68		180.764	208.319	143.498	216.35	229.979	205.284	3483.84	3449.11	3467.55		177.527	217.204	3466.83		177.527	221.546	3987.81		CDC10	1.24796	0.119545	0.108936	22.4631	1.05351e-08	5.09899e-07
CDR1		3178.56	3347.28	3967.5	5938.88	6578.17	5772.28	2125.84	2088.28	1177.68		3512.85	3447.27	3967.5	6627.01	7063.63	5772.28	2125.84	2560.25	1673.17		3642.54	6487.64	2119.75		3642.54	6617.33	2438.3		CDR1	1.81668	0.00232774	0.312279	0.669395	0.00743181	0.00312782
CDR2		24.5622	24.277	1	14.8847	5.17339	2.28386	1	1	1		27.1455	25.0022	1	16.6094	5.55518	2.28386	1	1	1		17.7159	8.14947	1		17.7159	8.31238	1		CDR2	0.469205	0.36797	0.338913	0.0564465	0.116843	0.0369638
CHT2		2718.56	2843.28	3098.5	1646.88	2039.17	2236.28	14422.8	7773.28	8314.68		3004.47	2928.21	3098.5	1837.71	2189.66	2236.28	14422.8	9530.13	11812.9		3010.39	2087.88	11922		3010.39	2129.62	13713.5		CHT2	0.707422	0.0024059	0.00103817	4.55539	0.00324263	0.00160146
CHT3		772.562	939.277	650.498	1989.88	2026.17	2261.28	145.844	147.276	47.6826		853.813	967.335	650.498	2220.45	2175.7	2261.28	145.844	180.562	67.744		823.882	2219.15	131.383		823.882	2263.51	151.127		CHT3	2.74737	0.000129887	0.0350249	0.183432	0.00215682	0.00113468
CIT1		16859.6	17534.3	19110.5	28647.9	24995.2	47037.3	2676.84	1693.28	1214.68		18632.7	18058.1	19110.5	31967.3	26839.8	47037.3	2676.84	2075.98	1725.73		18600.4	35281.4	2159.52		18600.4	35986.7	2484.04		CIT1	1.93473	0.0514517	0.000106162	0.133547	2.35477e-06	1.55436e-05
CPH1		304.562	319.277	409.498	196.885	245.173	238.284	668.844	524.276	467.683		336.593	328.815	409.498	219.697	263.267	238.284	668.844	642.768	664.45		358.302	240.416	658.687		358.302	245.222	757.671		CPH1	0.684401	0.01464	0.00428702	2.11462	0.000367704	0.000291752
CPH2		1358.56	1387.28	1337.5	1592.88	1763.17	1535.28	898.844	772.276	696.683		1501.44	1428.72	1337.5	1777.45	1893.29	1535.28	898.844	946.82	989.797		1422.55	1735.34	945.153		1422.55	1770.03	1087.18		CPH2	1.24426	0.0538278	0.0409333	0.764249	0.000917679	0.000625573
CRH11		1167.56	1266.28	1084.5	1409.88	1465.17	1401.28	249.844	185.276	133.683		1290.35	1304.1	1084.5	1573.25	1573.3	1401.28	249.844	227.15	189.927		1226.32	1515.94	222.307		1226.32	1546.25	255.714		CRH11	1.26089	0.0337551	0.0144423	0.208521	0.000163135	0.000181243
CSA1		9499.56	9951.28	11636.5	24536.9	28066.2	28625.3	11764.8	8816.28	6899.68		10498.6	10248.5	11636.5	27379.9	30137.4	28625.3	11764.8	10808.9	9802.58		10794.6	28714.2	10792.1		10794.6	29288.2	12413.9		CSA1	2.71324	3.8287e-05	0.217686	1.15001	0.997397	0.256777
CSH1		1233.56	1382.28	1399.5	2631.88	3313.17	2648.28	5651.84	3543.28	3551.68		1363.3	1423.57	1399.5	2936.84	3557.68	2648.28	5651.84	4344.1	5045.98		1395.45	3047.6	5013.97		1395.45	3108.52	5767.44		CSH1	2.22761	0.00355703	0.00269589	4.13302	0.000667091	0.000481899
DAK2		1037.56	1215.28	1145.5	1666.88	1701.17	1786.28	2681.84	2736.28	2107.68		1146.68	1251.58	1145.5	1860.02	1826.72	1786.28	2681.84	3354.71	2994.44		1181.25	1824.34	3010.33		1181.25	1860.81	3462.71		DAK2	1.57528	9.76495e-05	0.0178459	2.93138	0.000756734	0.000530811
DDR48		10279.6	11521.3	8854.5	4316.88	5695.17	7784.28	13302.8	7690.28	11037.7		11360.7	11865.4	8854.5	4817.07	6115.47	7784.28	13302.8	9428.37	15681.6		10693.5	6238.94	12804.3		10693.5	6363.66	14728.4		DDR48	0.595094	0.0245165	0.0239436	1.37732	0.3606	0.102065
DFG5		521.562	584.277	425.498	613.885	723.173	794.284	490.844	323.276	254.683		576.415	601.731	425.498	685.015	776.543	794.284	490.844	396.34	361.835		534.548	751.947	416.34		534.548	766.978	478.904		DFG5	1.43482	0.02816	0.0934104	0.895906	0.153299	0.0475621
ECE1		58600.6	62013.3	60486.5	1055.88	1176.17	1128.28	35389.8	31106.3	28914.7		64763.6	63865.8	60486.5	1178.23	1262.97	1128.28	35389.8	38136.7	41079.9		63038.6	1189.83	38202.1		63038.6	1213.61	43942.9		ECE1	0.0192519	1.17741e-06	0.000105044	0.697079	0.000290596	0.000250709
ECM331		1054.56	1166.28	822.498	177.885	277.173	207.284	793.844	457.276	743.683		1165.47	1201.12	822.498	198.496	297.628	207.284	793.844	560.626	1056.57		1063.03	234.469	803.68		1063.03	239.156	924.452		ECM331	0.224977	0.00267078	0.00271344	0.86964	0.238435	0.0703673
EFG1		1646.56	1753.28	2407.5	2211.88	2352.17	2496.28	1444.84	1096.28	1051.68		1819.73	1805.65	2407.5	2468.17	2525.76	2496.28	1444.84	1344.05	1494.16		2010.96	2496.74	1427.68		2010.96	2546.65	1642.23		EFG1	1.26638	0.0711298	0.261434	0.816637	0.0454286	0.0156896
ELF1		1057.56	1059.28	1230.5	1095.88	1086.17	840.284	1166.84	1058.28	502.683		1168.79	1090.92	1230.5	1222.86	1166.33	840.284	1166.84	1297.46	714.176		1163.4	1076.49	1059.49		1163.4	1098.01	1218.71		ELF1	0.943794	0.527909	0.00173925	1.04754	0.597204	0.162386
ENA2		2798.56	2755.28	3196.5	2889.88	3030.17	2975.28	450.844	355.276	300.683		3092.89	2837.58	3196.5	3224.73	3253.8	2975.28	450.844	435.572	427.188		3042.32	3151.27	437.868		3042.32	3214.26	503.668		ENA2	1.05652	0.475543	0.300261	0.165554	1.68235e-05	4.01612e-05
ENA21		6191.56	6624.28	6962.5	8470.88	9856.17	8168.28	3076.84	2467.28	1003.68		6842.73	6822.16	6962.5	9452.39	10583.5	8168.28	3076.84	3024.91	1425.96		6875.8	9401.41	2509.24		6875.8	9589.34	2886.31		ENA21	1.39465	0.0224995	0.211355	0.419778	0.00130363	0.000799785
FAV2		176.562	193.277	182.498	42.8847	47.1734	29.2839	223.844	138.276	107.683		195.131	199.051	182.498	47.8537	50.6547	29.2839	223.844	169.528	152.988		192.226	42.5974	182.12		192.226	43.4489	209.487		FAV2	0.22603	5.73028e-05	0.0155714	1.0898	0.669482	0.179022
FBP1		6480.56	7211.28	9464.5	14032.9	16110.2	9576.28	3011.84	2030.28	2508.68		7162.12	7426.69	9464.5	15658.9	17299.1	9576.28	3011.84	2489.14	3564.16		8017.77	14178.1	3021.71		8017.77	14461.5	3475.8		FBP1	1.80368	0.0664068	0.300261	0.433512	0.00321149	0.00160146
FDH1		3535.56	3828.28	3677.5	5461.88	8707.17	17774.3	369.844	67.2756	221.683		3907.4	3942.64	3677.5	6094.74	9349.75	17774.3	369.844	82.4807	314.951		3842.51	11072.9	255.758		3842.51	11294.3	294.192		FDH1	2.93929	0.106365	0.0311946	0.0765625	7.74114e-06	2.60275e-05
FGR15		177.562	225.277	209.498	239.885	257.173	278.284	212.844	162.276	172.683		196.236	232.007	209.498	267.68	276.152	278.284	212.844	198.952	245.335		212.58	274.039	219.044		212.58	279.517	251.96		FGR15	1.31488	0.00492057	0.161768	1.18525	0.727052	0.193326
FKH2		149.562	165.277	174.498	244.885	230.173	208.284	228.844	174.276	166.683		165.292	170.214	174.498	273.259	247.16	208.284	228.844	213.664	236.811		170.001	242.901	226.44		170.001	247.756	260.467		FKH2	1.45738	0.0187137	0.00271344	1.53215	0.00150064	0.000885745
FRP1		3956.56	4152.28	5663.5	5601.88	5764.17	6745.28	1048.84	919.276	693.683		4372.67	4276.31	5663.5	6250.97	6189.56	6745.28	1048.84	1127.04	985.535		4770.83	6395.27	1053.81		4770.83	6523.11	1212.17		FRP1	1.36729	0.027776	0.15708	0.254079	0.00116279	0.000740516
FRP2		7071.56	7331.28	7562.5	8730.88	8842.17	9623.28	2573.84	2103.28	1525.68		7815.28	7550.28	7562.5	9742.52	9494.71	9623.28	2573.84	2578.64	2167.58		7642.68	9620.17	2440.02		7642.68	9812.48	2806.69		FRP2	1.2839	6.07781e-05	0.0949156	0.367239	5.50813e-06	2.42358e-05
FRP3		6535.56	7452.28	8470.5	5833.88	5463.17	10860.3	1457.84	1061.28	1446.68		7222.91	7674.89	8470.5	6509.85	5866.35	10860.3	1457.84	1301.14	2055.34		7789.43	7745.49	1604.77		7789.43	7900.32	1845.93		FRP3	1.01424	0.979538	0.00269589	0.236979	0.000137082	0.000165869
FTR1		5267.56	5503.28	7165.5	10647.9	11271.2	7413.28	13101.8	11232.3	8537.68		5821.55	5667.67	7165.5	11881.6	12103	7413.28	13101.8	13770.9	12129.7		6218.24	10466	13000.8		6218.24	10675.2	14954.5		FTR1	1.71675	0.0566983	0.118952	2.40494	0.000546192	0.000400541
GAL1		1927.56	2074.28	1791.5	3577.88	3694.17	3732.28	2568.84	1548.28	2505.68		2130.28	2136.24	1791.5	3992.45	3966.8	3732.28	2568.84	1898.21	3559.89		2019.34	3897.18	2675.65		2019.34	3975.08	3077.73		GAL1	1.9685	0.000182894	0.10102	1.52412	0.25627	0.0742662
GAL4		1035.56	1124.28	1141.5	876.885	958.173	1248.28	2772.84	2711.28	2260.68		1144.47	1157.86	1141.5	978.488	1028.89	1248.28	2772.84	3324.06	3211.82		1147.94	1085.22	3102.91		1147.94	1106.91	3569.19		GAL4	0.964256	0.491747	0.00397933	3.1092	0.000313576	0.000257239
GAP2		1760.56	2072.28	1936.5	3432.88	4241.17	6028.28	1	1	1		1945.72	2134.18	1936.5	3830.65	4554.17	6028.28	1	1	1		2005.47	4804.37	1		2005.47	4900.4	1		GAP2	2.44352	0.0125739	0.00134143	0.000498637	6.35398e-06	2.56277e-05
GCA2		443.562	461.277	299.498	269.885	293.173	391.284	476.844	226.276	689.683		490.212	475.056	299.498	301.156	314.809	391.284	476.844	277.417	979.852		421.589	335.75	578.037		421.589	342.461	664.901		GCA2	0.812311	0.271316	0.190413	1.57713	0.512229	0.143306
GCN4		1726.56	1743.28	1281.5	4766.88	5460.17	4283.28	3151.84	2675.28	1904.68		1908.14	1795.35	1281.5	5319.22	5863.13	4283.28	3151.84	3279.92	2706.04		1661.66	5155.21	3045.93		1661.66	5258.26	3503.66		GCN4	3.16445	0.00223901	0.261434	2.10852	0.0059638	0.0025544
GIS2		2792.56	2882.28	3020.5	3772.88	3666.17	4017.28	4131.84	3460.28	2052.68		3086.26	2968.38	3020.5	4210.04	3936.73	4017.28	4131.84	4242.34	2916.3		3025.04	4054.69	3763.5		3025.04	4135.74	4329.05		GIS2	1.36717	0.000304643	0.0217292	1.43107	0.158164	0.0487588
GNP1		6656.56	7244.28	9139.5	4831.88	4543.17	4930.28	2483.84	1896.28	2116.68		7356.63	7460.68	9139.5	5391.75	4878.45	4930.28	2483.84	2324.86	3007.23		7985.6	5066.83	2605.31		7985.6	5168.11	2996.82		GNP1	0.647179	0.00826726	0.0363909	0.375278	0.000931496	0.000626172
GPD2		7142.56	7414.28	9552.5	6694.88	6388.17	6210.28	2029.84	2112.28	1112.68		7893.75	7635.76	9552.5	7470.61	6859.61	6210.28	2029.84	2589.68	1580.82		8360.67	6846.84	2066.78		8360.67	6983.7	2377.36		GPD2	0.835304	0.0973384	0.00306982	0.284351	0.000706138	0.000502604
HAC1		1576.56	1683.28	1706.5	1406.88	1498.17	1352.28	1684.84	1464.28	1173.68		1742.37	1733.56	1706.5	1569.9	1608.74	1352.28	1684.84	1795.22	1667.48		1727.48	1510.31	1715.85		1727.48	1540.5	1973.7		HAC1	0.891762	0.0542751	0.0103296	1.14253	0.792921	0.207445
HAP2		1074.56	1095.28	1277.5	1193.88	1315.17	1277.28	377.844	322.276	285.683		1187.57	1128	1277.5	1332.22	1412.23	1277.28	377.844	395.114	405.877		1197.69	1340.58	392.945		1197.69	1367.38	451.994		HAP2	1.14168	0.0710391	0.00103817	0.377389	5.35851e-05	9.26257e-05
HAP3		185.562	138.277	231.498	579.885	755.173	596.284	109.844	63.2756	69.6826		205.078	142.408	231.498	647.075	810.904	596.284	109.844	77.5767	99		192.994	684.754	95.4735		192.994	698.442	109.821		HAP3	3.61898	0.00215571	0.0512326	0.569036	0.0254792	0.00927215
HAP43		1193.56	1317.28	1444.5	1715.88	1836.17	1780.28	1216.84	875.276	900.683		1319.09	1356.63	1444.5	1914.7	1971.68	1780.28	1216.84	1073.1	1279.63		1373.4	1888.89	1189.86		1373.4	1926.65	1368.66		HAP43	1.40283	0.00160815	0.447256	0.996545	0.062255	0.0209246
HEM1		391.562	385.277	377.498	343.885	291.173	292.284	686.844	747.276	518.683		432.743	396.786	377.498	383.73	312.662	292.284	686.844	916.169	736.907		402.342	329.559	779.973		402.342	336.146	897.183		HEM1	0.835474	0.0859622	0.00277247	2.2299	0.00615499	0.00261317
HGT7		4365.56	4558.28	3357.5	12965.9	12184.2	13169.3	57499.8	54155.3	36680.7		4824.69	4694.44	3357.5	14468.2	13083.3	13169.3	57499.8	66395.1	52113.3		4292.21	13573.6	58669.4		4292.21	13844.9	67485.9		HGT7	3.2256	0.000138447	0.0188772	15.7229	0.000203466	0.000209527
HOG1		1086.56	1278.28	1244.5	1394.88	1446.17	1726.28	1885.84	1387.28	1090.68		1200.84	1316.46	1244.5	1556.51	1552.9	1726.28	1885.84	1700.82	1549.56		1253.93	1611.9	1712.08		1253.93	1644.12	1969.35		HOG1	1.31117	0.00572534	0.0682883	1.57054	0.0112327	0.00438437
HSP104		1900.56	2106.28	2849.5	2195.88	2155.17	2469.28	3380.84	2473.28	2341.68		2100.44	2169.2	2849.5	2450.32	2314.22	2469.28	3380.84	3032.27	3326.9		2373.05	2411.27	3246.67		2373.05	2459.48	3734.56		HSP104	1.03642	0.883085	0.159094	1.57374	0.0291404	0.0104474
HSP70		6626.56	7344.28	10138.5	4540.88	4253.17	6177.28	12419.8	8354.28	9260.68		7323.48	7563.67	10138.5	5067.03	4567.05	6177.28	12419.8	10242.4	13156.9		8341.88	5270.46	11939.7		8341.88	5375.81	13734		HSP70	0.644436	0.0393788	0.274463	1.64639	0.0457073	0.0156896
HTA1		8586.56	9399.28	7443.5	5287.88	6738.17	5886.28	11019.8	9061.28	7550.68		9489.61	9680.05	7443.5	5900.58	7235.44	5886.28	11019.8	11109.2	10727.5		8871.05	6340.77	10952.2		8871.05	6467.52	12598		HTA1	0.729059	0.0400464	0.00324299	1.42013	0.0454655	0.0156896
HTA2		4982.56	5487.28	4353.5	2692.88	3305.17	2924.28	6917.84	5400.28	4774.68		5506.58	5651.19	4353.5	3004.9	3549.09	2924.28	6917.84	6620.81	6783.53		5170.42	3159.43	6774.06		5170.42	3222.58	7792.02		HTA2	0.623272	0.0115187	0.00306982	1.50704	0.0187308	0.00703719
HWP1		37835.6	38984.3	31967.5	449.885	378.173	471.284	26476.8	22676.3	20587.7		41814.7	40148.8	31967.5	502.012	406.082	471.284	26476.8	27801.4	29249.5		37977	459.793	27842.6		37977	468.984	32026.6		HWP1	0.0123491	0.000248713	0.00106029	0.843315	0.0322564	0.0113957
HYR1		1312.56	1430.28	1637.5	35.8847	63.1734	38.2839	849.844	345.276	637.683		1450.6	1473	1637.5	40.0426	67.8355	38.2839	849.844	423.312	905.974		1520.37	48.7207	726.377		1520.37	49.6946	835.532		HYR1	0.0326859	1.60648e-05	0.000134644	0.549559	0.00828231	0.00339715
IFD6		238.562	270.277	188.498	110.885	186.173	27.2839	129.844	97.2756	83.6826		263.652	278.351	188.498	123.733	199.913	27.2839	129.844	119.261	118.89		243.5	116.976	122.665		243.5	119.315	141.098		IFD6	0.489999	0.0913341	0.0109567	0.579459	0.0125788	0.0048705
IHD1		9368.56	10248.3	11705.5	2669.88	3256.17	2813.28	11320.8	9267.28	9639.68		10353.9	10554.4	11705.5	2979.24	3496.47	2813.28	11320.8	11361.8	13695.4		10871.3	3096.33	12126		10871.3	3158.23	13948.2		IHD1	0.290512	7.73467e-05	0.00252324	1.28304	0.231666	0.0687892
INO4		296.562	299.277	292.498	397.885	480.173	532.284	159.844	83.2756	117.683		327.752	308.217	292.498	443.987	515.61	532.284	159.844	102.097	167.195		309.489	497.293	143.045		309.489	507.234	164.541		INO4	1.63894	0.00290759	0.0185317	0.531655	0.00192566	0.00105911
IRE1		244.562	286.277	192.498	317.885	349.173	374.284	538.844	394.276	386.683		270.283	294.829	192.498	354.717	374.942	374.284	538.844	483.387	549.371		252.536	367.981	523.867		252.536	375.337	602.591		IRE1	1.48627	0.021597	0.18435	2.38615	0.0018438	0.00104988
IRO1		746.562	802.277	994.498	582.885	567.173	748.284	1646.84	1189.28	991.683		825.078	826.243	994.498	650.423	609.03	748.284	1646.84	1458.07	1408.91		881.94	669.245	1504.61		881.94	682.623	1730.71		IRO1	0.774003	0.0381322	0.191538	1.96239	0.00246594	0.00128335
KIP4		998.562	973.277	1143.5	182.885	225.173	232.284	2969.84	2306.28	2085.68		1103.58	1002.35	1143.5	204.075	241.791	232.284	2969.84	2827.52	2963.19		1083.14	226.05	2920.19		1083.14	230.569	3359.01		KIP4	0.21287	3.91615e-05	0.000347148	3.10117	8.01239e-06	2.60275e-05
KRE1		1103.56	1153.28	1033.5	565.885	659.173	469.284	1696.84	1264.28	780.683		1219.62	1187.73	1033.5	631.453	707.819	469.284	1696.84	1550.02	1109.14		1146.95	602.852	1452		1146.95	614.903	1670.2		KRE1	0.53612	0.00390449	0.00188387	1.45621	0.175805	0.0535154
MAC1		120.562	123.277	108.498	89.8847	123.173	115.284	441.844	237.276	248.683		133.242	126.96	108.498	100.3	132.263	115.284	441.844	290.903	353.31		122.9	115.949	362.019		122.9	118.267	416.421		MAC1	0.962303	0.588972	0.233319	3.3883	0.00575425	0.00248666
MAE1		612.562	678.277	794.498	1261.88	1297.17	1171.28	3455.84	2999.28	2481.68		676.985	698.539	794.498	1408.1	1392.9	1171.28	3455.84	3677.15	3525.8		723.341	1324.09	3552.93		723.341	1350.56	4086.84		MAE1	1.86712	0.00207972	0.0978602	5.64996	2.89033e-06	1.55436e-05
MBF1		3789.56	4302.28	4435.5	6135.88	6422.17	6625.28	12231.8	10368.3	8611.68		4188.11	4430.8	4435.5	6846.84	6896.12	6625.28	12231.8	12711.6	12234.9		4351.47	6789.41	12392.8		4351.47	6925.13	14255.1		MBF1	1.59145	3.09881e-05	0.137223	3.27593	1.47292e-06	1.42579e-05
MDM34		2819.56	3280.28	3006.5	3200.88	3385.17	2587.28	677.844	444.276	536.683		3116.1	3378.27	3006.5	3571.77	3634.99	2587.28	677.844	544.687	762.48		3166.95	3264.68	661.671		3166.95	3329.94	761.102		MDM34	1.05147	0.797651	0.171155	0.240326	3.92091e-05	7.59088e-05
MET28		1122.56	1142.28	1064.5	2571.88	3150.17	2323.28	2501.84	2266.28	2055.68		1240.62	1176.4	1064.5	2869.88	3382.65	2323.28	2501.84	2778.48	2920.57		1160.51	2858.61	2733.63		1160.51	2915.75	3144.42		MET28	2.51248	0.00541695	0.00190416	2.70953	0.000294831	0.000250709
NDT80		1060.56	1138.28	1262.5	1253.88	1227.17	1121.28	1043.84	896.276	484.683		1172.1	1172.28	1262.5	1399.17	1317.74	1121.28	1043.84	1098.85	688.602		1202.29	1279.4	943.764		1202.29	1304.97	1085.59		NDT80	1.0854	0.429429	0.00134143	0.90293	0.121843	0.0382936
NPR1		285.562	327.277	299.498	470.885	504.173	470.284	432.844	349.276	393.683		315.595	337.054	299.498	525.445	541.381	470.284	432.844	428.216	559.316		317.382	512.37	473.459		317.382	522.612	544.607		NPR1	1.64663	0.00127448	0.153548	1.71594	0.02439	0.00894299
NRG1		1273.56	1326.28	1184.5	4050.88	4706.17	3542.28	1	1	1		1407.5	1365.9	1184.5	4520.25	5053.48	3542.28	1	1	1		1319.3	4372.01	1		1319.3	4459.4	1		NRG1	3.38013	0.00241961	0.00444074	0.000757978	4.28683e-05	7.9801e-05
PCK1		21033.6	23655.3	24151.5	31929.9	36437.2	18046.3	5640.84	3863.28	4018.68		23245.7	24361.9	24151.5	35629.5	39126.2	18046.3	5640.84	4736.42	5709.46		23919.7	30934	5362.24		23919.7	31552.4	6168.04		PCK1	1.3191	0.34332	0.0897341	0.257865	2.34129e-06	1.55436e-05
PES1		125.562	131.277	176.498	63.8847	58.1734	64.2839	98.8438	134.276	17.6826		138.768	135.199	176.498	71.2869	62.4665	64.2839	98.8438	164.624	25.1221		150.155	66.0124	96.1965		150.155	67.332	110.652		PES1	0.448418	0.00335954	0.00306982	0.736923	0.272132	0.077936
PFK2		1211.56	1310.28	1171.5	1627.88	1594.17	2282.28	6854.84	6658.28	4650.68		1338.98	1349.42	1171.5	1816.5	1711.82	2282.28	6854.84	8163.13	6607.36		1286.63	1936.87	7208.44		1286.63	1975.59	8291.68		PFK2	1.53547	0.0243819	0.00313786	6.44448	0.000260579	0.000250709
PGA13		333.562	347.277	343.498	150.885	173.173	163.284	1747.84	1299.28	1115.68		368.643	357.651	343.498	168.367	185.953	163.284	1747.84	1592.93	1585.08		356.597	172.535	1641.95		356.597	175.984	1888.69		PGA13	0.493509	5.14e-05	0.0166909	5.29643	1.77918e-05	4.01612e-05
PGA17		297.562	293.277	343.498	29.8847	30.1734	236.284	1	1	1		328.857	302.038	343.498	33.3474	32.4001	236.284	1	1	1		324.797	100.677	1		324.797	102.69	1		PGA17	0.316165	0.0312667	0.000145753	0.00307884	1.17427e-05	3.15748e-05
PGA25		181.562	175.277	200.498	3.88472	7.17339	156.284	1	1	1		200.657	180.513	200.498	4.33483	7.70277	156.284	1	1	1		193.889	56.1072	1		193.889	57.2287	1		PGA25	0.295162	0.0526557	0.000106162	0.00515758	8.60414e-06	2.60275e-05
PGA34		949.562	968.277	944.498	215.885	272.173	219.284	86.8438	74.2756	42.6826		1049.43	997.202	944.498	240.899	292.259	219.284	86.8438	91.0628	60.6403		997.042	250.814	79.5157		997.042	255.828	91.4648		PGA34	0.256587	3.65557e-05	0.000106162	0.0917361	8.53519e-06	2.60275e-05
PGA37		310.562	328.277	394.498	66.8847	91.1734	67.2839	1	1	1		343.224	338.083	394.498	74.6345	97.9019	67.2839	1	1	1		358.602	79.9401	1		358.602	81.5381	1		PGA37	0.227378	0.000161144	0.00102885	0.00278861	3.79508e-05	7.59088e-05
PGA48		1869.56	1877.28	1563.5	1700.88	1519.17	1566.28	559.844	534.276	410.683		2066.18	1933.36	1563.5	1897.96	1631.29	1566.28	559.844	655.029	583.468		1854.35	1698.51	599.447		1854.35	1732.46	689.528		PGA48	0.934272	0.438802	0.0116397	0.371844	0.00120677	0.00075854
PGA53		1436.56	1489.28	1831.5	1648.88	1678.17	2130.28	1625.84	1536.28	874.683		1587.65	1533.77	1831.5	1839.94	1802.02	2130.28	1625.84	1883.49	1242.69		1650.97	1924.08	1584.01		1650.97	1962.54	1822.04		PGA53	1.18872	0.119602	0.137223	1.10362	0.763056	0.200717
PGA7		6483.56	6927.28	8266.5	9756.88	10163.2	10785.3	3052.84	2542.28	1804.68		7165.44	7134.21	8266.5	10887.4	10913.2	10785.3	3052.84	3116.86	2563.96		7522.05	10862	2911.22		7522.05	11079.1	3348.7		PGA7	1.47288	0.000872799	0.354515	0.445185	0.000360366	0.000290695
PHO89		4094.56	4448.28	2810.5	3274.88	4757.17	3891.28	3546.84	3666.28	1372.68		4525.19	4581.16	2810.5	3654.34	5108.25	3891.28	3546.84	4494.9	1950.21		3972.28	4217.96	3330.65		3972.28	4302.27	3831.16		PHO89	1.08307	0.755045	0.0296998	0.964474	0.533534	0.147314
PHR1		4722.56	4863.28	7594.5	4752.88	5195.17	4792.28	8470.84	6584.28	4936.68		5219.23	5008.55	7594.5	5303.59	5578.57	4792.28	8470.84	8072.4	7013.69		5940.76	5224.82	7852.31		5940.76	5329.26	9032.31		PHR1	0.897066	0.452195	0.0219424	1.5204	0.110713	0.0354869
PHR2		278.562	264.277	238.498	223.885	342.173	317.284	473.844	354.276	301.683		307.859	272.172	238.498	249.826	367.425	317.284	473.844	434.346	428.609		272.843	311.512	445.6		272.843	317.739	512.562		PHR2	1.16455	0.383244	0.00190416	1.8786	0.00215262	0.00113468
PIL1		12218.6	13150.3	13320.5	14416.9	14890.2	18072.3	8797.84	6193.28	5320.68		13503.6	13543.1	13320.5	16087.3	15989	18072.3	8797.84	7593.03	7559.25		13455.7	16716.2	7983.37		13455.7	17050.4	9183.06		PIL1	1.26715	0.00877402	0.0047686	0.682465	0.000187621	0.00019741
PIR1		2567.56	2465.28	2986.5	6957.88	7456.17	8122.28	838.844	678.276	465.683		2837.59	2538.92	2986.5	7764.08	8006.43	8122.28	838.844	831.574	661.609		2787.67	7964.27	777.342		2787.67	8123.47	894.156		PIR1	2.91407	6.71708e-06	0.00190416	0.320754	0.000151737	0.000179124
PLB5		467.562	517.277	529.498	423.885	521.173	566.284	609.844	525.276	505.683		516.736	532.729	529.498	473	559.635	566.284	609.844	643.994	718.438		526.321	532.973	657.425		526.321	543.627	756.219		PLB5	1.03288	0.837724	0.000738158	1.4368	0.0155681	0.00597945
POL1		154.562	184.277	184.498	160.885	195.173	159.284	469.844	407.276	310.683		170.818	189.782	184.498	179.526	209.577	159.284	469.844	499.325	441.396		181.699	182.796	470.188		181.699	186.45	540.845		POL1	1.02615	0.947546	0.00150391	2.9766	8.20521e-05	0.000124104
PRA1		57.5622	48.277	43.4975	239.885	161.173	180.284	351.844	329.276	85.6826		63.6161	49.7192	43.4975	267.68	173.068	180.284	351.844	403.696	121.732		52.2776	207.01	292.424		52.2776	211.149	336.367		PRA1	4.03899	0.00752097	0.00358658	6.43426	0.0505903	0.0172434
RBR1		36.5622	49.277	53.4975	1	1	1	1	1	1		40.4075	50.749	53.4975	1	1	1	1	1	1		48.218	1	1		48.218	1	1		RBR1	0.0211537	0.000290475	0.00119476	0.0207391	0.000290475	0.000250709
RBR2		677.562	737.277	712.498	267.885	384.173	986.284	16.8438	16.2756	1		748.821	759.301	712.498	298.924	412.525	986.284	16.8438	19.9541	1		740.207	565.911	12.5993		740.207	577.223	14.4926		RBR2	0.779814	0.459531	0.000106162	0.0195792	1.18418e-06	1.42579e-05
RBT1		348.562	395.277	358.498	289.885	273.173	360.284	826.844	761.276	301.683		385.221	407.085	358.498	323.473	293.333	360.284	826.844	933.333	428.609		383.601	325.697	729.595		383.601	332.207	839.234		RBT1	0.866023	0.072702	0.00271344	2.18778	0.0883088	0.0288794
RBT5		56791.6	59683.3	63232.5	91790.9	101091	102941	43850.8	35048.3	27174.7		62764.3	61466.2	63232.5	102427	108552	102941	43850.8	42969.6	38607.8		62487.7	104640	41809.4		62487.7	106732	48092.3		RBT5	1.70804	3.18701e-05	0.15708	0.769629	0.000265081	0.000250709
RCT1		8896.56	9828.28	13581.5	6760.88	7196.17	9094.28	7696.84	5461.28	5320.68		9832.21	10121.9	13581.5	7544.26	7727.24	9094.28	7696.84	6695.59	7559.25		11178.5	8121.93	7317.23		11178.5	8284.28	8416.81		RCT1	0.741089	0.0783931	0.18422	0.752945	0.0361255	0.0126701
RFG1		857.562	863.277	639.498	1178.88	1267.17	1042.28	3782.84	3013.28	2711.68		947.752	889.065	639.498	1315.48	1360.69	1042.28	3782.84	3694.31	3852.57		825.438	1239.48	3776.57		825.438	1264.26	4344.09		RFG1	1.53162	0.0392438	0.0612695	5.26277	9.53836e-06	2.71563e-05
RFX2		305.562	309.277	393.498	100.885	94.1734	129.284	678.844	554.276	513.683		337.698	318.516	393.498	112.574	101.123	129.284	678.844	679.549	729.804		349.904	114.327	696.065		349.904	116.612	800.666		RFX2	0.33327	0.00059711	0.00325629	2.28824	0.000249942	0.000246881
RHR2		11146.6	11343.3	12908.5	8844.88	8265.17	7409.28	4693.84	4648.28	1501.68		12318.8	11682.1	12908.5	9869.73	8875.13	7409.28	4693.84	5698.84	2133.48		12303.2	8718.05	4175.39		12303.2	8892.32	4802.84		RHR2	0.722767	0.0108616	0.000187032	0.390375	0.0019074	0.00105911
RIM101		3049.56	3355.28	4197.5	3065.88	3117.17	2784.28	944.844	777.276	628.683		3370.28	3455.51	4197.5	3421.12	3347.22	2784.28	944.844	952.95	893.187		3674.43	3184.21	930.327		3674.43	3247.86	1070.13		RIM101	0.883908	0.212518	0.0124328	0.291237	0.000479187	0.000368137
RNR22		291.562	339.277	379.498	319.885	292.173	269.284	1381.84	1785.28	1077.68		322.226	349.412	379.498	356.949	313.735	269.284	1381.84	2188.77	1531.09		350.378	313.323	1700.57		350.378	319.586	1956.12		RNR22	0.912117	0.287555	0.075705	5.58288	0.00556138	0.00246946
ROB1		1474.56	1666.28	1506.5	2609.88	2886.17	2910.28	2211.84	1939.28	1726.68		1629.64	1716.05	1506.5	2912.29	3099.17	2910.28	2211.84	2377.58	2453.15		1617.4	2973.91	2347.52		1617.4	3033.36	2700.29		ROB1	1.87546	0.000100094	0.000125082	1.66953	0.00146164	0.000873374
RPN4		815.562	827.277	916.498	2279.88	2653.17	1922.28	1125.84	964.276	758.683		901.335	851.99	916.498	2544.05	2848.97	1922.28	1125.84	1182.21	1077.88		889.941	2438.44	1128.65		889.941	2487.18	1298.25		RPN4	2.79477	0.0047892	0.0430134	1.45881	0.00265427	0.00135228
RTA3		10.5622	3.27702	1	49.8847	47.1734	42.2839	1	1	1		11.6731	3.37491	1	55.6648	50.6547	42.2839	1	1	1		5.34933	49.5345	1		5.34933	50.5246	1		RTA3	9.44504	0.000954536	0.217686	0.186939	0.250024	0.0728985
SAP1		20.5622	32.277	1	53.8847	49.1734	30.2839	1	8.27559	8.68257		22.7248	33.2412	1	60.1282	52.8023	30.2839	1	10.146	12.3356		18.9887	47.7381	7.82718		18.9887	48.6924	9.0034		SAP1	2.56429	0.0926383	0.400829	0.474146	0.331441	0.0943631
SAP10		64.5622	92.277	81.4975	172.885	186.173	244.284	1	1	1		71.3522	95.0335	81.4975	192.917	199.913	244.284	1	1	1		82.6278	212.371	1		82.6278	216.616	1		SAP10	2.62159	0.00176065	0.243147	0.0121025	0.000285627	0.000250709
SAP2		13.5622	7.27702	1	1	1	1	1	1	1		14.9886	7.4944	1	1	1	1	1	1	1		7.82766	1	1		7.82766	1	1		SAP2	0.130306	0.16642	0.119268	0.127752	0.16642	0.0509792
SAP4		101.562	81.277	58.4975	5.88472	25.1734	4.28386	1	1	1		112.244	83.7049	58.4975	6.56657	27.0311	4.28386	1	1	1		84.8153	12.6272	1		84.8153	12.8796	1		SAP4	0.151855	0.0135328	0.00829146	0.0117903	0.00569709	0.00248666
SAP5		2194.56	2425.28	3218.5	40.8847	58.1734	66.2839	774.844	545.276	779.683		2425.36	2497.73	3218.5	45.622	62.4665	66.2839	774.844	668.515	1107.72		2713.86	58.1241	850.359		2713.86	59.286	978.145		SAP5	0.0218456	0.000467516	0.00150391	0.360425	0.00285151	0.00143764
SAP6		549.562	532.277	653.498	8.88472	12.1734	9.28386	1	1	1		607.36	548.177	653.498	9.91417	13.0718	9.28386	1	1	1		603.012	10.7566	1		603.012	10.9716	1		SAP6	0.0181947	4.14832e-05	0.000282104	0.00165834	3.87668e-05	7.59088e-05
SAP9		2881.56	3209.28	3181.5	2993.88	3062.17	3342.28	571.844	392.276	399.683		3184.62	3305.15	3181.5	3340.78	3288.16	3342.28	571.844	480.935	567.84		3223.75	3323.74	540.206		3223.75	3390.18	621.385		SAP9	1.05163	0.0875838	0.00271599	0.192752	7.42679e-07	1.19819e-05
SCW11		820.562	965.277	659.498	1791.88	1866.17	2296.28	85.8438	125.276	25.6826		906.861	994.112	659.498	1999.51	2003.89	2296.28	85.8438	153.589	36.488		853.49	2099.9	91.9737		853.49	2141.87	105.795		SCW11	2.50954	0.000887198	0.0217221	0.123956	0.0019749	0.00107399
SCW4		294.562	311.277	383.498	1	24.1734	276.284	1	1	1		325.541	320.576	383.498	1	25.9574	276.284	1	1	1		343.205	101.08	1		343.205	103.101	1		SCW4	0.300407	0.0549619	0.000651983	0.00291371	7.11477e-05	0.000118743
SEF1		1588.56	1649.28	1443.5	1517.88	1615.17	1494.28	1344.84	1041.28	831.683		1755.63	1698.54	1443.5	1693.76	1734.37	1494.28	1344.84	1276.62	1181.6		1632.56	1640.8	1267.69		1632.56	1673.6	1458.18		SEF1	1.02514	0.949055	0.00268619	0.89319	0.0270243	0.009761
SEF2		415.562	443.277	496.498	222.885	312.173	470.284	269.844	142.276	168.683		459.267	456.519	496.498	248.71	335.211	470.284	269.844	174.432	239.652		470.761	351.402	227.976		470.761	358.426	262.235		SEF2	0.761376	0.143649	0.399541	0.557044	0.00142936	0.000864765
SGA1		482.562	475.277	444.498	322.885	491.173	344.284	116.844	88.2756	98.6826		533.313	489.475	444.498	360.297	527.421	344.284	116.844	108.227	140.201		489.095	410.667	121.757		489.095	418.876	140.054		SGA1	0.856431	0.287157	0.0529832	0.286354	0.00017804	0.000191492
SIN3		869.562	912.277	1102.5	1250.88	1339.17	1518.28	1302.84	1033.28	927.683		961.014	939.529	1102.5	1395.82	1438	1518.28	1302.84	1266.81	1317.99		1001.01	1450.7	1295.88		1001.01	1479.7	1490.62		SIN3	1.4782	0.00197443	0.0311946	1.48911	0.00522602	0.00237023
SIT1		2274.56	2329.28	2162.5	3776.88	4372.17	3374.28	824.844	450.276	337.683		2513.78	2398.86	2162.5	4214.51	4694.83	3374.28	824.844	552.044	479.755		2358.38	4094.54	618.881		2358.38	4176.39	711.882		SIT1	1.77087	0.0121983	0.153422	0.301853	0.000295257	0.000250709
SMC2		134.562	115.277	162.498	179.885	169.173	224.284	216.844	164.276	158.683		148.714	118.721	162.498	200.728	181.658	224.284	216.844	201.404	225.445		143.311	202.223	214.564		143.311	206.266	246.808		SMC2	1.43929	0.0299726	0.26912	1.72218	0.00838191	0.00340911
SOD4		348.562	382.277	236.498	2000.88	852.173	816.284	917.844	2043.28	595.683		385.221	393.696	236.498	2232.72	915.063	816.284	917.844	2505.08	846.303		338.472	1321.36	1423.08		338.472	1347.77	1636.93		SOD4	3.98193	0.0991538	0.0949156	4.83623	0.116848	0.0369638
SOD5		25247.6	26888.3	34605.5	14319.9	11834.2	12467.3	29677.8	25213.3	21981.7		27902.8	27691.5	34605.5	15979.1	12707.5	12467.3	29677.8	30911.8	31230		30066.6	13718	30606.5		30066.6	13992.2	35205.9		SOD5	0.465373	0.00298471	0.0117577	1.17093	0.827327	0.215283
SOD6		553.562	630.277	831.498	360.885	361.173	402.284	27.8438	19.2756	86.6826		611.78	649.105	831.498	402.7	387.827	402.284	27.8438	23.6321	123.152		697.461	397.604	58.2094		697.461	405.552	66.9568		SOD6	0.581469	0.0116357	0.0047686	0.0960008	0.00105323	0.000679687
SOG2		234.562	243.277	262.498	277.885	316.173	315.284	270.844	249.276	180.683		259.231	250.544	262.498	310.083	339.507	315.284	270.844	305.615	256.701		257.424	321.624	277.72		257.424	328.054	319.454		SOG2	1.27437	0.00274679	0.0604715	1.24096	0.246515	0.072311
SSB1		4952.56	5277.28	6185.5	4019.88	3345.17	2906.28	20906.8	17844.3	11002.7		5473.42	5434.92	6185.5	4485.66	3592.04	2906.28	20906.8	21877.3	15631.8		5697.95	3661.33	19472		5697.95	3734.52	22398.1		SSB1	0.655415	0.0171098	0.00277247	3.93091	0.00214233	0.00113468
STF2		26412.6	28402.3	33206.5	26411.9	24521.2	30683.3	9704.84	6497.28	10866.7		29190.4	29250.7	33206.5	29472.2	26330.8	30683.3	9704.84	7965.74	15438.6		30549.2	28828.8	11036.4		30549.2	29405	12694.9		STF2	0.962547	0.406604	0.0836002	0.415555	0.00173531	0.000999872
STP2		2027.56	2065.28	2075.5	2213.88	2417.17	2127.28	1022.84	838.276	829.683		2240.8	2126.97	2075.5	2470.4	2595.56	2127.28	1022.84	1027.74	1178.75		2147.76	2397.75	1076.44		2147.76	2445.68	1238.21		STP2	1.13871	0.16702	0.198612	0.576511	0.000110811	0.000144953
SUT1		266.562	310.277	218.498	369.885	365.173	447.284	479.844	481.276	386.683		294.597	319.546	218.498	412.743	392.123	447.284	479.844	590.05	549.371		277.547	417.383	539.755		277.547	425.726	620.866		SUT1	1.53389	0.0152673	0.18435	2.23698	0.0040668	0.00192974
TEC1		2010.56	1988.28	2016.5	2123.88	2380.17	1428.28	573.844	458.276	393.683		2222.01	2047.67	2016.5	2369.98	2555.83	1428.28	573.844	561.852	559.316		2095.39	2118.03	565.004		2095.39	2160.37	649.909		TEC1	1.03101	0.952198	0.26486	0.310161	1.82551e-05	4.01612e-05
TPK1		653.562	746.277	570.498	716.885	787.173	498.284	292.844	281.276	186.683		722.297	768.57	570.498	799.949	845.266	498.284	292.844	344.847	265.225		687.122	714.5	300.972		687.122	728.782	346.2		TPK1	1.06063	0.836387	0.00357215	0.503841	0.00385092	0.00184539
TPK2		780.562	727.277	576.498	928.885	1022.17	1195.28	968.844	714.276	755.683		862.654	749.002	576.498	1036.51	1097.61	1195.28	968.844	875.711	1073.62		729.385	1109.8	972.725		729.385	1131.99	1118.9		TPK2	1.55197	0.0161688	0.0264185	1.53403	0.0734853	0.0245289
TPS2		4413.56	5005.28	5841.5	2673.88	2457.17	3119.28	3397.84	2730.28	2799.68		4877.74	5154.8	5841.5	2983.7	2638.51	3119.28	3397.84	3347.35	3977.59		5291.34	2913.83	3574.26		5291.34	2972.08	4111.38		TPS2	0.561687	0.0017568	0.322968	0.777001	0.008061	0.00333464
TRR1		1218.56	1388.28	1838.5	1847.88	1796.17	1953.28	2277.84	1784.28	1200.68		1346.72	1429.75	1838.5	2062	1928.73	1953.28	2277.84	2187.54	1705.84		1538.32	1981.34	2057.08		1538.32	2020.94	2366.2		TRR1	1.31373	0.0481005	0.075705	1.53817	0.0906494	0.0294458
TRX1		3047.56	3073.28	2559.5	6073.88	6029.17	7363.28	10771.8	8004.28	6643.68		3368.07	3165.08	2559.5	6777.66	6474.12	7363.28	10771.8	9813.34	9438.87		3030.88	6871.69	10008		3030.88	7009.05	11512		TRX1	2.31254	0.000420806	0.0366592	3.79822	0.000115266	0.000146812
TTR1		1217.56	1328.28	1275.5	1725.88	1782.17	2042.28	3505.84	2851.28	2292.68		1345.61	1367.96	1275.5	1925.86	1913.7	2042.28	3505.84	3495.7	3257.28		1329.69	1960.61	3419.61		1329.69	1999.81	3933.48		TTR1	1.50396	0.000219238	0.300261	2.9582	1.69016e-05	4.01612e-05
TUP1		633.562	744.277	756.498	1102.88	1241.17	1382.28	1151.84	827.276	723.683		700.194	766.51	756.498	1230.67	1332.77	1382.28	1151.84	1014.25	1028.16		741.067	1315.24	1064.75		741.067	1341.53	1224.75		TUP1	1.81027	0.000307637	0.0116397	1.65269	0.00259131	0.00133425
TYE7		2793.56	2964.28	2586.5	3929.88	4310.17	4053.28	9369.84	8920.28	4508.68		3087.36	3052.83	2586.5	4385.23	4628.26	4053.28	9369.84	10936.4	6405.61		2908.9	4355.59	8903.94		2908.9	4442.66	10242		TYE7	1.52727	0.00337301	0.321844	3.52091	0.0109927	0.00432558
UCF1		34365.6	36516.3	28164.5	30297.9	30489.2	35293.3	35186.8	22413.3	41129.7		37979.8	37607.1	28164.5	33808.4	32739.2	35293.3	35186.8	27479	58434.1		34583.8	33947	40366.6		34583.8	34625.6	46432.7		UCF1	1.00121	0.8562	0.00903689		0.588405	0.160897
UGA32		150.562	143.277	192.498	149.885	155.173	195.284	245.844	245.276	228.683		166.397	147.557	192.498	167.252	166.625	195.284	245.844	300.711	324.896		168.817	176.387	290.484		168.817	179.913	334.136		UGA32	1.06573	0.662646	0.00903689	1.97927	0.0104596	0.00414955
UGP1		2981.56	3195.28	4168.5	3372.88	3356.17	4113.28	6148.84	5050.28	4550.68		3295.13	3290.73	4168.5	3763.7	3603.85	4113.28	6148.84	6191.7	6465.29		3584.79	3826.94	6268.61		3584.79	3903.44	7210.62		UGP1	1.08889	0.50173	0.171583	2.01145	0.000958012	0.000635175
UME6		204.562	235.277	198.498	26.8847	33.1734	15.2839	1192.84	848.276	893.683		226.076	242.305	198.498	29.9998	35.6215	15.2839	1192.84	1040	1269.68		222.293	26.9684	1167.51		222.293	27.5075	1342.95		UME6	0.123744	0.000159701	0.000689634	6.04136	0.000161738	0.000181243
UPC2		149.562	192.277	162.498	129.885	148.173	153.284	445.844	395.276	263.683		165.292	198.021	162.498	144.934	159.108	153.284	445.844	484.613	374.621		175.27	152.442	435.026		175.27	155.489	500.399		UPC2	0.887142	0.132819	0.0577921	2.85502	0.00160651	0.000936807
WH11		22900.6	25348.3	23746.5	18604.9	17174.2	30403.3	793.844	577.276	678.683		25309	26105.5	23746.5	20760.6	18441.6	30403.3	793.844	707.747	964.224		25053.7	23201.8	821.938		25053.7	23665.6	945.454		WH11	0.944597	0.645382	0.0185317	0.0377371	4.08307e-06	1.97621e-05
YHB1		10245.6	10446.3	10483.5	796.885	629.173	1324.28	650.844	763.276	570.683		11323.1	10758.3	10483.5	889.218	675.606	1324.28	650.844	935.785	810.785		10855	963.036	799.138		10855	982.287	919.227		YHB1	0.0904919	5.91835e-06	0.000106162	0.0846826	2.69146e-06	1.55436e-05
YWP1		170.562	163.277	167.498	8709.88	9463.17	6278.28	516.844	569.276	235.683		188.5	168.154	167.498	9719.08	10161.5	6278.28	516.844	697.939	334.841		174.717	8719.64	516.541		174.717	8893.94	594.164		YWP1	50.9047	0.00223725	0.00125002	3.40071	0.0312543	0.0111229
ZAP1		37.5622	45.277	53.4975	42.8847	59.1734	62.2839	497.844	308.276	300.683		41.5127	46.6295	53.4975	47.8537	63.5403	62.2839	497.844	377.95	427.188		47.2133	57.8926	434.327		47.2133	59.0499	499.595		ZAP1	1.25071	0.155616	0.00175901	10.5817	0.000378581	0.000295537
ZCF20		415.562	391.277	356.498	533.885	599.173	671.284	262.844	192.276	86.6826		459.267	402.965	356.498	595.745	643.392	671.284	262.844	235.732	123.152		406.243	636.807	207.243		406.243	649.536	238.386		ZCF20	1.59889	0.00337893	0.490921	0.586806	0.0187562	0.00703719
ZCF3		1191.56	1226.28	1013.5	1330.88	1488.17	1381.28	654.844	579.276	439.683		1316.88	1262.91	1013.5	1485.09	1598	1381.28	654.844	710.199	624.67		1197.76	1488.12	663.238		1197.76	1517.87	762.905		ZCF3	1.26726	0.0612021	0.0409333	0.636942	0.00523998	0.00237023
ZCF31		80.5622	107.277	75.4975	115.885	111.173	102.284	142.844	98.2756	74.6826		89.035	110.482	75.4975	129.312	119.378	102.284	142.844	120.487	106.104		91.6714	116.991	123.145		91.6714	119.33	141.65		ZCF31	1.30171	0.120856	0.330215	1.5452	0.100011	0.0322703
ZCF34		111.562	113.277	89.4975	143.885	156.173	166.284	355.844	267.276	231.683		123.295	116.661	89.4975	160.556	167.699	166.284	355.844	327.683	329.158		109.818	164.846	337.562		109.818	168.142	388.288		ZCF34	1.53109	0.00648271	0.228862	3.53575	7.91066e-05	0.000123508
ZCF39		820.562	869.277	987.498	837.885	972.173	995.284	1047.84	825.276	605.683		906.861	895.244	987.498	934.969	1043.92	995.284	1047.84	1011.8	860.511		929.868	991.39	973.384		929.868	1011.21	1119.66		ZCF39	1.08748	0.224238	0.354515	1.2041	0.535687	0.147314
ZCF7		104.562	84.277	57.4975	78.8847	79.1734	86.2839	73.8438	82.2756	34.6826		115.559	86.7946	57.4975	88.025	85.0163	86.2839	73.8438	100.871	49.2745		86.6171	86.4417	74.6631		86.6171	88.1696	85.883		ZCF7	1.01792	0.992164	0.271293	0.991525	0.622253	0.168252
ZRT1		72.5622	67.277	72.4975	157.885	98.1734	116.284	258.844	221.276	23.6826		80.1936	69.2867	72.4975	176.179	105.418	116.284	258.844	271.287	33.6465		73.9926	132.627	187.926		73.9926	135.278	216.166		ZRT1	1.82826	0.0577758	0.00903689	2.92145	0.21447	0.0644742
ZRT2		199.562	232.277	299.498	372.885	484.173	331.284	1127.84	1145.28	449.683		220.55	239.216	299.498	416.09	519.905	331.284	1127.84	1404.12	638.877		253.088	422.426	1056.95		253.088	430.87	1215.78		ZRT2	1.70245	0.0466226	0.0105675	4.80378	0.0233185	0.00868165
orf19.1424		298.562	298.277	330.498	349.885	438.173	519.284	378.844	224.276	245.683		329.962	307.187	330.498	390.425	470.51	519.284	378.844	274.965	349.048		322.549	460.073	334.286		322.549	469.27	384.52		orf19.1424	1.45488	0.0230243	0.162136	1.19213	0.730965	0.193326
orf19.1534		103.562	79.277	38.4975	123.885	161.173	174.284	220.844	185.276	184.683		114.454	81.6452	38.4975	138.239	173.068	174.284	220.844	227.15	262.384		78.1989	161.864	236.793		78.1989	165.099	272.376		orf19.1534	2.11127	0.0285457	0.0836002	3.48312	0.00340767	0.00166597
orf19.1691		63.5622	65.277	1	18.8847	31.1734	21.2839	4437.84	4827.28	3206.68		70.2471	67.227	1	21.0729	33.4739	21.2839	4437.84	5918.3	4555.83		46.158	25.2769	4970.66		46.158	25.7822	5717.61		orf19.1691	0.558563	0.414638	0.118325	123.87	0.000490988	0.00037131
orf19.1862		4616.56	5165.28	5439.5	5063.88	4945.17	7019.28	3340.84	2132.28	2787.68		5102.09	5319.58	5439.5	5650.63	5310.12	7019.28	3340.84	2614.2	3960.54		5287.05	5993.34	3305.19		5287.05	6113.15	3801.88		orf19.1862	1.15625	0.25467	0.0161018	0.719092	0.00783157	0.00326765
orf19.2125		1218.56	1306.28	1289.5	1603.88	1738.17	1442.28	3351.84	2485.28	2125.68		1346.72	1345.3	1289.5	1789.72	1866.45	1442.28	3351.84	3046.98	3020.02		1327.17	1699.49	3139.61		1327.17	1733.46	3611.41		orf19.2125	1.30613	0.0476426	0.00277247	2.72114	7.40389e-05	0.000119449
orf19.3615		918.562	922.277	855.498	739.885	870.173	851.284	735.844	551.276	508.683		1015.17	949.828	855.498	825.614	934.391	851.284	735.844	675.871	722.7		940.164	870.43	711.472		940.164	887.829	818.387		orf19.3615	0.944334	0.286815	0.484647	0.870472	0.0100835	0.0040334
orf19.409		4626.56	5002.28	4848.5	5449.88	5458.17	4714.28	2992.84	2578.28	1940.68		5113.14	5151.71	4848.5	6081.35	5860.98	4714.28	2992.84	3161	2757.18		5037.78	5552.21	2970.34		5037.78	5663.19	3416.71		orf19.409	1.12414	0.301834	0.000776403	0.678216	0.000164766	0.000181243
orf19.411		182.562	188.277	275.498	593.885	656.173	630.284	111.844	115.276	51.6826		201.762	193.901	275.498	662.697	704.598	630.284	111.844	141.329	73.4269		223.72	665.86	108.867		223.72	679.17	125.226		orf19.411	3.0358	0.000195702	0.00568795	0.559745	0.0243468	0.00894299
orf19.4174		338.562	375.277	430.498	373.885	379.173	437.284	114.844	92.2756	91.6826		374.169	386.487	430.498	417.206	407.156	437.284	114.844	113.131	130.256		397.051	420.549	119.41		397.051	428.955	137.355		orf19.4174	1.08035	0.289357	0.154267	0.345936	0.000101819	0.00013689
orf19.449		2756.56	3212.28	3838.5	3799.88	3676.17	3601.28	648.844	419.276	659.683		3046.47	3308.23	3838.5	4240.17	3947.47	3601.28	648.844	514.037	937.23		3397.73	3929.64	700.037		3397.73	4008.19	805.234		orf19.449	1.17967	0.148075	0.322968	0.236991	0.000519175	0.000386586
orf19.4706		640.562	751.277	743.498	587.885	681.173	629.284	516.844	351.276	365.683		707.93	773.719	743.498	656.002	731.443	629.284	516.844	430.668	519.536		741.716	672.243	489.016		741.716	685.681	562.502		orf19.4706	0.924452	0.125966	0.134141	0.75838	0.00191644	0.00105911
orf19.5517		258.562	291.277	162.498	333.885	327.173	372.284	753.844	640.276	402.683		285.755	299.978	162.498	372.571	351.318	372.284	753.844	784.986	572.103		249.41	365.391	703.644		249.41	372.695	809.383		orf19.5517	1.49431	0.0586022	0.137223	3.24519	0.00463017	0.00215481
orf19.5626		1490.56	1667.28	1204.5	1858.88	2029.17	1988.28	597.844	459.276	417.683		1647.32	1717.08	1204.5	2074.27	2178.92	1988.28	597.844	563.078	593.414		1522.97	2080.49	584.778		1522.97	2122.08	672.655		orf19.5626	1.39339	0.0303503	0.0405542	0.441674	0.00430794	0.00202431
orf19.5848		250.562	319.277	351.498	160.885	180.173	194.284	24.8438	10.2756	35.6826		276.914	328.815	351.498	179.526	193.47	194.284	24.8438	12.598	50.6952		319.075	189.093	29.379		319.075	192.873	33.7939		orf19.5848	0.604476	0.0045225	0.00811811	0.105912	0.000305456	0.000254898
orf19.6578		1834.56	2107.28	1850.5	1099.88	1130.17	971.284	385.844	237.276	305.683		2027.5	2170.23	1850.5	1227.33	1213.58	971.284	385.844	290.903	434.292		2016.08	1137.4	370.346		2016.08	1160.13	425.999		orf19.6578	0.575441	0.00211682	0.0934104	0.211301	8.50225e-05	0.0001247
orf19.6660		216.562	259.277	253.498	685.885	673.173	534.284	347.844	294.276	220.683		239.338	267.022	253.498	765.357	722.853	534.284	347.844	360.786	313.53		253.286	674.165	340.72		253.286	687.641	391.921		orf19.6660	2.71488	0.00415462	0.102122	1.54735	0.0057115	0.00248666
orf19.670.2		35350.6	41057.3	43613.5	42534.9	40108.2	38302.3	4980.84	3171.28	6799.68		39068.4	42283.8	43613.5	47463.3	43068.1	38302.3	4980.84	3888.02	9660.5		41655.2	42944.6	6176.46		41655.2	43803	7104.61		orf19.670.2	1.05156	0.686535	0.114338	0.170558	9.05641e-05	0.000128921
ARP3		821.562	873.277	1075.5	1129.88	1137.17	1355.28	880.844	655.276	606.683		907.966	899.364	1075.5	1260.8	1221.1	1355.28	880.844	803.376	861.931		960.942	1279.06	848.717		960.942	1304.63	976.257		ARP3	1.35766	0.0103533	0.132867	1.01594	0.144004	0.0449664
CLN3		1113.56	1226.28	728.498	1629.88	1838.17	2171.28	3041.84	2106.28	2053.68		1230.68	1262.91	728.498	1818.74	1973.83	2171.28	3041.84	2582.32	2917.73		1074.03	1987.95	2847.3		1074.03	2027.69	3275.17		CLN3	1.88793	0.0104158	0.484647	3.04943	0.00130544	0.000799785
CMK2		886.562	995.277	1107.5	810.885	893.173	1176.28	1212.84	938.276	1037.68		979.802	1025.01	1107.5	904.841	959.088	1176.28	1212.84	1150.34	1474.27		1037.44	1013.4	1279.15		1037.44	1033.66	1471.37		CMK2	0.996362	0.804696	0.189996	1.41828	0.0848015	0.027921
YRA1		1011.56	1129.28	990.498	1148.88	1226.17	1436.28	957.844	722.276	512.683		1117.95	1163.01	990.498	1282	1316.66	1436.28	957.844	885.519	728.383		1090.49	1344.98	857.249		1090.49	1371.87	986.07		YRA1	1.25804	0.0217066	0.148086	0.904249	0.0520085	0.0176029
orf19.3456		79.5622	134.277	98.4975	134.885	163.173	188.284	17.8438	12.2756	19.6826		87.9298	138.288	98.4975	150.514	175.215	188.284	17.8438	15.05	27.9636		108.239	171.338	20.2858		108.239	174.763	23.3342		orf19.3456	1.61461	0.0289349	0.357341	0.215582	0.0051309	0.0023651
Sum		724412	777376	800598	703406	730964	784908	696010	567702	489897											Sum	800598	784908	696007
NF		1.10517	1.02987	1	1.11587	1.0738	1	1	1.22601	1.42073											NF	1	1.01999	1.15027

## Sheet: In vivo_Ear-brg1nrg1
Probe Name		Counts after Background subtraction													Normalize count - WT						Normalize count - efg1			Normalize count-brg1ΔΔ+nrg1ΔΔ				Avg_Individual replicates				Normalize to WT-Avg				Probe name	brg1ΔΔ/WT			brg1ΔΔ nrg1ΔΔ/wt
		WT_E1	WT_E2	WT_E3	WT_E4	WT_E5	WT_E6	brg1ΔΔ	brg1ΔΔ	brg1ΔΔ	brg1ΔΔ nrg1ΔΔ	brg1ΔΔ nrg1ΔΔ	brg1ΔΔ nrg1ΔΔ		WT_E1	WT_E2	WT_E3	WT_E4	WT_E5	WT_E6	brg1ΔΔ	brg1ΔΔ	brg1ΔΔ	brg1ΔΔ nrg1ΔΔ	brg1ΔΔ nrg1ΔΔ	brg1ΔΔ nrg1ΔΔ		Avg_WT	Avg_brg1ΔΔ	Avg_brg1ΔΔ+nrg1ΔΔ		WT	Avg_brg1ΔΔ	Avg_brg1ΔΔ nrg1ΔΔ			FC	T-test	FDR	FC	T-test	FDR
ACE2		171.094	146.52	201.292	167.844	191.765	106.039	1482.1	1090.61	641.066	23.5848	68.0595	35.9232		186.906	177.066	201.292	186.264	253.157	255.536	1637.03	1361.26	641.066	58.5089	68.0595	54.0212		210.037	1213.12	60.1966		210.037	2235.76	237.295		ACE2	10.6446	0.00135237	0.00782611	1.12978	0.000199594	0.00151999
ACS1		1412.09	2601.52	1574.29	2954.84	1594.76	1414.04	3213.1	2340.61	2954.07	1506.58	1457.06	797.923		1542.6	3143.87	1574.29	3279.13	2105.32	3407.61	3548.97	2921.47	2954.07	3737.52	1457.06	1199.92		2508.8	3141.5	2131.5		2508.8	5789.74	8402.36		ACS1	2.30777	0.27648	0.255552	3.34915	0.626038	0.346244
ACS2		723.094	1369.52	731.292	1497.84	612.765	280.039	558.1	463.609	646.066	183.585	367.06	308.923		789.921	1655.03	731.292	1662.23	808.937	674.85	616.44	578.662	646.066	455.435	367.06	464.558		1053.71	613.723	429.018		1053.71	1131.08	1691.19		ACS2	1.07343	0.162312	0.187859	1.60498	0.0624371	0.0561934
ADH5		24870.1	12890.5	27998.3	14068.8	20733.8	14121	11407.1	13580.6	16255.1	2340.58	9909.06	3725.92		27168.5	15577.9	27998.3	15612.8	27371.5	34029.5	12599.5	16950.9	16255.1	5806.5	9909.06	5603.04		24626.4	15268.5	7106.2		24626.4	28139.6	28012.6		ADH5	1.14266	0.0779233	0.125566	1.1375	0.0062269	0.0110083
AHR1		2491.09	1344.52	2530.29	1423.84	2911.76	1402.04	407.1	365.609	266.066	397.585	2068.06	693.923		2721.31	1624.82	2530.29	1580.1	3843.95	3378.7	449.656	456.341	266.066	986.324	2068.06	1043.52		2613.2	390.688	1365.97		2613.2	720.031	5384.64		AHR1	0.275537	0.00478459	0.0190553	2.06056	0.0730866	0.0623267
ALS1		4263.09	2930.52	4923.29	3157.84	5836.76	3520.04	3574.1	2744.61	3283.07	1366.58	4911.06	3297.92		4657.08	3541.46	4923.29	3504.4	7705.36	8482.75	3947.71	3425.73	3283.07	3390.21	4911.06	4959.41		5469.06	3552.17	4420.23		5469.06	6546.59	17424.5		ALS1	1.19702	0.177278	0.19566	3.18602	0.451307	0.258262
ALS2		42.094	46.5205	41.2919	62.8437	30.7649	4.03852	45.1004	46.6093	33.0657	1	1	1		45.9842	56.2188	41.2919	69.7406	40.6141	9.73221	49.8149	58.1762	33.0657	1	1	1		43.9303	47.0189	1		43.9303	86.6551	1		ALS2	1.97256	0.817867	0.598122	0.0227633	0.00892987	0.0144927
ALS3		10774.1	10238.5	10950.3	11292.8	8766.76	3759.04	472.1	323.609	298.066	1796.58	3897.06	6691.92		11769.8	12373	10950.3	12532.2	11573.4	9058.7	521.45	403.918	298.066	4456.95	3897.06	10063.3		11376.2	407.811	6139.1		11376.2	751.59	24200.3		ALS3	0.0660667	1.83835e-06	0.000244678	2.12727	0.00998252	0.0152041
ALS4		4614.09	648.52	4714.29	781.844	978.765	1001.04	7278.1	10245.6	15020.1	144.585	678.06	298.923		5040.52	783.721	4714.29	867.648	1292.11	2412.35	8038.9	12788.2	15020.1	358.684	678.06	449.52		2518.44	11949.1	495.421		2518.44	22021.9	1952.95		ALS4	8.74428	0.00108948	0.00725049	0.77546	0.121712	0.0892551
ALS5		105.094	35.5205	114.292	21.8437	114.765	27.0385	195.1	143.609	81.0657	1	7.05954	1.92315		114.807	42.9256	114.292	24.241	151.506	65.1587	215.495	179.248	81.0657	1	7.05954	2.89203		85.4883	158.603	3.65052		85.4883	292.303	14.3904		ALS5	3.41921	0.105649	0.146478	0.168331	0.0268963	0.0316992
ALS6		1	1	1	1	1	1	1	1	1	1	1	1		1	1	1	1	1	1	1	1	1	1	1	1		1	1	1		1	1	1		ALS6	1.84298	1	0.707979	1	1	0.526596
ALS7		758.094	512.52	810.292	548.844	1489.76	922.039	628.1	568.609	393.066	48.5848	259.06	93.9232		828.155	619.368	810.292	609.077	1966.7	2221.97	693.757	709.719	393.066	120.529	259.06	141.242		1175.93	598.847	173.61		1175.93	1103.67	684.37		ALS7	0.93855	0.227822	0.233255	0.581983	0.0535086	0.0515555
ALS9		56.094	76.5205	82.2919	86.8437	52.7649	6.03852	100.1	87.6093	107.066	1	35.0595	31.9232		61.2781	92.4731	82.2919	96.3745	69.6572	14.5519	110.564	109.351	107.066	1	35.0595	48.006		69.4378	108.994	28.0218		69.4378	200.874	110.462		ALS9	2.89286	0.0632955	0.11085	1.59081	0.078802	0.0634767
AOX2		4342.09	2849.52	4840.29	3008.84	3898.76	1830.04	8232.1	6219.61	4855.07	271.585	1231.06	600.923		4743.38	3443.57	4840.29	3339.05	5146.93	4410.11	9092.62	7763.11	4855.07	673.745	1231.06	903.667		4320.56	7236.93	936.157		4320.56	13337.6	3690.33		AOX2	3.087	0.0169453	0.0410077	0.854133	0.000166176	0.00137095
ARG1		140.094	142.52	139.292	170.844	93.7649	31.0385	128.1	131.609	157.066	1.5848	26.0595	54.9232		153.041	172.232	139.292	189.593	123.783	74.798	141.491	164.27	157.066	3.93157	26.0595	82.5934		142.123	154.276	37.5282		142.123	284.328	147.936		ARG1	2.00057	0.635546	0.494685	1.0409	0.00809358	0.0135808
ARG81		135.094	167.52	142.292	175.844	316.765	112.039	109.1	78.6093	97.0657	1	37.0595	27.9232		147.579	202.444	142.292	195.142	418.175	269.996	120.505	98.1175	97.0657	1	37.0595	41.9908		229.271	105.229	26.6834		229.271	193.936	105.186		ARG81	0.845881	0.0855368	0.130862	0.458784	0.0140977	0.0193843
BCR1		778.094	557.52	929.292	566.844	1228.76	648.039	1062.1	1037.61	789.066	112.585	530.06	213.923		850.004	673.75	929.292	629.053	1622.15	1561.67	1173.12	1295.11	789.066	279.299	530.06	321.697		1044.32	1085.77	377.019		1044.32	2001.05	1486.21		BCR1	1.91613	0.88671	0.641419	1.42313	0.0410582	0.0432421
BRG1		3437.09	1575.52	4080.29	1761.84	4078.76	2210.04	1	1	1	1	1	1		3754.74	1903.98	4080.29	1955.2	5384.55	5325.85	1	1	1	1	1	1		3734.1	1	1		3734.1	1	1		BRG1	0.000493555	0.00486762	0.0190553	0.000267802	0.00486762	0.00978657
CAP1		1603.09	1206.52	1642.29	1321.84	1829.76	928.039	1513.1	1174.61	1425.07	302.585	926.06	564.923		1751.25	1458.05	1642.29	1466.91	2415.55	2236.43	1671.27	1466.11	1425.07	750.649	926.06	849.531		1828.41	1520.81	842.08		1828.41	2802.84	3319.48		CAP1	1.53293	0.253157	0.245475	1.8155	0.00494271	0.00978657
CAT1		2842.09	1639.52	2983.29	1719.84	907.765	788.039	1449.1	1365.61	1679.07	689.585	689.06	549.923		3104.75	1981.32	2983.29	1908.59	1198.38	1899.05	1600.58	1704.51	1679.07	1710.71	689.06	826.974		2179.23	1661.38	1075.58		2179.23	3061.91	4239.94		CAT1	1.40504	0.273728	0.254777	1.94562	0.0563562	0.0526346
CDC10		337.094	691.52	382.292	773.844	224.765	99.0385	1	1	1	98.5848	143.06	235.923		368.247	835.685	382.292	858.77	296.722	238.668	1	1	1	244.568	143.06	354.781		496.731	1	247.47		496.731	1	975.524		CDC10	0.00371023	0.0199301	0.0435169	1.96389	0.186008	0.118366
CDR1		1427.09	1467.52	1524.29	1710.84	1858.76	741.039	938.1	648.609	1099.07	475.585	580.06	554.923		1558.98	1773.46	1524.29	1898.6	2453.84	1785.79	1036.16	809.573	1099.07	1179.83	580.06	834.493		1832.49	981.6	864.793		1832.49	1809.07	3409.01		CDR1	0.98722	0.0047563	0.0190553	1.86031	0.00409139	0.00861803
CDR2		21.094	25.5205	15.2919	28.8437	1	1	1	1	1	1	1	1		23.0434	30.8408	15.2919	32.0092	1.32014	2.40985	1	1	1	1	1	1		17.4859	1	1		1	1	1		CDR2	0.105398	0.0806187	0.127742	1	0.0806187	0.0643649
CHT2		111.094	1230.52	111.292	1301.84	118.765	92.0385	28.1004	5.60928	219.066	469.585	232.06	201.923		121.361	1487.05	111.292	1444.72	156.787	221.799	31.0378	7.00132	219.066	1164.94	232.06	303.652		590.501	85.7016	566.884		590.501	157.947	2234.66		CHT2	0.267479	0.256231	0.245475	3.78434	0.959691	0.508072
CHT3		298.094	186.52	318.292	190.844	254.765	151.039	606.1	591.609	670.066	1	1	1		325.643	225.405	318.292	211.788	336.326	363.98	669.458	738.427	670.066	1	1	1		296.906	692.65	1		296.906	1276.54	1		CHT3	4.29949	2.44624e-05	0.000813973	0.00336807	9.95927e-05	0.00100997
CIT1		2130.09	2954.52	2228.29	3167.84	2202.76	1362.04	4102.1	2838.61	3766.07	1777.58	1347.06	1187.92		2326.95	3570.46	2228.29	3515.5	2907.96	3282.3	4530.9	3543.06	3766.07	4409.81	1347.06	1786.4		2971.91	3946.68	2514.42		2971.91	7273.66	9911.85		CIT1	2.44747	0.0456805	0.0855166	3.33518	0.544038	0.306022
CPH1		121.094	124.52	136.292	159.844	71.7649	15.0385	25.1004	30.6093	52.0657	42.5848	36.0595	72.9232		132.285	150.48	136.292	177.386	94.7399	36.2405	27.7242	38.2055	52.0657	105.644	36.0595	109.662		121.237	39.3318	83.7884		121.237	72.4879	330.294		CPH1	0.597901	0.0292449	0.0598845	2.72436	0.300465	0.17812
CPH2		1306.09	1103.52	1407.29	1350.84	1844.76	872.039	1929.1	1724.61	1647.07	251.585	930.06	360.923		1426.8	1333.58	1407.29	1499.09	2435.35	2101.48	2130.75	2152.6	1647.07	624.129	930.06	542.756		1700.6	1976.81	698.981		1700.6	3643.22	2755.38		CPH2	2.14232	0.376914	0.325505	1.62024	0.00945956	0.014865
CRH11		609.094	1114.52	634.292	1133.84	888.765	409.039	228.1	174.609	381.066	25.5848	79.0595	59.9232		665.385	1346.87	634.292	1258.28	1173.3	985.72	251.944	217.941	381.066	63.4705	79.0595	90.1124		1010.64	283.651	77.5475		1010.64	522.764	305.692		CRH11	0.51726	0.00561711	0.0196619	0.302474	0.00134932	0.0046063
CSA1		2691.09	19588.5	2922.29	21704.8	3442.76	1865.04	6587.1	4489.61	7939.07	2657.58	2487.06	2081.92		2939.8	23672.2	2922.29	24086.9	4544.94	4494.45	7275.67	5603.78	7939.07	6592.91	2487.06	3130.79		10443.4	6939.5	4070.25		10443.4	12789.4	16044.9		CSA1	1.22464	0.592607	0.466722	1.53637	0.34471	0.201931
CSH1		1409.09	4572.52	1657.29	4830.84	903.765	500.039	771.1	620.609	1653.07	652.585	540.06	690.923		1539.32	5525.78	1657.29	5361.01	1193.1	1205.02	851.706	774.624	1653.07	1618.93	540.06	1039.01		2746.92	1093.13	1066		2746.92	2014.62	4202.16		CSH1	0.733413	0.232989	0.236724	1.52977	0.227195	0.137989
DAK2		341.094	267.52	388.292	294.844	151.765	93.0385	346.1	336.609	594.066	36.5848	129.06	97.9232		372.617	323.292	388.292	327.202	200.351	224.208	382.279	420.145	594.066	90.7592	129.06	147.257		305.994	465.496	122.358		305.994	857.903	482.337		DAK2	2.80366	0.0388127	0.0748691	1.5763	0.00610778	0.0110083
DDR48		7073.09	23028.5	7396.29	24984.8	6700.76	4604.04	3002.1	2012.61	9306.07	2285.58	2500.06	2615.92		7726.77	27829.4	7396.29	27726.8	8845.97	11095	3315.92	2512.07	9306.07	5670.06	2500.06	3933.82		15103.4	5044.69	4034.65		15103.4	9297.28	15904.6		DDR48	0.615576	0.142145	0.180252	1.05305	0.105092	0.0810953
DFG5		269.094	632.52	279.292	644.844	275.765	94.0385	177.1	172.609	370.066	72.5848	93.0595	124.923		293.963	764.385	279.292	715.613	364.049	226.618	195.613	215.445	370.066	180.068	93.0595	187.859		440.653	260.375	153.662		440.653	479.867	605.736		DFG5	1.08899	0.256356	0.245475	1.37463	0.0842634	0.0667366
ECE1		179799	114509	193992	122733	151346	73162	1728.1	1119.61	929.066	4436.58	12764.1	12946.9		196416	138381	193992	136202	199798	176309	1908.74	1397.46	929.066	11006.2	12764.1	19469.6		173516	1411.76	14413.3		173516	2601.84	56817.1		ECE1	0.0149948	2.35508e-05	0.000813973	0.327445	4.05893e-05	0.00100459
ECM331		1322.09	1807.52	1346.29	1962.84	1303.76	819.039	228.1	139.609	464.066	218.585	531.06	528.923		1444.28	2184.34	1346.29	2178.26	1721.16	1973.76	251.944	174.256	464.066	542.263	531.06	795.394		1808.01	296.755	622.905		1808.01	546.915	2455.49		ECM331	0.302495	0.000267864	0.00297101	1.35812	0.0011415	0.00452035
EFG1		664.094	1408.52	718.292	1477.84	1156.76	438.039	669.1	598.609	909.066	332.585	816.06	470.923		725.468	1702.16	718.292	1640.03	1527.1	1055.61	739.043	747.164	909.066	825.073	816.06	708.174		1228.11	798.424	783.102		1228.11	1471.48	3086.99		EFG1	1.19817	0.159693	0.186449	2.51361	0.145643	0.0993248
ELF1		125.094	103.52	156.292	124.844	112.765	36.0385	132.1	128.609	188.066	28.5848	77.0595	81.9232		136.655	125.102	156.292	138.545	148.866	86.8473	145.909	160.526	188.066	70.9129	77.0595	123.196		132.051	164.834	90.3895		132.051	303.786	356.315		ELF1	2.30052	0.0916665	0.137088	2.69831	0.0563151	0.0526346
ENA2		1303.09	1418.52	1430.29	1582.84	1605.76	982.039	815.1	1173.61	1677.07	126.585	484.06	236.923		1423.52	1714.25	1430.29	1756.55	2119.84	2366.56	900.305	1464.86	1677.07	314.03	484.06	356.285		1801.84	1347.41	384.792		1801.84	2483.26	1516.85		ENA2	1.37818	0.138307	0.178725	0.841834	0.000436623	0.00252296
ENA21		2159.09	3905.52	2424.29	4270.84	2266.76	1050.04	2288.1	1696.61	4587.07	627.585	1179.06	1558.92		2358.63	4719.72	2424.29	4739.55	2992.45	2530.43	2527.28	2117.65	4587.07	1556.91	1179.06	2344.31		3294.18	3077.33	1693.42		3294.18	5671.48	6675.47		ENA21	1.72167	0.804217	0.591388	2.02644	0.0598672	0.0543748
FAV2		166.094	116.52	170.292	93.8437	125.765	26.0385	4.10041	3.60928	35.0657	30.5848	57.0595	67.9232		181.444	140.812	170.292	104.143	166.028	62.7488	4.52904	4.50498	35.0657	75.8745	57.0595	102.143		137.578	14.6999	78.3589		137.578	27.0917	308.891		FAV2	0.196919	0.003341	0.0148229	2.24521	0.0782373	0.0634767
FBP1		1521.09	1090.52	1716.29	1217.84	924.765	399.039	1304.1	1088.61	1118.07	676.585	712.06	742.923		1661.67	1317.87	1716.29	1351.5	1220.82	961.621	1440.42	1358.77	1118.07	1678.46	712.06	1117.21		1371.63	1305.75	1169.24		1371.63	2406.48	4609.16		FBP1	1.75447	0.725082	0.554646	3.36035	0.44312	0.255052
FDH1		1346.09	2555.52	1463.29	2957.84	1938.76	1222.04	3414.1	2447.61	3996.07	593.585	397.06	379.923		1470.5	3088.28	1463.29	3282.45	2559.45	2944.92	3770.99	3055.02	3996.07	1472.56	397.06	571.328		2468.15	3607.36	813.649		2468.15	6648.31	3207.4		FDH1	2.69364	0.0642091	0.11099	1.29952	0.0170112	0.0224459
FGR15		62.094	55.5205	50.2919	56.8437	47.7649	1	44.1004	24.6093	34.0657	8.5848	9.05954	1.92315		67.8326	67.0951	50.2919	63.0821	63.0565	2.40985	48.7103	30.7165	34.0657	21.2971	9.05954	2.89203		52.2947	37.8308	11.0829		52.2947	69.7217	43.6887		FGR15	1.33325	0.382125	0.326031	0.835434	0.0324701	0.0365288
FKH2		133.094	63.5205	115.292	92.8437	53.7649	24.0385	80.1004	49.6093	26.0657	1	11.0595	13.9232		145.394	76.7629	115.292	103.033	70.9773	57.9291	88.4735	61.9207	26.0657	1	11.0595	20.9376		94.8981	58.82	10.9991		94.8981	108.404	43.3582		FKH2	1.14232	0.157179	0.185138	0.456893	0.00387134	0.0083318
FRP1		1156.09	4330.52	1321.29	4775.84	3064.76	1018.04	3481.1	2445.61	3229.07	937.585	1315.06	935.923		1262.94	5233.33	1321.29	5299.97	4045.93	2453.32	3844.99	3052.53	3229.07	2325.95	1315.06	1407.44		3269.46	3375.53	1682.82		3269.46	6221.05	6633.66		FRP1	1.90277	0.926904	0.663285	2.02898	0.201023	0.125165
FRP2		493.094	2073.52	501.292	2195.84	504.765	275.039	487.1	289.609	1068.07	461.585	585.06	607.923		538.665	2505.8	501.292	2436.83	666.362	662.8	538.018	361.481	1068.07	1145.09	585.06	914.194		1218.62	655.855	881.449		1218.62	1208.73	3474.67		FRP2	0.991881	0.3778	0.325505	2.85131	0.586173	0.326018
FRP3		1190.09	1491.52	1242.29	1489.84	1033.76	866.039	2268.1	2113.61	1901.07	568.585	650.06	475.923		1300.08	1802.47	1242.29	1653.35	1364.72	2087.02	2505.19	2638.14	1901.07	1410.54	650.06	715.693		1574.99	2348.13	925.43		1574.99	4327.57	3648.04		FRP3	2.74769	0.0168219	0.0410077	2.31624	0.0378912	0.0407743
FTR1		5565.09	9311.52	6044.29	10192.8	8183.76	3451.04	9046.1	6253.61	8579.07	2726.58	3993.06	3933.92		6079.41	11252.7	6044.29	11311.5	10803.7	8316.47	9991.71	7805.55	8579.07	6764.08	3993.06	5915.83		8968.02	8792.11	5557.66		8968.02	16203.7	21908.3		FTR1	1.80683	0.913112	0.656947	2.44293	0.0692476	0.0611876
GAL1		7377.09	3094.52	7823.29	3351.84	6504.76	3427.04	4379.1	3665.61	3776.07	588.585	2113.06	931.923		8058.87	3739.65	7823.29	3719.69	8587.22	8258.63	4836.86	4575.29	3776.07	1460.16	2113.06	1401.42		6697.89	4396.07	1658.21		6697.89	8101.89	6536.67		GAL1	1.20962	0.143617	0.180252	0.97593	0.00845214	0.013946
GAL4		758.094	744.52	821.292	850.844	616.765	438.039	587.1	465.609	911.066	62.5848	214.06	120.923		828.155	899.734	821.292	944.22	814.218	1055.61	648.472	581.158	911.066	155.26	214.06	181.844		893.871	713.565	183.721		893.871	1315.09	724.228		GAL4	1.47123	0.0763433	0.125448	0.810216	5.2802e-06	0.00026137
GAP2		327.094	1032.52	398.292	1134.84	542.765	528.039	1705.1	1516.61	1471.07	363.585	367.06	312.923		357.323	1247.78	398.292	1259.39	716.527	1272.49	1883.34	1892.98	1471.07	901.977	367.06	470.573		875.3	1749.13	579.87		875.3	3223.62	2285.85		GAP2	3.68287	0.0162753	0.0408726	2.6115	0.332191	0.195756
GCA2		1561.09	385.52	1629.29	395.844	417.765	326.039	564.1	542.609	841.066	66.5848	271.06	80.9232		1705.37	465.892	1629.29	439.286	551.509	785.702	623.067	677.267	841.066	165.183	271.06	121.692		929.508	713.8	185.978		929.508	1315.52	733.126		GCA2	1.41529	0.559553	0.445967	0.788724	0.0717345	0.0622957
GCN4		2526.09	2770.52	2607.29	2791.84	2439.76	1283.04	3837.1	2634.61	3569.07	397.585	1370.06	1128.92		2759.55	3348.11	2607.29	3098.24	3220.84	3091.92	4238.2	3288.43	3569.07	986.324	1370.06	1697.67		3020.99	3698.57	1351.35		3020.99	6816.4	5327.03		GCN4	2.25635	0.0300931	0.0606878	1.76334	0.000112219	0.00100997
GIS2		748.094	361.52	825.292	384.844	539.765	273.039	1135.1	1005.61	932.066	223.585	313.06	316.923		817.231	436.888	825.292	427.079	712.567	657.981	1253.76	1255.17	932.066	554.667	313.06	476.589		646.173	1147	448.105		646.173	2113.9	1766.43		GIS2	3.27141	0.00565235	0.0196619	2.73368	0.131243	0.0931955
GNP1		12312.1	6378.52	14128.3	6951.84	9610.76	5358.04	6483.1	6539.61	5933.07	616.585	1712.06	1357.92		13449.9	7708.28	14128.3	7714.78	12687.6	12912	7160.8	8162.52	5933.07	1529.62	1712.06	2042.04		11433.5	7085.46	1761.24		11433.5	13058.4	6942.8		GNP1	1.14212	0.0462599	0.0855166	0.607234	0.000884191	0.00416833
GPD2		399.094	176.52	467.292	177.844	499.765	246.039	220.1	190.609	210.066	80.5848	333.06	176.923		435.977	213.321	467.292	197.361	659.761	592.915	243.108	237.912	210.066	199.914	333.06	266.057		427.771	230.362	266.343		427.771	424.554	1049.93		GPD2	0.992478	0.12737	0.167852	2.45441	0.209088	0.12857
HAC1		605.094	740.52	593.292	826.844	645.765	237.039	322.1	278.609	574.066	223.585	398.06	384.923		661.015	894.901	593.292	917.586	852.502	571.226	355.77	347.751	574.066	554.667	398.06	578.847		748.42	425.862	510.524		748.42	784.858	2012.49		HAC1	1.04869	0.0186864	0.0428821	2.68898	0.0509656	0.0508174
HAP2		184.094	324.52	189.292	393.844	468.765	171.039	445.1	318.609	547.066	160.585	292.06	222.923		201.108	392.175	189.292	437.066	618.837	412.176	491.628	397.678	547.066	398.377	292.06	335.232		375.109	478.79	341.889		375.109	882.403	1347.73		HAP2	2.35239	0.336098	0.296139	3.59289	0.745451	0.403277
HAP3		29.094	56.5205	26.2919	66.8437	41.7649	8.03852	88.1004	43.6093	117.066	1.5848	12.0595	12.9232		31.7828	68.3036	26.2919	74.1796	55.1356	19.3716	97.3098	54.4317	117.066	3.93157	12.0595	19.4338		45.8442	89.6024	11.8083		45.8442	165.136	46.5483		HAP3	3.60211	0.0487476	0.0888808	1.01536	0.0468446	0.0475635
HAP43		229.094	357.52	307.292	379.844	501.765	228.039	556.1	377.609	661.066	195.585	309.06	300.923		250.266	432.055	307.292	421.53	662.401	549.538	614.231	471.319	661.066	485.205	309.06	452.528		437.18	582.205	415.597		437.18	1073	1638.28		HAP43	2.45435	0.183184	0.198911	3.74739	0.831066	0.444732
HEM1		161.094	115.52	159.292	152.844	187.765	45.0385	212.1	176.609	206.066	32.5848	75.0595	128.923		175.982	139.604	159.292	169.618	247.877	108.536	234.272	220.438	206.066	80.836	75.0595	193.874		166.818	220.258	116.59		166.818	405.933	459.598		HEM1	2.43339	0.10144	0.145179	2.75509	0.223809	0.136772
HGT7		10475.1	3268.52	10598.3	3506.84	8920.76	4072.04	17942.1	14299.6	12642.1	309.585	2211.06	1211.92		11443.2	3949.93	10598.3	3891.71	11776.7	9812.98	19817.6	17848.3	12642.1	768.015	2211.06	1822.49		8578.79	16769.3	1600.52		8578.79	30905.6	6309.25		HGT7	3.60256	0.0162521	0.0408726	0.735447	0.0160673	0.0214954
HOG1		211.094	396.52	234.292	434.844	172.765	74.0385	108.1	79.6093	165.066	81.5848	96.0595	115.923		230.603	479.185	234.292	482.566	228.074	178.421	119.4	99.3657	165.066	202.395	96.0595	174.325		305.524	127.944	157.593		305.524	235.799	621.232		HOG1	0.771786	0.0698721	0.117721	2.03333	0.124189	0.0892918
HSP104		8048.09	2518.52	9155.29	2670.84	4472.76	3800.04	25920.1	27036.6	22143.1	942.585	3880.06	1152.92		8791.88	3043.57	9155.29	2963.96	5904.69	9157.51	28629.6	33746.2	22143.1	2338.35	3880.06	1733.76		6502.82	28173	2650.73		6502.82	51922.3	10449.2		HSP104	7.98459	0.000119316	0.0018492	1.60687	0.0726886	0.0623267
HSP70		10830.1	6390.52	12551.3	7130.84	4478.76	3663.04	19203.1	22286.6	18086.1	1217.58	4535.06	2066.92		11831	7722.78	12551.3	7913.42	5912.61	8827.36	21210.5	27817.4	18086.1	3020.57	4535.06	3108.24		9126.41	22371.3	3554.62		9126.41	41230	14012.3		HSP70	4.51766	0.000942249	0.00660071	1.53536	0.00925521	0.0147785
HTA1		4114.09	4302.52	4320.29	4824.84	4038.76	2070.04	1411.1	1217.61	3141.07	551.585	1262.06	791.923		4494.31	5199.49	4320.29	5354.35	5331.75	4988.47	1558.61	1519.78	3141.07	1368.37	1262.06	1190.89		4948.11	2073.15	1273.77		4948.11	3820.78	5021.21		HTA1	0.77217	0.000315713	0.0030015	1.01477	2.48138e-06	0.000245657
HTA2		1216.09	1544.52	1394.29	1625.84	1288.76	715.039	481.1	394.609	1176.07	247.585	520.06	394.923		1328.48	1866.51	1394.29	1804.27	1701.35	1723.13	531.391	492.538	1176.07	614.206	520.06	593.885		1636.34	733.332	576.05		1636.34	1351.52	2270.79		HTA2	0.825939	0.00250394	0.0119027	1.38772	9.75535e-05	0.00100997
HWP1		39715.1	43402.5	42031.3	48826.8	25640.8	14473	398.1	222.609	401.066	1370.58	2983.06	2540.92		43385.5	52450.9	42031.3	54185.4	33849.5	34877.8	439.715	277.853	401.066	3400.13	2983.06	3821.04		43463.4	372.878	3401.41		43463.4	687.208	13408.3		HWP1	0.0158112	6.40983e-05	0.00121878	0.308498	0.000102527	0.00100997
HYR1		6385.09	18549.5	7065.29	20574.8	3514.76	1656.04	79.1004	49.6093	140.066	218.585	305.06	258.923		6975.19	22416.6	7065.29	22832.8	4639.99	3990.8	87.369	61.9207	140.066	542.263	305.06	389.368		11320.1	96.4518	412.23		11320.1	177.759	1625.01		HYR1	0.0157029	0.0713228	0.118663	0.143551	0.0779089	0.0634767
IFD6		512.094	605.52	538.292	666.844	140.765	100.039	244.1	411.609	970.066	1	1	1		559.42	731.756	538.292	740.027	185.83	241.077	269.617	513.757	970.066	1	1	1		499.401	584.48	1		499.401	1077.19	3.942		IFD6	2.15696	0.676471	0.523478	0.00789346	0.00984197	0.0152041
IHD1		4548.09	8534.52	5150.29	9013.84	5327.76	1973.04	288.1	247.609	178.066	1189.58	5366.06	3898.92		4968.42	10313.8	5150.29	10003.1	7033.41	4754.72	318.216	309.058	178.066	2951.11	5366.06	5863.2		7037.28	268.447	4726.79		7037.28	494.743	18633		IHD1	0.0703032	0.00302175	0.0138688	2.64775	0.200556	0.125165
INO4		95.094	168.52	82.2919	192.844	112.765	40.0385	68.1004	70.6093	61.0657	2.5848	11.0595	29.9232		103.882	203.653	82.2919	214.008	148.866	96.4866	75.2191	88.1322	61.0657	6.41236	11.0595	44.9984		141.531	74.8057	20.8234		141.531	137.866	82.0859		INO4	0.974101	0.0929393	0.137447	0.579985	0.0105039	0.0155206
IRE1		211.094	318.52	214.292	347.844	340.765	184.039	168.1	87.6093	207.066	34.5848	111.06	87.9232		230.603	384.924	214.292	386.018	449.858	443.504	185.672	109.351	207.066	85.7976	111.06	132.219		351.533	167.363	109.692		351.533	308.447	432.405		IRE1	0.877435	0.0252978	0.0534466	1.23006	0.00621556	0.0110083
IRO1		431.094	610.52	545.292	673.844	578.765	274.039	99.1004	80.6093	100.066	108.585	249.06	261.923		470.935	737.799	545.292	747.795	764.052	660.391	109.46	100.614	100.066	269.376	249.06	393.88		654.377	103.38	304.105		654.377	190.527	1198.78		IRO1	0.291158	0.00012504	0.0018492	1.83194	0.00286764	0.00692431
KIP4		996.094	1533.52	1092.29	1671.84	812.765	456.039	263.1	181.609	148.066	218.585	650.06	416.923		1088.15	1853.22	1092.29	1855.32	1072.97	1098.98	290.603	226.679	148.066	542.263	650.06	626.968		1343.49	221.782	606.43		1343.49	408.742	2390.55		KIP4	0.304239	0.00217693	0.01159	1.77936	0.0172312	0.0224459
KRE1		449.094	550.52	460.292	640.844	750.765	350.039	238.1	156.609	199.066	104.585	437.06	244.923		490.598	665.29	460.292	711.174	991.117	843.539	262.99	195.474	199.066	259.453	437.06	368.315		693.668	219.177	354.943		693.668	403.939	1399.18		KRE1	0.582323	0.00614477	0.0204467	2.01708	0.0315798	0.0359357
MAC1		87.094	194.52	85.2919	224.844	72.7649	23.0385	25.1004	22.6093	50.0657	1	29.0595	19.9232		95.143	235.073	85.2919	249.519	96.0601	55.5193	27.7242	28.2202	50.0657	2.48079	29.0595	29.9604		136.101	35.3367	20.5002		136.101	65.125	80.8119		MAC1	0.478504	0.0849208	0.130862	0.593764	0.055349	0.0526346
MAE1		751.094	1056.52	893.292	1219.84	526.765	285.039	753.1	624.609	701.066	46.5848	168.06	105.923		820.508	1276.78	893.292	1353.72	695.405	686.899	831.824	779.617	701.066	115.567	168.06	159.287		954.433	770.835	147.638		954.433	1420.64	581.988		MAE1	1.48846	0.330864	0.295557	0.609774	0.00240012	0.00639605
MBF1		1739.09	1864.52	2072.29	2030.84	1920.76	1033.04	2055.1	1682.61	2050.07	732.585	1369.06	1224.92		1899.82	2253.23	2072.29	2253.72	2535.68	2489.46	2269.93	2100.18	2050.07	1817.39	1369.06	1842.04		2250.7	2140.06	1676.16		2250.7	3944.09	6607.43		MBF1	1.75238	0.487867	0.400834	2.93572	0.0138729	0.0193438
MDM34		10184.1	6119.52	10903.3	6895.84	10397.8	5753.04	6666.1	5525.61	5320.07	702.585	2680.06	881.923		11125.3	7395.29	10903.3	7652.63	13726.5	13863.9	7362.93	6896.88	5320.07	1742.97	2680.06	1326.23		10777.8	6526.62	1916.42		10777.8	12028.5	7554.52		MDM34	1.11604	0.0435515	0.08281	0.700932	0.00124152	0.00457567
MET28		612.094	560.52	627.292	608.844	513.765	205.039	822.1	702.609	1048.07	200.585	477.06	404.923		668.662	677.375	627.292	675.662	678.243	494.111	908.037	876.974	1048.07	497.609	477.06	608.923		636.891	944.359	527.864		636.891	1740.44	2080.84		MET28	2.73271	0.000859174	0.00635308	3.26718	0.0698403	0.0611876
NDT80		604.094	555.52	717.292	583.844	841.765	278.039	757.1	599.609	553.066	104.585	240.06	164.923		659.923	671.333	717.292	647.918	1111.25	670.03	836.242	748.412	553.066	259.453	240.06	248.011		746.291	712.573	249.175		746.291	1313.26	982.245		NDT80	1.75972	0.788387	0.582968	1.31617	0.00245505	0.00639605
NPR1		163.094	138.52	187.292	141.844	215.765	88.0385	160.1	138.609	140.066	30.5848	85.0595	51.9232		178.167	167.399	187.292	157.411	284.841	212.159	176.836	173.007	140.066	75.8745	85.0595	78.082		197.878	163.303	79.672		197.878	300.965	314.067		NPR1	1.52096	0.269714	0.252809	1.58717	0.0038389	0.0083318
NRG1		1078.09	441.52	1194.29	482.844	2343.76	956.039	2946.1	2889.61	3053.07	1	1	1		1177.73	533.566	1194.29	535.834	3094.1	2303.91	3254.06	3606.71	3053.07	1	1	1		1473.24	3304.61	1		1473.24	6090.35	1		NRG1	4.13399	0.0214532	0.0460551	0.000678777	0.0470831	0.0475635
PCK1		18953.1	11821.5	20346.3	12848.8	14040.8	6109.04	6013.1	4908.61	5346.07	1841.58	4718.06	3061.92		20704.7	14286	20346.3	14259	18535.8	14721.8	6641.67	6126.76	5346.07	4568.58	4718.06	4604.52		17142.3	6038.16	4630.39		17142.3	11128.2	18253		PCK1	0.64917	0.000546648	0.00427995	1.06479	0.000250631	0.00177232
PES1		1.09399	1	4.29192	7.84374	3.76489	1	1	1	1	1	1	1		1.19509	1.20848	4.29192	8.70456	4.9702	2.40985	1	1	1	1	1	1		3.79668	1	1		3.79668	1	1		PES1	0.48542	0.146647	0.180252	0.263388	0.146647	0.0993248
PFK2		2216.09	1424.52	2526.29	1551.84	3072.76	1403.04	2151.1	2034.61	1683.07	316.585	1427.06	539.923		2420.9	1721.5	2526.29	1722.15	4056.49	3381.11	2375.96	2539.53	1683.07	785.38	1427.06	811.936		2638.07	2199.52	1008.13		2638.07	4053.68	3974.03		PFK2	1.53661	0.474541	0.392307	1.50641	0.0245471	0.029279
PGA13		1301.09	5552.52	1436.29	5929.84	1844.76	1050.04	412.1	230.609	686.066	921.585	2145.06	1423.92		1421.34	6710.08	1436.29	6580.62	2435.35	2530.43	455.178	287.839	686.066	2286.26	2145.06	2141.29		3519.02	476.361	2190.87		3519.02	877.926	8636.41		PGA13	0.24948	0.0783016	0.125566	2.45421	0.397811	0.231666
PGA17		4.09399	46.5205	18.2919	60.8437	90.7649	33.0385	119.1	50.6093	51.0657	1	1	1		4.47234	56.2188	18.2919	67.5211	119.823	79.6177	131.55	63.1688	51.0657	1	1	1		57.6574	81.9283	1		57.6574	150.993	1		PGA17	2.61879	0.44497	0.372487	0.0173438	0.0586143	0.0537298
PGA25		8.09399	32.5205	9.29192	39.8437	67.7649	38.0385	70.1004	21.6093	4.06572	1	1	1		8.84201	39.3002	9.29192	44.2164	89.4594	91.667	77.4282	26.972	4.06572	1	1	1		47.1295	36.1553	1		47.1295	66.6337	1		PGA25	1.41384	0.68711	0.528638	0.0212181	0.0736588	0.0623267
PGA34		795.094	786.52	847.292	863.844	1013.76	458.039	268.1	186.609	181.066	14.5848	115.06	38.9232		868.575	950.49	847.292	958.647	1338.31	1103.8	296.126	232.919	181.066	36.1818	115.06	58.5326		1011.19	236.704	69.9247		1011.19	436.241	275.643		PGA34	0.431415	0.000229276	0.00277429	0.272593	6.27772e-05	0.00100997
PGA37		86.094	160.52	112.292	178.844	149.765	34.0385	24.1004	48.6093	45.0657	1	1	1		94.0506	193.985	112.292	198.471	197.711	82.0276	26.6197	60.6725	45.0657	1	1	1		146.423	44.1193	1		146.423	81.3112	1		PGA37	0.555317	0.0198301	0.0435169	0.00682953	0.00336042	0.00792098
PGA48		5280.09	2991.52	5297.29	3195.84	4568.76	3080.04	1847.1	1375.61	1217.07	183.585	639.06	357.923		5768.07	3615.18	5297.29	3546.57	6031.42	7422.42	2040.18	1716.99	1217.07	455.435	639.06	538.244		5280.16	1658.08	544.246		5280.16	3055.81	2145.42		PGA48	0.578735	0.00522904	0.0196619	0.406317	0.00112565	0.00452035
PGA53		200.094	373.52	241.292	479.844	90.7649	56.0385	295.1	242.609	641.066	12.5848	39.0595	19.9232		218.586	451.39	241.292	532.505	119.823	135.044	325.948	302.817	641.066	31.2203	39.0595	29.9604		283.107	423.277	33.4134		283.107	780.093	131.716		PGA53	2.75547	0.296747	0.270528	0.465251	0.0439154	0.0457645
PGA7		1374.09	6978.52	1615.29	7515.84	3021.76	1477.04	2724.1	1828.61	2664.07	761.585	1019.06	899.923		1501.08	8433.37	1615.29	8340.68	3989.16	3559.43	3008.86	2282.41	2664.07	1889.33	1019.06	1353.3		4573.17	2651.78	1420.56		4573.17	4887.19	5599.86		PGA7	1.06866	0.33819	0.296139	1.2245	0.135953	0.0947841
PHO89		846.094	1782.52	903.292	1989.84	924.765	654.039	508.1	357.609	323.066	335.585	880.06	602.923		924.288	2154.13	903.292	2208.22	1220.82	1576.13	561.214	446.356	323.066	832.515	880.06	906.675		1497.81	443.545	873.083		1497.81	817.447	3441.69		PHO89	0.54576	0.0199439	0.0435169	2.29781	0.116414	0.0865059
PHR1		3664.09	7632.52	4072.29	8429.84	3667.76	1892.04	377.1	435.609	876.066	700.585	1448.06	1471.92		4002.72	9223.71	4072.29	9354.98	4841.97	4559.52	416.52	543.713	876.066	1738	1448.06	2213.48		6009.2	612.099	1799.85		6009.2	1128.09	7094.99		PHR1	0.187727	0.00970584	0.0280836	1.18069	0.0289636	0.033734
PHR2		737.094	988.52	851.292	1084.84	996.765	367.039	1107.1	815.609	1901.07	519.585	704.06	635.923		805.214	1194.6	851.292	1203.9	1315.87	884.506	1222.83	1018.02	1901.07	1288.98	704.06	956.3		1042.56	1380.64	983.114		1042.56	2544.49	3875.43		PHR2	2.44061	0.165893	0.188721	3.71721	0.739677	0.402352
PIL1		5738.09	7381.52	6175.29	7946.84	2253.76	1895.04	2607.1	2121.61	5714.07	814.585	878.06	1092.92		6268.39	8920.38	6175.29	8818.98	2975.29	4566.75	2879.63	2648.12	5714.07	2020.81	878.06	1643.54		6287.52	3747.27	1514.14		6287.52	6906.16	5968.72		PIL1	1.09839	0.142578	0.180252	0.949298	0.0117987	0.0166867
PIR1		7471.09	1993.52	8155.29	2080.84	3470.76	2936.04	6627.1	6667.61	8381.07	1227.58	3030.06	1210.92		8161.55	2409.12	8155.29	2309.21	4581.91	7075.4	7319.85	8322.29	8381.07	3045.38	3030.06	1820.98		5448.75	8007.73	2632.14		5448.75	14758.1	10375.9		PIR1	2.70854	0.163777	0.18792	1.90427	0.131792	0.0931955
PLB5		231.094	408.52	263.292	427.844	371.765	129.039	155.1	114.609	158.066	76.5848	195.06	297.923		252.451	493.687	263.292	474.798	490.783	310.963	171.313	143.051	158.066	189.991	195.06	448.016		380.996	157.477	277.689		380.996	290.227	1094.65		PLB5	0.761761	0.0155235	0.0405134	2.87313	0.286707	0.170988
POL1		61.094	130.52	70.2919	119.844	49.7649	24.0385	1	1	1	3.5848	16.0595	19.9232		66.7401	157.731	70.2919	132.996	65.6968	57.9291	1	1	1	8.89315	16.0595	29.9604		91.8975	1	18.3044		91.8975	1	72.1558		POL1	0.0200548	0.00882871	0.0261134	0.785177	0.0239241	0.028884
PRA1		2050.09	23608.5	2497.29	26134.8	1580.76	1155.04	721.1	349.609	1538.07	468.585	802.06	878.923		2239.56	28530.3	2497.29	29003	2086.84	2783.46	796.479	436.371	1538.07	1162.46	802.06	1321.72		11190.1	923.638	1095.41		11190.1	1702.25	4318.12		PRA1	0.152121	0.247675	0.245475	0.385888	0.254814	0.153821
RBR1		90.094	84.5205	129.292	73.8437	162.765	40.0385	51.1004	18.6093	75.0657	34.5848	48.0595	55.9232		98.4203	102.141	129.292	81.9478	214.873	96.4866	56.4421	23.2275	75.0657	85.7976	48.0595	84.0972		120.527	51.5784	72.6514		120.527	95.0582	286.392		RBR1	0.78869	0.0599729	0.106432	2.37617	0.157078	0.102307
RBR2		57.094	116.52	50.2919	147.844	156.765	116.039	155.1	105.609	233.066	46.5848	46.0595	11.9232		62.3705	140.812	50.2919	164.069	206.952	279.635	171.313	131.818	233.066	115.567	46.0595	17.93		150.688	178.732	59.8522		150.688	329.401	235.937		RBR2	2.18597	0.628999	0.492469	1.56573	0.145217	0.0993248
RBT1		42.094	25.5205	58.2919	32.8437	22.7649	6.03852	1	1	1	1	1	1		45.9842	30.8408	58.2919	36.4482	30.0529	14.5519	1	1	1	1	1	1		36.0283	1	1		36.0283	1	1		RBT1	0.0511538	0.00576118	0.0196619	0.0277559	0.00576118	0.0107615
RBT5		6645.09	37538.5	7578.29	39023.8	13588.8	7244.04	10739.1	6916.61	13677.1	3354.58	4605.06	3776.92		7259.22	45364.4	7578.29	43306.6	17939.1	17457	11861.7	8633.08	13677.1	8322.02	4605.06	5679.73		23150.8	11390.6	6202.27		23150.8	20992.7	24449.3		RBT5	0.906783	0.288414	0.264744	1.05609	0.141134	0.0977084
RCT1		3097.09	9731.52	3670.29	10665.8	3910.76	2104.04	1895.1	1467.61	3878.07	1114.58	1735.06	2030.92		3383.32	11760.3	3670.29	11836.4	5162.77	5070.41	2093.2	1831.82	3878.07	2765.05	1735.06	3054.1		6813.91	2601.03	2518.07		6813.91	4793.66	9926.23		RCT1	0.70351	0.120579	0.163766	1.45676	0.111708	0.0837809
RFG1		576.094	758.52	555.292	782.844	506.765	253.039	1064.1	777.609	830.066	144.585	247.06	266.923		629.335	916.653	555.292	868.758	669.002	609.784	1175.33	970.586	830.066	358.684	247.06	401.399		708.137	991.995	335.714		708.137	1828.23	1323.38		RFG1	2.58175	0.0368278	0.072085	1.86883	0.00534284	0.0103714
RFX2		277.094	355.52	294.292	413.844	239.765	99.0385	7.10041	1	21.0657	56.5848	240.06	138.923		302.702	429.638	294.292	459.261	316.524	238.668	7.84264	1	21.0657	140.375	240.06	208.912		340.181	9.96945	196.449		340.181	18.3735	774.401		RFX2	0.0540111	0.000352369	0.0031267	2.27644	0.0338277	0.0372104
RHR2		1739.09	752.52	2011.29	852.844	1211.76	544.039	530.1	406.609	562.066	553.585	879.06	1014.92		1899.82	909.402	2011.29	946.44	1599.7	1311.05	585.513	507.516	562.066	1373.33	879.06	1526.24		1446.28	551.698	1259.54		1446.28	1016.77	4965.11		RHR2	0.703024	0.0154937	0.0405134	3.43301	0.564248	0.315596
RIM101		7090.09	4789.52	8296.29	4943.84	7170.76	3828.04	3282.1	3193.61	3207.07	445.585	1540.06	676.923		7745.34	5788.02	8296.29	5486.41	9466.44	9224.98	3625.19	3986.16	3207.07	1105.4	1540.06	1017.96		7667.91	3606.14	1221.14		7667.91	6646.05	4813.73		RIM101	0.866736	0.00539438	0.0196619	0.627776	0.000391702	0.00242366
RNR22		5482.09	3580.52	6264.29	3989.84	4644.76	2301.04	1868.1	1804.61	2223.07	208.585	1568.06	615.923		5988.74	4326.97	6264.29	4427.71	6131.75	5545.15	2063.38	2252.45	2223.07	517.455	1568.06	926.224		5447.44	2179.63	1003.91		5447.44	4017.03	3957.42		RNR22	0.737416	0.00040008	0.00332817	0.726474	8.94832e-05	0.00100997
ROB1		354.094	395.52	392.292	418.844	293.765	174.039	295.1	264.609	338.066	38.5848	95.0595	169.923		386.818	477.977	392.292	464.81	387.812	419.406	325.948	330.277	338.066	95.7208	95.0595	255.53		421.519	331.43	148.77		421.519	610.821	586.452		ROB1	1.44909	0.00773655	0.02501	1.39128	0.000364229	0.00240391
RPN4		479.094	351.52	522.292	361.844	512.765	276.039	1914.1	1735.61	1653.07	392.585	1065.06	614.923		523.371	424.804	522.292	401.555	676.923	665.21	2114.19	2166.33	1653.07	973.92	1065.06	924.721		535.692	1977.86	987.9		535.692	3645.17	3894.3		RPN4	6.80459	9.35586e-06	0.000622635	7.26966	0.000501579	0.00252296
RTA3		7.09399	14.5205	21.2919	2.84374	1.76489	1	1	1	1	1	1	1		7.74959	17.5476	21.2919	3.15583	2.32991	2.40985	1	1	1	1	1	1		9.08079	1	1		1.45663	1	1		RTA3	0.202954	0.148968	0.180252	0.686518	0.148968	0.0993248
SAP1		79.094	75.5205	67.2919	61.8437	52.7649	12.0385	1	1	1	1	1	1		86.4037	91.2646	67.2919	68.6308	69.6572	29.011	1	1	1	1	1	1		68.7099	1	1		68.7099	1	1		SAP1	0.0268227	0.00129413	0.00782611	0.014554	0.00129413	0.00457567
SAP10		8.09399	22.5205	13.2919	25.8437	14.7649	1	12.1004	5.60928	18.0657	1	1	1		8.84201	27.2154	13.2919	28.68	19.4918	2.40985	13.3653	7.00132	18.0657	1	1	1		16.6552	12.8108	1		10.2223	23.6101	1		SAP10	1.41758	0.575834	0.456211	0.0978251	0.0396937	0.0422546
SAP2		6.09399	1.52046	4.29192	9.84374	1	1	1	1	1	1	1	1		6.65718	1.83743	4.29192	10.9241	1.32014	2.40985	1	1	1	1	1	1		4.57343	1	1		1.28833	1	1		SAP2	0.402976	0.147681	0.180252	0.776198	0.147681	0.0993248
SAP4		2636.09	2643.52	2649.29	2853.84	2222.76	562.039	1	1	1	137.585	112.06	41.9232		2879.72	3194.63	2649.29	3167.04	2934.37	1354.43	1	1	1	341.319	112.06	63.044		2696.58	1	172.141		2696.58	1	678.579		SAP4	0.000683453	0.000315539	0.0030015	0.251644	0.000496951	0.00252296
SAP5		8826.09	13279.5	9586.29	14592.8	8715.76	2864.04	87.1004	78.6093	114.066	1243.58	1020.06	1544.92		9641.78	16048	9586.29	16194.3	11506.1	6901.89	96.2053	98.1175	114.066	3085.07	1020.06	2323.25		11646.4	102.796	2142.8		11646.4	189.452	8446.89		SAP5	0.016267	0.00135159	0.00782611	0.72528	0.00423647	0.00873773
SAP6		2719.09	2945.52	2925.29	3304.84	1271.76	405.039	1	1	1	86.5848	20.0595	28.9232		2970.39	3559.59	2925.29	3667.54	1678.91	976.08	1	1	1	214.799	20.0595	43.4946		2629.63	1	92.7843		2629.63	1.84298	365.755		SAP6	0.000700853	0.00463273	0.0190553	0.13909	0.00560905	0.0106788
SAP9		2890.09	3583.52	3193.29	3925.84	3883.76	1905.04	2046.1	1560.61	2961.07	476.585	1324.06	843.923		3157.19	4330.6	3193.29	4356.69	5127.13	4590.85	2259.98	1947.9	2961.07	1182.31	1324.06	1269.09		4125.96	2389.65	1258.49		4125.96	4404.09	4960.95		SAP9	1.06741	0.0115103	0.031917	1.20237	0.000509689	0.00252296
SCW11		224.094	85.5205	237.292	121.844	192.765	94.0385	149.1	111.609	156.066	1	1	1		244.804	103.349	237.292	135.216	254.477	226.618	164.686	139.307	156.066	1	1	1		200.293	153.353	1		200.293	282.627	1		SCW11	1.41107	0.26427	0.249463	0.00499269	0.00126145	0.00457567
SCW4		35.094	73.5205	26.2919	93.8437	123.765	70.0385	194.1	102.609	75.0657	1	1	1		38.3373	88.8476	26.2919	104.143	163.387	168.782	214.39	128.073	75.0657	1	1	1		98.2982	139.176	1		98.2982	256.5	1		SCW4	2.60941	0.391069	0.331537	0.0101731	0.0304009	0.0349964
SEF1		311.094	274.52	342.292	308.844	649.765	269.039	269.1	180.609	268.066	132.585	344.06	279.923		339.845	331.751	342.292	342.738	857.783	648.341	297.23	225.43	268.066	328.915	344.06	420.948		477.125	263.575	364.641		477.125	485.766	1437.41		SEF1	1.01811	0.156214	0.185138	3.01266	0.432364	0.250316
SEF2		143.094	239.52	132.292	248.844	238.765	68.0385	422.1	234.609	319.066	95.5848	152.06	145.923		156.318	289.455	132.292	276.153	315.204	163.962	466.224	292.831	319.066	237.126	152.06	219.439		222.231	359.374	202.875		222.231	662.32	799.732		SEF2	2.98033	0.0542297	0.0975402	3.59866	0.713736	0.390386
SGA1		139.094	112.52	121.292	109.844	194.765	62.0385	51.1004	24.6093	65.0657	108.585	223.06	137.923		151.949	135.978	121.292	121.899	257.118	149.503	56.4421	30.7165	65.0657	269.376	223.06	207.409		156.29	50.7414	233.281		156.29	93.5157	919.595		SGA1	0.598348	0.0118342	0.0321455	5.88391	0.0516801	0.0508174
SIN3		304.094	302.52	389.292	368.844	218.765	119.039	344.1	321.609	346.066	78.5848	140.06	150.923		332.198	365.588	389.292	409.323	288.801	286.864	380.07	401.422	346.066	194.952	140.06	226.958		345.344	375.853	187.323		345.344	692.691	738.428		SIN3	2.0058	0.379063	0.325505	2.13824	0.00272186	0.00673659
SIT1		752.094	2431.52	837.292	2660.84	1630.76	723.039	1239.1	876.609	2046.07	301.585	577.06	731.923		821.601	2938.43	837.292	2952.86	2152.84	1742.41	1368.63	1094.15	2046.07	748.168	577.06	1100.67		1907.57	1502.95	808.631		1907.57	2769.91	3187.62		SIT1	1.45206	0.522023	0.421098	1.67103	0.0999939	0.0785666
SMC2		49.094	83.5205	39.2919	103.844	29.7649	1	3.10041	1	16.0657	1	1	1		53.6311	100.932	39.2919	115.24	39.2939	2.40985	3.4245	1.24817	16.0657	1	1	1		58.4666	6.9128	1		58.4666	12.7402	1		SMC2	0.217905	0.0822696	0.128824	0.0171038	0.0569977	0.0527361
SOD4		243.094	294.52	241.292	364.844	238.765	117.039	360.1	240.609	432.066	300.585	241.06	266.923		265.56	355.921	241.292	404.884	315.204	282.045	397.743	300.32	432.066	745.688	241.06	401.399		310.818	376.71	462.715		310.818	694.27	1824.02		SOD4	2.23369	0.183817	0.198911	5.86847	0.187712	0.118366
SOD5		40524.1	50504.5	45886.3	54901.8	31343.8	18527	2038.1	1268.61	2582.07	2399.58	6789.06	5764.92		44269.2	61033.5	45886.3	60927.1	41378.3	44647.3	2251.15	1583.44	2582.07	5952.87	6789.06	8669.28		49690.3	2138.88	7137.07		49690.3	3941.93	28134.3		SOD5	0.07933	4.37371e-05	0.000970232	0.566194	9.19429e-05	0.00100997
SOD6		1058.09	244.52	1220.29	255.844	1130.76	619.039	400.1	440.609	240.066	71.5848	331.06	60.9232		1155.88	295.497	1220.29	283.922	1492.77	1491.79	441.924	549.954	240.066	177.587	331.06	91.6162		990.025	410.648	200.088		990.025	756.818	788.744		SOD6	0.764443	0.131853	0.172056	0.796692	0.051844	0.0508174
SOG2		115.094	227.52	111.292	217.844	140.765	60.0385	96.1004	111.609	115.066	1	23.0595	40.9232		125.731	274.953	111.292	241.751	185.83	144.684	106.146	139.307	115.066	1	23.0595	61.5402		180.707	120.173	28.5332		180.707	221.477	112.478		SOG2	1.22562	0.173643	0.19566	0.622434	0.00763123	0.0130257
SSB1		1176.09	1355.52	1375.29	1445.84	814.765	331.039	969.1	874.609	1509.07	624.585	705.06	851.923		1284.79	1638.11	1375.29	1604.52	1075.61	797.752	1070.4	1091.66	1509.07	1549.46	705.06	1281.12		1296.01	1223.71	1178.55		1296.01	2255.28	4645.83		SSB1	1.74017	0.744742	0.566429	3.58472	0.655051	0.360278
STF2		36762.1	10997.5	42001.3	12288.8	25707.8	16907	29211.1	27718.6	24004.1	3529.58	11729.1	5225.92		40159.6	13290.2	42001.3	13637.5	33937.9	40743.4	32264.6	34597.4	24004.1	8756.16	11729.1	7858.74		30628.3	30288.7	9447.98		30628.3	55821.6	37243.9		STF2	1.82255	0.968831	0.68958	1.216	0.035562	0.0386883
STP2		3321.09	2612.52	3716.29	2880.84	5152.76	2712.04	2806.1	2261.61	2185.07	410.585	1195.06	659.923		3628.02	3157.17	3716.29	3197	6802.39	6535.59	3099.43	2822.87	2185.07	1018.57	1195.06	992.392		4506.08	2702.45	1068.68		4506.08	4980.58	4212.72		STP2	1.1053	0.12241	0.164573	0.934896	0.0115065	0.0165093
SUT1		236.094	196.52	204.292	211.844	236.765	91.0385	266.1	176.609	202.066	96.5848	110.06	115.923		257.913	237.49	204.292	235.093	312.564	219.389	293.917	220.438	202.066	239.607	110.06	174.325		244.457	238.807	174.664		244.457	440.117	688.524		SUT1	1.80039	0.851976	0.619661	2.81655	0.0747983	0.0627545
TEC1		10612.1	3236.52	11927.3	3676.84	14003.8	7019.04	1525.1	1129.61	709.066	743.585	4186.06	1010.92		11592.8	3911.25	11927.3	4080.36	18487	16914.8	1684.52	1409.94	709.066	1844.68	4186.06	1520.22		11152.3	1267.84	2516.99		11152.3	2336.62	9921.96		TEC1	0.20952	0.0316386	0.0628522	0.889682	0.0536385	0.0515555
TPK1		109.094	119.52	150.292	150.844	373.765	126.039	415.1	285.609	230.066	22.5848	100.06	60.9232		119.176	144.437	150.292	167.398	493.423	303.733	458.492	356.488	230.066	56.0282	100.06	91.6162		229.743	348.349	82.5679		229.743	642.001	325.483		TPK1	2.79443	0.259618	0.246823	1.41672	0.134281	0.0942825
TPK2		418.094	249.52	422.292	301.844	187.765	121.039	247.1	179.609	287.066	48.5848	77.0595	82.9232		456.733	301.539	422.292	334.97	247.877	291.684	272.93	224.182	287.066	120.529	77.0595	124.7		342.516	261.393	107.429		342.516	481.743	423.486		TPK2	1.40648	0.148053	0.180252	1.2364	0.00204785	0.00576667
TPS2		6723.09	5434.52	7851.29	5929.84	5040.76	2397.04	2778.1	3187.61	2494.07	710.585	2485.06	1100.92		7344.43	6567.48	7851.29	6580.62	6654.53	5776.49	3068.5	3978.67	2494.07	1762.81	2485.06	1655.57		6795.81	3180.41	1967.81		6795.81	5861.45	7757.11		TPS2	0.86251	0.000204349	0.0027199	1.14146	1.5838e-05	0.000522654
TRR1		440.094	656.52	578.292	732.844	538.765	154.039	164.1	111.609	325.066	77.5848	108.06	203.923		480.766	793.389	578.292	813.27	711.247	371.209	181.254	139.307	325.066	192.472	108.06	306.659		624.696	215.209	202.397		624.696	396.627	797.848		TRR1	0.634912	0.00833685	0.0258055	1.27718	0.00726353	0.0126156
TRX1		1046.09	1093.52	987.292	1272.84	1023.76	445.039	1351.1	921.609	1542.07	543.585	755.06	1073.92		1142.77	1321.49	987.292	1412.53	1351.52	1072.47	1492.33	1150.32	1542.07	1348.52	755.06	1614.96		1214.68	1394.91	1239.51		1214.68	2570.79	4886.16		TRX1	2.11644	0.208823	0.21546	4.02259	0.902382	0.4803
TTR1		755.094	550.52	813.292	640.844	361.765	176.039	509.1	409.609	788.066	216.585	308.06	400.923		824.878	665.29	813.292	711.174	477.581	424.226	562.318	511.261	788.066	537.301	308.06	602.908		652.74	620.548	482.756		652.74	1143.66	1903.02		TTR1	1.75209	0.787693	0.582968	2.91544	0.187701	0.118366
TUP1		579.094	696.52	611.292	690.844	402.765	194.039	435.1	387.609	458.066	65.5848	135.06	148.923		632.612	841.728	611.292	766.661	531.707	467.603	480.583	483.801	458.066	162.702	135.06	223.95		641.934	474.15	173.904		641.934	873.851	685.529		TUP1	1.36128	0.0867781	0.131252	1.06791	0.000954179	0.00429381
TYE7		9360.09	4005.52	9856.29	4366.84	7906.76	3827.04	5970.1	4989.61	5924.07	949.585	3446.06	1343.92		10225.1	4840.57	9856.29	4846.09	10438.1	9222.57	6594.17	6227.86	5924.07	2355.72	3446.06	2020.99		8238.12	6248.7	2607.59		8238.12	11516.3	10279.1		TYE7	1.39792	0.252606	0.245475	1.24775	0.0101913	0.0152869
UCF1		56702.1	52377.5	61026.3	56435.8	70298.8	38733	86881.1	72760.6	75335.1	7134.58	30669.1	13065.9		61942.4	63296.9	61026.3	62629.4	92804.4	93340.6	95963	90817.4	75335.1	17699.4	30669.1	19648.5		72506.7	87371.8	22672.3		72506.7	161025	89374.3		UCF1	2.22083	0.19443	0.208698	1.23263	0.00149928	0.00478803
UGA32		42.094	111.52	37.2919	131.844	61.7649	25.0385	33.1004	17.6093	41.0657	17.5848	26.0595	18.9232		45.9842	134.77	37.2919	146.313	81.5385	60.339	36.5605	21.9793	41.0657	43.6242	26.0595	28.4566		84.3727	33.2018	32.7135		84.3727	61.1905	128.956		UGA32	0.72524	0.108665	0.149106	1.52841	0.10567	0.0810953
UGP1		1717.09	1133.52	1891.29	1202.84	1217.76	497.039	749.1	915.609	958.066	227.585	577.06	438.923		1875.78	1369.83	1891.29	1334.85	1607.62	1197.79	827.406	1142.83	958.066	564.59	577.06	660.052		1546.19	976.102	600.567		1546.19	1798.94	2367.43		UGP1	1.16346	0.0177548	0.0415182	1.53114	0.00104088	0.00448032
UME6		470.094	385.52	429.292	397.844	500.765	213.039	32.1004	18.6093	27.0657	116.585	244.06	147.923		513.539	465.892	429.292	441.505	661.081	513.39	35.456	23.2275	27.0657	289.222	244.06	222.447		504.117	28.5831	251.91		504.117	52.6781	993.027		UME6	0.104496	3.22442e-05	0.000858335	1.96984	0.00189151	0.00550763
UPC2		247.094	470.52	283.292	507.844	771.765	313.039	275.1	275.609	314.066	0.584805	132.06	36.9232		269.93	568.612	283.292	563.578	1018.84	754.374	303.857	344.006	314.066	1.45078	132.06	55.525		576.438	320.643	63.0118		576.438	590.94	248.392		UPC2	1.02516	0.177873	0.19566	0.430909	0.0205697	0.0254551
WH11		83155.1	10182.5	89730.3	10881.8	10146.8	17370	8547.1	11125.6	54570.1	4019.58	4012.06	3846.92		90840.1	12305.3	89730.3	12076.1	13395.2	41859.1	9440.55	13886.6	54570.1	9971.74	4012.06	5785		43367.7	25965.7	6589.6		43367.7	47854.5	25976.2		WH11	1.10346	0.502496	0.407818	0.598976	0.150492	0.0993248
YHB1		13174.1	5644.52	14172.3	6081.84	17031.8	5851.04	5889.1	5128.61	3380.07	234.585	1227.06	1002.92		14391.6	6821.26	14172.3	6749.3	22484.4	14100.1	6504.7	6401.36	3380.07	581.956	1227.06	1508.19		13119.8	5428.71	1105.74		13119.8	10005	4358.81		YHB1	0.762589	0.0678732	0.11582	0.332231	0.011034	0.0160642
YWP1		2396.09	214.52	2646.29	257.844	385.765	314.039	3472.1	5675.61	6038.07	19.5848	277.06	26.9232		2617.54	259.243	2646.29	286.141	509.265	756.784	3835.05	7084.11	6038.07	48.5858	277.06	40.487		1179.21	5652.41	122.044		1179.21	10417.3	481.098		YWP1	8.83413	0.00189315	0.0104991	0.407983	0.16552	0.107101
ZAP1		203.094	791.52	233.292	928.844	204.765	58.0385	83.1004	75.6093	213.066	7.5848	34.0595	50.9232		221.863	956.533	233.292	1030.78	270.319	139.864	91.7871	94.373	213.066	18.8163	34.0595	76.5782		475.442	133.075	43.1513		475.442	245.256	170.102		ZAP1	0.515848	0.201792	0.213163	0.357778	0.117089	0.0865059
ZCF20		214.094	442.52	209.292	496.844	214.765	90.0385	142.1	116.609	156.066	15.5848	50.0595	32.9232		233.88	534.775	209.292	551.37	283.52	216.979	156.955	145.548	156.066	38.6626	50.0595	49.5098		338.303	152.856	46.0773		338.303	281.711	181.637		ZCF20	0.832719	0.0950181	0.138977	0.536906	0.0188423	0.0239152
ZCF3		150.094	114.52	149.292	118.844	182.765	84.0385	187.1	145.609	207.066	77.5848	111.06	92.9232		163.965	138.395	149.292	131.886	241.276	202.52	206.659	181.745	207.066	192.472	111.06	139.738		171.222	198.49	147.756		171.222	365.813	582.455		ZCF3	2.13648	0.329205	0.295557	3.40174	0.457253	0.260161
ZCF31		81.094	206.52	94.2919	233.844	126.765	64.0385	1	8.60928	35.0657	1	59.0595	21.9232		88.5885	249.575	94.2919	259.507	167.348	154.323	1	10.7458	35.0657	1	59.0595	32.968		168.939	15.6038	31.0092		168.939	28.7576	122.238		ZCF31	0.170225	0.0106102	0.030047	0.723564	0.0185958	0.0239089
ZCF34		40.094	67.5205	33.2919	80.8437	28.7649	1	2.10041	9.60928	17.0657	1	1	1		43.7994	81.5968	33.2919	89.716	37.9738	2.40985	2.31997	11.994	17.0657	1	1	1		48.1313	10.4599	1		48.1313	19.2774	1		ZCF34	0.400517	0.0964451	0.139531	0.0207765	0.0456541	0.0470808
ZCF39		560.094	683.52	621.292	728.844	807.765	396.039	287.1	180.609	368.066	138.585	276.06	226.923		611.857	826.017	621.292	808.831	1066.37	954.392	317.112	225.43	368.066	343.8	276.06	341.247		814.792	303.536	320.369		814.792	559.412	1262.89		ZCF39	0.68657	0.00244815	0.0119027	1.54996	0.00260167	0.00660424
ZCF7		10.094	19.5205	2.29192	19.8437	5.76489	1	1	1	1	1	1	1		11.0268	23.59	2.29192	22.0215	7.61048	2.40985	1	1	1	2.48079	1	1.5038		11.4918	1	1.66153		2.58352	1	6.54974		ZCF7	0.160374	0.103336	0.145991	2.5352	0.123244	0.0892918
ZRT1		1367.09	18363.5	1464.29	20479.8	1250.76	910.039	551.1	255.609	930.066	274.585	534.06	672.923		1493.44	22191.9	1464.29	22727.4	1651.19	2193.05	608.708	319.043	930.066	681.187	534.06	1011.94		8620.21	619.272	742.396		8620.21	1141.31	2926.52		ZRT1	0.132399	0.2521	0.245475	0.339496	0.25877	0.155262
ZRT2		3436.09	14009.5	3815.29	15876.8	1877.76	901.039	2340.1	2075.61	3593.07	400.585	439.06	454.923		3753.65	16930.2	3815.29	17619.3	2478.92	2171.36	2584.72	2590.71	3593.07	993.767	439.06	684.113		7794.77	2922.83	705.646		7794.77	5386.73	2781.66		ZRT2	0.691069	0.306137	0.277189	0.356862	0.151916	0.0996005
orf19.1424		85.094	175.52	113.292	209.844	78.7649	30.0385	94.1004	56.6093	157.066	21.5848	30.0595	50.9232		92.9582	212.112	113.292	232.873	103.981	72.3882	103.937	70.6578	157.066	53.5474	30.0595	76.5782		137.934	110.554	53.395		137.934	203.748	210.483		orf19.1424	1.47714	0.548327	0.439652	1.52597	0.078865	0.0634767
orf19.1534		730.094	3166.52	744.292	3451.84	887.765	370.039	688.1	572.609	666.066	59.5848	243.06	180.923		797.568	3826.66	744.292	3830.67	1171.98	891.736	760.029	714.712	666.066	147.817	243.06	272.072		1877.15	713.602	220.983		1877.15	1315.16	871.114		orf19.1534	0.700614	0.240777	0.242783	0.464062	0.11092	0.0837809
orf19.1691		65.094	138.52	41.2919	165.844	51.7649	1	37.1004	24.6093	408.066	1	1	1		71.1098	167.399	41.2919	184.044	68.3371	2.40985	40.9786	30.7165	408.066	1	1	1		89.0986	159.92	1		89.0986	294.731	1		orf19.1691	3.30791	0.465911	0.38758	0.0112235	0.0788083	0.0634767
orf19.1862		1561.09	1370.52	1832.29	1435.84	828.765	765.039	2071.1	1852.61	3981.07	866.585	1109.06	1212.92		1705.37	1656.24	1832.29	1593.42	1094.09	1843.62	2287.6	2312.37	3981.07	2149.81	1109.06	1823.99		1620.84	2860.34	1694.29		1620.84	5271.57	6678.88		orf19.1862	3.25237	0.0177801	0.0415182	4.12063	0.785882	0.422839
orf19.2125		2647.09	4152.52	2939.29	4546.84	2619.76	1426.04	4614.1	3517.61	3538.07	792.585	1735.06	1633.92		2891.73	5018.22	2939.29	5045.84	3458.46	3436.53	5096.42	4390.56	3538.07	1966.24	1735.06	2457.09		3798.35	4341.68	2052.8		3798.35	8001.66	8092.12		orf19.2125	2.10662	0.436439	0.367658	2.13043	0.0234597	0.0286729
orf19.3615		394.094	556.52	447.292	629.844	513.765	261.039	144.1	75.6093	334.066	183.585	341.06	388.923		430.515	672.541	447.292	698.967	678.243	629.063	159.164	94.373	334.066	455.435	341.06	584.862		592.77	195.867	460.452		592.77	360.981	1815.1		orf19.3615	0.608972	0.00250202	0.0119027	3.06207	0.16774	0.107833
orf19.409		5497.09	3150.52	5863.29	3411.84	5348.76	2837.04	5993.1	4566.61	5157.07	637.585	2307.06	1034.92		6005.12	3807.33	5863.29	3786.28	7061.13	6836.82	6619.58	5699.89	5157.07	1581.71	2307.06	1556.32		5560	5825.51	1815.03		5560	10736.3	7154.84		orf19.409	1.93099	0.777909	0.581683	1.28684	0.00368839	0.0083318
orf19.411		319.094	403.52	374.292	451.844	572.765	230.039	352.1	295.609	381.066	15.5848	101.06	52.9232		348.584	487.644	374.292	501.432	756.132	554.357	388.906	368.97	381.066	38.6626	101.06	79.5858		503.74	379.647	73.1026		503.74	699.684	288.17		orf19.411	1.38898	0.199769	0.212714	0.572062	0.00180956	0.00550763
orf19.4174		165.094	289.52	190.292	302.844	321.765	128.039	94.1004	65.6093	91.0657	14.5848	57.0595	45.9232		180.352	349.878	190.292	336.08	424.776	308.553	103.937	81.8913	91.0657	36.1818	57.0595	69.0592		298.322	92.298	54.1002		298.322	170.104	213.263		orf19.4174	0.570203	0.00881303	0.0261134	0.714875	0.00381268	0.0083318
orf19.449		6892.09	4189.52	8012.29	4451.84	6776.76	3306.04	3294.1	2801.61	2971.07	782.585	2788.06	1080.92		7529.04	5062.93	8012.29	4940.42	8946.3	7967.04	3638.44	3496.88	2971.07	1941.43	2788.06	1625.49		7076.34	3368.79	2118.33		7076.34	6208.64	8350.44		orf19.449	0.87738	0.00789195	0.02501	1.18005	0.00188442	0.00550763
orf19.4706		574.094	1127.52	606.292	1232.84	846.765	348.039	305.1	186.609	962.066	255.585	373.06	495.923		627.15	1362.58	606.292	1368.14	1117.85	838.719	336.993	232.919	962.066	634.052	373.06	745.769		986.789	510.66	584.293		986.789	941.138	2303.28		orf19.4706	0.953737	0.104201	0.145991	2.33412	0.109028	0.0830291
orf19.5517		149.094	20.5205	138.292	46.8437	78.7649	20.0385	23.1004	20.6093	40.0657	82.5848	103.06	113.923		162.873	24.7985	138.292	51.9847	103.981	48.2897	25.5152	25.7238	40.0657	204.876	103.06	171.317		88.3698	30.4349	159.751		88.3698	56.091	629.737		orf19.5517	0.634731	0.124144	0.165236	7.12616	0.105373	0.0810953
orf19.5626		5825.09	1096.52	6024.29	1207.84	3689.76	2371.04	2860.1	2533.61	2117.07	812.585	2680.06	826.923		6363.44	1325.12	6024.29	1340.4	4871.02	5713.84	3159.07	3162.37	2117.07	2015.85	2680.06	1243.53		4273.02	2812.84	1979.81		4273.02	5184.01	7804.42		orf19.5626	1.2132	0.335271	0.296139	1.82644	0.150142	0.0993248
orf19.5848		124.094	211.52	138.292	247.844	234.765	115.039	113.1	82.6093	88.0657	1	25.0595	14.9232		135.562	255.617	138.292	275.044	309.923	277.225	124.923	103.11	88.0657	1	25.0595	22.4414		231.944	105.366	16.167		231.944	194.189	63.7302		orf19.5848	0.837222	0.0278123	0.057841	0.274766	0.00209697	0.00576667
orf19.6578		2718.09	1731.52	3036.29	1974.84	3716.76	2029.04	2202.1	2015.61	1588.07	326.585	1231.06	519.923		2969.29	2092.5	3036.29	2191.57	4906.66	4889.67	2432.29	2515.82	1588.07	810.188	1231.06	781.86		3347.67	2178.72	941.036		3347.67	4015.36	3709.56		orf19.6578	1.19945	0.176964	0.19566	1.1081	0.0157843	0.0214061
orf19.6660		352.094	178.52	386.292	175.844	248.765	73.0385	219.1	233.609	365.066	62.5848	120.06	67.9232		384.634	215.738	386.292	195.142	328.405	176.012	242.004	291.583	365.066	155.26	120.06	102.143		281.037	299.551	125.821		281.037	552.068	495.985		orf19.6660	1.9644	0.775072	0.581683	1.76484	0.0331498	0.0368745
orf19.670.2		20156.1	19107.5	22848.3	21019.8	18914.8	12845	22259.1	17759.6	16131.1	5572.58	15410.1	9220.92		22018.9	23091	22848.3	23326.7	24970.2	30954.6	24585.9	22167	16131.1	13824.4	15410.1	13866.4		24534.9	20961.3	14367		24534.9	38631.4	56634.5		orf19.670.2	1.57455	0.20605	0.21546	2.30832	0.00140704	0.00464323
ARP3		114.094	273.52	130.292	316.844	106.765	47.0385	88.1004	108.609	212.066	16.5848	44.0595	50.9232		124.638	330.543	130.292	351.616	140.945	113.356	97.3098	135.562	212.066	41.1434	44.0595	76.5782		198.565	148.313	53.927		198.565	273.338	212.58		ARP3	1.37657	0.495406	0.404531	1.07058	0.0668337	0.0596084
CLN3		810.094	1304.52	860.292	1421.84	1048.76	564.039	889.1	646.609	1068.07	410.585	1223.06	792.923		884.961	1576.48	860.292	1577.89	1384.52	1359.25	982.04	807.076	1068.07	1018.57	1223.06	1192.4		1273.9	952.394	1144.68		1273.9	1755.25	4512.31		CLN3	1.37786	0.152355	0.182689	3.54213	0.5353	0.302827
CMK2		183.094	504.52	189.292	557.844	149.765	86.0385	132.1	118.609	235.066	51.5848	71.0595	90.9232		200.015	609.7	189.292	619.065	197.711	207.34	145.909	148.044	235.066	127.971	71.0595	136.73		337.187	176.34	111.92		337.187	324.991	441.189		CMK2	0.963831	0.25523	0.245475	1.30844	0.124467	0.0892918
YRA1		271.094	579.52	296.292	518.844	287.765	98.0385	419.1	361.609	434.066	28.5848	70.0595	74.9232		296.148	700.336	296.292	575.785	379.891	236.258	462.91	451.349	434.066	70.9129	70.0595	112.669		414.118	449.442	84.5473		414.118	828.314	333.285		YRA1	2.00019	0.757276	0.57269	0.804807	0.0201653	0.0252705
orf19.3456		1.09399	39.5205	9.29192	22.8437	6.76489	1	1	1	1	1	1	1		1.19509	47.7595	9.29192	25.3508	8.93063	2.40985	1	1	1	1	1	1		15.823	1	1		2.55675	1	1		orf19.3456	0.116475	0.207466	0.21546	0.391122	0.207466	0.12837
Sum		832537	752583	909478	819537	688924	377401	446779	395366	493482	93007.8	230733	153433														Sum	909477	493481	230715
NF		1.09242	1.20848	1	1.10975	1.32014	2.40985	1.10453	1.24817	1	2.48079	1	1.5038														NF	1	1.84298	3.942
