# Supplementary material for: Intravital imaging-based genetic screen reveals the transcriptional network governing Candida albicans filamentation during mammalian infection
Source: eLife. 2023 Feb 27;12:e85114. doi: 10.7554/eLife.85114 (PMC9995110; doi:10.7554/eLife.85114)
Supplement: Supplementary file 7. [file elife-85114-supp7.xlsx]

## Sheet: WT
Probe Name	RPMI/Y			Probe Name	Ear/Y
	FC	FDR			FC	FDR
ACE2	0.66112	0.0295749		ACE2	0.557629	0.00632076
ACS1	7.55776	0.00045989		ACS1	0.89261	0.187176
ACS2	0.167616	0.00045989		ACS2	0.0604515	1.85795e-06
ADH5	3.24226	0.000928964		ADH5	4.21915	0.00653788
AHR1	1.45034	0.0207008		AHR1	5.53192	0.00838127
ALS1	73.7911	0.000593348		ALS1	29.0859	0.00694325
ALS2	0.505055	0.0120924		ALS2	0.215839	0.000461688
ALS3	81.6378	0.00103717		ALS3	37.3012	2.60224e-05
ALS4	0.254487	0.00113881		ALS4	1.84026	0.134009
ALS5	0.405266	0.000957739		ALS5	0.228915	0.000198054
ALS6	0.21498	0.0105955		ALS6	0.0248338	0.000158338
ALS7	0.898541	0.0170881		ALS7	2.00166	0.0975266
ALS9	0.18642	0.00206295		ALS9	0.376541	0.00160357
AOX2	64.8783	7.7563e-05		AOX2	125.459	0.000209169
ARG1	0.388415	0.0264558		ARG1	0.114423	0.00249169
ARG81	0.717212	0.00593937		ARG81	0.812673	0.151738
BCR1	1.52725	0.000679027		BCR1	2.12652	0.0467142
BRG1	13.281	0.000997465		BRG1	18.4529	0.00907271
CAP1	0.721961	0.00793838		CAP1	1.73544	0.0169717
CAT1	0.537694	0.000860161		CAT1	0.604728	0.0164479
CDC10	0.0453531	0.000262769		CDC10	0.1269	8.70207e-06
CDR1	0.508086	0.000342631		CDR1	0.255609	1.78513e-06
CDR2	0.299348	0.00685912		CDR2	0.29059	0.00358258
CHT2	0.859688	0.0669041		CHT2	0.168631	0.0016375
CHT3	0.408829	0.000894881		CHT3	0.147331	5.16299e-07
CIT1	3.23793	0.000123154		CIT1	0.517346	0.000489454
CPH1	1.16541	0.0444052		CPH1	0.394334	0.001624
CPH2	2.22516	0.000480519		CPH2	2.66008	0.00855139
CRH11	1.59524	0.00657242		CRH11	1.31468	0.102257
CSA1	38.5853	0.000265166		CSA1	37.3302	0.0751299
CSH1	0.149614	0.00121485		CSH1	0.294511	0.00392602
DAK2	0.230413	0.000123154		DAK2	0.0596865	5.16668e-08
DDR48	0.29132	0.000941554		DDR48	0.411456	0.0118985
DFG5	0.3919	0.00607024		DFG5	0.323062	0.00276746
ECE1	5763.36	0.000104347		ECE1	15863.9	0.000169235
ECM331	0.194399	0.000418669		ECM331	0.330637	2.81842e-05
EFG1	0.772105	0.0307877		EFG1	0.471531	0.00449187
ELF1	1.62495	0.000997465		ELF1	0.184439	4.34696e-07
ENA2	11.2257	0.000262769		ENA2	6.64847	0.00102697
ENA21	1.06152	0.0634952		ENA21	0.50857	0.00521221
FAV2	3.40272	0.000262769		FAV2	2.43535	0.0211333
FBP1	5.57944	0.00148029		FBP1	0.954494	0.211074
FDH1	38.7549	0.000111509		FDH1	24.8933	0.00380053
FGR15	0.551191	0.00103735		FGR15	0.134984	6.73721e-06
FKH2	0.345867	0.000682347		FKH2	0.19307	1.66338e-05
FRP1	32.1986	0.00113136		FRP1	22.0658	0.0231326
FRP2	44.6279	6.24548e-05		FRP2	7.1159	0.0636538
FRP3	3.93784	0.000566187		FRP3	0.796213	0.0629703
FTR1	1.66146	0.0109171		FTR1	2.39618	0.0133392
GAL1	2.52799	0.00113136		GAL1	8.38501	0.00632076
GAL4	0.391371	2.17195e-05		GAL4	0.304749	5.16299e-07
GAP2	8.68294	0.000342631		GAP2	3.78973	0.0343708
GCA2	3.81905	0.00616534		GCA2	8.42015	0.0376465
GCN4	0.148343	0.000566187		GCN4	0.269695	8.03149e-06
GIS2	0.234471	0.000127605		GIS2	0.0500849	5.16668e-08
GNP1	1.7772	0.00461399		GNP1	2.54453	0.00816511
GPD2	4.36966	0.00103735		GPD2	0.223572	4.62013e-05
HAC1	1.1374	0.0476381		HAC1	0.492774	0.00149686
HAP2	4.01654	0.000342631		HAP2	1.25795	0.158604
HAP3	7.03386	0.00389327		HAP3	1.67083	0.102866
HAP43	2.53877	0.000311584		HAP43	0.808137	0.117514
HEM1	0.503829	0.000316994		HEM1	0.208896	3.11131e-06
HGT7	0.069509	0.000442859		HGT7	0.138927	1.09338e-05
HOG1	0.497283	0.00181687		HOG1	0.121164	1.06722e-05
HSP104	0.98147	0.142987		HSP104	2.6895	0.0391362
HSP70	0.650117	0.011566		HSP70	0.711259	0.0391362
HTA1	0.230567	0.000562676		HTA1	0.128606	1.78513e-06
HTA2	0.236356	0.00045989		HTA2	0.0748022	6.57008e-07
HWP1	3821.44	0.000784883		HWP1	4373.51	0.000339073
HYR1	15.3369	0.000265166		HYR1	114.193	0.0464637
IFD6	2.51631	0.00593937		IFD6	5.16076	0.0230714
IHD1	86.5208	0.000262769		IHD1	56.0074	0.00516974
INO4	0.922563	0.030031		INO4	0.421894	0.00213792
IRE1	0.364377	0.000682347		IRE1	0.507216	0.00249169
IRO1	1.37357	0.0196408		IRO1	1.01916	0.24454
KIP4	6.15556	0.000340008		KIP4	7.63512	0.00367116
KRE1	0.68341	0.0291807		KRE1	0.413322	0.00295751
MAC1	0.958646	0.101455		MAC1	1.06162	0.244444
MAE1	0.264192	0.00023561		MAE1	0.348596	0.000168638
MBF1	0.269144	7.7563e-05		MBF1	0.139209	3.2196e-08
MDM34	6.99764	0.000265166		MDM34	23.8145	0.00155598
MET28	0.448753	0.000442859		MET28	0.246277	6.80356e-07
NDT80	0.552702	0.000396036		NDT80	0.343075	4.73424e-05
NPR1	0.369641	0.000104347		NPR1	0.23046	2.50743e-06
NRG1	0.40787	0.000385807		NRG1	0.455461	0.0225455
PCK1	15.5806	7.7563e-05		PCK1	11.166	0.000343119
PES1	0.860501	0.0658771		PES1	0.020225	8.70207e-06
PFK2	0.109316	0.000418669		PFK2	0.224138	3.66692e-05
PGA13	1.59481	0.0111847		PGA13	15.7381	0.0416253
PGA17	17.6157	0.000265166		PGA17	3.12711	0.080357
PGA25	5.99927	0.000265166		PGA25	1.45827	0.173817
PGA34	105.644	0.0001859		PGA34	107.142	0.000249919
PGA37	17.127	0.000418669		PGA37	6.99322	0.00996803
PGA48	0.828842	0.0285659		PGA48	2.36009	0.0136382
PGA53	0.266717	0.00041746		PGA53	0.0457363	6.7274e-07
PGA7	13.2725	0.000441264		PGA7	8.06925	0.0455712
PHO89	50.3531	0.00317629		PHO89	18.9865	0.00742906
PHR1	3.35932	0.00616534		PHR1	3.39802	0.0242609
PHR2	0.00626129	5.15521e-05		PHR2	0.0239252	1.21199e-09
PIL1	0.532205	0.000127605		PIL1	0.248686	3.76399e-05
PIR1	0.174261	0.000235866		PIR1	0.340607	0.00134027
PLB5	3.14844	0.000262769		PLB5	2.27911	0.0199736
POL1	0.189836	0.00280416		POL1	0.096013	9.0883e-05
PRA1	1.28343	0.040715		PRA1	274.719	0.0975111
RBR1	2.48063	0.0121294		RBR1	6.20063	0.0133392
RBR2	5.87655	0.000123154		RBR2	1.19632	0.198261
RBT1	15.6969	0.000275209		RBT1	1.47427	0.113194
RBT5	10.6922	0.000104347		RBT5	3.96131	0.070605
RCT1	0.204327	0.00337537		RCT1	0.124548	0.000181894
RFG1	0.527689	0.0026893		RFG1	0.452701	0.000236345
RFX2	9.03786	0.000653395		RFX2	8.78672	0.00182242
RHR2	1.36102	0.00163753		RHR2	0.159993	1.85795e-06
RIM101	1.69536	0.00551725		RIM101	3.53792	0.002555
RNR22	0.0289298	7.7563e-05		RNR22	0.44978	5.14213e-05
ROB1	0.700558	0.00482691		ROB1	0.182576	1.85795e-06
RPN4	0.879657	0.0634952		RPN4	0.529502	0.00298015
RTA3	0.0111877	0.00045989		RTA3	0.0185003	2.1818e-06
SAP1	0.339971	0.01529		SAP1	1.23018	0.140828
SAP10	0.287024	0.000795154		SAP10	0.0570387	2.85825e-06
SAP2	0.829395	0.12868		SAP2	0.454036	0.0580148
SAP4	3.77999	0.0106501		SAP4	120.179	0.00125151
SAP5	34.9352	0.00111701		SAP5	149.922	0.00313416
SAP6	101.555	0.000377636		SAP6	442.864	0.00740363
SAP9	0.632006	0.00337537		SAP9	0.808879	0.0570587
SCW11	0.325217	0.000450073		SCW11	0.0763204	7.29793e-08
SCW4	43.2365	0.000463171		SCW4	12.3835	0.0319508
SEF1	3.23595	0.000888409		SEF1	0.945725	0.238051
SEF2	1.08422	0.0457765		SEF2	0.511825	0.00612864
SGA1	2.10459	0.0011902		SGA1	0.67252	0.0323214
SIN3	0.544413	0.000566187		SIN3	0.187819	3.10078e-07
SIT1	10.3926	0.000342631		SIT1	8.40603	0.0211333
SMC2	0.262247	0.000622522		SMC2	0.106559	1.63038e-05
SOD4	4.39911	0.00593937		SOD4	4.03969	0.001326
SOD5	15.1168	0.000860161		SOD5	24.9832	0.000267543
SOD6	19.9029	0.00125545		SOD6	28.2515	0.022734
SOG2	0.643417	0.000178496		SOG2	0.451666	0.00233808
SSB1	0.159823	0.000550324		SSB1	0.0363521	1.78513e-06
STF2	4.69699	0.000418669		STF2	4.70915	0.0210829
STP2	1.24126	0.00499812		STP2	2.6042	0.0248379
SUT1	0.381717	0.000566187		SUT1	0.336208	4.05488e-06
TEC1	6.80819	0.000250732		TEC1	36.235	0.0211333
TPK1	0.69171	0.0070546		TPK1	0.231278	0.000317196
TPK2	0.354117	0.000480519		TPK2	0.166292	5.16299e-07
TPS2	2.25904	0.00114339		TPS2	2.90135	0.000143256
TRR1	0.423171	0.000818946		TRR1	0.171845	1.85795e-06
TRX1	0.160149	0.000265166		TRX1	0.0641824	3.10078e-07
TTR1	0.266318	7.7563e-05		TTR1	0.130735	3.69391e-07
TUP1	0.292298	6.24548e-05		TUP1	0.253197	3.11131e-06
TYE7	0.168898	0.000156317		TYE7	0.478325	0.00231237
UCF1	6.83044	0.00148029		UCF1	14.3204	0.000840812
UGA32	0.513256	0.00144444		UGA32	0.256519	0.000338731
UGP1	0.462285	0.000703545		UGP1	0.199393	6.80356e-07
UME6	222.291	0.000442859		UME6	504.113	0.000169235
UPC2	0.111451	0.00141649		UPC2	0.366546	0.00335248
WH11	0.915027	0.0235738		WH11	1.5839	0.17067
YHB1	3.90736	0.000342631		YHB1	4.72262	0.0211333
YWP1	0.00526007	0.000465142		YWP1	0.0355015	3.7287e-06
ZAP1	0.294616	0.000480519		ZAP1	2.96681	0.102257
ZCF20	1.40059	0.0109171		ZCF20	1.16636	0.19495
ZCF3	1.37914	0.0135575		ZCF3	0.197151	1.78513e-06
ZCF31	0.472374	0.00131888		ZCF31	0.870526	0.187329
ZCF34	0.283589	0.000777747		ZCF34	0.123685	2.65394e-05
ZCF39	0.55383	0.000262769		ZCF39	0.485291	0.000443834
ZCF7	0.95772	0.141247		ZCF7	0.124466	0.000169235
ZRT1	2.69672	0.00357363		ZRT1	314.17	0.0992707
ZRT2	0.0560574	0.0011902		ZRT2	1.72649	0.165772
orf19.1424	1.29145	0.00152039		orf19.1424	0.552273	0.0241542
orf19.1534	0.272339	0.00241593		orf19.1534	6.53744	0.0667622
orf19.1691	0.00180748	0.000480519		orf19.1691	0.00347978	2.1818e-06
orf19.1862	1.34124	0.00337537		orf19.1862	0.411182	8.84203e-05
orf19.2125	0.0722943	0.000628226		orf19.2125	0.206905	2.59911e-05
orf19.3615	0.445822	0.000371833		orf19.3615	0.281089	5.66234e-06
orf19.409	0.85132	0.0663944		orf19.409	0.939568	0.213041
orf19.411	1.7376	0.013634		orf19.411	3.91247	0.00632076
orf19.4174	1.20388	0.016907		orf19.4174	0.904524	0.190447
orf19.449	5.02729	0.000894881		orf19.449	10.4702	0.001326
orf19.4706	0.294603	0.00161552		orf19.4706	0.391944	0.00149062
orf19.5517	0.188015	0.00125545		orf19.5517	0.0666165	1.32376e-05
orf19.5626	6.20968	0.00204295		orf19.5626	17.4226	0.0221631
orf19.5848	8.7854	0.000748943		orf19.5848	6.38633	0.00612864
orf19.6578	5.75821	0.000418669		orf19.6578	9.56142	0.00810511
orf19.6660	1.00525	0.144008		orf19.6660	1.11539	0.19495
orf19.670.2	168.481	0.000210604		orf19.670.2	99.2354	5.7331e-05
ARP3	0.377083	0.000905441		ARP3	0.0779187	3.11131e-06
CLN3	0.638446	0.013537		CLN3	0.757257	0.0467142
CMK2	0.689105	0.00524531		CMK2	0.223973	0.000343119
YRA1	0.25037	7.7563e-05		YRA1	0.0950795	5.16299e-07
orf19.3456	0.824871	0.0567924		orf19.3456	0.118794	0.000138843

## Sheet: efg1-rob1-brg1
Probe Name	In vitro		In vitro		In vitro				In vivo		In vivo		In vivo
	efg1ΔΔ/WT		rob1ΔΔ/WT		brg1ΔΔ/WT				efg1ΔΔ/WT		rob1ΔΔ/WT		brg1ΔΔ/WT
	FC	FDR	FC	FDR	FC	FDR			FC	FDR	FC	FDR	FC	FDR
ACE2	1.03943	0.214503	0.656949	0.335098	0.986452	0.0424085		ACE2	6.12758	0.0423422	38.5557	1.08885e-05	10.6446	0.00782611
ACS1	0.169964	0.000140355	2.40146	0.205647	1.18415	0.00271344		ACS1	4.42998	0.0875249	2.50341	0.0115496	2.30777	0.255552
ACS2	1.59881	0.000424075	1.32151	0.00460506	1.3558	0.00150391		ACS2	2.01519	0.131911	0.982591	0.00647998	1.07343	0.187859
ADH5	0.614538	0.00204009	0.583257	0.00500876	0.618188	0.00899342		ADH5	0.122192	0.00299267	0.52215	0.00110825	1.14266	0.125566
AHR1	0.782176	0.0422928	0.923106	0.292908	0.945201	0.18422		AHR1	0.179603	0.00542309	0.542364	0.00194886	0.275537	0.0190553
ALS1	0.00972544	0.000172136	0.805679	0.33005	1.05306	0.0688662		ALS1	0.0758869	0.0069685	0.615583	0.00303588	1.19702	0.19566
ALS2	8.29532	3.8288e-05	2.13028	0.00456513	1.76027	0.0663153		ALS2	27.6104	0.000426888	26.6068	4.66655e-05	1.97256	0.598122
ALS3	0.00925168	0.000346752	0.161231	0.00190546	0.164261	0.00197859		ALS3	0.0522989	2.9328e-05	0.0772384	1.59483e-05	0.0660667	0.000244678
ALS4	3.6607	0.000424724	2.517	0.00160561	2.70694	0.00271344		ALS4	0.584807	0.0833418	4.45923	0.161119	8.74428	0.00725049
ALS5	1.18513	0.214135	0.632749	0.0703105	1.38979	0.0246013		ALS5	2.46613	0.276974	3.00041	0.0545513	3.41921	0.146478
ALS6	1.2779	0.232763	0.125522	0.121128	0.117826	0.150925		ALS6	3.22522	0.491489	5.34253	0.216489	1.84298	0.707979
ALS7	18.4085	0.000172136	0.963899	0.0132353	1.23479	0.118325		ALS7	17.9571	0.000426888	1.5605	0.0245057	0.93855	0.233255
ALS9	2.42282	0.0848306	2.3011	0.0366133	2.82076	0.0827944		ALS9	4.47987	0.150894	2.49723	0.0208366	2.89286	0.11085
AOX2	0.305968	0.000256092	0.188269	0.00461831	1.20803	0.000106162		AOX2	3.87258	0.139853	2.32984	0.000915783	3.087	0.0410077
ARG1	0.64425	0.00700983	0.300596	0.235293	0.854048	0.000106162		ARG1	6.14854	0.0572163	5.42422	0.204562	2.00057	0.494685
ARG81	2.24494	0.00485206	1.40679	0.00413527	1.5953	0.0593313		ARG81	2.8948	0.366146	0.914056	0.00634841	0.845881	0.130862
BCR1	1.0966	0.258731	1.0024	0.155229	1.11639	0.200455		BCR1	0.842348	0.0250552	1.98968	0.0123672	1.91613	0.641419
BRG1	0.172169	0.000424724	0.683631	0.000870182	0.00231797	0.0205154		BRG1	0.0777712	0.00829543	0.754591	0.00422669	0.000493555	0.0190553
CAP1	1.05288	0.204294	1.36902	0.0163622	1.54682	0.0934104		CAP1	1.47371	0.00730352	1.565	0.000915783	1.53293	0.245475
CAT1	0.0953756	9.0628e-05	0.842691	0.0118242	0.562724	0.0512326		CAT1	3.66565	0.287931	1.65334	0.00444073	1.40504	0.254777
CDC10	2.70146	0.000826591	0.774261	0.0703105	1.24796	0.108936		CDC10	0.0695355	0.0250552	0.0410385	0.00692286	0.00371023	0.0435169
CDR1	0.375147	0.000249712	1.02709	0.00391088	1.81668	0.312279		CDR1	0.684123	0.00078582	1.20278	0.000332942	0.98722	0.0190553
CDR2	0.851058	0.216575	0.748676	0.186816	0.469205	0.338913		CDR2	0.184447	0.062598	0.305534	0.0211689	0.105398	0.127742
CHT2	2.00968	0.000127748	0.36263	0.00391088	0.707422	0.00103817		CHT2	1.89373	0.296362	0.400487	0.050404	0.267479	0.245475
CHT3	3.47474	0.000395293	1.64025	0.000605135	2.74737	0.0350249		CHT3	8.97043	0.000440041	2.80072	0.00319006	4.29949	0.000813973
CIT1	0.158488	4.1161e-05	3.03024	0.0366133	1.93473	0.000106162		CIT1	5.26657	0.0280322	2.00966	0.00110858	2.44747	0.0855166
CPH1	0.552956	0.00340715	0.467891	0.0138034	0.684401	0.00428702		CPH1	1.04133	0.030388	0.991547	0.00505917	0.597901	0.0598845
CPH2	1.77864	0.000424724	0.888608	0.037379	1.24426	0.0409333		CPH2	2.94793	0.32527	2.1641	0.00327076	2.14232	0.325505
CRH11	2.10517	0.00220097	0.522354	0.0259554	1.26089	0.0144423		CRH11	0.948807	0.00869385	0.215974	0.000915783	0.51726	0.0196619
CSA1	0.66223	0.00146077	1.29903	0.000328545	2.71324	0.217686		CSA1	0.619083	0.137015	0.195614	0.0360857	1.22464	0.466722
CSH1	1.58195	0.00255858	4.84343	0.00461831	2.22761	0.00269589		CSH1	0.944164	0.113277	0.726546	0.0253729	0.733413	0.236724
DAK2	3.9503	0.00024189	1.36743	0.000495446	1.57528	0.0178459		DAK2	2.83014	0.267271	1.72609	0.00165598	2.80366	0.0748691
DDR48	0.00309912	0.000288142	0.690071	0.020439	0.595094	0.0239436		DDR48	0.048031	0.0379327	0.48623	0.0155343	0.615576	0.180252
DFG5	1.66594	0.00416764	0.834143	0.0229925	1.43482	0.0934104		DFG5	1.40857	0.0872748	0.455187	0.00801717	1.08899	0.245475
ECE1	1.735e-05	3.7363e-05	0.00429127	9.32501e-05	0.0192519	0.000105044		ECE1	0.000242867	0.000229152	0.00164781	9.09849e-05	0.0149948	0.000813973
ECM331	0.704197	0.0164095	0.0825782	0.00414756	0.224977	0.00271344		ECM331	0.193017	0.000506352	0.18548	0.000179355	0.302495	0.00297101
EFG1	0.000543879	0.000409875	0.942793	0.0458007	1.26638	0.261434		EFG1	0.00262617	0.00542309	1.79261	0.00671845	1.19817	0.186449
ELF1	0.457274	0.000669691	0.436591	0.247399	0.943794	0.00173925		ELF1	3.61747	0.366146	1.31357	0.000431916	2.30052	0.137088
ENA2	0.704706	0.00739597	1.15161	0.228261	1.05652	0.300261		ENA2	1.28515	0.00455647	1.34092	0.000599468	1.37818	0.178725
ENA21	0.402111	3.9622e-05	1.02499	0.0193691	1.39465	0.211355		ENA21	0.83754	0.0120917	1.06395	0.00285877	1.72167	0.591388
FAV2	0.0253456	3.8288e-05	0.661015	0.000370278	0.22603	0.0155714		FAV2	1.70061	0.089985	1.29263	0.00307122	0.196919	0.0148229
FBP1	0.628108	0.00784965	1.17876	0.0434663	1.80368	0.300261		FBP1	3.11725	0.400015	1.81379	0.000915783	1.75447	0.554646
FDH1	5.09665	0.000290172	3.26354	0.0638193	2.93929	0.0311946		FDH1	11.0459	0.00085932	2.14995	0.00652914	2.69364	0.11099
FGR15	1.74738	0.0128254	0.894874	0.00581655	1.31488	0.161768		FGR15	3.5696	0.392677	2.07666	0.0197024	1.33325	0.326031
FKH2	2.37256	0.00132154	0.819793	0.0166531	1.45738	0.00271344		FKH2	1.45782	0.0331612	1.33443	0.00351477	1.14232	0.185138
FRP1	1.48559	0.0109561	0.925425	0.0229152	1.36729	0.15708		FRP1	1.72232	0.135009	0.663888	0.011062	1.90277	0.663285
FRP2	0.543488	9.0628e-05	1.16564	0.000370278	1.2839	0.0949156		FRP2	1.11514	0.135479	0.462621	0.0248544	0.991881	0.325505
FRP3	0.345766	0.000254628	2.47774	0.414863	1.01424	0.00269589		FRP3	9.37651	0.00078582	3.24308	0.0079969	2.74769	0.0410077
FTR1	1.98693	0.00255382	1.43338	0.0383804	1.71675	0.118952		FTR1	2.35407	0.113277	0.678733	0.000958307	1.80683	0.656947
GAL1	2.94294	0.00170886	1.43319	0.000689757	1.9685	0.10102		GAL1	0.828652	0.0117248	1.03064	0.00282257	1.20962	0.180252
GAL4	1.13224	0.103561	1.61505	0.234617	0.964256	0.00397933		GAL4	1.27027	0.000274151	1.31294	4.49375e-05	1.47123	0.125448
GAP2	0.828005	0.0701699	6.01994	0.0122945	2.44352	0.00134143		GAP2	5.66633	0.0433209	2.81709	0.0377523	3.68287	0.0408726
GCA2	1.32926	0.0932472	0.899413	0.145191	0.812311	0.190413		GCA2	1.28513	0.106292	2.64134	0.0504557	1.41529	0.445967
GCN4	1.04002	0.200342	1.21265	0.00385499	3.16445	0.261434		GCN4	2.19996	0.00708725	1.55101	4.49375e-05	2.25635	0.0606878
GIS2	1.54165	0.000138153	0.94346	0.000870182	1.36717	0.0217292		GIS2	5.75258	0.0101159	2.80634	0.00817672	3.27141	0.0196619
GNP1	0.818865	0.0187094	0.690568	0.00909399	0.647179	0.0363909		GNP1	1.05011	0.00606643	0.789374	0.000853723	1.14212	0.0855166
GPD2	0.144279	0.00026145	0.477475	0.0593015	0.835304	0.00306982		GPD2	1.07554	0.0460732	0.361332	0.00415726	0.992478	0.167852
HAC1	1.14695	0.141572	0.704885	0.037379	0.891762	0.0103296		HAC1	2.44633	0.0806258	1.03875	0.000454918	1.04869	0.0428821
HAP2	0.946358	0.0268825	0.550142	0.0458007	1.14168	0.00103817		HAP2	1.39898	0.0549889	0.920706	0.00544453	2.35239	0.296139
HAP3	2.32527	0.00619866	2.19535	0.00385499	3.61898	0.0512326		HAP3	3.68015	0.359591	2.07153	0.0214617	3.60211	0.0888808
HAP43	1.21572	0.127199	1.11443	0.00335172	1.40283	0.447256		HAP43	4.6868	0.0581276	1.87858	0.00601864	2.45435	0.198911
HEM1	0.696502	0.000598158	0.519503	0.0540334	0.835474	0.00277247		HEM1	4.94001	0.0379327	1.29303	0.00157537	2.43339	0.145179
HGT7	28.6348	0.000932871	1.71682	0.00060918	3.2256	0.0188772		HGT7	1.71821	0.0806258	2.48807	0.0205709	3.60256	0.0408726
HOG1	1.42947	0.00622859	1.18663	0.00657169	1.31117	0.0682883		HOG1	1.63164	0.0806258	0.717072	0.00544453	0.771786	0.117721
HSP104	1.1262	0.226708	0.905799	0.382188	1.03642	0.159094		HSP104	7.41628	0.0069685	11.4384	0.00415726	7.98459	0.0018492
HSP70	0.92357	0.115655	0.980831	0.0294227	0.644436	0.274463		HSP70	3.33591	0.423711	9.1034	0.00272049	4.51766	0.00660071
HTA1	4.02972	0.000134964	0.359267	0.0296418	0.729059	0.00324299		HTA1	1.30027	0.000426888	0.730047	1.17326e-05	0.77217	0.0030015
HTA2	3.73111	0.000147227	0.305554	0.0118147	0.623272	0.00306982		HTA2	1.73476	0.00606643	1.39317	0.000124334	0.825939	0.0119027
HWP1	2.87995e-05	0.000249712	0.0105626	0.000820743	0.0123491	0.00106029		HWP1	0.00027059	0.000426888	0.00560424	0.000138016	0.0158112	0.00121878
HYR1	0.0146188	4.6181e-05	0.00942181	0.000318087	0.0326859	0.000134644		HYR1	0.00521571	0.0572163	0.00895127	0.0191602	0.0157029	0.118663
IFD6	2.40723	0.000409875	0.432701	0.0565129	0.489999	0.0109567		IFD6	2.08608	0.148677	2.54057	0.0272219	2.15696	0.523478
IHD1	0.000100606	4.5606e-05	0.582948	0.000437563	0.290512	0.00252324		IHD1	0.00135929	0.00539462	0.395655	0.00197952	0.0703032	0.0138688
INO4	1.63769	0.0224999	1.96198	0.00434493	1.63894	0.0185317		INO4	4.0076	0.199128	1.68611	0.00817672	0.974101	0.137447
IRE1	3.31237	0.000185565	1.38806	0.0188919	1.48627	0.18435		IRE1	1.50862	0.0295438	0.786567	0.00127318	0.877435	0.0534466
IRO1	0.540603	0.00133729	1.36321	0.0290391	0.774003	0.191538		IRO1	0.371915	0.000469546	0.572896	0.000179355	0.291158	0.0018492
KIP4	0.771526	0.00261846	0.162373	0.000328545	0.21287	0.000347148		KIP4	0.325957	0.00347249	0.277066	0.000915783	0.304239	0.01159
KRE1	0.161003	0.000250491	0.421319	0.00498767	0.53612	0.00188387		KRE1	0.668285	0.00542309	0.947512	0.00136878	0.582323	0.0204467
MAC1	0.480916	0.023159	0.933209	0.274392	0.962303	0.233319		MAC1	1.71556	0.147541	0.449415	0.0124265	0.478504	0.130862
MAE1	2.29331	0.00104025	1.37922	0.00385499	1.86712	0.0978602		MAE1	1.29764	0.0171297	1.17778	0.00197952	1.48846	0.295557
MBF1	1.18587	0.0599688	1.30499	0.000328545	1.59145	0.137223		MBF1	1.91246	0.00137166	1.58217	5.7378e-05	1.75238	0.400834
MDM34	1.00175	0.188354	1.2143	0.35491	1.05147	0.171155		MDM34	1.81035	0.030388	1.38236	0.00130934	1.11604	0.08281
MET28	0.712675	0.00170886	1.82352	0.00630915	2.51248	0.00190416		MET28	2.46801	0.0379327	2.69948	0.000309337	2.73271	0.00635308
NDT80	0.961561	0.103411	0.549767	0.211247	1.0854	0.00134143		NDT80	2.84877	0.242929	1.48223	0.00110825	1.75972	0.582968
NPR1	1.16572	0.159869	1.37278	0.00272808	1.64663	0.153548		NPR1	1.17171	0.00542309	0.726425	0.000534504	1.52096	0.252809
NRG1	2.69855	0.000624021	2.4276	0.00391088	3.38013	0.00444074		NRG1	0.623289	0.0717687	2.21268	0.0465834	4.13399	0.0460551
PCK1	0.291205	0.000198707	0.869328	0.175426	1.3191	0.0897341		PCK1	0.79611	0.000915499	0.337786	0.000124334	0.64917	0.00427995
PES1	0.181153	0.00133661	0.362792	0.00460506	0.448418	0.00306982		PES1	8.23669	0.0798141	5.24338	0.212664	0.48542	0.180252
PFK2	7.91302	0.00113861	2.14927	0.020439	1.53547	0.00313786		PFK2	0.598777	0.00869385	1.37457	0.00405281	1.53661	0.392307
PGA13	0.0493866	3.8288e-05	0.739992	0.00037008	0.493509	0.0166909		PGA13	0.107042	0.0475262	0.133781	0.0154871	0.24948	0.125566
PGA17	0.0194535	4.5606e-05	0.0461525	0.0242777	0.316165	0.000145753		PGA17	27.7379	2.9328e-05	1.34942	0.032216	2.61879	0.372487
PGA25	0.0432508	4.6181e-05	0.00560428	0.0369056	0.295162	0.000106162		PGA25	32.6985	2.9328e-05	1.52265	0.0401592	1.41384	0.528638
PGA34	2.49458	0.00025346	0.0654727	0.000328545	0.256587	0.000106162		PGA34	3.86471	0.114263	0.270295	0.000124334	0.431415	0.00277429
PGA37	0.109712	0.000256092	0.165693	0.000638114	0.227378	0.00102885		PGA37	0.496152	0.0103438	0.763449	0.00327076	0.555317	0.0435169
PGA48	2.36797	0.000256092	0.661426	0.214525	0.934272	0.0116397		PGA48	0.718416	0.00542309	0.361594	0.000878035	0.578735	0.0196619
PGA53	0.643121	0.00216873	0.953074	0.0703105	1.18872	0.137223		PGA53	1.70609	0.148677	2.57586	0.0449035	2.75547	0.270528
PGA7	1.01632	0.112916	1.11365	0.00200761	1.47288	0.354515		PGA7	1.43603	0.136712	0.304359	0.0155652	1.06866	0.296139
PHO89	0.783104	0.0422928	0.528057	0.33785	1.08307	0.0296998		PHO89	0.122245	0.00711723	0.280841	0.00241275	0.54576	0.0435169
PHR1	0.726858	0.0270502	0.500372	0.219717	0.897066	0.0219424		PHR1	0.354292	0.0129764	0.0867673	0.00292458	0.187727	0.0280836
PHR2	0.245255	0.000731439	0.191932	0.193331	1.16455	0.00190416		PHR2	1.99048	0.0248356	1.54678	0.000825719	2.44061	0.188721
PIL1	0.988731	0.00324368	1.29944	0.00951921	1.26715	0.0047686		PIL1	1.35395	0.0369488	1.41155	0.00500751	1.09839	0.180252
PIR1	3.04173	0.000144817	1.77473	0.000177331	2.91407	0.00190416		PIR1	1.12584	0.0556084	0.974336	0.00915017	2.70854	0.18792
PLB5	0.260303	0.000140355	0.494463	0.366562	1.03288	0.000738158		PLB5	0.731874	0.0069685	0.635313	0.00129404	0.761761	0.0405134
POL1	1.59239	0.0789947	0.400694	0.405452	1.02615	0.00150391		POL1	0.956107	0.0377983	0.725915	0.00601864	0.0200548	0.0261134
PRA1	0.659794	0.106538	4.47092	0.00838959	4.03899	0.00358658		PRA1	0.099913	0.139237	0.0529252	0.0495719	0.152121	0.245475
RBR1	0.0226828	0.00026145	0.0225353	0.000870182	0.0211537	0.00119476		RBR1	1.70499	0.114263	0.929607	0.00456285	0.78869	0.106432
RBR2	0.263525	0.000135762	0.266445	0.22192	0.779814	0.000106162		RBR2	11.0735	0.00244571	1.67571	0.0227302	2.18597	0.492469
RBT1	0.00285119	4.1161e-05	0.46427	0.0464355	0.866023	0.00271344		RBT1	0.0895189	0.00844976	0.148287	0.00282257	0.0511538	0.0196619
RBT5	0.940009	0.000172136	1.24905	0.000328545	1.70804	0.15708		RBT5	0.724345	0.0872748	0.320244	0.0191602	0.906783	0.264744
RCT1	0.101616	0.000674499	0.922665	0.0496699	0.741089	0.18422		RCT1	0.238533	0.0327066	0.687844	0.0119324	0.70351	0.163766
RFG1	4.95514	0.000409875	1.44091	0.0294227	1.53162	0.0612695		RFG1	5.72095	0.00299267	9.0419	0.000878035	2.58175	0.072085
RFX2	0.0655783	0.000209166	0.321826	0.00152552	0.33327	0.00325629		RFX2	0.075722	0.00110847	0.109609	0.000431916	0.0540111	0.0031267
RHR2	0.246272	4.7807e-05	0.212848	0.0113189	0.722767	0.000187032		RHR2	1.22653	0.0273272	0.574139	0.00144075	0.703024	0.0405134
RIM101	0.512342	0.00121297	0.70504	0.116885	0.883908	0.0124328		RIM101	0.67261	0.00168599	0.602328	0.000412502	0.866736	0.0196619
RNR22	10.9851	0.0030608	0.798254	0.15077	0.912117	0.075705		RNR22	0.70483	0.000436532	0.854299	0.000124334	0.737416	0.00332817
ROB1	4.79996	0.000348017	0.000671826	0.000495446	1.87546	0.000125082		ROB1	8.66248	2.9737e-05	0.0236353	1.08885e-05	1.44909	0.02501
RPN4	2.10034	3.7363e-05	0.95319	0.00574704	2.79477	0.0430134		RPN4	7.87306	0.000506352	7.00231	0.0166703	6.80459	0.000622635
RTA3	0.204459	0.0793344	1.75768	0.00209999	9.44504	0.217686		RTA3	0.355169	0.103494	0.566771	0.0357775	0.202954	0.180252
SAP1	1.184	0.247014	1.25915	0.0568756	2.56429	0.400829		SAP1	0.214304	0.00424661	0.0777549	0.000958307	0.0268227	0.00782611
SAP10	1.98058	0.00595015	1.21163	0.00348609	2.62159	0.243147		SAP10	2.03591	0.22283	2.55082	0.0512326	1.41758	0.456211
SAP2	0.139725	0.0549185	0.138817	0.0925032	0.130306	0.119268		SAP2	97.1335	0.0536303	1.16817	0.0357775	0.402976	0.180252
SAP4	0.0128953	0.00263557	0.0128115	0.0130707	0.151855	0.00829146		SAP4	0.00119604	0.00107971	0.0191757	0.000431916	0.000683453	0.0030015
SAP5	0.000403012	0.000348017	0.0137217	0.00123425	0.0218456	0.00150391		SAP5	0.000276929	0.00335977	0.00724389	0.000958307	0.016267	0.00782611
SAP6	0.00181376	9.0628e-05	0.00180197	0.000328545	0.0181947	0.000282104		SAP6	0.00122649	0.00730352	0.00203166	0.00238674	0.000700853	0.0190553
SAP9	0.454791	4.1161e-05	0.607457	0.0546192	1.05163	0.00271599		SAP9	0.650666	0.00085932	0.47995	0.000183871	1.06741	0.031917
SCW11	4.1962	0.000288142	1.92698	0.00200761	2.50954	0.0217221		SCW11	2.28078	0.127483	1.20732	0.00258481	1.41107	0.249463
SCW4	0.00318678	0.000130442	0.0308867	0.0375257	0.300407	0.000651983		SCW4	27.8715	0.000151668	1.1865	0.0196395	2.60941	0.331537
SEF1	1.1358	0.211661	0.434007	0.405452	1.02514	0.00268619		SEF1	2.45939	0.234257	0.650587	0.00601864	1.01811	0.185138
SEF2	0.435634	0.00453205	1.01406	0.0818489	0.761376	0.399541		SEF2	4.95371	0.062598	1.91289	0.00692286	2.98033	0.0975402
SGA1	0.458716	0.00442005	0.908063	0.15077	0.856431	0.0529832		SGA1	1.45773	0.0331612	1.00973	0.00224788	0.598348	0.0321455
SIN3	1.95152	0.00133661	1.40069	0.00381402	1.4782	0.0311946		SIN3	3.69738	0.141228	2.30406	0.000482725	2.0058	0.325505
SIT1	0.317453	0.00024189	0.994999	0.0120764	1.77087	0.153422		SIT1	0.824102	0.038202	0.495741	0.00660135	1.45206	0.421098
SMC2	3.0592	0.00573851	0.915094	0.0237383	1.43929	0.26912		SMC2	1.56351	0.158708	1.68616	0.0375439	0.217905	0.128824
SOD4	2.0568	0.00472375	2.48369	0.0599464	3.98193	0.0949156		SOD4	1.36416	0.0123759	0.832291	0.000309337	2.23369	0.198911
SOD5	0.176556	0.000348017	0.663277	0.00437757	0.465373	0.0117577		SOD5	0.0326855	0.000293496	0.0396305	0.000116399	0.07933	0.000970232
SOD6	1.04302	0.201563	0.405128	0.0118147	0.581469	0.0047686		SOD6	0.254812	0.0317352	0.620324	0.010748	0.764443	0.172056
SOG2	1.82695	0.0214384	0.942697	0.00418357	1.27437	0.0604715		SOG2	2.14041	0.114579	1.3805	0.00462271	1.22562	0.19566
SSB1	0.868408	0.0137133	0.710131	0.0155758	0.655415	0.00277247		SSB1	2.66088	0.271213	1.36744	0.00110825	1.74017	0.566429
STF2	1.63427	0.00685327	1.39948	0.203817	0.962547	0.0836002		STF2	1.06771	0.0379327	2.09953	0.0161732	1.82255	0.68958
STP2	2.02189	0.000424724	1.0592	0.0925032	1.13871	0.198612		STP2	1.68914	0.0575128	1.23199	0.00444534	1.1053	0.164573
SUT1	3.18852	0.00307179	1.42213	0.0142255	1.53389	0.18435		SUT1	17.539	2.5124e-05	2.74815	0.00138142	1.80039	0.619661
TEC1	0.107914	4.6228e-05	0.987459	0.405452	1.03101	0.26486		TEC1	0.0249607	0.0238662	0.18568	0.00739115	0.20952	0.0628522
TPK1	0.830707	0.021227	0.407241	0.366562	1.06063	0.00357215		TPK1	2.86253	0.392677	1.07939	0.0195171	2.79443	0.246823
TPK2	3.78033	0.000172136	1.66412	0.0148903	1.55197	0.0264185		TPK2	2.03818	0.0368531	1.25572	0.000915783	1.40648	0.180252
TPS2	0.59245	0.000769993	1.00178	0.00348609	0.561687	0.322968		TPS2	0.195826	2.9328e-05	1.49445	4.89667e-05	0.86251	0.0027199
TRR1	0.902042	0.071765	0.788089	0.0346324	1.31373	0.075705		TRR1	2.04774	0.0620907	0.473641	0.000915783	0.634912	0.0258055
TRX1	2.49875	0.00064204	1.81105	0.00114925	2.31254	0.0366592		TRX1	2.80707	0.144142	1.35053	0.000124334	2.11644	0.21546
TTR1	0.68332	0.000733324	1.14816	0.000754948	1.50396	0.300261		TTR1	1.61597	0.0185118	1.31679	0.00121427	1.75209	0.582968
TUP1	3.03569	4.006e-05	1.68472	0.000870182	1.81027	0.0116397		TUP1	2.10935	0.0379327	1.52853	0.000910137	1.36128	0.131252
TYE7	1.22092	0.106538	1.00201	0.00460506	1.52727	0.321844		TYE7	0.68859	0.00744451	1.99099	0.0053743	1.39792	0.245475
UCF1	3.41666	0.000127748	1.72716	0.372588	1.00121	0.00903689		UCF1	2.10183	0.0361	2.08862	0.00142994	2.22083	0.208698
UGA32	0.43744	0.00603516	1.94022	0.303362	1.06573	0.00903689		UGA32	3.40117	0.434554	1.3722	0.0163554	0.72524	0.149106
UGP1	0.803699	0.0120801	1.2212	0.23653	1.08889	0.171583		UGP1	0.769239	0.000990457	1.42263	0.000431916	1.16346	0.0415182
UME6	0.00492017	0.000127748	0.0613431	0.000638114	0.123744	0.000689634		UME6	0.00639776	0.000229152	0.152426	9.7902e-05	0.104496	0.000858335
UPC2	4.50082	0.0016137	0.841164	0.0762267	0.887142	0.0577921		UPC2	0.832729	0.0379327	0.886088	0.00824891	1.02516	0.19566
WH11	0.00497496	3.7363e-05	0.787069	0.297176	0.944597	0.0185317		WH11	0.126333	0.0806258	0.820225	0.0360857	1.10346	0.407818
YHB1	0.142266	5.8831e-05	0.24669	0.000177331	0.0904919	0.000106162		YHB1	5.55569	0.0572163	1.06283	0.00692286	0.762589	0.11582
YWP1	72.8765	3.7363e-05	67.3662	0.00385499	50.9047	0.00125002		YWP1	1.42431	0.202844	26.1019	0.00041373	8.83413	0.0104991
ZAP1	0.884523	0.190239	2.05528	0.0874097	1.25071	0.00175901		ZAP1	1.15387	0.147254	0.475794	0.0288478	0.515848	0.213163
ZCF20	2.01739	0.00204009	1.08246	0.00460506	1.59889	0.490921		ZCF20	2.00003	0.139853	0.459656	0.00544453	0.832719	0.138977
ZCF3	1.26813	0.141477	0.650763	0.0403934	1.26726	0.0409333		ZCF3	4.00311	0.114263	1.23536	0.000958307	2.13648	0.295557
ZCF31	6.55519	0.000150288	0.952527	0.0703806	1.30171	0.330215		ZCF31	1.65609	0.078544	0.031624	0.00302689	0.170225	0.030047
ZCF34	1.26429	0.158556	1.35891	0.00733472	1.53109	0.228862		ZCF34	2.31017	0.273748	1.50001	0.0293515	0.400517	0.139531
ZCF39	0.665038	0.000533176	1.11201	0.121641	1.08748	0.354515		ZCF39	0.837391	0.00244571	0.524538	0.000384333	0.68657	0.0119027
ZCF7	0.974549	0.214503	0.88625	0.417976	1.01792	0.271293		ZCF7	5.38821	0.210014	0.549966	0.0273154	0.160374	0.145991
ZRT1	0.169154	0.000591057	2.09949	0.0387783	1.82826	0.00903689		ZRT1	0.0725793	0.139853	0.0752117	0.0512037	0.132399	0.245475
ZRT2	0.344558	0.00501762	3.96216	0.0341899	1.70245	0.0105675		ZRT2	1.35486	0.190546	0.655952	0.038774	0.691069	0.277189
orf19.1424	1.14006	0.214503	1.30217	0.0196078	1.45488	0.162136		orf19.1424	3.14401	0.461551	1.85325	0.0167656	1.47714	0.439652
orf19.1534	1.02672	0.237337	2.06661	0.0230696	2.11127	0.0836002		orf19.1534	0.166853	0.069832	0.454485	0.0253729	0.700614	0.242783
orf19.1691	19.0933	0.0100558	0.176654	0.205647	0.558563	0.118325		orf19.1691	12.0399	0.0204096	13.6228	0.00552385	3.30791	0.38758
orf19.1862	0.20456	3.7363e-05	1.65678	0.13721	1.15625	0.0161018		orf19.1862	1.72515	0.00606643	2.05307	0.00057057	3.25237	0.0415182
orf19.2125	0.884677	0.0422928	0.779962	0.0346174	1.30613	0.00277247		orf19.2125	2.08596	0.0556084	1.49964	0.00142994	2.10662	0.367658
orf19.3615	0.821662	0.0136124	1.07755	0.15077	0.944334	0.484647		orf19.3615	1.32781	0.00462586	0.516226	0.000285196	0.608972	0.0119027
orf19.409	0.691991	0.000618815	0.511965	0.155229	1.12414	0.000776403		orf19.409	2.15211	0.0572163	1.40725	0.00130934	1.93099	0.581683
orf19.411	1.51029	0.0229225	2.73224	0.00070452	3.0358	0.00568795		orf19.411	0.456488	0.0040977	1.77972	0.00303588	1.38898	0.212714
orf19.4174	1.55091	0.036063	1.00083	0.15077	1.08035	0.154267		orf19.4174	0.661102	0.00711723	0.314715	0.00117541	0.570203	0.0261134
orf19.449	0.955602	0.141572	1.18465	0.0837682	1.17967	0.322968		orf19.449	0.86401	0.00335977	1.39428	0.000958307	0.87738	0.02501
orf19.4706	0.524112	0.0012491	0.865642	0.0728214	0.924452	0.134141		orf19.4706	0.963715	0.0156707	0.609039	0.00208455	0.953737	0.145991
orf19.5517	0.428915	0.0145613	0.792051	0.0390025	1.49431	0.137223		orf19.5517	1.87441	0.171426	0.496595	0.0136216	0.634731	0.165236
orf19.5626	2.57188	0.0020252	1.555	0.0237994	1.39339	0.0405542		orf19.5626	1.8059	0.137015	1.54991	0.0182644	1.2132	0.296139
orf19.5848	0.760538	0.0599688	0.511178	0.00551049	0.604476	0.00811811		orf19.5848	0.804469	0.0089075	1.35644	0.00302689	0.837222	0.057841
orf19.6578	0.154333	0.000134964	0.928153	0.00385499	0.575441	0.0934104		orf19.6578	0.150521	0.0069685	2.0411	0.0090914	1.19945	0.19566
orf19.6660	0.953027	0.0950586	1.20158	0.00514134	2.71488	0.102122		orf19.6660	1.33679	0.0327066	1.65849	0.00485813	1.9644	0.581683
orf19.670.2	0.561482	0.00307179	1.41252	0.312492	1.05156	0.114338		orf19.670.2	2.80684	0.126001	2.60532	0.000454918	1.57455	0.21546
ARP3	1.60628	0.00112911	1.25915	0.0109991	1.35766	0.132867		ARP3	1.80858	0.141658	1.05559	0.0141369	1.37657	0.404531
CLN3	1.25036	0.133254	1.07636	0.0109991	1.88793	0.484647		CLN3	1.12372	0.00829543	1.52715	0.00136878	1.37786	0.182689
CMK2	1.43349	0.0144598	1.1675	0.356044	0.996362	0.189996		CMK2	1.69696	0.148677	0.744208	0.0165275	0.963831	0.245475
YRA1	2.21742	0.000513219	1.39563	0.0188919	1.25804	0.148086		YRA1	5.40231	0.0379327	5.46422	0.204562	2.00019	0.57269
orf19.3456	0.41934	0.0209918	0.960167	0.0231479	1.61461	0.357341		orf19.3456	0.841642	0.178732	1.77356	0.0799663	0.116475	0.21546

## Sheet: EFG1-TEC1
Probe Name	In vitro		In vitro		In vitro				Probe Name	In vivo		In vivo		In vivo
	efg1Δ-EFG1/WT		tec1Δ-TEC1/WT		efg1Δ-EFG1 tec1Δ-TEC1/WT					efg1Δ-EFG1/WT		tec1Δ-TEC1/WT		efg1Δ-EFG1 tec1Δ-TEC1/WT
	FC	FDR	FC	FDR	FC	FDR				FC	FDR	FC	FDR	FC	FDR
ACE2	1.29194	0.119892	1.40678	0.082564	1.56753	0.0314925			ACE2	12.9093	1.65106e-05	1.50883	0.000110745	8.52154	0.000108694
ACS1	0.904938	0.267549	1.18229	0.133961	1.08014	0.290198			ACS1	1.70942	0.00280958	0.615497	0.000410027	1.49944	0.0121663
ACS2	1.30542	0.0140568	1.46258	0.00461862	1.37348	0.00313045			ACS2	0.877757	0.00222524	0.477231	0.00107229	0.833249	0.00656465
ADH5	1.20783	0.0998164	1.18936	0.150416	1.33973	0.0372543			ADH5	0.867345	0.000497831	1.49269	0.000988956	1.30647	0.00368889
AHR1	1.33293	0.119621	1.46536	0.0813103	1.24159	0.169669			AHR1	1.08988	0.00104135	1.27805	0.001132	0.50654	0.00151616
ALS1	0.634506	0.0523369	0.867819	0.144648	0.956949	0.364971			ALS1	2.29844	0.00997357	1.02832	0.00117953	1.9934	0.0412466
ALS2	0.986348	0.658061	0.777748	0.194201	1.91788	0.0488712			ALS2	0.0236355	0.000985029	0.0227633	0.000742994	2.38503	0.184904
ALS3	0.6128	0.0754389	0.527312	0.0347703	0.523075	0.0372543			ALS3	0.714443	5.3929e-06	0.508381	3.98367e-06	0.293249	8.59025e-06
ALS4	1.81449	0.0337809	3.64778	0.00381203	3.26721	0.00462926			ALS4	0.773044	0.0122005	0.635292	0.00924594	0.677655	0.0288009
ALS5	0.667651	0.132893	0.677105	0.102837	1.0197	0.572485			ALS5	0.0122773	0.00233895	0.0116975	0.00195536	0.0116975	0.00511514
ALS6	0.114763	0.30941	0.114763	0.256744	0.114763	0.242795			ALS6	1	0.146277	1	0.128723	1	0.275
ALS7	0.970762	0.46079	0.85397	0.0273723	0.887191	0.0664003			ALS7	1.65842	0.0159579	0.891784	0.00580031	1.14681	0.0291772
ALS9	0.890111	0.616332	1.29223	0.478239	1.88641	0.200626			ALS9	0.0144009	0.000774098	0.0144014	0.000553948	0.0144014	0.00176545
AOX2	0.121177	0.00400052	0.216017	0.00237227	0.129952	0.00184994			AOX2	2.70853	0.00212995	0.701611	2.13573e-05	0.969741	0.000159641
ARG1	1.7729	0.00487891	1.28455	0.00237227	1.53532	0.00760283			ARG1	0.73202	0.000571178	0.450165	0.00016189	1.52089	0.0165274
ARG81	1.14166	0.226638	1.21744	0.173752	1.29679	0.0667092			ARG81	0.00436129	0.00166511	0.851113	0.00198769	0.484599	0.0039623
BCR1	1.44171	0.0065923	1.27755	0.018938	1.43816	0.00967855			BCR1	2.23656	0.0116871	1.50809	0.00321421	1.33366	0.013748
BRG1	1.13113	0.276187	1.1064	0.422984	1.21835	0.135345			BRG1	1.33666	0.00289566	1.32001	0.00241686	0.887946	0.00532612
CAP1	1.08602	0.377015	1.33795	0.0623087	1.29661	0.0602087			CAP1	1.29193	0.000215718	1.19672	0.000164078	0.881987	0.000386705
CAT1	1.23182	0.0406682	1.48386	0.0110548	1.61738	0.00741219			CAT1	1.08657	0.00088643	0.489297	0.000290091	1.16052	0.00451764
CDC10	1.38043	0.0962445	1.06305	0.559085	1.0437	0.51819			CDC10	0.00201303	0.00209374	0.00201316	0.00165188	0.00201316	0.00430911
CDR1	0.868134	0.138562	1.10187	0.297522	0.900691	0.12367			CDR1	1.63912	0.000208486	0.982086	3.70103e-05	1.08413	0.00024316
CDR2	0.056078	0.220711	0.056078	0.182456	0.165668	0.200684			CDR2	0.0571889	0.00821551	0.0571889	0.00676068	0.0571889	0.017443
CHT2	0.618495	0.00487891	0.492128	0.00271981	0.363598	0.00184994			CHT2	0.00169334	0.0212544	0.12787	0.0188974	0.285598	0.0510009
CHT3	1.11695	0.377015	1.14971	0.377131	1.4747	0.0654701			CHT3	1.50372	0.000898581	1.20259	0.000156597	3.22074	0.174005
CIT1	1.06633	0.0681654	1.29233	0.00695017	1.11413	0.0355419			CIT1	1.94421	0.000462906	0.722472	3.73904e-05	1.24927	0.000548447
CPH1	0.918311	0.383766	0.735471	0.0652659	0.759451	0.0726577			CPH1	0.00824795	0.00114972	0.00824829	0.000424613	0.526277	0.00362866
CPH2	1.15874	0.0583942	1.14768	0.11218	1.37973	0.00967855			CPH2	3.37717	0.0386977	3.019	0.0203806	5.52482	0.00130297
CRH11	1.55003	0.0182771	1.18856	0.144648	1.21821	0.0732642			CRH11	1.86151	0.00222524	1.04583	0.000410027	1.29132	0.00366595
CSA1	0.85225	0.0988552	0.91376	0.102837	0.840332	0.0564544			CSA1	0.863583	0.0248996	1.01426	0.0238543	1.14835	0.0772489
CSH1	1.00531	0.444	0.994173	0.144648	1.40593	0.00397152			CSH1	0.740382	0.0118979	0.535504	0.00852026	0.960077	0.0388165
DAK2	1.08258	0.132893	0.996963	0.265213	1.04563	0.342824			DAK2	0.00326783	0.00013636	0.532151	0.000172061	2.36508	0.042024
DDR48	1.37822	0.0681654	1.0692	0.525335	0.883631	0.240388			DDR48	0.491516	0.00601624	0.543332	0.00509633	0.695756	0.0193168
DFG5	1.79061	0.0223417	1.67204	0.030479	1.52033	0.0451998			DFG5	0.719454	0.00464143	0.715076	0.00305997	1.14161	0.0201797
ECE1	0.785332	0.0140568	0.514858	0.00271981	0.557641	0.00313045			ECE1	0.435006	1.65106e-05	0.744707	1.88467e-05	0.278184	3.64832e-05
ECM331	1.36779	0.111146	0.622862	0.0813103	0.88072	0.29263			ECM331	0.725029	8.17534e-05	0.621852	6.49019e-05	0.372811	8.59315e-05
EFG1	0.752078	0.16761	1.25793	0.177023	0.793137	0.151012			EFG1	0.646885	0.000774098	0.969218	0.000877527	0.615199	0.00225818
ELF1	0.459982	0.0065923	0.47785	0.00461862	0.484315	0.00534257			ELF1	3.58045	0.120228	0.00757283	1.13496e-05	3.18248	0.203373
ENA2	1.1773	0.0523565	1.34709	0.0187055	1.24533	0.0272685			ENA2	1.99354	0.000810965	2.11037	0.00111545	2.27214	0.0252347
ENA21	1.07954	0.014517	1.30042	0.0109113	1.15624	0.0117312			ENA21	1.66814	0.00233895	1.58662	0.0017576	1.516	0.0101011
FAV2	0.726668	0.0461348	0.350832	0.00271981	0.44643	0.00350303			FAV2	0.404979	0.000255931	0.00726861	0.000178475	0.45736	0.00151616
FBP1	1.21708	0.16761	1.1866	0.245612	1.31366	0.0829085			FBP1	1.50509	0.000215718	0.913513	9.09665e-05	1.49321	0.00151616
FDH1	0.464531	0.00487891	0.440669	0.00271981	0.354449	0.00275649			FDH1	1.48536	0.00169724	0.782861	0.000432248	1.65401	0.0152105
FGR15	0.964122	0.508644	1.02331	0.507412	0.907616	0.211367			FGR15	0.0192701	0.00123262	0.0191224	0.000969793	0.0191224	0.00286651
FKH2	1.08816	0.409986	1.19661	0.0131511	1.42956	0.0048319			FKH2	0.011731	0.000287236	0.0105376	0.000200471	0.0105376	0.000605858
FRP1	0.943729	0.516152	1.00082	0.494	0.931615	0.351006			FRP1	1.43333	0.0098684	3.2098	0.061984	2.04161	0.0922006
FRP2	1.04429	0.0677862	1.26014	0.00384889	1.07813	0.0372543			FRP2	1.22533	0.0200465	0.973931	0.0136703	1.00521	0.0451061
FRP3	1.00648	0.593911	1.197	0.10176	1.23525	0.0511729			FRP3	2.35198	0.00123262	0.522972	3.70103e-05	1.27935	0.00135985
FTR1	0.543641	0.0406682	0.605689	0.0343648	0.452796	0.0211208			FTR1	1.16694	0.000561052	0.999816	0.000264396	1.18588	0.00225818
GAL1	1.17526	0.113312	0.934412	0.202007	1.1991	0.0885516			GAL1	0.942697	0.000825297	0.91731	0.000614744	0.89728	0.00287051
GAL4	1.35273	0.0065923	1.20997	0.00284329	1.34513	0.00782743			GAL4	0.844729	5.29044e-06	0.943088	4.37615e-06	0.787961	1.34434e-05
GAP2	1.49967	0.0065923	2.14581	0.00271981	1.46366	0.0128915			GAP2	1.43121	0.0074621	0.717382	0.00242541	3.26297	0.218258
GCA2	0.702152	0.220693	0.730387	0.181951	0.804656	0.245017			GCA2	0.61685	0.0064081	0.356921	0.00364837	0.775098	0.0192736
GCN4	1.75326	0.039403	2.24386	0.0122542	1.51003	0.0564544			GCN4	1.71672	8.67501e-06	1.05138	3.98367e-06	0.940545	9.40208e-06
GIS2	0.951002	0.15758	0.960922	0.0268152	1.04779	0.103399			GIS2	2.14026	0.00226057	0.50002	0.000156284	1.74675	0.00852304
GNP1	1.04264	0.47254	1.00497	0.478239	1.13323	0.22448			GNP1	1.52254	0.000694357	1.20399	0.000290091	2.23053	0.0316773
GPD2	0.28913	0.014517	0.259501	0.0109113	0.274258	0.0109353			GPD2	3.01707	0.0433185	1.3815	0.0032585	2.04309	0.0618606
HAC1	1.05429	0.0791231	0.974268	0.0238041	1.00435	0.209523			HAC1	1.73941	0.000570266	0.800821	9.92691e-05	1.64106	0.00252731
HAP2	1.28964	0.0205499	1.2916	0.0250453	1.18875	0.0471742			HAP2	1.89747	0.00821551	2.27549	0.0118814	2.73714	0.203373
HAP3	0.71544	0.220711	0.951068	0.441592	0.511253	0.0685542			HAP3	0.023465	0.00153286	0.021813	0.00114233	0.021813	0.00342896
HAP43	0.964126	0.391246	0.969083	0.133961	0.856333	0.0574832			HAP43	1.8709	0.00463803	1.06756	0.00104966	0.995153	0.00368889
HEM1	0.758739	0.0406682	0.814768	0.0523667	0.721012	0.0213055			HEM1	0.857823	0.00132469	0.550926	0.00017918	1.46499	0.00384738
HGT7	0.124794	0.0215722	0.137055	0.0177438	0.181747	0.0196568			HGT7	1.79965	0.0064081	1.83452	0.00552453	1.24603	0.012141
HOG1	1.00359	0.562846	0.984379	0.205268	1.02528	0.483606			HOG1	0.488247	0.00209374	0.0135541	0.000634394	0.449008	0.00368889
HSP104	1.39861	0.078708	2.05421	0.012558	2.79291	0.00437728			HSP104	12.5527	0.000182853	3.0103	0.0406778	15.0987	9.40208e-06
HSP70	1.37656	0.100389	1.64955	0.0347703	1.87495	0.0196568			HSP70	4.93942	0.0451283	2.03954	0.00202729	4.63971	0.00368889
HTA1	0.996723	0.663081	0.822859	0.133365	0.895211	0.241705			HTA1	0.775166	3.18802e-06	0.757309	3.98367e-06	0.969158	8.59025e-06
HTA2	0.877405	0.30941	0.719253	0.0677494	0.792036	0.106923			HTA2	1.0091	1.65106e-05	0.557693	4.42613e-06	0.942305	5.16046e-05
HWP1	1.0894	0.357802	0.684665	0.0572944	0.714404	0.0664003			HWP1	0.701847	5.59507e-05	0.712923	3.70103e-05	0.630233	0.000108694
HYR1	0.637317	0.0167054	0.147587	0.00271981	0.158161	0.00313045			HYR1	0.217795	0.00831694	0.524482	0.00900303	0.203374	0.0184325
IFD6	0.156303	0.0247242	0.0770777	0.0177438	0.337336	0.03315			IFD6	0.19191	0.00161646	0.976502	0.00258538	1.41121	0.0230356
IHD1	1.03483	0.383766	0.73781	0.0188569	0.850606	0.0588752			IHD1	1.06402	0.00131226	0.618832	0.000489931	0.655954	0.00225818
INO4	1.50074	0.00823819	1.59012	0.00461862	1.49512	0.0117312			INO4	0.00706509	0.000774098	0.00706558	0.000394716	0.8388	0.00616987
IRE1	1.37849	0.117653	1.48906	0.0837064	1.51482	0.0646736			IRE1	0.493677	0.000338662	0.319325	0.000156597	1.25478	0.00339968
IRO1	2.29445	0.0065923	1.75237	0.0109113	1.00681	0.548669			IRO1	2.49496	0.00196396	1.34665	0.000281084	0.789447	0.000137483
KIP4	0.808393	0.0747759	0.594772	0.0109113	0.622224	0.0112635			KIP4	0.940868	0.000497295	1.34854	0.000781235	0.578126	0.00074754
KRE1	0.576585	0.0247242	0.554455	0.0128782	0.415974	0.00924166			KRE1	1.023	0.000570266	0.535519	0.000207949	0.21133	0.000416743
MAC1	1.21206	0.134631	1.01702	0.507412	0.986102	0.463638			MAC1	0.00788317	0.00305304	0.00734748	0.00245683	0.00734748	0.00656465
MAE1	1.06117	0.355453	0.905327	0.144648	1.22867	0.0592405			MAE1	1.25903	0.000812888	0.607707	0.00026389	1.63335	0.00890766
MBF1	0.861852	0.0297623	0.927798	0.0322077	0.838151	0.0211208			MBF1	0.998233	5.88055e-06	1.14578	4.37615e-06	0.841325	1.34434e-05
MDM34	1.36937	0.0134706	1.4372	0.0109113	1.48875	0.00760283			MDM34	1.28513	0.000470509	1.36024	0.000330722	1.13526	0.00151616
MET28	1.69324	0.0065923	1.95453	0.00349198	1.78058	0.0048319			MET28	1.58736	2.53041e-05	1.01915	4.37615e-06	1.5389	8.59315e-05
NDT80	1.0386	0.327651	0.983571	0.181739	0.977395	0.241705			NDT80	2.82118	0.00746106	1.17879	0.000197704	2.74606	0.145263
NPR1	0.980177	0.562846	1.15662	0.103084	1.17375	0.0549084			NPR1	0.467375	0.00013636	0.792328	0.000224689	0.00505362	8.59315e-05
NRG1	1.42269	0.0205499	1.44618	0.020587	1.69701	0.00760283			NRG1	1.63387	0.0202189	3.16121	0.0683733	2.02472	0.110765
PCK1	1.55305	0.00400052	1.46017	0.00271981	1.58431	0.00184994			PCK1	1.18899	7.87901e-05	0.726095	3.69955e-05	1.50793	0.000737058
PES1	0.59518	0.0706251	0.588912	0.0652659	0.693661	0.0872494			PES1	0.263388	0.0154803	0.263388	0.0132008	0.263388	0.0316773
PFK2	0.77412	0.0583942	0.741833	0.0258053	0.860778	0.0751757			PFK2	2.436	0.0105242	2.70545	0.0170083	2.02518	0.0377452
PGA13	0.676794	0.00707584	0.548412	0.00271981	0.4131	0.00278093			PGA13	0.378325	0.00678128	1.2759	0.0132008	0.481949	0.0184325
PGA17	1.37505	0.014517	1.59908	0.0109113	1.92388	0.00313045			PGA17	2.37048	0.0874604	0.0173438	0.00477297	0.0173438	0.012537
PGA25	1.96694	0.0065923	1.92532	0.0109113	2.74336	0.00422157			PGA25	0.0226688	0.0114527	0.0212181	0.00616373	2.49974	0.213607
PGA34	1.17142	0.0406682	0.741282	0.0177438	0.923631	0.118383			PGA34	2.24708	0.000694357	0.979361	3.70103e-05	1.9805	0.00380715
PGA37	0.140225	0.0065923	0.166201	0.00442205	0.183552	0.0048319			PGA37	0.00682916	0.000774098	0.966081	0.00122447	1.6058	0.0240122
PGA48	1.35731	0.0681654	1.17933	0.235359	1.81847	0.0128191			PGA48	0.749508	0.000287236	0.875734	0.000240662	0.929955	0.00139296
PGA53	0.943492	0.425184	0.863158	0.102837	0.763262	0.0511729			PGA53	0.421239	0.00510542	0.0828629	0.00241686	1.10264	0.0265098
PGA7	0.920924	0.30912	0.966189	0.25353	0.938806	0.237839			PGA7	0.835584	0.00946377	1.00809	0.00923781	0.822806	0.0252401
PHO89	1.32353	0.18923	1.7715	0.0451395	1.63455	0.0583789			PHO89	2.26244	0.0104663	1.33916	0.00241686	0.628164	0.00287051
PHR1	1.27581	0.21906	1.11054	0.480684	1.16897	0.306223			PHR1	1.02922	0.00227934	0.633043	0.00105716	0.561575	0.00359277
PHR2	1.17172	0.177902	1.0851	0.478239	1.07391	0.387214			PHR2	1.79626	0.000520043	1.72332	0.000489931	2.09305	0.00995408
PIL1	0.721398	0.00646158	0.746281	0.00254119	0.738815	0.00184994			PIL1	0.6816	0.000812888	0.495069	0.000474025	0.871051	0.00359277
PIR1	0.942026	0.377065	0.896558	0.108781	0.879965	0.103776			PIR1	0.681138	0.00273641	0.91172	0.00284293	0.502581	0.00605494
PLB5	1.56031	0.0065923	1.02145	0.173964	1.21953	0.0138034			PLB5	0.976094	0.000774098	0.39805	0.000200471	0.501956	0.00102634
POL1	1.09698	0.220711	0.85765	0.0325732	1.03062	0.485303			POL1	0.0121587	0.000983374	0.0108817	0.00074047	0.0108817	0.00225818
PRA1	0.0199709	0.0190411	0.239552	0.0247333	0.585714	0.0885516			PRA1	0.456177	0.0293666	0.878183	0.0321592	0.306557	0.0575682
RBR1	1.70588	0.0190411	0.313992	0.0169043	1.65379	0.0294526			RBR1	5.24734	0.0428315	0.078819	0.000424613	2.10248	0.105671
RBR2	1.59883	0.0106173	2.04349	0.00271981	1.70087	0.00741219			RBR2	0.794276	0.0064081	0.00663621	0.00196593	1.83993	0.0680442
RBT1	1.39661	0.0127292	1.15476	0.11218	1.29415	0.0244294			RBT1	0.0297589	0.000720487	0.0277559	0.000489931	0.0277559	0.00161591
RBT5	1.27559	0.00400052	1.26728	0.00271981	1.1912	0.00371862			RBT5	0.914116	0.0123692	1.35611	0.0155415	1.33561	0.0566531
RCT1	1.28788	0.142768	1.05832	0.560598	0.988553	0.51819			RCT1	0.852406	0.00561136	0.879673	0.00458457	1.07401	0.0222289
RFG1	1.0844	0.44576	1.15246	0.37193	1.07866	0.435506			RFG1	1.81091	0.000609588	0.520241	5.3002e-05	0.928611	0.000517491
RFX2	0.822854	0.147242	0.781527	0.0726942	0.670019	0.0471742			RFX2	0.447643	0.000189551	0.33853	7.90643e-05	0.280247	0.00022479
RHR2	0.30932	0.00487891	0.295986	0.00271981	0.28675	0.00278093			RHR2	2.83216	0.0171307	1.0509	0.000550893	2.06523	0.0349889
RIM101	1.08986	0.350283	1.04134	0.587344	1.08429	0.351006			RIM101	1.11995	0.000182853	1.46436	0.000252975	1.48477	0.00211636
RNR22	1.0649	0.333483	0.995475	0.370435	1.30138	0.0323787			RNR22	0.557376	1.65106e-05	1.08254	2.21119e-05	0.821203	8.59315e-05
ROB1	1.1432	0.0906857	1.14527	0.133019	1.22745	0.0451998			ROB1	0.645789	9.03623e-06	0.605968	4.37615e-06	0.744324	7.17783e-05
RPN4	1.06878	0.106672	1.0989	0.139619	0.942968	0.0879214			RPN4	3.85261	0.0838934	1.33961	0.000207949	1.47879	0.00281164
RTA3	0.185719	0.329361	1.07548	0.582654	2.27108	0.177236			RTA3	0.110123	0.0155968	0.110123	0.0132464	0.110123	0.0318134
SAP1	0.428101	0.383766	1.56649	0.39736	2.09272	0.166717			SAP1	0.014554	0.000215718	0.014554	0.000156597	0.014554	0.00043677
SAP10	1.55572	0.0500538	1.8097	0.0177438	1.60799	0.0304385			SAP10	0.0600415	0.00416546	0.0600415	0.00316813	0.0600415	0.00861417
SAP2	0.126918	0.26844	0.126918	0.222124	0.126918	0.209523			SAP2	0.218654	0.0155221	0.218654	0.0132008	0.218654	0.0316773
SAP4	0.244737	0.0775642	0.0428494	0.0367158	0.3179	0.0654701			SAP4	1.54461	0.000660215	0.560354	0.000103968	2.21684	0.0624878
SAP5	0.932557	0.479878	0.466499	0.0302098	0.422692	0.0281185			SAP5	0.848055	0.000673394	0.803185	0.000386975	0.717791	0.00168198
SAP6	1.06816	0.30941	0.202081	0.00461862	0.399713	0.00844966			SAP6	1.01418	0.00209374	0.432575	0.000671426	0.626064	0.00347735
SAP9	1.04792	0.0738171	1.01973	0.229919	0.939898	0.0549084			SAP9	1.15439	9.2134e-05	1.06829	5.3002e-05	0.827662	0.000159641
SCW11	1.23895	0.212455	1.038	0.582654	1.36069	0.100122			SCW11	0.396039	0.000435558	0.479171	0.000281084	0.00499269	0.000435942
SCW4	1.69316	0.0140568	2.14432	0.00678057	2.39573	0.00534257			SCW4	1.89785	0.0412049	0.0101731	0.00245683	1.59701	0.0665962
SEF1	1.17374	0.119892	1.03082	0.559085	0.926305	0.240388			SEF1	1.50289	0.00831694	0.670957	0.00179148	0.701083	0.00646899
SEF2	0.3906	0.0065923	0.549822	0.00442205	0.449629	0.00397152			SEF2	1.21443	0.00463544	1.46291	0.00288547	1.12974	0.00822455
SGA1	0.864817	0.188669	0.774994	0.057546	0.785409	0.0564544			SGA1	0.00639795	0.00047037	0.848514	0.000645796	0.00639837	0.000474558
SIN3	1.04869	0.40373	1.07252	0.46374	1.15377	0.115946			SIN3	0.669236	4.96629e-05	0.49127	1.02691e-05	0.857933	8.59315e-05
SIT1	0.514104	0.0127292	0.684811	0.0183508	0.499316	0.00844966			SIT1	1.50562	0.00774106	0.792078	0.00245683	1.00776	0.0136863
SMC2	1.09249	0.409986	0.838696	0.224347	1.03145	0.535865			SMC2	0.0172215	0.00582237	0.0171038	0.00464226	0.0171038	0.0122125
SOD4	0.964054	0.616543	1.27788	0.250857	0.637642	0.126915			SOD4	0.543683	8.17534e-05	0.320368	2.88487e-05	0.69271	0.00026336
SOD5	0.778175	0.134631	0.844607	0.139619	0.539174	0.0281185			SOD5	0.431254	2.41519e-05	0.678822	2.17502e-05	0.425081	5.69971e-05
SOD6	1.50578	0.0516842	1.40889	0.0787217	1.20654	0.189936			SOD6	0.931589	0.00572839	1.23083	0.00642612	1.45011	0.03634
SOG2	1.22516	0.0988552	1.08293	0.273775	1.19615	0.0149291			SOG2	0.0055334	0.000629151	0.319434	0.000386975	0.487601	0.00225818
SSB1	0.764137	0.0572504	0.752988	0.0255009	0.798392	0.0444			SSB1	1.53596	0.000656865	0.734675	0.00014506	1.44788	0.00281164
STF2	1.16937	0.078708	1.28865	0.0350958	1.30342	0.0323787			STF2	1.10318	0.00280958	1.4377	0.00346275	1.14255	0.0110991
STP2	1.38976	0.0065923	1.50655	0.00348104	1.60375	0.00278093			STP2	1.38463	0.00216768	1.41564	0.00184068	1.34064	0.0090463
SUT1	0.941211	0.531063	0.729003	0.127806	1.16416	0.285398			SUT1	1.83836	0.000694357	1.12859	0.000130565	0.585194	8.59315e-05
TEC1	1.01593	0.460719	0.796888	0.0187183	0.714852	0.0117312			TEC1	0.813336	0.00464143	0.859025	0.00380678	0.393798	0.00728915
TPK1	0.866128	0.327301	0.890501	0.223966	0.89105	0.254119			TPK1	4.96463	0.0845677	2.8995	0.0558126	3.1151	0.257466
TPK2	1.13296	0.355453	1.06188	0.559085	1.1746	0.250741			TPK2	0.00291938	7.63011e-05	0.423206	6.63371e-05	0.41989	0.000242785
TPS2	0.578293	0.02274	0.572257	0.0168021	0.501778	0.012518			TPS2	0.901671	5.29044e-06	1.07393	4.37615e-06	0.615497	8.59025e-06
TRR1	0.711785	0.134631	0.728335	0.107598	0.657319	0.0700707			TRR1	1.20304	0.00100195	0.466321	0.000162082	0.625799	0.000737058
TRX1	0.771155	0.138384	0.781079	0.102837	0.804009	0.121317			TRX1	1.72671	0.000182853	0.533613	6.0801e-06	0.797842	5.48001e-05
TTR1	0.789117	0.0315173	0.851136	0.0154561	0.915016	0.0549224			TTR1	0.562253	0.000182853	0.203742	6.87322e-05	0.752415	0.000602978
TUP1	1.78664	0.00487891	1.73879	0.00271981	1.77357	0.00278093			TUP1	1.08184	0.000182853	0.534471	4.85083e-05	1.71707	0.00347735
TYE7	0.559662	0.0222695	0.708024	0.0314854	0.65362	0.0281185			TYE7	1.28701	0.00100195	0.960055	0.000474025	1.02692	0.00281164
UCF1	0.943687	0.516152	0.969678	0.420355	1.07917	0.398907			UCF1	1.19097	0.000182853	1.71073	0.000282077	1.1967	0.00074754
UGA32	1.04912	0.46079	1.22293	0.262364	1.0479	0.474523			UGA32	0.0134556	0.002076	0.0118522	0.00160448	0.0118522	0.00419353
UGP1	0.832907	0.220711	0.719684	0.0713656	0.854443	0.181479			UGP1	0.903235	6.62258e-05	0.825609	3.70103e-05	0.872291	0.000159641
UME6	0.727614	0.067049	0.470396	0.0127281	0.512091	0.0250887			UME6	1.19528	8.17534e-05	0.295778	1.13496e-05	0.236314	3.65758e-05
UPC2	3.04365	0.00400052	2.10622	0.00678057	2.14686	0.010836			UPC2	1.15284	0.00464143	1.114	0.00384689	0.585693	0.00646899
WH11	1.53574	0.0065923	2.06006	0.00254119	2.46294	0.00184994			WH11	0.352288	0.0128248	0.29824	0.0106044	0.867158	0.0478162
YHB1	0.177244	0.00400052	0.154535	0.00254119	0.183309	0.00192804			YHB1	0.940741	0.00233895	1.26836	0.00285339	0.994304	0.00867399
YWP1	1.41174	0.0140568	1.32871	0.0343019	1.47921	0.0185229			YWP1	0.342645	0.0164132	0.146744	0.0124215	0.168425	0.0316773
ZAP1	0.621913	0.078708	0.508621	0.0426125	1.08405	0.500132			ZAP1	0.306264	0.0122525	0.349806	0.0100962	0.274606	0.0252347
ZCF20	1.24826	0.106672	1.19223	0.200396	1.30971	0.0632294			ZCF20	0.409889	0.00209374	0.236147	0.00107229	0.454763	0.00472516
ZCF3	0.909711	0.380681	0.896819	0.206534	0.812376	0.121693			ZCF3	1.40335	0.00525054	0.498772	0.000108982	1.14218	0.00368889
ZCF31	1.92061	0.020151	1.64249	0.0451395	1.69628	0.0323787			ZCF31	0.00591878	0.000774098	0.0059193	0.000550893	0.0059193	0.00176536
ZCF34	1.17774	0.227846	1.10464	0.441592	1.26793	0.200626			ZCF34	0.0209507	0.00464143	0.0207765	0.00364837	0.0207765	0.00986712
ZCF39	0.959306	0.432031	1.00011	0.335511	1.04863	0.332379			ZCF39	0.539862	8.79728e-05	0.880738	8.06123e-05	0.686162	0.00024316
ZCF7	0.962852	0.627521	0.880638	0.424761	1.00206	0.566837			ZCF7	0.0870188	0.0105889	0.0870188	0.00900303	0.0870188	0.0222289
ZRT1	0.53769	0.111722	0.572108	0.0127281	0.746	0.0732642			ZRT1	0.308058	0.0284412	0.92789	0.0339807	0.419761	0.0644688
ZRT2	1.31358	0.117653	1.72745	0.0221791	1.44963	0.0506304			ZRT2	0.521334	0.0174592	1.06898	0.0224863	0.521494	0.0409067
orf19.1424	1.37012	0.0065923	1.23079	0.0459522	1.26401	0.0156894			orf19.1424	0.00794449	0.00159471	0.0650246	0.000988956	0.52355	0.00661072
orf19.1534	1.51762	0.281335	1.67897	0.177914	1.9939	0.0751757			orf19.1534	1.14563	0.0190149	1.64179	0.0252446	1.10482	0.0513738
orf19.1691	1.92539	0.23284	1.07631	0.579407	1.37141	0.388285			orf19.1691	0.0112739	0.00808772	0.597949	0.0109812	0.0112235	0.0170908
orf19.1862	1.29794	0.0065923	1.52961	0.00271981	1.55438	0.00278093			orf19.1862	0.705353	3.41312e-05	0.653213	1.85759e-05	1.23154	0.000608414
orf19.2125	1.18318	0.00912566	1.03167	0.441592	1.08333	0.0995698			orf19.2125	1.00733	0.000277369	1.10192	0.000222986	1.19263	0.00166856
orf19.3615	1.01801	0.531063	0.945639	0.197416	0.910091	0.162725			orf19.3615	0.794084	0.00013636	1.10457	0.000199847	0.323707	8.59315e-05
orf19.409	0.633759	0.0065923	0.733035	0.00461862	0.734846	0.00832929			orf19.409	1.90267	0.00115234	0.868034	0.000162082	1.24206	0.00185123
orf19.411	1.55451	0.0583942	1.83049	0.0261494	1.15044	0.29738			orf19.411	0.392343	0.000255974	1.57145	0.00105716	1.55332	0.0121663
orf19.4174	1.00902	0.578538	1.0499	0.560598	0.921618	0.177422			orf19.4174	0.00335181	0.00024909	0.625718	0.000290091	0.517588	0.00130297
orf19.449	0.914221	0.365838	0.968594	0.347107	0.915053	0.246894			orf19.449	0.916431	0.000182853	1.65087	0.000385269	1.2198	0.00149349
orf19.4706	1.34372	0.0108143	1.03347	0.548112	1.23146	0.0177178			orf19.4706	0.928871	0.000894192	0.860235	0.000614744	0.862368	0.0028789
orf19.5517	0.507193	0.138384	0.551057	0.133961	0.765415	0.250741			orf19.5517	0.011871	0.00601624	0.0113161	0.00265152	3.70304	0.154552
orf19.5626	1.15145	0.303158	1.266	0.181739	1.6869	0.0281185			orf19.5626	0.925713	0.00499053	1.33286	0.00642334	0.860274	0.0139901
orf19.5848	0.978667	0.616543	0.894789	0.181739	0.820568	0.113677			orf19.5848	1.03204	0.00166238	1.71011	0.00232301	2.4407	0.0960008
orf19.6578	0.92078	0.293568	1.17331	0.124125	0.839206	0.0654701			orf19.6578	1.86366	0.00464143	2.27015	0.00723597	1.71574	0.0207392
orf19.6660	1.88032	0.00935227	1.63538	0.00497845	1.79341	0.00437728			orf19.6660	0.540125	0.000694357	0.317192	0.000287839	1.743	0.0183718
orf19.670.2	0.990093	0.647315	1.11249	0.177914	0.983963	0.341658			orf19.670.2	1.26837	2.53041e-05	0.880866	1.02691e-05	1.1871	8.59315e-05
ARP3	1.15077	0.151145	1.04611	0.579407	1.06041	0.383964			ARP3	0.00503578	0.00293845	0.192409	0.00202729	1.36292	0.0316773
CLN3	1.18067	0.365068	1.09942	0.513585	1.36152	0.16155			CLN3	1.78427	0.000825297	0.801668	0.000154451	1.48298	0.00304513
CMK2	0.901908	0.175187	0.796945	0.0255009	0.850629	0.0602881			CMK2	0.00296548	0.00442073	0.0852348	0.0029411	0.49934	0.0142226
YRA1	1.09477	0.215106	1.03589	0.563421	1.12831	0.137764			YRA1	2.20266	0.0132825	0.67054	0.00134157	2.57537	0.156654
orf19.3456	1.47775	0.112941	1.12518	0.478107	1.80367	0.0488712			orf19.3456	0.0631993	0.0223943	0.0631993	0.0194843	0.0631993	0.0454798

## Sheet: hms1-lys14-ume6
Probe Name	In vivo		In vivo		In vivo
	hms1ΔΔ/WT		lys14ΔΔ/WT		ume6ΔΔ/WT
	FC	FDR	FC	FDR	FC	FDR
ACE2	1.99488	0.0238917	4.15176	0.0112185	0.283462	0.00239058
ACS1	2.82964	0.155806	1.21738	0.351261	1.84507	0.418359
ACS2	1.53066	0.0501785	0.518125	0.0932964	1.18632	0.151599
ADH5	0.916308	0.0082824	1.2588	0.342843	1.03949	0.0441351
AHR1	1.58355	0.0311824	2.75613	0.0661418	1.24376	0.113784
ALS1	2.20097	0.0802334	2.14543	0.213614	2.35882	0.418359
ALS2	0.456067	0.0199576	0.0227633	0.0472074	0.0227633	0.0235748
ALS3	1.04321	0.000420459	0.988682	0.0177556	0.864972	0.00256158
ALS4	1.86481	0.165129	1.25288	0.618988	1.11411	0.260692
ALS5	0.702381	0.0429645	0.751012	0.278728	0.98387	0.161334
ALS6	1	0.462234	1	0.825	1	0.631915
ALS7	0.626207	0.0439322	1.34282	0.642389	0.435749	0.0848271
ALS9	0.0530625	0.0105686	0.0224595	0.0363786	0.0301291	0.018761
AOX2	0.431568	0.000809679	0.421358	0.0062626	1.04051	0.0112645
ARG1	0.958593	0.00997381	0.616529	0.0793299	1.42976	0.206454
ARG81	0.639346	0.0238281	1.14261	0.363967	0.820209	0.0822922
BCR1	1.62653	0.0475764	2.38637	0.138202	1.40564	0.195553
BRG1	1.58073	0.0429645	2.06492	0.282734	1.44991	0.212833
CAP1	1.52471	0.00738532	1.59825	0.741683	1.19898	0.0343055
CAT1	2.46289	0.0863627	0.757576	0.0932964	0.987105	0.0531252
CDC10	1.42765	0.071822	0.491208	0.14209	0.00201316	0.0374359
CDR1	2.00243	0.01377	1.67923	0.571777	1.03402	0.0112645
CDR2	0.0571889	0.0556013	0.0571889	0.14209	0.0571889	0.095775
CHT2	0.51211	0.135426	0.499555	0.364957	0.00354292	0.165171
CHT3	0.532233	0.00207027	1.01208	0.0926837	2.71567	0.08165
CIT1	2.98506	0.10552	1.14668	0.145145	2.06045	0.59169
CPH1	1.41072	0.0353893	0.480696	0.0926837	0.537	0.0374359
CPH2	2.14237	0.0414654	3.2115	0.00680355	2.00165	0.528578
CRH11	0.394617	0.00463925	0.331925	0.0263114	0.827959	0.0282613
CSA1	0.923175	0.135426	0.693263	0.388584	1.19922	0.359055
CSH1	1.95282	0.173213	0.465256	0.221613	0.999286	0.226859
DAK2	1.17957	0.00619802	0.555101	0.0276124	1.01611	0.0499142
DDR48	1.4612	0.0978311	0.550713	0.208093	0.789669	0.151599
DFG5	1.50085	0.0704884	0.993858	0.319042	1.0622	0.161334
ECE1	0.626671	0.000809679	0.868207	0.0263114	0.974632	0.00825487
ECM331	1.31258	0.00438951	1.18151	0.152671	0.677231	0.00681486
EFG1	1.29729	0.0252698	1.57286	0.811898	0.668238	0.0355546
ELF1	3.32846	0.256434	3.54664	0.00616445	2.44971	0.361349
ENA2	1.35044	0.00463925	1.33432	0.317392	1.08138	0.018761
ENA21	1.58976	0.0311	0.915848	0.153015	1.79071	0.373374
FAV2	3.48809	0.402844	1.12069	0.282734	1.26652	0.120212
FBP1	2.85314	0.0863627	1.13941	0.137392	1.65564	0.147545
FDH1	1.49188	0.0311824	0.433539	0.0472074	2.05539	0.601277
FGR15	2.22446	0.171124	0.594387	0.152281	0.0191224	0.0277153
FKH2	0.123929	0.00527913	0.0105376	0.0211388	0.0105376	0.0107479
FRP1	1.65732	0.0886981	2.1097	0.350121	2.95489	0.212833
FRP2	1.66235	0.153222	1.0582	0.500285	1.59721	0.436569
FRP3	2.28901	0.0238917	1.24046	0.212766	1.99609	0.508401
FTR1	0.893588	0.00619802	0.697222	0.0571328	1.88942	0.413492
GAL1	0.9779	0.0139084	1.35252	0.518511	0.848398	0.0413779
GAL4	0.929354	0.000460476	0.595035	0.00239845	1.07667	0.00305892
GAP2	2.56551	0.207648	0.76723	0.208093	2.30107	0.508401
GCA2	0.332864	0.0393756	0.295423	0.132896	0.894183	0.161334
GCN4	1.28359	0.000420459	1.13106	0.0263114	2.04396	0.548443
GIS2	3.056	0.224475	1.62944	0.699883	2.11929	0.602494
GNP1	0.884096	0.00463925	1.08345	0.158014	1.20671	0.0445597
GPD2	4.71501	0.266601	2.15282	0.278728	2.76478	0.309192
HAC1	2.45075	0.0414654	1.31905	0.300614	1.65164	0.168327
HAP2	1.8914	0.0710566	2.06133	0.29837	2.28037	0.507113
HAP3	0.021813	0.0183709	0.021813	0.0578115	1.02435	0.165171
HAP43	2.83236	0.188618	1.69852	0.618988	2.53581	0.272317
HEM1	0.887298	0.00794422	0.988512	0.213614	1.24897	0.119853
HGT7	1.00002	0.0282865	1.13003	0.337387	1.30687	0.165171
HOG1	2.06033	0.0900279	0.788384	0.180886	0.839584	0.0822922
HSP104	3.5592	0.425808	5.71913	0.00419958	0.698485	0.0674099
HSP70	1.98806	0.0311542	2.25797	0.0932964	0.799368	0.0234625
HTA1	1.079	0.000419337	0.66228	0.00239845	1.39081	0.00652353
HTA2	1.67592	0.0035901	0.889383	0.0187002	1.51935	0.0343055
HWP1	0.524964	0.00119149	0.532038	0.0142921	0.581843	0.00572665
HYR1	0.26294	0.0586096	0.345144	0.208093	0.162214	0.10442
IFD6	0.263756	0.0183639	0.0935804	0.0571328	0.818902	0.0929552
IHD1	1.94548	0.0496586	1.58911	0.790638	1.39985	0.161334
INO4	1.36175	0.0327492	0.255983	0.0550416	0.804931	0.075968
IRE1	1.24199	0.0110325	1.31806	0.433464	0.620272	0.018761
IRO1	1.49449	0.00448726	1.51473	0.699883	0.266552	0.00256158
KIP4	1.13645	0.00974902	1.17576	0.269836	0.392097	0.0112645
KRE1	1.36401	0.0150814	0.831651	0.0872247	0.668193	0.018761
MAC1	0.503381	0.041812	0.206665	0.110691	0.641064	0.119853
MAE1	0.404173	0.00491393	0.390098	0.0317435	1.14198	0.063918
MBF1	2.20569	0.00619802	1.41702	0.286446	1.3841	0.00825487
MDM34	1.07896	0.00638443	1.50272	0.709866	1.00693	0.0310387
MET28	2.13819	0.00619802	1.15018	0.0671052	2.05123	0.595121
NDT80	2.40557	0.0475764	2.24249	0.0793299	1.48937	0.104607
NPR1	0.540574	0.00333207	0.836894	0.0804042	0.966066	0.0276476
NRG1	1.28852	0.0921839	1.92502	0.555823	1.27688	0.285769
PCK1	1.06862	0.00192576	0.723948	0.0199415	0.77158	0.00652353
PES1	0.263388	0.0863627	0.263388	0.208153	0.263388	0.147545
PFK2	1.26218	0.0233825	1.82468	0.446821	0.988959	0.0591491
PGA13	0.571999	0.0574625	0.311692	0.161055	0.494865	0.119853
PGA17	2.35546	0.232036	0.832313	0.363325	6.68488	0.0374359
PGA25	0.0212181	0.0516206	0.0212181	0.138202	4.86623	0.165171
PGA34	1.75552	0.00520216	2.21354	0.0493491	1.09748	0.0159446
PGA37	0.626821	0.0145362	0.6984	0.14209	0.38611	0.0263487
PGA48	0.670638	0.00503351	1.09253	0.19607	0.991566	0.035956
PGA53	0.543837	0.0414654	0.00353224	0.0804042	0.949788	0.165171
PGA7	0.985278	0.0733455	0.743067	0.286736	1.63031	0.418359
PHO89	0.972613	0.0207461	1.0966	0.286736	0.712883	0.042659
PHR1	1.50246	0.0429645	1.08715	0.305754	0.456004	0.0357275
PHR2	2.58306	0.0752566	1.20301	0.19607	1.61743	0.147829
PIL1	1.37233	0.0304429	0.507383	0.0671052	0.800927	0.0447523
PIR1	0.73175	0.0311824	0.764301	0.208093	0.95856	0.120212
PLB5	1.75478	0.0359131	2.34133	0.0980692	1.39432	0.124878
POL1	1.21068	0.0386377	0.511861	0.124694	0.269578	0.0347026
PRA1	0.392768	0.138076	0.158973	0.297167	0.282027	0.216336
RBR1	11.9258	0.0765244	1.58362	0.811898	0.292244	0.0248824
RBR2	3.1109	0.331616	0.303705	0.113338	2.25332	0.553474
RBT1	0.0277559	0.00974902	0.0277559	0.0339598	0.0277559	0.018761
RBT5	0.828403	0.0760852	0.731896	0.300614	1.75989	0.500315
RCT1	1.75113	0.0988503	0.871046	0.286736	1.09704	0.179508
RFG1	1.83739	0.0110325	1.11177	0.14209	1.06964	0.0282613
RFX2	1.25758	0.00794422	1.33599	0.474349	0.339417	0.00681486
RHR2	6.91692	0.0820707	2.43474	0.0932964	2.66926	0.348133
RIM101	1.00712	0.00407878	1.54491	0.797436	0.834315	0.0112779
RNR22	0.365988	0.000495236	0.484044	0.00616445	0.619348	0.00256158
ROB1	1.46869	0.000809679	1.10588	0.0571328	1.3653	0.0435193
RPN4	3.17117	0.208858	2.3081	0.0872247	1.37476	0.0553855
RTA3	0.110123	0.0863627	0.110123	0.208153	0.110123	0.147545
SAP1	0.014554	0.00451908	0.014554	0.0182472	0.014554	0.00825487
SAP10	0.0600415	0.0353893	0.0600415	0.0932964	0.0600415	0.0582174
SAP2	0.218654	0.0863627	0.218654	0.208153	0.218654	0.147545
SAP4	1.88036	0.0321973	0.448664	0.0244917	0.233126	0.00652353
SAP5	1.79306	0.0337003	1.47108	0.684849	0.504558	0.018761
SAP6	0.896305	0.0220961	0.671406	0.110691	0.18013	0.0206803
SAP9	1.04793	0.00219415	1.00331	0.0661418	0.829614	0.00825487
SCW11	0.387204	0.00586101	0.360642	0.0339598	1.93492	0.508401
SCW4	0.423432	0.0396962	0.0101731	0.0857306	7.0823	0.0374359
SEF1	2.30091	0.134716	1.8569	0.503142	1.26638	0.174453
SEF2	4.59186	0.291409	2.14082	0.197101	2.86665	0.165171
SGA1	2.92398	0.185746	1.96558	0.309059	0.4896	0.018761
SIN3	1.39081	0.00192576	0.877669	0.0317435	0.990488	0.0091233
SIT1	1.50716	0.0613393	1.44823	0.707583	1.57441	0.320261
SMC2	0.0171038	0.0434482	0.0171038	0.113338	0.0171038	0.0760823
SOD4	3.34685	0.298832	0.959525	0.0642153	1.73802	0.216611
SOD5	0.527763	0.000809679	0.82067	0.0263114	0.411799	0.00256158
SOD6	0.714302	0.0409604	1.33694	0.618988	1.44495	0.295272
SOG2	0.428824	0.00909126	0.445657	0.0729956	0.674126	0.0374359
SSB1	2.90322	0.175536	1.36996	0.446133	1.41573	0.116798
STF2	1.00531	0.0304429	1.34311	0.571777	1.45703	0.228119
STP2	1.41607	0.0304429	1.96405	0.317392	1.21485	0.116217
SUT1	1.83385	0.0110325	1.43019	0.467105	2.11481	0.604109
TEC1	1.04369	0.0496586	1.84297	0.561289	1.525	0.325031
TPK1	2.08794	0.153222	2.30436	0.29252	1.36085	0.287815
TPK2	0.945528	0.0046326	0.603651	0.0276124	0.671031	0.0112645
TPS2	0.975673	0.000420459	1.27717	0.0804042	0.726832	0.00174432
TRR1	1.69165	0.0240418	0.690434	0.0592168	1.30597	0.0845314
TRX1	3.22199	0.235577	1.17945	0.0793299	1.22056	0.0107479
TTR1	2.09301	0.0355755	0.75183	0.0571328	0.782368	0.018761
TUP1	1.22749	0.00463925	0.734499	0.0317435	0.903683	0.018761
TYE7	1.05583	0.0128031	1.46413	0.673421	0.832319	0.0347026
UCF1	0.82193	0.00303087	1.02393	0.0932964	1.30084	0.0413779
UGA32	1.36815	0.0652669	0.478398	0.158014	0.371273	0.0626114
UGP1	1.81952	0.00909126	1.26032	0.208093	1.32821	0.0347026
UME6	1.19542	0.00181656	1.01888	0.0872247	0.00198367	0.00174432
UPC2	0.711508	0.0311	1.0369	0.323821	0.875772	0.105538
WH11	1.24577	0.136153	0.291896	0.221567	0.631638	0.188444
YHB1	0.723984	0.0238281	1.21251	0.434779	0.877527	0.0848271
YWP1	0.0289945	0.0792483	0.143893	0.217156	0.309652	0.165171
ZAP1	0.536138	0.0820707	0.256411	0.208093	0.45909	0.161334
ZCF20	0.963473	0.0337003	0.826843	0.208093	0.916005	0.110363
ZCF3	4.30317	0.235577	1.91319	0.282734	2.45164	0.363193
ZCF31	0.376442	0.0150814	0.519797	0.0932964	0.0059193	0.018761
ZCF34	0.29538	0.0434482	0.0207765	0.0997317	0.0207765	0.063918
ZCF39	1.65181	0.00909126	1.27307	0.26927	0.778385	0.0112645
ZCF7	0.0870188	0.0675181	0.0870188	0.166952	0.0870188	0.115814
ZRT1	0.351563	0.13946	0.152542	0.300614	0.234198	0.216336
ZRT2	0.447862	0.0927276	0.200072	0.221567	0.582204	0.200466
orf19.1424	0.837474	0.0337003	0.383081	0.0932964	0.705232	0.0860672
orf19.1534	0.574669	0.0769624	0.67503	0.309059	0.619877	0.165171
orf19.1691	0.0112235	0.0547875	0.0112235	0.14209	0.0112235	0.0945699
orf19.1862	2.8649	0.198942	0.890298	0.0685478	1.41439	0.0414315
orf19.2125	1.25315	0.00794422	0.874778	0.0793299	1.75315	0.26111
orf19.3615	2.44562	0.0586083	1.56213	0.822136	1.01943	0.0176455
orf19.409	1.53404	0.0147205	1.92383	0.244155	1.15376	0.0493709
orf19.411	0.306793	0.00451908	0.930617	0.112638	0.865786	0.0295681
orf19.4174	0.259336	0.00503351	0.579367	0.0578115	0.389024	0.0172437
orf19.449	0.889196	0.0046326	1.38421	0.446133	0.784481	0.0128711
orf19.4706	2.08804	0.0598935	1.01923	0.208093	0.819086	0.0413779
orf19.5517	13.6095	0.0304429	2.2239	0.446133	2.19081	0.596164
orf19.5626	0.949663	0.0439052	1.31181	0.595916	0.978665	0.147545
orf19.5848	1.04578	0.0169242	2.03633	0.22842	1.08192	0.0755876
orf19.6578	1.29191	0.0275563	1.70668	0.618988	1.52765	0.216611
orf19.6660	1.75565	0.0414654	1.4528	0.672647	1.24361	0.143232
orf19.670.2	0.877357	0.000582491	0.957253	0.0233308	1.02273	0.00496072
ARP3	0.474955	0.0327492	0.166703	0.0872247	0.932038	0.151599
CLN3	2.49933	0.0516206	2.29689	0.0685478	1.15277	0.0413779
CMK2	0.704061	0.050975	0.189193	0.112638	0.417221	0.0929552
YRA1	0.785784	0.0238917	0.589691	0.110691	1.34896	0.199443
orf19.3456	0.0631993	0.114106	0.0631993	0.265934	0.0631993	0.17605

## Sheet: nrg1 interaction
Probe Name	In vitro		In vitro		In vitro			Probe Name	In vivo		In vivo		In vivo
	efg1ΔΔ nrg1ΔΔ/WT		rob1ΔΔ nrg1ΔΔ/WT		brg1ΔΔ nrg1ΔΔ/WT				efg1ΔΔ nrg1ΔΔ/WT		rob1ΔΔ nrg1ΔΔ/WT		brg1ΔΔ nrg1ΔΔ/WT
	FC	FDR	FC	FDR	FC	FDR			FC	FDR	FC	FDR	FC	FDR
ACE2	1.14301	0.477079	0.368643	0.00116765	0.54963	0.00244767		ACE2	13.1373	0.00239709	3.71824	0.0696923	1.12978	0.00151999
ACS1	0.287413	0.0151789	0.322686	0.000198936	0.272524	0.000221111		ACS1	1.1215	0.155102	1.0941	0.0845344	3.34915	0.346244
ACS2	3.11794	0.0479358	3.16885	0.00113199	4.27836	0.00013133		ACS2	0.457206	0.0461112	0.980055	0.112601	1.60498	0.0561934
ADH5	0.280504	0.0186934	1.56202	0.024949	0.91314	0.0564615		ADH5	0.289734	0.0129519	1.5161	0.148516	1.1375	0.0110083
AHR1	1.20873	0.384392	1.18512	0.211172	2.69139	0.00178316		AHR1	0.682883	0.0396834	1.76478	0.305447	2.06056	0.0623267
ALS1	0.180378	0.00919739	0.151306	0.000246058	0.286211	0.000679687		ALS1	0.54758	0.0377429	1.17137	0.112601	3.18602	0.258262
ALS2	1.65724	0.0281165	15.935	0.00551227	1.02113	0.179022		ALS2	0.0227633	0.0198346	6.31443	0.07178	0.0227633	0.0144927
ALS3	1.12088	0.492475	0.70579	0.010028	2.75448	0.00371483		ALS3	1.19077	0.0174759	0.843631	0.00182962	2.12727	0.0152041
ALS4	1.67733	0.0918361	9.95412	0.00434672	1.42097	0.0742662		ALS4	0.349893	0.124524	1.75206	0.507082	0.77546	0.0892551
ALS5	0.587429	0.0548914	1.00403	0.135664	1.34767	0.112824		ALS5	0.754912	0.147692	0.937581	0.172109	0.168331	0.0316992
ALS6	0.115517	0.185768	0.115517	0.0638884	0.115517	0.0662546		ALS6	1	0.614362	33.8957	0.0758039	1	0.526596
ALS7	1.10951	0.379519	1.28367	0.0513962	0.993323	0.0247306		ALS7	0.897321	0.20176	1.11361	0.223328	0.581983	0.0515555
ALS9	1.9504	0.203491	3.66921	0.00841692	6.57802	0.000580104		ALS9	0.0144014	0.0176403	3.21155	0.342611	1.59081	0.0634767
AOX2	0.0742947	0.000229115	0.000447573	1.09121e-05	0.000447573	8.80694e-06		AOX2	3.81238	0.0256056	0.320139	0.00182962	0.854133	0.00137095
ARG1	0.21382	0.000229115	0.116415	2.95561e-05	0.46949	0.00015113		ARG1	1.06895	0.20709	0.924868	0.0335861	1.0409	0.0135808
ARG81	1.17761	0.253353	0.989596	0.0529509	1.08945	0.147314		ARG81	0.224642	0.0306131	0.789536	0.0870356	0.458784	0.0193843
BCR1	1.03021	0.439639	1.05535	0.0138075	1.14383	0.228339		BCR1	1.43668	0.407684	1.51934	0.230951	1.42313	0.0432421
BRG1	0.580718	0.0345224	0.89836	0.032904	0.000372092	0.000250709		BRG1	0.698912	0.0643343	1.38494	0.186329	0.000267802	0.00978657
CAP1	0.772075	0.122653	1.42165	0.0213294	1.5179	0.00597945		CAP1	1.01248	0.0432953	2.08709	0.49786	1.8155	0.00978657
CAT1	0.295674	0.00600567	0.40717	0.000207558	0.302428	9.26257e-05		CAT1	0.707986	0.0412296	0.486744	0.0225326	1.94562	0.0526346
CDC10	4.14639	0.0470329	14.9707	4.08005e-05	22.4631	5.09899e-07		CDC10	0.00201316	0.0349053	1.2844	0.245084	1.96389	0.118366
CDR1	0.56409	0.00258468	0.392284	0.000185262	0.669395	0.00312782		CDR1	1.64701	0.570726	1.03477	0.0133016	1.86031	0.00861803
CDR2	0.289056	0.175656	0.0986958	0.0400189	0.0564465	0.0369638		CDR2	0.0571889	0.0870229	0.47392	0.166709	1	0.0643649
CHT2	1.89034	0.044599	1.56725	0.000655761	4.55539	0.00160146		CHT2	1.95274	0.515377	2.78055	0.60005	3.78434	0.508072
CHT3	1.0328	0.519558	0.0108953	0.000628136	0.183432	0.00113468		CHT3	0.490368	0.00826644	0.00336807	0.00182962	0.00336807	0.00100997
CIT1	0.641232	0.00161829	0.0573277	1.09121e-05	0.133547	1.55436e-05		CIT1	0.957916	0.0283211	0.719869	0.00599077	3.33518	0.306022
CPH1	1.6928	0.160199	1.97414	0.00509805	2.11462	0.000291752		CPH1	0.31045	0.0312271	1.44865	0.223328	2.72436	0.17812
CPH2	1.18727	0.14039	0.876912	0.0017385	0.764249	0.000625573		CPH2	4.15123	0.00849302	2.75002	0.335705	1.62024	0.014865
CRH11	0.987923	0.205887	0.0944145	0.000108119	0.208521	0.000181243		CRH11	0.44788	0.0174759	0.308245	0.0114533	0.302474	0.0046063
CSA1	1.82985	0.0666214	1.07974	0.106881	1.15001	0.256777		CSA1	0.523594	0.219672	0.782882	0.288562	1.53637	0.201931
CSH1	2.76073	0.0151789	5.70268	0.000326265	4.13302	0.000481899		CSH1	0.727629	0.204234	1.61636	0.465112	1.52977	0.137989
DAK2	1.152	0.436363	6.67768	0.000492862	2.93138	0.000530811		DAK2	0.875295	0.0380049	3.13813	0.127611	1.5763	0.0110083
DDR48	0.646021	0.310859	1.36281	0.0458805	1.37732	0.102065		DDR48	0.633502	0.144834	1.08955	0.230951	1.05305	0.0810953
DFG5	1.70413	0.0106324	0.917967	0.0466018	0.895906	0.0475621		DFG5	0.724208	0.137558	1.26687	0.223328	1.37463	0.0667366
ECE1	0.495504	0.00183498	0.0134856	1.09121e-05	0.697079	0.000250709		ECE1	0.92499	0.0150709	0.0132117	0.00108789	0.327445	0.00100459
ECM331	0.31416	0.0087032	1.03607	0.141248	0.86964	0.0703673		ECM331	0.195901	0.00365176	0.982973	0.0203568	1.35812	0.00452035
EFG1	0.000497275	0.00258468	1.59598	0.0439964	0.816637	0.0156896		EFG1	0.00081426	0.0129519	4.4893	0.0159283	2.51361	0.0993248
ELF1	0.548237	0.0354978	0.591193	0.000954901	1.04754	0.162386		ELF1	2.32942	0.100135	2.15042	0.601242	2.69831	0.0526346
ENA2	0.757207	0.0595202	0.100633	3.48155e-05	0.165554	4.01612e-05		ENA2	0.979803	0.0311392	0.922853	0.0116004	0.841834	0.00252296
ENA21	0.979577	0.0087032	0.233264	1.09121e-05	0.419778	0.000799785		ENA21	2.16982	0.177075	1.34945	0.127611	2.02644	0.0543748
FAV2	0.35842	0.00531709	0.467057	0.000457916	1.0898	0.179022		FAV2	0.766912	0.0862394	1.76438	0.379798	2.24521	0.0634767
FBP1	0.595954	0.0260983	0.664859	0.00725385	0.433512	0.00160146		FBP1	1.7644	0.483568	1.49697	0.105636	3.36035	0.255052
FDH1	0.489112	0.149395	0.159291	2.60275e-05	0.0765625	2.60275e-05		FDH1	1.50464	0.417724	1.00924	0.0610992	1.29952	0.0224459
FGR15	1.1433	0.415232	1.44069	0.0359539	1.18525	0.193326		FGR15	0.0191224	0.0236162	1.31064	0.2718	0.835434	0.0365288
FKH2	1.674	0.0265995	1.9452	0.00093456	1.53215	0.000885745		FKH2	0.244864	0.0174759	0.80348	0.0707624	0.456893	0.0083318
FRP1	0.576026	0.0350631	0.365445	0.00123604	0.254079	0.000740516		FRP1	2.16675	0.31561	1.64717	0.384204	2.02898	0.125165
FRP2	0.569145	0.00600567	0.181818	1.09121e-05	0.367239	2.42358e-05		FRP2	1.25974	0.42129	1.21338	0.328507	2.85131	0.326018
FRP3	0.415894	0.0334889	0.212354	9.46408e-05	0.236979	0.000165869		FRP3	1.56004	0.421356	0.839699	0.0159283	2.31624	0.0407743
FTR1	3.18875	0.00600567	2.95079	0.000207558	2.40494	0.000400541		FTR1	1.82392	0.426747	2.02172	0.453405	2.44293	0.0611876
GAL1	1.7822	0.00258468	1.4768	0.0280162	1.52412	0.0742662		GAL1	0.838482	0.0623209	0.474595	0.0242728	0.97593	0.013946
GAL4	1.76924	0.00925425	2.362	2.60275e-05	3.1092	0.000257239		GAL4	0.851106	0.00539017	1.11085	0.00289393	0.810216	0.00026137
GAP2	1.02965	0.465202	0.0950478	4.08005e-05	0.000498637	2.56277e-05		GAP2	0.698837	0.0990438	5.84405	0.0203568	2.6115	0.195756
GCA2	0.741072	0.313755	3.47716	0.00217862	1.57713	0.143306		GCA2	0.732622	0.158013	2.51434	0.615741	0.788724	0.0622957
GCN4	1.97689	0.0899631	1.37623	0.0923112	2.10852	0.0025544		GCN4	1.46057	0.140543	1.48585	0.0259126	1.76334	0.00100997
GIS2	1.17924	0.00949377	1.81526	0.000626454	1.43107	0.0487588		GIS2	0.993013	0.0588725	2.15376	0.615741	2.73368	0.0931955
GNP1	0.981424	0.492516	0.484631	0.00106418	0.375278	0.000626172		GNP1	1.22617	0.141421	0.84717	0.0216742	0.607234	0.00416833
GPD2	0.333017	0.00919739	0.140069	0.000252656	0.284351	0.000502604		GPD2	2.36069	0.233347	0.85043	0.0958444	2.45441	0.12857
HAC1	1.25283	0.0313062	0.899833	0.0001342	1.14253	0.207445		HAC1	3.20525	0.119141	1.52068	0.105636	2.68898	0.0508174
HAP2	0.904533	0.155416	0.376987	6.71044e-05	0.377389	9.26257e-05		HAP2	1.48744	0.437297	2.62548	0.490407	3.59289	0.403277
HAP3	1.48093	0.0714207	1.00436	0.136195	0.569036	0.00927215		HAP3	1.18975	0.407684	1.50551	0.342611	1.01536	0.0475635
HAP43	1.45999	0.17735	0.915645	0.00462788	0.996545	0.0209246		HAP43	3.28186	0.0425119	2.5023	0.561659	3.74739	0.444732
HEM1	1.01781	0.475512	1.88281	0.0134951	2.2299	0.00261317		HEM1	1.84478	0.457434	1.9741	0.49786	2.75509	0.136772
HGT7	5.24476	0.000229115	19.2991	0.00122747	15.7229	0.000209527		HGT7	0.0775106	0.0189681	0.550127	0.0534492	0.735447	0.0214954
HOG1	1.58958	0.011453	1.54222	0.000355229	1.57054	0.00438437		HOG1	0.438557	0.0537383	1.38315	0.223328	2.03333	0.0892918
HSP104	1.18008	0.371245	2.04772	0.0194547	1.57374	0.0104474		HSP104	9.23632	0.0146794	6.91351	0.0500585	1.60687	0.0623267
HSP70	0.57553	0.115747	1.87187	0.0466291	1.64639	0.0156896		HSP70	4.10776	0.0311392	6.04108	0.0116004	1.53536	0.0147785
HTA1	2.09216	0.0265995	1.69454	0.00589805	1.42013	0.0156896		HTA1	0.817033	0.00539017	0.771651	0.00050483	1.01477	0.000245657
HTA2	2.06187	0.0179326	1.65493	0.0124094	1.50704	0.00703719		HTA2	0.910482	0.0160141	0.855938	0.00289393	1.38772	0.00100997
HWP1	1.97041	0.122653	0.0944287	0.000299872	0.843315	0.0113957		HWP1	1.14562	0.0589824	0.222534	0.00182962	0.308498	0.00100997
HYR1	0.374799	0.00427747	0.000657735	2.95561e-05	0.549559	0.00339715		HYR1	0.608513	0.177075	0.0390801	0.112601	0.143551	0.0634767
IFD6	0.942783	0.290524	1.42742	0.0430016	0.579459	0.0048705		IFD6	1.01707	0.191282	0.762048	0.0948348	0.00789346	0.0152041
IHD1	0.858153	0.213908	1.34077	0.0101263	1.28304	0.0687892		IHD1	1.05319	0.130817	3.37575	0.165935	2.64775	0.125165
INO4	1.33793	0.00856827	0.623816	0.000711934	0.531655	0.00105911		INO4	0.389755	0.0367654	0.831113	0.0845344	0.579985	0.0155206
IRE1	2.00121	0.0125648	2.80024	0.00100037	2.38615	0.00104988		IRE1	0.52597	0.0189681	2.62801	0.424174	1.23006	0.0110083
IRO1	1.99747	0.0281165	4.06284	0.00113839	1.96239	0.00128335		IRO1	1.73818	0.483568	3.69944	0.0352246	1.83194	0.00692431
KIP4	1.44317	0.155416	1.11044	0.135145	3.10117	2.60275e-05		KIP4	0.457799	0.0173033	1.69746	0.223328	1.77936	0.0224459
KRE1	1.61215	0.278337	0.693084	0.0011127	1.45621	0.0535154		KRE1	1.38393	0.281994	2.33747	0.703193	2.01708	0.0359357
MAC1	1.45366	0.290524	0.681343	0.0166689	3.3883	0.00248666		MAC1	0.354587	0.0862394	1.04149	0.210407	0.593764	0.0526346
MAE1	7.3391	0.0318695	5.34759	2.60275e-05	5.64996	1.55436e-05		MAE1	1.63518	0.559783	0.792002	0.0309784	0.609774	0.00639605
MBF1	1.45816	0.00126725	2.98809	5.51857e-05	3.27593	1.42579e-05		MBF1	0.856401	0.00826644	2.62085	0.2718	2.93572	0.0193438
MDM34	0.295515	0.00600567	0.223087	6.9949e-05	0.240326	7.59088e-05		MDM34	1.29788	0.189506	0.917537	0.0242728	0.700932	0.00457567
MET28	1.54662	0.0741077	2.18534	0.000826529	2.70953	0.000250709		MET28	1.21969	0.0352652	4.34621	0.042734	3.26718	0.0611876
NDT80	0.990463	0.508165	0.442764	0.000215524	0.90293	0.0382936		NDT80	1.24628	0.119748	1.01555	0.0260009	1.31617	0.00639605
NPR1	2.05711	0.0125648	1.69137	0.000976999	1.71594	0.00894299		NPR1	0.621899	0.0174759	1.29942	0.0958444	1.58717	0.0083318
NRG1	0.000757978	0.000511365	0.000757978	5.92807e-05	0.000757978	7.9801e-05		NRG1	0.000678777	0.0603438	0.000678777	0.084991	0.000678777	0.0475635
PCK1	0.354132	0.000229115	0.467947	4.08005e-05	0.257865	1.55436e-05		PCK1	0.95794	0.0232871	0.835379	0.00729526	1.06479	0.00177232
PES1	0.256873	0.00480621	0.472032	0.00283709	0.736923	0.077936		PES1	0.263388	0.137558	0.263388	0.179254	0.263388	0.0993248
PFK2	3.89652	0.00553694	8.60566	0.000447781	6.44448	0.000250709		PFK2	1.24083	0.237361	2.61284	0.465112	1.50641	0.029279
PGA13	2.77524	0.0361945	9.32587	5.51857e-05	5.29643	4.01612e-05		PGA13	0.933297	0.244278	4.79787	0.0758039	2.45421	0.231666
PGA17	1.14716	0.558164	0.00307884	2.95561e-05	0.00307884	3.15748e-05		PGA17	6.67726	0.0135285	0.225816	0.117311	0.0173438	0.0537298
PGA25	1.17295	0.552857	0.00515758	2.60275e-05	0.00515758	2.60275e-05		PGA25	2.70412	0.244278	0.0212181	0.112601	0.0212181	0.0623267
PGA34	1.70867	0.261986	0.00100297	2.60275e-05	0.0917361	2.60275e-05		PGA34	0.603746	0.00709858	0.0427769	0.00149126	0.272593	0.00100997
PGA37	0.245856	0.00126725	0.00278861	5.51857e-05	0.00278861	7.59088e-05		PGA37	0.00682953	0.0146794	4.44439	0.0610992	0.00682953	0.00792098
PGA48	0.88755	0.249087	0.467012	0.0011127	0.371844	0.00075854		PGA48	0.57207	0.0176403	0.413817	0.0114533	0.406317	0.00452035
PGA53	7.59805	0.00480621	1.79131	0.0102214	1.10362	0.200717		PGA53	9.77245	0.00981956	0.733882	0.138081	0.465251	0.0457645
PGA7	1.006	0.313755	0.390408	0.000299872	0.445185	0.000290695		PGA7	0.976225	0.249418	0.782559	0.180491	1.2245	0.0947841
PHO89	1.0293	0.492475	0.169715	0.00196815	0.964474	0.147314		PHO89	1.80205	0.483568	0.65367	0.0500585	2.29781	0.0865059
PHR1	1.54994	0.276709	0.871543	0.0574092	1.5204	0.0354869		PHR1	0.841801	0.0959357	0.670244	0.066361	1.18069	0.033734
PHR2	0.0812065	0.00238552	0.234273	0.000876214	1.8786	0.00113468		PHR2	0.374707	0.00826644	2.50545	0.412085	3.71721	0.402352
PIL1	0.792616	0.200824	1.05107	0.000578389	0.682465	0.00019741		PIL1	0.654415	0.0456096	1.29067	0.133158	0.949298	0.0166867
PIR1	0.860806	0.439639	0.645305	0.00093456	0.320754	0.000179124		PIR1	1.31762	0.356241	0.634631	0.084991	1.90427	0.0931955
PLB5	0.893849	0.18347	0.957334	0.0129297	1.4368	0.00597945		PLB5	0.395596	0.0174759	1.01175	0.0524728	2.87313	0.170988
POL1	1.82107	0.121817	3.27969	0.000332598	2.9766	0.000124104		POL1	0.0108817	0.0198346	1.24419	0.222923	0.785177	0.028884
PRA1	23.134	0.236312	0.178865	0.00209673	6.43426	0.0172434		PRA1	0.212043	0.20709	0.280076	0.26471	0.385888	0.153821
RBR1	0.0207391	0.00183498	0.0207391	0.000265264	0.0207391	0.000250709		RBR1	0.621756	0.0705473	0.790997	0.0758039	2.37617	0.102307
RBR2	1.10701	0.565061	0.0945857	2.60275e-05	0.0195792	1.42579e-05		RBR2	2.27131	0.314364	0.491454	0.0969569	1.56573	0.0993248
RBT1	1.95247	0.176976	2.10424	0.012508	2.18778	0.0288794		RBT1	0.0277559	0.0174759	0.0277559	0.0225326	0.0277559	0.0107615
RBT5	2.59151	0.060411	0.664963	2.95561e-05	0.769629	0.000250709		RBT5	1.00832	0.281994	1.15671	0.286349	1.05609	0.0977084
RCT1	0.568754	0.0281165	0.828491	0.0410842	0.752945	0.0126701		RCT1	0.458042	0.084153	2.11832	0.6407	1.45676	0.0837809
RFG1	1.61428	0.205887	3.20455	0.000626454	5.26277	2.71563e-05		RFG1	1.09103	0.0765505	4.1103	0.0431253	1.86883	0.0103714
RFX2	0.865684	0.206938	1.44782	0.0428895	2.28824	0.000246881		RFX2	0.268197	0.00826644	2.41797	0.584816	2.27644	0.0372104
RHR2	0.0545825	0.000229115	0.356831	0.000309958	0.390375	0.00105911		RHR2	0.907554	0.0870581	1.20188	0.102915	3.43301	0.315596
RIM101	0.920127	0.266566	0.300232	0.000626454	0.291237	0.000368137		RIM101	0.848732	0.0198346	0.59549	0.00729526	0.627776	0.00242366
RNR22	0.825328	0.115472	13.7098	0.000695512	5.58288	0.00246946		RNR22	0.173277	0.00178336	1.88679	0.223328	0.726474	0.00100997
ROB1	1.01753	0.475512	0.000618277	2.95561e-05	1.66953	0.000873374		ROB1	0.382535	0.000712027	0.00237237	7.42616e-05	1.39128	0.00240391
RPN4	0.601926	0.00440952	1.08521	0.0939899	1.45881	0.00135228		RPN4	4.45138	0.00239709	5.943	0.0159283	7.26966	0.00252296
RTA3	1.58122	0.379519	0.186939	0.0716044	0.186939	0.0728985		RTA3	0.110123	0.137647	0.110123	0.179271	0.686518	0.0993248
SAP1	0.543198	0.339409	1.03629	0.225351	0.474146	0.0943631		SAP1	0.968381	0.174587	0.014554	0.00893637	0.014554	0.00457567
SAP10	0.475458	0.0595202	0.422994	0.00243384	0.0121025	0.000250709		SAP10	0.0600415	0.0552364	1.67137	0.474729	0.0978251	0.0422546
SAP2	0.127752	0.154898	0.127752	0.0497205	0.127752	0.0509792		SAP2	0.218654	0.137558	0.218654	0.179254	0.776198	0.0993248
SAP4	0.0117903	0.0117059	0.0117903	0.00244017	0.0117903	0.00248666		SAP4	0.510108	0.0173033	0.0860455	0.00434785	0.251644	0.00252296
SAP5	1.89478	0.0317529	0.000368479	0.000352656	0.360425	0.00143764		SAP5	2.14246	0.166344	0.0313931	0.00893637	0.72528	0.00873773
SAP6	0.00165834	0.000511365	0.00165834	5.51857e-05	0.00165834	7.59088e-05		SAP6	0.152419	0.0189681	0.000380281	0.0203568	0.13909	0.0106788
SAP9	0.347652	0.0087032	0.319094	1.09121e-05	0.192752	1.19819e-05		SAP9	0.795857	0.0189681	0.747919	0.00599077	1.20237	0.00252296
SCW11	1.76969	0.0317663	0.219448	0.00116765	0.123956	0.00107399		SCW11	0.297253	0.0174759	0.0504382	0.00893637	0.00499269	0.00457567
SCW4	1.11202	0.565061	0.00291371	8.60887e-05	0.00291371	0.000118743		SCW4	5.73647	0.00826644	0.0101731	0.0683644	0.0101731	0.0349964
SEF1	1.13319	0.535289	0.540896	0.000745478	0.89319	0.009761		SEF1	2.21215	0.275473	0.831868	0.105636	3.01266	0.250316
SEF2	0.612412	0.00271335	1.67376	0.00859031	0.557044	0.000864765		SEF2	2.64327	0.224088	3.61642	0.148259	3.59866	0.390386
SGA1	0.513851	0.171067	0.435533	0.000395884	0.286354	0.000191492		SGA1	1.38744	0.417622	3.80206	0.110258	5.88391	0.0508174
SIN3	1.2464	0.159972	1.9378	0.00265876	1.48911	0.00237023		SIN3	0.95064	0.0190944	1.64505	0.160791	2.13824	0.00673659
SIT1	0.188287	0.000511365	0.0956659	5.51857e-05	0.301853	0.000250709		SIT1	0.969988	0.185023	0.887252	0.11914	1.67103	0.0785666
SMC2	2.02416	0.0311616	1.7906	0.0194547	1.72218	0.00340911		SMC2	0.0171038	0.0678683	0.527111	0.160791	0.0171038	0.0527361
SOD4	2.85937	0.0122309	1.13148	0.243591	4.83623	0.0369638		SOD4	1.00828	0.109061	2.30904	0.717719	5.86847	0.118366
SOD5	0.463965	0.0100412	0.715527	0.00845373	1.17093	0.215283		SOD5	0.251816	0.00239709	0.407008	0.00182962	0.566194	0.00100997
SOD6	0.00143377	0.00258468	0.535058	0.00439492	0.0960008	0.000679687		SOD6	0.230671	0.0552364	0.696944	0.117344	0.796692	0.0508174
SOG2	1.3794	0.236825	0.873766	0.0103085	1.24096	0.072311		SOG2	0.459533	0.0349053	1.13813	0.122336	0.622434	0.0130257
SSB1	2.46811	0.058476	3.60166	6.975e-05	3.93091	0.00113468		SSB1	0.935336	0.0594787	1.40929	0.084991	3.58472	0.360278
STF2	0.526688	0.180409	0.950706	0.0467385	0.415555	0.000999872		STF2	0.561884	0.0564939	1.47992	0.230951	1.216	0.0386883
STP2	0.88945	0.208433	0.916685	0.000681691	0.576511	0.000144953		STP2	1.42606	0.36757	1.3111	0.137598	0.934896	0.0165093
SUT1	2.31663	0.193263	1.2653	0.126896	2.23698	0.00192974		SUT1	2.58097	0.0349053	1.8836	0.335705	2.81655	0.0627545
TEC1	0.214941	0.000229115	0.277692	3.29141e-05	0.310161	4.01612e-05		TEC1	1.08007	0.237361	0.266767	0.0696923	0.889682	0.0515555
TPK1	0.43412	0.00696153	0.307632	0.000745478	0.503841	0.00184539		TPK1	4.37012	0.0196344	1.29158	0.27904	1.41672	0.0942825
TPK2	1.87848	0.0281165	2.36728	0.00216178	1.53403	0.0245289		TPK2	0.48027	0.0155847	1.12059	0.0587832	1.2364	0.00576667
TPS2	0.536309	0.109364	1.76846	0.0109532	0.777001	0.00333464		TPS2	0.690698	0.00257761	2.12807	0.322074	1.14146	0.000522654
TRR1	2.80559	0.179118	1.31212	0.0939899	1.53817	0.0294458		TRR1	0.747828	0.0369651	0.744015	0.0252233	1.27718	0.0126156
TRX1	1.75912	0.0772728	3.55781	0.0011127	3.79822	0.000146812		TRX1	1.14596	0.047308	3.22617	0.0500585	4.02259	0.4803
TTR1	1.19024	0.213908	2.22163	2.95561e-05	2.9582	4.01612e-05		TTR1	0.360499	0.00977055	2.53998	0.490407	2.91544	0.118366
TUP1	3.86834	0.0714207	2.31724	0.000853584	1.65269	0.00133425		TUP1	0.900341	0.0219293	1.39669	0.0683644	1.06791	0.00429381
TYE7	0.589641	0.104693	1.29683	0.0497279	3.52091	0.00432558		TYE7	0.417695	0.0174759	1.6545	0.222259	1.24775	0.0152869
UCF1	1.04193	0.564256	2.29968	0.000994992		0.160897		UCF1	1.10226	0.0561278	1.55179	0.084991	1.23263	0.00478803
UGA32	1.0718	0.564256	1.4599	0.0551774	1.97927	0.00414955		UGA32	0.0118522	0.0349053	1.09852	0.211935	1.52841	0.0810953
UGP1	1.86576	0.0265995	3.2106	0.00130966	2.01145	0.000635175		UGP1	0.710386	0.00868796	1.82018	0.229416	1.53114	0.00448032
UME6	1.12734	0.537145	0.758923	0.00409077	6.04136	0.000181243		UME6	0.402108	0.00843074	0.958192	0.00729526	1.96984	0.00550763
UPC2	1.70765	0.105536	3.16876	5.98375e-05	2.85502	0.000936807		UPC2	0.462735	0.0624012	0.977866	0.137598	0.430909	0.0254551
WH11	0.138081	0.00602335	0.0696311	2.60275e-05	0.0377371	1.97621e-05		WH11	0.236863	0.137558	0.376409	0.183909	0.598976	0.0993248
YHB1	0.163635	0.00465692	0.180514	2.60275e-05	0.0846826	1.55436e-05		YHB1	1.32543	0.321239	0.293485	0.0413968	0.332231	0.0160642
YWP1	0.00572353	0.000229115	305.305	4.30697e-05	3.40071	0.0111229		YWP1	0.000848025	0.124524	10.305	0.00547289	0.407983	0.107101
ZAP1	3.79891	0.0285686	0.931691	0.112702	10.5817	0.000295537		ZAP1	0.315295	0.141421	0.747423	0.232182	0.357778	0.0865059
ZCF20	1.44203	0.159972	0.43041	0.000745478	0.586806	0.00703719		ZCF20	0.587892	0.0765505	0.556747	0.0707624	0.536906	0.0239152
ZCF3	0.592405	0.0208883	0.588904	0.00283709	0.636942	0.00237023		ZCF3	1.89293	0.432068	1.99879	0.490407	3.40174	0.260161
ZCF31	3.99277	0.00350365	2.17213	0.00154427	1.5452	0.0322703		ZCF31	0.325948	0.0369651	1.30837	0.179254	0.723564	0.0239089
ZCF34	2.96622	0.0829551	2.96584	0.000373556	3.53575	0.000123508		ZCF34	0.0532755	0.0603438	1.10147	0.264729	0.0207765	0.0470808
ZCF39	0.709326	0.102424	1.12657	0.211172	1.2041	0.147314		ZCF39	0.747011	0.0236162	1.45199	0.0696923	1.54996	0.00660424
ZCF7	1.26362	0.370722	0.853347	0.0912627	0.991525	0.168252		ZCF7	0.0870188	0.105622	0.0870188	0.138569	2.5352	0.0892918
ZRT1	5.9976	0.202589	0.0135149	4.08005e-05	2.92145	0.0644742		ZRT1	0.169315	0.20709	0.293387	0.2718	0.339496	0.155262
ZRT2	8.85127	0.0824664	0.916959	0.0382795	4.80378	0.00868165		ZRT2	0.323165	0.166558	0.39326	0.212377	0.356862	0.0996005
orf19.1424	1.79373	0.0269728	1.02662	0.0787706	1.19213	0.193326		orf19.1424	0.813949	0.144167	2.03963	0.60005	1.52597	0.0634767
orf19.1534	3.65628	0.0139429	1.84913	0.0356752	3.48312	0.00166597		orf19.1534	0.423936	0.147692	0.887973	0.248267	0.464062	0.0837809
orf19.1691	1.17808	0.53009	184.746	0.000976999	123.87	0.00037131		orf19.1691	0.0112235	0.0862394	74.0701	0.00236227	0.0112235	0.0634767
orf19.1862	0.230969	0.0115491	0.862341	0.0217757	0.719092	0.00326765		orf19.1862	0.69787	0.00977055	3.41935	0.0507271	4.12063	0.422839
orf19.2125	1.12964	0.262242	2.35795	2.60275e-05	2.72114	0.000119449		orf19.2125	0.906949	0.0589824	2.05791	0.490407	2.13043	0.0286729
orf19.3615	0.496251	0.0460891	0.756582	0.00133601	0.870472	0.0040334		orf19.3615	1.00276	0.185023	2.13057	0.60005	3.06207	0.107833
orf19.409	0.418899	0.00465692	0.445516	2.60275e-05	0.678216	0.000181243		orf19.409	1.33952	0.224174	1.15013	0.0460434	1.28684	0.0083318
orf19.411	1.03946	0.501665	0.91099	0.0923112	0.559745	0.00894299		orf19.411	0.378106	0.0166739	1.32251	0.0958444	0.572062	0.00550763
orf19.4174	0.966066	0.406518	0.585078	0.0011127	0.345936	0.00013689		orf19.4174	0.00335209	0.00849302	0.663631	0.0268724	0.714875	0.0083318
orf19.449	0.84818	0.439639	0.491053	0.00265876	0.236991	0.000386586		orf19.449	1.76029	0.483568	2.0522	0.49786	1.18005	0.00550763
orf19.4706	0.369507	0.0317663	0.693305	0.000172324	0.75838	0.00105911		orf19.4706	0.644951	0.0652969	2.30643	0.723866	2.33412	0.0830291
orf19.5517	2.42548	0.185858	1.28967	0.170178	3.24519	0.00215481		orf19.5517	1.03513	0.291978	1.27307	0.296548	7.12616	0.0810953
orf19.5626	0.519815	0.154792	1.57285	0.044216	0.441674	0.00202431		orf19.5626	0.718661	0.130817	2.51652	0.60005	1.82644	0.0993248
orf19.5848	0.533387	0.0254229	0.372995	0.000745478	0.105912	0.000254898		orf19.5848	0.61876	0.0356303	1.00656	0.0683644	0.274766	0.00576667
orf19.6578	0.345599	0.00124777	0.571098	0.0011127	0.211301	0.0001247		orf19.6578	0.846442	0.0765505	2.89571	0.288562	1.1081	0.0214061
orf19.6660	0.406337	0.000811369	2.78098	0.000358357	1.54735	0.00248666		orf19.6660	0.739394	0.0765505	2.39834	0.6407	1.76484	0.0368745
orf19.670.2	0.184264	0.000533727	0.273987	0.000223688	0.170558	0.000128921		orf19.670.2	2.01091	0.155102	1.97522	0.223328	2.30832	0.00464323
ARP3	1.82598	0.00894772	1.30262	0.10084	1.01594	0.0449664		ARP3	0.353556	0.0662303	0.975042	0.172388	1.07058	0.0596084
CLN3	0.68263	0.0909172	2.57535	0.00301839	3.04943	0.000799785		CLN3	1.40037	0.335974	3.98502	0.0242728	3.54213	0.302827
CMK2	1.03405	0.492475	1.56675	0.000954901	1.41828	0.027921		CMK2	0.347012	0.0870581	0.940716	0.205946	1.30844	0.0892918
YRA1	2.01788	0.0254229	0.79005	0.00194497	0.904249	0.0176029		YRA1	1.5788	0.519257	1.09076	0.135924	0.804807	0.0252705
orf19.3456	0.893872	0.262923	0.660672	0.0335296	0.215582	0.0023651		orf19.3456	0.0631993	0.17364	0.0631993	0.223328	0.391122	0.12837
