# Supplementary material for: Intravital imaging-based genetic screen reveals the transcriptional network governing Candida albicans filamentation during mammalian infection
Source: eLife. 2023 Feb 27;12:e85114. doi: 10.7554/eLife.85114 (PMC9995110; doi:10.7554/eLife.85114)
Supplement: Supplementary file 9. [file elife-85114-supp9.xlsx]

## Sheet: PCR Primer
Primer Number	Primer Name	Sequence	Description
SNR52_F	SNR52_F	AAGAAAGAAAGAAAACCAGGAGTGAA	Forward primer for amplification of SNR52 promoter
sgRNA_R	sgRNA_R	ACAAATATTTAAACTCGGGACCTGG	Reverse primer for amplification of sgRNA scaffold
SNR52/N	SNR52_F_N	GCGGCCGCAAGTGATTAGACT	Forward primer for 3rd round of PCR for construction of sgRNA expression cassette
sgRNA/N	sgRNA_R_N	GCAGCTCAGTGATTAAGAGTAAAGATGG	Reverse primer for 3rd round of PCR for construction of sgRNA expression cassette
CAS9_F	CaCas9_F	ATCTCATTAGATTTGGAACTTGTGGGTT	Forward primer for Cas9 amplification
CAS9_R	CaCas9_R	TTCGAGCGTCCCAAAACCTTCT	Reverse primer for Cas9 amplification
BRG1.P1	BRG1_KO_F	caacgttatttctccatccatacttgttacattataaatattcactactattccagaaattcaaattACCAGTGTGATGGATATCTGC	Forward primer to KO BRG1
BRG1.P2	BRG1_KO_R	ctattttaatgacgaattaaaggaatttgggttgggtaagcaacaggaataccgccagAGCTCGGATCCACTAGTAACG	Reverse primer to KO BRG1
BRG1.P3	sgRNA_F_BRG1	agtatacttaagaatactagGTTTTAGAGCTAGAAATAGCAAGTTAAA	Forward primer for amplification of sgRNA scaffold with overlapping BRG1 guide sequence
BRG1.P4	SNR52_R/BRG1	ctagtattcttaagtatactCAAATTAAAAATAGTTTACGCAAGTC	Reverse primer for amplification of sgRNA scaffold with overlapping BRG1 guide sequence
BRG1.P5	BRG1_PUP195	TATCAGGTCATAGATCCCTG	Forward check in primer
BRG1.P6	BRG1_R-488	GGTGATGTAGAAGCAGAAAC	Reverse check in primer
ROB1.P1	ROB1_KO_F	cgagaagtctaaaactaaaaaaaaaatataaagaacgattctgaactattagaacattcaggaacaccACCAGTGTGATGGATATCTGC	Forward primer to KO ROB1
ROB1.P2	ROB1_KO_R	tataattgaaaaaactatttagaatttaaaataaaaaacaaaaaataaaaactagtaataataataactAGCTCGGATCCACTAGTAACG	Reverse primer to KO ROB1
ROB1.P3	sgRNA_F_ROB1	acctggtgggaaatcaaataGTTTTAGAGCTAGAAATAGCAAGTTAAA	Forward primer for amplification of sgRNA scaffold with overlapping ROB1 guide sequence
ROB1.P4	SNR52_R/ROB1	tatttgatttcccaccaggtCAAATTAAAAATAGTTTACGCAAGTC	Reverse primer for amplification of sgRNA scaffold with overlapping ROB1 guide sequence
ROB1.P5	ROB1_F_PUP118	CCACCACCTTTTTAAACGAA	Forward check in primer
ROB1.P6	ROB1_R-513	GTGGACGTGAAAGTTTGCAC	Reverse check in primer
NRG1.P1	NRG1_KO_F	taacaataaaacatcgttatcctgtttctcatctcaaaatttttccctgctagtttcattaagaatcaaacaatcattGAAGCTTCGTACGCTGCAGGTC	Forward primer to KO NRG1
NRG1.P2	NRG1_KO_R	cagtaaccataacaaaaaaaaactaaacccaagcaattaaccatccaaatttaacccgttttataatacaattttgaccacatTCTGATATCATCGATGAATTCGAG	Reverse primer to KO NRG1
NRG1.P3	sgRNA_F_NRG1	cttttgatcatgccaaaataGTTTTAGAGCTAGAAATAGCAAGTTAAA	Forward primer for amplification of sgRNA scaffold with overlapping ROB1 guide sequence
NRG1.P4	SNR52_R/NRG1	tattttggcatgatcaaaagCAAATTAAAAATAGTTTACGCAAGTC	Reverse primer for amplification of sgRNA scaffold with overlapping ROB1 guide sequence
NRG1.P5	NRG1_PUP 139	GCTTTACAAGAGAACCTCATTG	Forward check in primer
NRG1.P6	NRG1_R-908	TTTGTTCCAACATGTGAAGC	Reverse check in primer
UME6.1	UME6_KO_F	atattctatatcttcactccaaacatcaatatcctcaatttacttccaattagttttattttttaatccactgtataaGAAGCTTCGTACGCTGCAGGTC	Forward primer to KO UME6
UME6.2	UME6_KO_R	cggcaacaacaacaacaacaataaccaccgtcaaccgtcaacctgttaattcttaattcttaacttagcctaattTCTGATATCATCGATGAATTCGAG	Reverse primer to KO UME6
UME6.3	sgRNA_F_UME6	aagctaaaacaaaaatttctGTTTTAGAGCTAGAAATAGCAAGTTAAA	Forward primer for amplification of sgRNA scaffold with overlapping UME6 guide sequence
UME6.4	SNR52_R/UME6	agaaatttttgttttagcttCAAATTAAAAATAGTTTACGCAAGTC	Reverse primer for amplification of sgRNA scaffold with overlapping UME6 guide sequence
UME6.5	UME6_PUP 110	CGAGGGATATCAATAACCTATATTC	Forward check in primer
UME6.6	UME6_R-1787	GGTAATCCATGATGTGATCCATG	Reverse check in primer
pSN52 (HIS1)	Cd_HIS1_R-833	AACACAACTGCACAATCTGG
pSN69 (ARG4)	Cd_ARG1_R-355	GATCATTTCTGGATCTACCAG
pFA-LAL (ARG4)	ARG1_R-302	CGACGTTCATTAGCAGTATG
pFA-LHL (HIS1)	HIS1_R-176	GCAGGCAAGAAGATTAATGC

## Sheet: qPCR Primer 
Primer name	Sequence
Ca_qPCR_ACT1_F	GGTGATGAAGCCCAATCC
Ca_qPCR_ACT1_R	TTGGATTCATTGGAGCTTCGG
Ca_qPCR_STP2_F	CATCTTCAGCGTCGTCTACATC
Ca_qPCR_STP2_R	GATTGAAATAAGGTGGTTGTTGGG
